# Supplementary material
Source: PubMed Central journal article supplement (PMC5136459)
Supplement: NIHMS823556-supplement-SI_PDF.pdf [file NIHMS823556-supplement-SI_PDF.pdf]

*Supporting Information***Diels-Alder Reactions of Furans with Itaconic Anhydride:  
Overcoming Unfavorable Thermodynamics**

Ashok D. Pehere, Shu Xu, Severin K. Thompson, Marc A. Hillmyer and Thomas R. Hoye\*

*Dept. of Chem., University of Minnesota, 207 Pleasant St. SE, Minneapolis, MN 55455*

\*email: hoye@umn.edu

|                                                                                                                                                                                                                       |      |
|-----------------------------------------------------------------------------------------------------------------------------------------------------------------------------------------------------------------------|------|
| <b>SI Contents</b> .....                                                                                                                                                                                              | S1   |
| <b>I. General experimental protocols</b> .....                                                                                                                                                                        | S2   |
| <b>II. Preparation procedures and characterization data for all new compounds</b> .....                                                                                                                               | S3   |
| <b>III. Full-page versions of Figure 3, <sup>1</sup>H NMR spectra of equilibrium reaction mixtures of products 4, 7, 9, and 11 (Figures S4-S7), and of retro-DA of 14 (Figure S8).....</b>                            | S16  |
| <b>IV. Computational (DFT) methodology used and free energies and geometries for 13'/13, 14'/14, 13'<sup>Me</sup>/13<sup>Me</sup>, 14'<sup>Me</sup>/14<sup>Me</sup>, 15a<sup>Me</sup>, and 15b<sup>Me</sup> .....</b> | S23  |
| <b>V. Discussion of NMR-based assignment of relative configuration to 4-exo vs. 4-endo, including comparisons between computed and experimental chemical shifts .....</b>                                             | S56  |
| <b>VI. References for the Supporting Information.....</b>                                                                                                                                                             | S67  |
| <b>VII. Copies of NMR spectra .....</b>                                                                                                                                                                               |      |
| <sup>1</sup> H and <sup>13</sup> C NMR spectra of <b>4-endo</b> .....                                                                                                                                                 | S68  |
| <sup>1</sup> H and <sup>13</sup> C NMR spectra of <b>4-endo-h2</b> .....                                                                                                                                              | S71  |
| <sup>1</sup> H and <sup>13</sup> C NMR spectra of <b>4-exo</b> .....                                                                                                                                                  | S74  |
| <sup>1</sup> H and <sup>13</sup> C NMR spectra of <b>4-exo-h2</b> .....                                                                                                                                               | S77  |
| <sup>1</sup> H and <sup>13</sup> C NMR spectra of <b>5</b> .....                                                                                                                                                      | S80  |
| <sup>1</sup> H NMR spectrum of <b>12-dist-endo</b> .....                                                                                                                                                              | S82  |
| <sup>1</sup> H NMR spectrum of <b>12-dist-exo</b> .....                                                                                                                                                               | S83  |
| <sup>1</sup> H NMR spectrum of <b>12-prox-endo</b> .....                                                                                                                                                              | S84  |
| <sup>1</sup> H and <sup>13</sup> C NMR spectra of <b>13</b> .....                                                                                                                                                     | S85  |
| <sup>1</sup> H NMR spectrum of <b>13<sup>Me</sup></b> .....                                                                                                                                                           | S88  |
| <sup>1</sup> H and <sup>13</sup> C NMR spectra of <b>14</b> .....                                                                                                                                                     | S89  |
| <sup>1</sup> H and <sup>13</sup> C NMR spectra of <b>14<sup>Me</sup></b> .....                                                                                                                                        | S92  |
| <sup>1</sup> H and <sup>13</sup> C NMR spectra of <b>15a<sup>Me</sup></b> .....                                                                                                                                       | S94  |
| <sup>1</sup> H and <sup>13</sup> C NMR spectra of <b>15a</b> .....                                                                                                                                                    | S96  |
| <sup>1</sup> H and <sup>13</sup> C NMR spectra of <b>15b</b> .....                                                                                                                                                    | S98  |
| <sup>1</sup> H and <sup>13</sup> C NMR spectra of <b>15b<sup>Me</sup></b> .....                                                                                                                                       | S100 |
| <sup>1</sup> H, <sup>13</sup> C, and HMBC NMR spectra of <b>S1</b> .....                                                                                                                                              | S102 |
| <sup>1</sup> H and <sup>13</sup> C NMR spectra of <b>S2</b> .....                                                                                                                                                     | S105 |

## I. General Experimental Protocols

$^1\text{H}$  and  $^{13}\text{C}$  NMR spectra were recorded on a Bruker Avance III or Avance II 500 (500 MHz), a Bruker Avance III 400 (400 MHz), or Varian VXR 300 (300 MHz) spectrometer.  $^1\text{H}$  NMR chemical shifts in  $\text{CDCl}_3$ ,  $\text{C}_6\text{D}_6$ , or  $\text{CD}_3\text{OD}$  are referenced to TMS (0.00 ppm),  $\text{C}_6\text{HD}_5$  (7.16 ppm), or  $\text{CHD}_2\text{OD}$  (3.31 ppm), respectively. A non-first order multiplet is designated as "nfom".  $^{13}\text{C}$  NMR chemical shifts are referenced to chloroform  $\text{CDCl}_3$  at 77.16 ppm or benzene  $\text{C}_6\text{D}_6$ , at 128.06 ppm. Proton resonances are reported using the following format: chemical shift in ppm (multiplicity, coupling constants ( $J$ ) in Hz, integral value to the nearest whole proton, and assignment). Coupling constant analysis followed protocols we have earlier reported.<sup>1</sup>

Infrared (IR) spectra were recorded as solid samples on a Bruker Alpha Platinum spectrometer using attenuated total reflectance (ATR) sampling. The wavenumber of absorption bands are reported in  $\text{cm}^{-1}$ .

Medium pressure liquid chromatography (MPLC, 50-100 psi) was carried out on hand-packed silica gel (25-35  $\mu\text{m}$ , 60 Å pores) columns. A Waters HPLC pump outfitted with a Waters R401 differential refractive index detector and a Gilson UV detector was used. Flash chromatography was performed on columns silica gel columns (E. Merck, 40-63  $\mu\text{m}$ ).

Mass spectrometry data were collected on: i) an Agilent 5973 GC-MS instrument with electron impact ionization (at 70 eV) or ii) a Bruker BioTOF II instrument using electrospray ionization and a PEG internal calibrant for HRMS measurements, or iii) a Bruker Biflex III instrument to carry out the matrix-assisted laser desorption ionization time-of-flight mass spectroscopy (MALDI-ToF-MS), using 2,5-dihydroxybenzoic acid as the matrix.

## II. Preparation procedures and characterization data for all new compounds

(±)-(1*R*,2*S*,4*R*)-2'-*H*-7-Oxaspiro[bicyclo[2.2.1]heptane-2,3'-furan]-5-ene-2',5'(4'*H*)-dione (**4-endo**) and (±)-(1*R*,2*R*,4*R*)-2'-*H*-7-Oxaspiro[bicyclo[2.2.1]heptane-2,3'-furan]-5-ene-2',5'(4'*H*)-dione (**4-exo**).

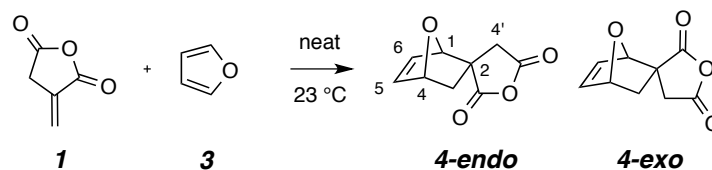

Itaconic anhydride (**1**, 164 mg, 1.46 mmol) was added to furan (**3**, 110  $\mu$ L, 1.47 mmol). The resulting suspension was stirred at ambient temperature for 48 h. The reaction mixture never became homogenous. An aliquot of the mixture was dissolved in CDCl<sub>3</sub> and quickly analyzed by <sup>1</sup>H NMR spectroscopy, which indicated ca. 60% of each of **1** and **3** along with ca. 40% of a combined mixture of the two isomeric adducts **4-endo** and **4-exo**. The material was purified by MPLC on silica gel (3:1 hexanes:EtOAc elution) to provide, in order of elution, **4-endo** (26.4 mg, 0.147 mmol, 10%) followed by **4-exo** (39.6 mg, 0.22 mmol, 15%).

### Data for **4-endo**:

<sup>1</sup>H NMR (CDCl<sub>3</sub>, 500 MHz)  $\delta$  6.66 (dd,  $J = 5.9, 1.7$  Hz, 1H), 6.36 (dd,  $J = 5.9, 1.5$  Hz, 1H), 5.20 (nfom, 1H, H<sub>4</sub>), 4.83 (dd,  $J = 1.8, 1.0$  Hz, 1H, H<sub>1</sub>), 3.20 (d,  $J = 19.1$  Hz, 1H, C<sub>4'</sub>H<sub>a</sub>H<sub>b</sub>), 3.08 (d,  $J = 19.1$  Hz, 1H, C<sub>4'</sub>H<sub>a</sub>H<sub>b</sub>), 2.07 (dd,  $J = 11.6, 3.6$  Hz, 1H, C<sub>3</sub>H<sub>a</sub>H<sub>b</sub>), and 2.05 (ddd,  $J = 11.7, 4.8, 1.2$  Hz, 1H, C<sub>3</sub>H<sub>a</sub>H<sub>b</sub>).

<sup>1</sup>H NMR (C<sub>6</sub>D<sub>6</sub>, 500 MHz)  $\delta$  5.95 (dd,  $J = 5.8, 1.4$  Hz, 1H), 5.80 (dd,  $J = 5.8, 1.0$  Hz, 1H), 4.32 (br d,  $J = 4.3$  Hz, 1H, H<sub>4</sub>), 3.68 (br s, 1H, H<sub>1</sub>), 2.29 (d,  $J = 18.9$  Hz, 1H, C<sub>4'</sub>H<sub>a</sub>H<sub>b</sub>), 1.90 (d,  $J = 18.9$  Hz, 1H, C<sub>4'</sub>H<sub>a</sub>H<sub>b</sub>), 1.24 (d,  $J = 11.6$  Hz, 1H, C<sub>3</sub>H<sub>a</sub>H<sub>b</sub>), and 0.91 (dd,  $J = 11.6, 4.5$  Hz, 1H, C<sub>3</sub>H<sub>a</sub>H<sub>b</sub>).

<sup>13</sup>C NMR (C<sub>6</sub>D<sub>6</sub>, 125 MHz)  $\delta$  173.1, 169.0, 137.9, 132.1, 85.9, 79.5, 49.3, 41.9, and 41.2.

IR (neat): 3014, 2961, 1845, 1767, 1697, 1307, 1238, 987, and 874 cm<sup>-1</sup>.

mp: 102–104 °C.

### Data for **4-exo**:

<sup>1</sup>H NMR (CDCl<sub>3</sub>, 500 MHz)  $\delta$  6.71 (dd,  $J = 5.8, 1.7$  Hz, 1H), 6.48 (dd,  $J = 5.8, 1.5$  Hz, 1H), 5.26 (d,  $J = 4.3$  Hz, 1H, H<sub>4</sub>), 5.11 (s, 1H, H<sub>1</sub>), 2.77 (d,  $J = 19.3$  Hz, 1H, C<sub>4'</sub>H<sub>a</sub>H<sub>b</sub>), 2.76 (d,  $J = 19.3$  Hz, 1H, C<sub>4'</sub>H<sub>a</sub>H<sub>b</sub>), 2.71 (dd,  $J = 11.5, 4.7$  Hz, 1H, C<sub>3</sub>H<sub>exo</sub>H<sub>endo</sub>), and 1.53 (d,  $J = 11.5$  Hz, 1H, C<sub>3</sub>H<sub>exo</sub>H<sub>endo</sub>).

<sup>1</sup>H NMR (C<sub>6</sub>D<sub>6</sub>, 500 MHz)  $\delta$  5.67 (dd,  $J = 5.8, 1.7$  Hz, 1H), 5.38 (dd,  $J = 5.8, 1.6$  Hz, 1H), 4.44 (dd,  $J = 4.7, 1.6$  Hz, 1H, H<sub>4</sub>), 4.17 (s, 1H, H<sub>1</sub>), 2.00 (dd,  $J = 11.5, 4.7$  Hz, 1H, C<sub>3</sub>H<sub>exo</sub>H<sub>endo</sub>), 1.61 (d,  $J = 18.9$  Hz, 1H, C<sub>4'</sub>H<sub>a</sub>H<sub>b</sub>), 1.52 (d,  $J = 19.0$  Hz, 1H, C<sub>4'</sub>H<sub>a</sub>H<sub>b</sub>), and 0.30 (dd,  $J = 11.5$  Hz, 1H, C<sub>3</sub>H<sub>exo</sub>H<sub>endo</sub>).

<sup>13</sup>C NMR (C<sub>6</sub>D<sub>6</sub>, 125 MHz)  $\delta$  174.6, 169.0, 139.5, 133.2, 82.5, 79.1, 49.0, 40.8, and 37.7.

IR (neat): 3032, 2947, 1839, 1769, 1229, 1097, 971, 921, 698, 434 cm<sup>-1</sup>.

mp: 159–162 °C.

(±)-(1*R*,2*S*,4*S*)-2'*H*-7-oxaspiro[bicyclo[2.2.1]heptane-2,3'-furan]-2',5'(4'*H*)-dione (**4-endo-h2**)  
and

(±)-(1*R*,2*R*,4*S*)-2'*H*-7-oxaspiro[bicyclo[2.2.1]heptane-2,3'-furan]-2',5'(4'*H*)-dione (**4-exo-h2**).

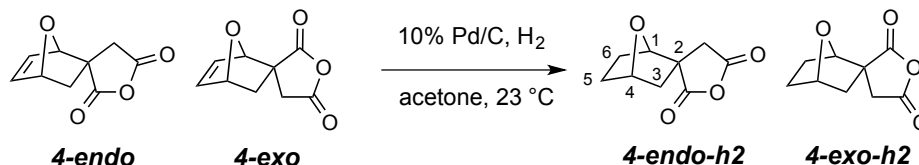

Acetone (100 mL) was placed in a 250 mL, two-neck, round-bottom flask. 10% Pd/C (600 mg) was added. The homogeneous mixture DA-adducts **4-endo** and **4-exo** described in the preceding procedure (6.0 g, 33.3 mmol) was added, and the reaction flask headspace was immediately sparged with H<sub>2</sub>. This suspension was stirred for 3 h and then filtered through a pad of Celite<sup>®</sup>, which was washed thoroughly with acetone (20 mL). The filtrate was concentrated in vacuo to provide an off-white solid, which was dried overnight under vacuum to give the crude mixture of products **4-endo-h2** and **4-exo-h2** (along with some methylsuccinic anhydride resulting from reduction of the portion of itaconic anhydride in the reactant mixture). A portion of this material (ca. 200 mg) was purified by MPLC on silica gel (5:1 hexanes:EtOAc elution) to provide, in order of elution, **4-endo-h2** (26.4 mg, 0.147 mmol, 10%) followed by **4-exo-h2** (39.6 mg, 0.22 mmol, 15%).

#### Data for **4-endo-h2**:

<sup>1</sup>H NMR (CDCl<sub>3</sub>, 500 MHz) δ 4.76 (dd, *J* = 5.3, 5.3 Hz, 1H, H<sub>4</sub>), 4.43 (d, *J* = 5.0 Hz, 1H, H<sub>1</sub>), 3.22 (d, *J* = 18.9 Hz, 1H, C<sub>4</sub>'H<sub>a</sub>H<sub>b</sub>), 2.76 (d, *J* = 19.0 Hz, 1H, C<sub>4</sub>'H<sub>a</sub>H<sub>b</sub>), 2.26 (d, *J* = 12.5 Hz, 1H, C<sub>3</sub>H<sub>endo</sub>H<sub>exo</sub>), 2.14 (ddd, *J* = 12.7, 9.0, 4.3 Hz, 1H, H<sub>6endo</sub>), 1.92 (ddd, *J* = 12.4, 5.4, 2.7 Hz, 1H, H<sub>3exo</sub>), 1.86–1.78 (nfom, 1H, H<sub>5exo</sub>), and 1.73–1.65 (m, 2H, H<sub>6exo</sub> and H<sub>5endo</sub>).

<sup>1</sup>H NMR (C<sub>6</sub>D<sub>6</sub>, 500 MHz) δ 4.00 (dd, *J* = 5.3, 5.3 Hz, 1H, H<sub>4</sub>), 3.31 (d, *J* = 5.2 Hz, 1H, H<sub>1</sub>), 2.37 (d, *J* = 18.7 Hz, 1H, C<sub>4</sub>'H<sub>a</sub>H<sub>b</sub>), 1.77 (ddd, *J* = 12.7, 9.0, 4.3 Hz, 1H, H<sub>6endo</sub>), 1.55 (d, *J* = 18.7 Hz, 1H, C<sub>4</sub>'H<sub>a</sub>H<sub>b</sub>), 1.52 (d, *J* = 12.5 Hz, 1H, C<sub>3</sub>H<sub>endo</sub>H<sub>exo</sub>), 1.28 (dddd, *J* = 12.1, 12.1, 4.7, 4.7, 2.6 Hz, 1H, H<sub>5exo</sub>), 1.18 (ddd, *J* = 11.7, 9.1, 4.6 Hz, 1H, H<sub>5endo</sub>), 1.07 (dddd, *J* = 12.6, 12.6, 4.9, 4.9 Hz, 1H, H<sub>6exo</sub>), and 0.85 (ddd, *J* = 12.5, 5.4, 2.7 Hz, 1H, H<sub>3exo</sub>).

<sup>13</sup>C NMR (C<sub>6</sub>D<sub>6</sub>, 125 MHz) δ 173.7, 168.7, 84.4, 77.8, 54.3, 43.9, 43.9, 29.3, and 24.8.

IR (neat): 1843, 1762, 1237, 1104, 965, 872, and 460 cm<sup>-1</sup>. mp: 149–153 °C.

HRMS (ESI-TOF): Calcd for C<sub>10</sub>H<sub>14</sub>NaO<sub>5</sub><sup>+</sup> [M+MeOH+Na<sup>+</sup>] requires 237.0733; found 233.0725

#### Data for **4-exo-h2**:

<sup>1</sup>H NMR (500 MHz, CDCl<sub>3</sub>) δ 4.79 (dd, *J* = 5.1, 5.1 Hz, 1H, H<sub>4</sub>), 4.73 (d, *J* = 4.6 Hz, 1H, H<sub>1</sub>), 3.09 (d, *J* = 18.7 Hz, 1H, C<sub>4</sub>'H<sub>a</sub>H<sub>b</sub>), 3.02 (d, *J* = 18.8 Hz, 1H, C<sub>4</sub>'H<sub>a</sub>H<sub>b</sub>), 2.50 (ddd, *J* = 12.3, 5.4, 1.9 Hz, 1H, H<sub>3exo</sub>), 1.93–1.84 (m, 2H), 1.84–1.75 (nfom, 1H, H<sub>6endo</sub>), 1.63 (d, *J* = 12.3 Hz, 1H, H<sub>3endo</sub>), and 1.60–1.52 (nfom, 1H, H<sub>5endo</sub>).

<sup>1</sup>H NMR (C<sub>6</sub>D<sub>6</sub>, 500 MHz) δ 4.12 (dd, *J* = 4.1, 4.1 Hz, 1H, H<sub>4</sub>), 3.92 (d, *J* = 5.2 Hz, 1H, H<sub>1</sub>),



1.86 (d,  $J = 18.5$  Hz, 1H, C4' $H_aH_b$ ), 1.86 (ddd,  $J = 12.3, 5.4, 2.7$  Hz, 1H, H3<sub>exo</sub>), 1.77 (d,  $J = 18.5$  Hz, 1H, C4' $H_aH_b$ ), 1.22 (dddd,  $J = 12.1, 12.1, 5.4, 3.9, 2.8$  Hz, 1H, H5<sub>exo</sub>), 1.09 (dddd,  $J = 12.7, 12.7, 4.9, 4.9$  Hz, 1H, H6<sub>exo</sub>), 0.75 (ddd,  $J = 12.8, 9.0, 3.9$  Hz, 1H, H6<sub>endo</sub>), 0.62 (ddd,  $J = 11.8, 9.3, 4.9$  Hz, 1H, H5<sub>endo</sub>), and 0.47 (d,  $J = 12.3$  Hz, 1H, H3<sub>endo</sub>).

<sup>13</sup>C NMR (C<sub>6</sub>D<sub>6</sub>, 125 MHz)  $\delta$  174.2, 169.0, 80.8, 76.9, 52.3, 43.7, 36.8, 29.0, and 26.3.

**IR (neat):** 3007, 2975, 2949, 2875, 1843, 1762, 1455, 1307, 1237, 1104, 965, and 873 cm<sup>-1</sup>.

**HRMS (ESI-TOF):** Calcd for C<sub>10</sub>H<sub>14</sub>NaO<sub>5</sub><sup>+</sup> [M+MeOH+Na<sup>+</sup>] requires 237.0733; found 233.0740.

**mp:** 156–158 °C.

**(±)- (1R,2S,4S)-2-(Carboxymethyl)-7-oxabicyclo[2.2.1]heptane-2-carboxylic acid (5)**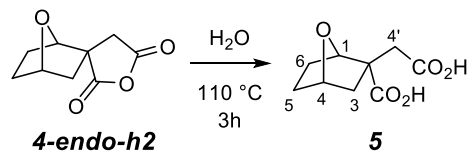

Anhydride **4-endo-h2** (4 mg) was suspended in deionized water (1 mL) in a 10 mL culture tube. The reaction mixture was heated to 110 °C to give a clear solution, which was stirred for 3h. The solution was cooled to room temperature and extracted with 4 mL of ethyl acetate. The organic layer was dried over anhydrous MgSO<sub>4</sub> and concentrated in vacuo to give the diacid **5** as a white solid (3.5 mg, 81%).

**<sup>1</sup>H NMR** (500 MHz, acetone-*d*<sub>6</sub>) δ 11.12–10.60 (br s, 2H, CO<sub>2</sub>H), 4.56 (dd, *J* = 5.2, 5.2 Hz, 1H, H4), 4.25 (d, *J* = 4.7 Hz, 1H, H1), 3.05 (d, *J* = 16.5 Hz, 1H, C4'*H<sub>a</sub>H<sub>b</sub>*), 2.60 (d, *J* = 16.5 Hz, 1H, C4'*H<sub>a</sub>H<sub>b</sub>*), 2.31 (d, *J* = 12.5 Hz, 1H, C3*H<sub>endo</sub>H<sub>exo</sub>*), 1.72–1.65 (m, 1H), 1.65–1.59 (m, 1H), 1.59–1.54 (m, 2H), and 1.54–1.48 (m, 1H).

**<sup>13</sup>C NMR** (125 MHz, acetone-*d*<sub>6</sub>) δ 174.9, 172.8, 82.8, 79.0, 56.0, 43.7, 41.2, 29.8, and 26.9.

**IR** (neat): 3300–2500 (br), 2997, 2990, 2974, 1727, 1692, 1411, 1255, 1190, 1145, 1039, 980, 913, 859, and 821 cm<sup>-1</sup>

**HRMS** (ESI-TOF): Calcd for C<sub>9</sub>H<sub>12</sub>NaO<sub>5</sub><sup>+</sup> [M+Na<sup>+</sup>] requires 233.0577; found 233.0573.

**mp**: 170–173 °C.

**Isolation of anhydrides 12-dist:**

(±)-(1*S*,2*R*,4*S*)-4-(Hydroxymethyl)-2'-H-7-oxaspiro[bicyclo[2.2.1]heptane-2,3'-furan]-5-ene-2',5'(4'H)-dione (**12-dist-endo**) and

(±)-(1*S*,2*S*,4*S*)-4-(Hydroxymethyl)-2'-H-7-oxaspiro[bicyclo[2.2.1]heptane-2,3'-furan]-5-ene-2',5'(4'H)-dione (**12-dist-exo**)

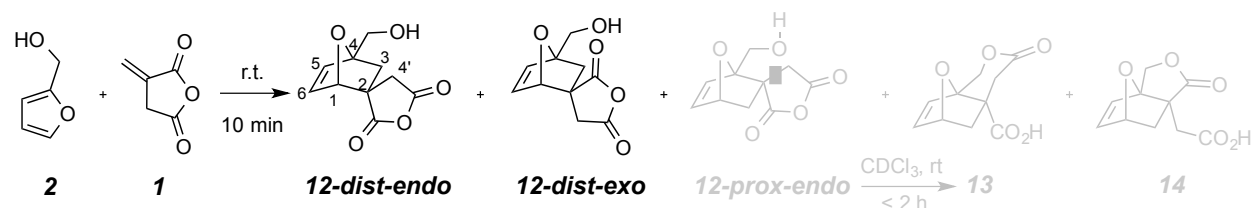

Itaconic anhydride (**1**, 3.0 g, 26.7 mmol) was suspended in furfuryl alcohol (**2**, 2.3 mL, 2.6 g, 26.7 mmol) and this slurry was allowed to stir (magnetically) at ambient temperature. After ca. 10 minutes, a portion (200 mg) of the mixture was purified by MPLC (hexanes:EtOAc 3:1) to give the anhydrides **12-dist-endo** (1 mg, 0.5%) and **12-dist-exo** (1 mg, 0.5%), each as a white solid. The chromatographic effluent and NMR sample solutions of these compounds were handled and analyzed quickly, because they were susceptible to reversion back to **1** and **2**. (also, see following procedure for isolation of **12-prox-endo** and **13**.)

**Data for 12-dist-endo:**

<sup>1</sup>H NMR (500 MHz, CDCl<sub>3</sub>) δ 6.59 (d, *J* = 5.8 Hz, 1H, H5), 6.42 (dd, *J* = 5.8, 1.3 Hz, 1H, H6), 4.84 (d, *J* = 1.5 Hz, 1H, H1), 4.18 (d, *J* = 12.5 Hz, 1H, CH<sub>a</sub>H<sub>b</sub>OH), 4.05 (d, *J* = 12.6 Hz, 1H, CH<sub>a</sub>H<sub>b</sub>OH), 3.22 (d, *J* = 19.1 Hz, 1H, C4'<sub>a</sub>), 3.12 (d, *J* = 19.1 Hz, 1H, C4'<sub>b</sub>), 2.08 (d, *J* = 11.5 Hz, 1H, C3H<sub>a</sub>), 2.02 (d, *J* = 11.5 Hz, 1H, C3H<sub>b</sub>), and 1.78 (br s, 1H, OH).

**Data for 12-dist-exo:**

<sup>1</sup>H NMR (500 MHz, CDCl<sub>3</sub>) δ 6.67 (d, *J* = 5.8 Hz, 1H, H5), 6.54 (dd, *J* = 5.8, 1.4 Hz, 1H, H6), 5.11 (d, *J* = 1.6 Hz, 1H, H1), 4.18 (d, *J* = 12.6 Hz, 1H, CH<sub>a</sub>H<sub>b</sub>OH), 4.11 (d, *J* = 12.6 Hz, 1H, CH<sub>a</sub>H<sub>b</sub>OH), 2.79 (s, 2H, H4'), 2.62 (d, *J* = 11.5 Hz, 1H, C3H<sub>a</sub>), 1.95 (br s, 1H, OH), and 1.55 (d, *J* = 11.5 Hz, 1H, C3H<sub>b</sub>).

**Isolation of lactone acid 13:****(±)-(4a*S*,6*R*,8a*R*)-3-Oxo-3,4,5,6-tetrahydro-1*H*,4a*H*-6,8a-epoxyisochromene-4a-carboxylic acid (13)**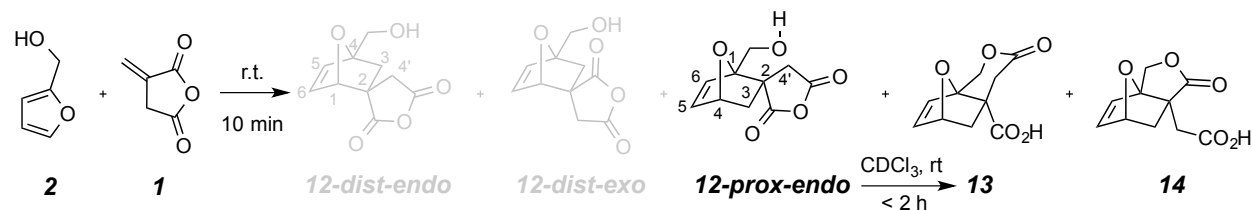

Itaconic anhydride (**1**, 3.0 g, 26.7 mmol) was suspended in furfuryl alcohol (**2**, 2.3 mL, 2.6 g, 26.7 mmol) and this slurry was allowed to stir (magnetically) at ambient temperature. After ca. 10 minutes, a portion (200 mg) of the mixture was purified by MPLC (hexanes:EtOAc 3:1) to give a fraction containing, principally, **12-prox-endo** and **13**. Upon standing, the **12-prox-endo** in a  $\text{CDCl}_3$  solution of this mixture was observed to fully convert to the 6-membered lactone acid **13** (see copy of  $^1\text{H}$  NMR spectrum for **12-prox-endo**), which was then obtained as white solid (1 mg, 0.5%). (also, see previous procedure for isolation of **12-dist-endo** and **12-dist-exo**.)

**Data for 13**

$^1\text{H}$  NMR (500 MHz, acetone- $d_6$ )  $\delta$  6.64 (dd,  $J = 5.7, 1.7$  Hz, 1H, H7), 6.21 (d,  $J = 5.7$  Hz, 1H, H8), 5.12 (d,  $J = 13.2$  Hz, 1H, H1a), 5.06 (dd,  $J = 4.8, 1.6$  Hz, 1H, H6), 4.69 (d,  $J = 13.2$  Hz, 1H, H1b), 3.03 (d,  $J = 16.8$  Hz, 1H, C4H<sub>a</sub>H<sub>b</sub>), 2.70 (d,  $J = 16.8$  Hz, 1H, C4H<sub>a</sub>H<sub>b</sub>), 2.15 (d,  $J = 11.8$  Hz, 1H, H5endo), and 1.96 (dd,  $J = 11.8, 4.8$  Hz, 1H, H5exo).

$^{13}\text{C}$  NMR (125 MHz,  $\text{CDCl}_3$ )  $\delta$  176.8, 168.6, 140.3, 132.4, 84.6, 79.2, 68.5, 50.5, 39.9, and 39.5.

IR (neat): 3300–2700 (br s), 3088, 2951, 1715, 1696, 1454, 1423, 1311, 1262, 1184, 1016, 954, and 853  $\text{cm}^{-1}$ .

HRMS (ESI-TOF): Calcd for  $\text{C}_{10}\text{H}_{10}\text{NaO}_5^+$  [ $\text{M}+\text{Na}^+$ ] requires 233.0420; found 233.0422.

mp: 116–121 °C.

**Data for 12-prox-endo**

$^1\text{H}$  NMR (500 MHz,  $\text{CDCl}_3$ )  $\delta$  6.66 (br d,  $J = 5.6$  Hz, 1H, H5), 6.44 (d,  $J = 5.8$  Hz, 1H, H6), 5.13 (dd,  $J = 4.5, 1.7$  Hz, 1H, H4), 4.20 (d,  $J = 10.9$  Hz, 1H, CH<sub>a</sub>H<sub>b</sub>OH), 4.07 (d,  $J = 10.9$  Hz, 1H, CH<sub>a</sub>H<sub>b</sub>OH), 3.40 (d,  $J = 19.1$  Hz, 1H, C4'H<sub>a</sub>), 2.93 (d,  $J = 19.1$  Hz, 1H, C4'H<sub>b</sub>), 2.22 (d,  $J = 11.6$  Hz, 1H, C3H<sub>endo</sub>), and 2.14 (dd,  $J = 11.6, 4.6$  Hz, 1H, C3H<sub>exo</sub>).

**Preparation of Methyl ( $\pm$ )-(4*aS*,6*R*,8*aR*)-3-Oxo-3,4,5,6-tetrahydro-1*H*,4*aH*-6,8*a*-epoxyisochromene-4*a*-carboxylate (**13**<sup>Me</sup>)**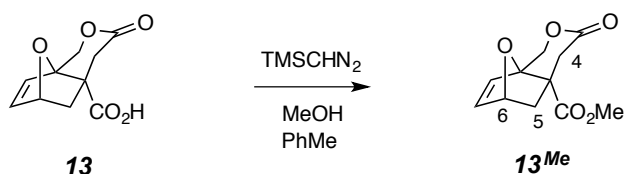

Lactone acid **13** (1 mg) was dissolved in a 1:1 mixture of MeOH and toluene (1 mL) in a 5 mL vial. Excess TMSCHN<sub>2</sub> (2 drops) was added to the solution, and the top portion of the solution turned yellow. The vial was capped and gently shaken to allowed to stand for 30 minutes. The reaction mixture was then concentrated in vacuo to give **13**<sup>Me</sup> as an off-white solid (1 mg).

**<sup>1</sup>H NMR** (400 MHz, CDCl<sub>3</sub>)  $\delta$  6.61 (dd,  $J = 5.7, 1.8$  Hz, 1H, H7), 6.06 (d,  $J = 5.7$  Hz, 1H, H8), 5.13 – 5.02 (m, 2H, H6 and C1H<sub>a</sub>H<sub>b</sub>), 4.81 (d,  $J = 13.3$  Hz, 1H, C1H<sub>a</sub>H<sub>b</sub>), 3.71 (s, 3H, CO<sub>2</sub>CH<sub>3</sub>), 3.05 (d,  $J = 16.8$  Hz, 1H, C4H<sub>a</sub>H<sub>b</sub>), 2.74 (d,  $J = 16.8$  Hz, 1H, C4H<sub>a</sub>H<sub>b</sub>), 2.20 (d,  $J = 12.0$  Hz, 1H, H5<sub>endo</sub>), and 1.97 (dd,  $J = 12.0, 4.7$  Hz, 1H, H5<sub>exo</sub>).

**(±)-2-((3a*R*,6*R*,7a*R*)-1-Oxo-6,7-dihydro-3*H*-3a,6-epoxyisobenzofuran-7a(1*H*)-yl) acetic acid (14)**

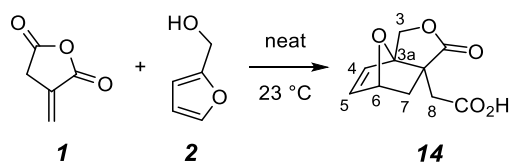

**Method A:** Itaconic anhydride (**1**, 3.0 g, 26.7 mmol) was suspended in furfuryl alcohol (**2**, 2.3 mL, 2.6 g, 26.7 mmol) and this slurry was allowed to stir (magnetically) at ambient temperature. After ca. five hour, the suspension had thickened to a paste and to the point where it could no longer be stirred. After ca. 12 hours, this mixture had turned to a solid light brown mass. The lactone **14** could be stored indefinitely as a tan crystalline solid. A fraction of the crude product (300 mg) was purified through recrystallization [EtOAc/acetone (ca. 4:1, v:v), warmed to <50 °C for only a few minutes] to give the lactone acid **14** as an off-white crystal (252 mg, 84%)

**Method B:** Itaconic anhydride (**1**, 1.5 g, 13.3 mmol) was added to furfuryl alcohol (**2**, 2.3 mL, 2.6 g, 26.7 mmol). This slurry was allowed to stir (magnetically) at ambient temperature and it turned into a clear solution in 30 minutes. After five hours, lactone acid **14** began to precipitate from this solution. After 48 hours the slurry was filtered and the solid was washed with 5 mL of dichloromethane to give **14** as a white solid (1.97 g, 70%).

**<sup>1</sup>H NMR** (500 MHz, CDCl<sub>3</sub>, sparingly soluble) δ 6.59 (dd, *J* = 5.8, 1.7 Hz, 1H, H5), 6.49 (d, *J* = 5.8 Hz, 1H, H4), 5.06 (dd, *J* = 4.7, 1.6 Hz, 1H, H6), 4.83 (d, *J* = 10.8 Hz, 1H, C3H<sub>a</sub>H<sub>b</sub>), 4.64 (d, *J* = 10.8 Hz, 1H, C3H<sub>a</sub>H<sub>b</sub>), 2.58 (dd, *J* = 12.3, 4.7 Hz, 1H, C7H<sub>endo</sub>H<sub>exo</sub>), 2.54 (d, *J* = 15.1 Hz, 1H, C8H<sub>a</sub>H<sub>b</sub>), 2.40 (d, *J* = 15.1 Hz, 1H, C8H<sub>a</sub>H<sub>b</sub>), and 1.52 (d, *J* = 12.3 Hz, 1H, C7H<sub>endo</sub>H<sub>exo</sub>).

**<sup>1</sup>H NMR** (500 MHz, acetone-*d*<sub>6</sub>) δ 6.62 (dd, *J* = 5.8, 1.5 Hz, 1H, H5), 6.59 (d, *J* = 5.8 Hz, 1H, H4), 5.03 (dd, *J* = 4.7, 1.3 Hz, 1H, H6), 4.94 (d, *J* = 10.8 Hz, 1H, C3H<sub>a</sub>H<sub>b</sub>), 4.51 (d, *J* = 10.8 Hz, 1H, C3H<sub>a</sub>H<sub>b</sub>), 2.44 (d, *J* = 15.0 Hz, 1H, C8H<sub>a</sub>H<sub>b</sub>), 2.39 (d, *J* = 15.0 Hz, 1H, C8H<sub>a</sub>H<sub>b</sub>), 2.35 (dd, *J* = 12.2, 4.8 Hz, 1H, C7H<sub>exo</sub>H<sub>endo</sub>), and 1.58 (d, *J* = 12.2 Hz, 1H, C7H<sub>exo</sub>H<sub>endo</sub>).

**<sup>13</sup>C NMR** (125 MHz, acetone-*d*<sub>6</sub>) δ 177.8, 171.2, 139.0, 131.5, 95.1, 79.6, 69.1, 52.6, 40.2, and 37.4.

**IR** (neat): 3300–2500 (br), 2994, 1705, 1397, 1324, 1154, 974, 709, and 646 cm<sup>-1</sup>.

**HRMS** (ESI-TOF): Calcd for C<sub>10</sub>H<sub>9</sub>O<sub>5</sub> [M-1<sup>-</sup>] requires 209.0455; found 209.0453.

**mp:** 137–139 °C.

**(±)-Methyl 2-((3aR,6R,7aR)-1-Oxo-6,7-dihydro-3H-3a,6-epoxyisobenzofuran-7a(1H)-yl) acetate (**14**<sup>Me</sup>)**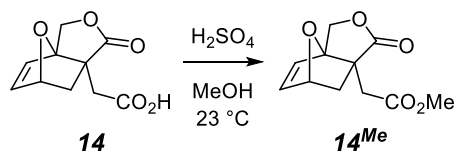

Lactone acid (**14**, 2.78 g, 13.2 mmol) was dissolved in methanol (10 mL) in a 50 mL two-neck round-bottom flask. Sulfuric acid (0.20 mL, 3.8 mmol) was added. The solution immediately turned deep brown. This solution was stirred overnight at room temperature and the color turned darker. The reaction mixture was concentrated in vacuo and the residue was purified by flash column chromatography on silica gel (CH<sub>2</sub>Cl<sub>2</sub> elution) to give lactone ester **14**<sup>Me</sup> (2.30 g, 10.3 mmol, 80%) as a white solid.

<sup>1</sup>H NMR (500 MHz, CDCl<sub>3</sub>) δ 6.54 (d, *J* = 5.8 Hz, 1H, H5), 6.48 (d, *J* = 5.8 Hz, 1H, H4), 5.03 (d, *J* = 4.7 Hz, 1H, H6), 4.78 (d, *J* = 10.8 Hz, 1H, C3H<sub>a</sub>H<sub>b</sub>), 4.59 (d, *J* = 10.8 Hz, 1H, C3H<sub>a</sub>H<sub>b</sub>), 3.67 (s, 3H, OCH<sub>3</sub>), 2.53 (d, *J* = 11.4 Hz, 1H, C7H<sub>endo</sub>H<sub>exo</sub>), 2.10 (d, *J* = 14.6 Hz, 1H, C8H<sub>a</sub>H<sub>b</sub>), 2.31 (d, *J* = 14.6 Hz, 1H, C8H<sub>a</sub>H<sub>b</sub>), and 1.48 (d, *J* = 12.2 Hz, 1H, C7H<sub>endo</sub>H<sub>exo</sub>).

<sup>13</sup>C NMR (125 MHz, CDCl<sub>3</sub>) δ 177.2, 170.0, 138.2, 130.7, 94.1, 78.8, 68.8, 52.3, 52.1, 39.9, and 36.8.

IR (neat): 1767, 1723, 1437, 1320, 1523, 1178, 1129, 1047, 988, 850, and 707 cm<sup>-1</sup>.

HRMS (ESI-TOF): Calcd for C<sub>11</sub>H<sub>12</sub>NaO<sub>5</sub> [M+Na<sup>+</sup>] requires 247.0577; found 247.0583.

mp: 126–129 °C.

**1-(Furan-2-ylmethyl) 4-Methyl 2-Methylenesuccinate ( $15a^{Me}$ )**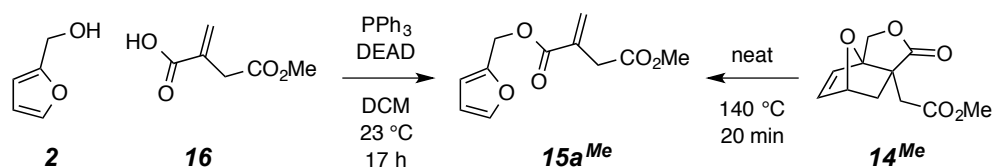

**Method A:** A mixture of (commercial) mono-methyl itaconate **16** (1.0 g, 6.9 mmol), triphenylphosphine (2.6 g, 10.0 mmol), and furfuryl alcohol (0.6 mL, 6.9 mmol) was dissolved in 20 mL of  $CH_2Cl_2$ . The solution was gently stirred for 10 min at room temperature. Diethyl azodicarboxylate (DEA, 1.5 mL, 10.2 mmol) was added to the reaction mixture, which was then stirred at room temperature for 17 h. The reaction mass was filtered and the filtrate concentrated. The residue was purified by flash column chromatography on  $SiO_2$  (hexanes/EtOAc, 3:1) to give  $15a^{Me}$  (1.9 g, 85%) as a colorless oil.

**Method B:** A neat sample of the lactone methyl ester  $14^{Me}$  (200 mg, 0.89 mmol) was placed in a vial and heated to  $140\text{ }^\circ\text{C}$  for 20 min. The vial was allowed to cool to room temperature to leave a black oil. This residue was purified by flash column chromatography on  $SiO_2$  (hexanes/EtOAc, 3:1) to give  $15a^{Me}$  as a colorless oil (153 mg, 75%).

$^1\text{H NMR}$  (500 MHz,  $CDCl_3$ )  $\delta$  7.41 (dd,  $J = 1.7, 0.7$  Hz, 1H,  $H_{5'}$ ), 6.42 (d,  $J = 3.2$  Hz, 1H,  $H_{3'}$ ), 6.36–6.35 (m, 2H,  $H_{4'}$  and  $=CH_ZH_E$ ), 5.72 (br s, 1H,  $=CH_ZH_E$ ), 5.15 (s, 2H, furanyl $CH_2O$ ), 3.66 (s, 3H,  $CH_3O$ ), and 3.34 (dd,  $J = 1.1, 1.1$  Hz, 2H,  $C3H_2$ ).

$^{13}\text{C NMR}$  (125 MHz,  $CDCl_3$ )  $\delta$  171.2, 165.9, 149.4, 143.4, 133.6, 129.3, 110.9, 110.7, 58.8, 52.2, and 37.7.

**IR** (neat): 2955, 1717, 1637, 1422, 1289, 1152, 1014, 814, and  $749\text{ cm}^{-1}$ .

**HRMS** (ESI-TOF): Calcd for  $C_{11}H_{12}NaO_5^+$  [ $M+Na^+$ ] requires 247.0582; found 247.0575.

**TLC:**  $R_f$  0.52 (5:1 Hex/EtOAc).



**3-((Furan-2-ylmethoxy)carbonyl)but-3-enoic acid (15a) and  
4-((Furan-2-ylmethoxy)-2-methylene-4-oxobutanoic acid (15b)**

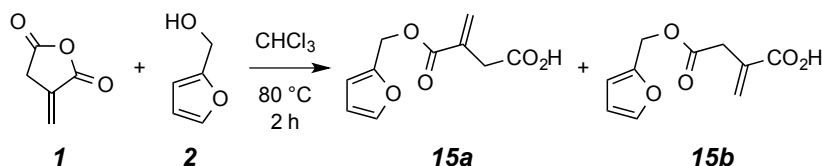

A mixture of itaconic anhydride (**1**, 200 mg, 1.7 mmol) and furfuryl alcohol (**2**, 175 mg, 1.7 mmol) was dissolved in 4 mL of  $\text{CDCl}_3$  in a round-bottom flask. The solution was heated to  $80\text{ }^\circ\text{C}$  and stirred for 2 h. The reaction mass was concentrated. A  $^1\text{H}$  NMR spectrum of an aliquot indicated the presence of **15b** (major) and **15a** (minor) in a ratio of 4:1. This material was purified by MPLC ( $\text{SiO}_2$ , hexanes/EtOAc, 3:1) to give a pure sample of **15b** (0.12 g, 40%) as a white solid followed by a small portion (peak shaving) of a sample containing an ca. 2:1 ratio of **15b:15a**, from which the NMR spectral data listed below were extracted.

**Data for 15b**

$^1\text{H}$  NMR (500 MHz,  $\text{CDCl}_3$ )  $\delta$  7.42 (d,  $J = 1.7$  Hz, 1H, H5'), 6.47 (s, 1H, = $\text{CH}_2\text{H}_E$ ), 6.41 (d,  $J = 3.2$  Hz, 1H, H3'), 6.36 (dd,  $J = 3.2, 1.9$  Hz, 1H, H4'), 5.83 (s, 1H, = $\text{CH}_2\text{H}_E$ ), 5.11 (s, 2H,  $\text{CH}_2\text{O}$ ), and 3.37 [s, 2H, ( $\text{HOOC}$ ) $\text{C}(=\text{CH}_2)\text{CH}_2$ ].

$^{13}\text{C}$  NMR (125 MHz,  $\text{CDCl}_3$ )  $\delta$  171.0, 170.4, 149.3, 143.5, 133.1, 131.1, 111.0, 110.8, 58.8, and 37.3.

IR (neat): 3300–2500 (br), 3116, 2968, 2903, 2751, 1735, 1695, 1635, 1321, 1168, 1152, 930, 915, and  $744\text{ cm}^{-1}$ .

HRMS (ESI-TOF): Calcd for  $\text{C}_{10}\text{H}_{10}\text{NaO}_5^+$  [ $\text{M}+\text{Na}^+$ ] requires 233.0420; found 233.0418.

mp: 67–69  $^\circ\text{C}$ .

**Data for 15a**

$^1\text{H}$  NMR (500 MHz,  $\text{CDCl}_3$ )  $\delta$  7.42 (d,  $J = 1.7$  Hz, 1H, H5'), 6.43 (d,  $J = 3.2$  Hz, 1H, H3'), 6.39 (s, 1H, = $\text{CH}_2\text{H}_E$ ), 6.36 (dd,  $J = 3.2, 1.9$  Hz, 1H, H4'), 5.77 (s, 1H, = $\text{CH}_2\text{H}_E$ ), 5.17 (s, 2H,  $\text{CH}_2\text{O}$ ), and 3.40 [s, 2H, ( $\text{HOOC}$ ) $\text{C}(=\text{CH}_2)\text{CH}_2$ ].

$^{13}\text{C}$  NMR (125 MHz,  $\text{CDCl}_3$ )  $\delta$  176.2, 165.7, 149.1, 143.3, 133.0, 129.6, 110.9, 110.6, 58.8, and 37.5.

4-(Furan-2-ylmethyl) 1-Methyl 2-Methylenesuccinate (**15b<sup>Me</sup>**)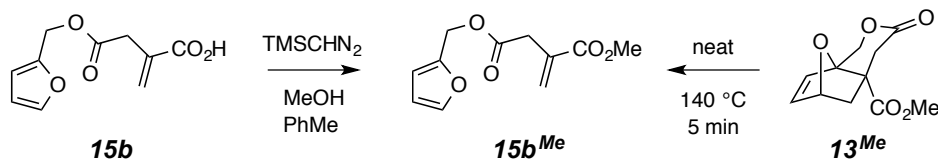

**Method A:** Mono-ester acid **15b** (1 mg) was dissolved in an equivolume mixture of MeOH and toluene (1 mL) in a 5 mL vial. Excess TMSCHN<sub>2</sub> (2 drops) was added to the solution, and the top portion of the solution turned yellow. The vial was capped, gently shaken, and allowed to stand for 30 minutes. The reaction mixture was then concentrated in vacuo to give **15b<sup>Me</sup>** as an off-white solid (1 mg).

**Method B:** A neat sample of the lactone methyl ester **13<sup>Me</sup>** (1 mg) was placed in a vial and heated in a 140 °C heating bath for 5 min. The vial was allowed to cool to room temperature to give **15a<sup>Me</sup>** as a brown solid (1 mg).

**<sup>1</sup>H NMR** (500 MHz, CDCl<sub>3</sub>) δ 7.42 (d, *J* = 1.8 Hz, 1H, H5'), 6.41 (d, *J* = 3.2 Hz, 1H, H3'), 6.36 (dd, *J* = 3.1, 1.9 Hz, 1H, H4'), 6.33 (s, 1H, =CH<sub>Z</sub>H<sub>E</sub>), 5.71 (s, 1H, =CH<sub>Z</sub>H<sub>E</sub>), 5.09 (s, 2H, CH<sub>2</sub>O), 3.74 (s, 3H, COOMe), and 3.35 (s, 2H, =C(CO<sub>2</sub>Me)CH<sub>2</sub>).

**<sup>13</sup>C NMR** (125 MHz, CDCl<sub>3</sub>) δ 170.3, 164.8, 149.3, 143.3, 133.5, 128.7, 110.8, 110.6, 58.5, 52.1, and 37.6.

**IR** (neat): 2970, 2920, 2870, 1735, 1719, 1560, 1438, 1261, 1172, 1150, 987, 916, and 799 cm<sup>-1</sup>.

**HRMS** (ESI-TOF): Calcd for C<sub>11</sub>H<sub>12</sub>NaO<sub>5</sub><sup>+</sup> [M+Na<sup>+</sup>] requires 247.0577; found 247.0587.

**4-(Benzyloxy)-2-methylene-4-oxobutanoic acid (S1) and  
3-((Benzyloxy)carbonyl)but-3-enoic acid (S2)**

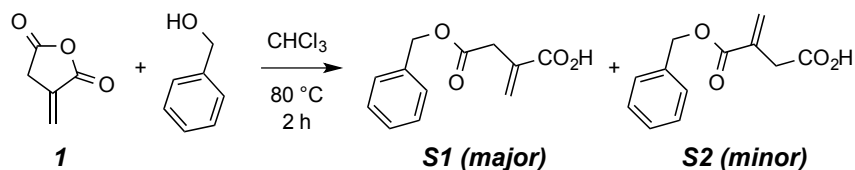

A mixture of itaconic anhydride (**1**, 200 mg, 1.7 mmol) and benzyl alcohol (204 mg, 1.7 mmol) was dissolved in 4 mL of  $\text{CDCl}_3$  in a capped culture tube. The solution was heated to  $80\text{ }^\circ\text{C}$  and stirred for 17 h. The reaction mass was concentrated. A  $^1\text{H}$  NMR spectrum of an aliquot indicated the presence of **S1** (major) and **S2** (minor) in a ratio of 8:1. This material was purified by MPLC ( $\text{SiO}_2$ , hexanes/EtOAc, 3:1) to give a pure sample of **S1** (207 mg, 51%) as a white solid, followed by a small portion (peak shaving) of a sample containing an ca. 2:1 ratio of **S1**:**S2**, from which the NMR spectral data listed below were extracted. A portion of the sample of **S1** was recrystallized (hex:EtOAc). Analysis of the HMBC spectrum of **S1** (see below) showed cross peaks that confirmed the connectivity as shown in structure **S1** [i.e., both pairs of methylene protons to the same (more upfield) resonance for the carbonyl carbon].

**Data for S1**

$^1\text{H}$  NMR (500 MHz,  $\text{CDCl}_3$ )  $\delta$  7.38–7.30 (m, 5H, PhH), 6.48 (d,  $J = 1.0$  Hz, 1H,  $=\text{CH}_2\text{H}_E$ ), 5.84 (dt,  $J = 1.1, 1.1$  Hz, 1H,  $=\text{CH}_2\text{H}_E$ ), 5.16 (s, 2H,  $\text{CH}_2\text{O}$ ), and 3.40 [s, 2H,  $(\text{HOOC})\text{C}(=\text{CH}_2)\text{CH}_2$ ].

$^{13}\text{C}$  NMR (125 MHz,  $\text{CDCl}_3$ )  $\delta$  171.3, 170.5, 135.8, 133.2, 131.1, 128.7, 128.4, 128.3, 66.9, and 37.5.

mp:  $80\text{--}84\text{ }^\circ\text{C}$  (lit.<sup>2</sup>  $80\text{--}82\text{ }^\circ\text{C}$ ).

**Data for S2**

$^1\text{H}$  NMR (500 MHz,  $\text{CDCl}_3$ )  $\delta$  7.38–7.29 (m, 5H, PhH), 6.41 (d,  $J = 1.0$  Hz, 1H,  $=\text{CH}_2\text{H}_E$ ), 5.77 (dt,  $J = 1.1, 1.1$  Hz, 1H,  $=\text{CH}_2\text{H}_E$ ), 5.22 (s, 2H,  $\text{CH}_2\text{O}$ ), and 3.42 [s, 2H,  $(\text{HOOC})\text{C}(=\text{CH}_2)\text{CH}_2$ ].

$^{13}\text{C}$  NMR (125 MHz,  $\text{CDCl}_3$ )  $\delta$  176.0, 166.0, 135.6, 133.2, 129.4, 128.6, 128.1, 127.7, 67.0, and 37.5.

### III. Full-page versions of Figure 3, $^1\text{H}$ NMR spectra of equilibrium reaction mixtures of products 4, 7, 9, and 11 (Figures S4-S7), and of retro-DA of 14 (Figure S8)

#### General procedure for the DA reaction between furan 3, 5, 7, or 9 and IA (1):

An excess amount of the furan (ca. 20 equiv) was added to a capped flask containing **1** (1 equiv) to form a slurry. The mixture was allowed to stir at room temperature. Aliquots of the mixture were periodically removed in order to monitor the progress of the DA reaction by  $^1\text{H}$  NMR analysis, which was carried out immediately after each NMR sample was prepared. To obtain useful signal to noise levels of the  $^1\text{H}$  NMR resonances for the minor amounts of product often being observed, relatively concentrated solutions of  $\text{CDCl}_3$  NMR samples were used. The percent conversion to DA adducts was recorded as the equilibrium conversion in Table 1. When the relative amounts of observed species remained constant in two consecutive aliquots, it was deemed that equilibrium had been reached. The reaction time required to reach half of the equilibrium conversion is provided as  $t_{1/2}$  in Table 1. A copy of the final equilibrium  $^1\text{H}$  NMR spectrum is provided for each of the reactions shown in entries 1-4 of Table 1 (reproduced below).

**Table 1.** (reproduced from the manuscript)

| entry | 20 : 1<br>molar ratio                                                                             |              | <i>endo</i>                                                                         | <i>exo</i>                                                                           | equil. conv.<br>(isomer ratio)<br>[ $t_{1/2}$ to equil] |
|-------|---------------------------------------------------------------------------------------------------|--------------|-------------------------------------------------------------------------------------|--------------------------------------------------------------------------------------|---------------------------------------------------------|
| 1     |  + IA <b>1</b> | neat<br>r.t. |  |  | 27%<br>(1 : 1)<br>[8 h]                                 |
|       | <b>3</b>                                                                                          |              | <b>4-endo</b>                                                                       | <b>4-exo</b>                                                                         |                                                         |
| 2     |  + IA <b>1</b> | neat<br>r.t. |  |  | ca. 5%<br>(2:1)<br>[0.25 h]                             |
|       | <b>6</b>                                                                                          |              | <b>7-endo</b>                                                                       | <b>7-exo</b>                                                                         |                                                         |
| 3     |  + IA <b>1</b> | neat<br>r.t. |  |  | ca. 13%<br>(11:8:3:1) <sup>a</sup><br>[10 h]            |
|       | <b>8</b>                                                                                          |              | <b>9-dist-endo</b><br><b>9-dist-exo</b>                                             | <b>9-prox-endo</b><br><b>9-prox-exo</b>                                              |                                                         |
| 4     |  + IA <b>1</b> | neat<br>r.t. |  |  | ca. 20%<br>(8:6:2:1) <sup>b</sup><br>[24 h]             |
|       | <b>10</b>                                                                                         |              | <b>11-dist-endo</b><br><b>11-dist-exo</b>                                           | <b>11-prox-endo</b><br><b>11-prox-exo</b>                                            |                                                         |

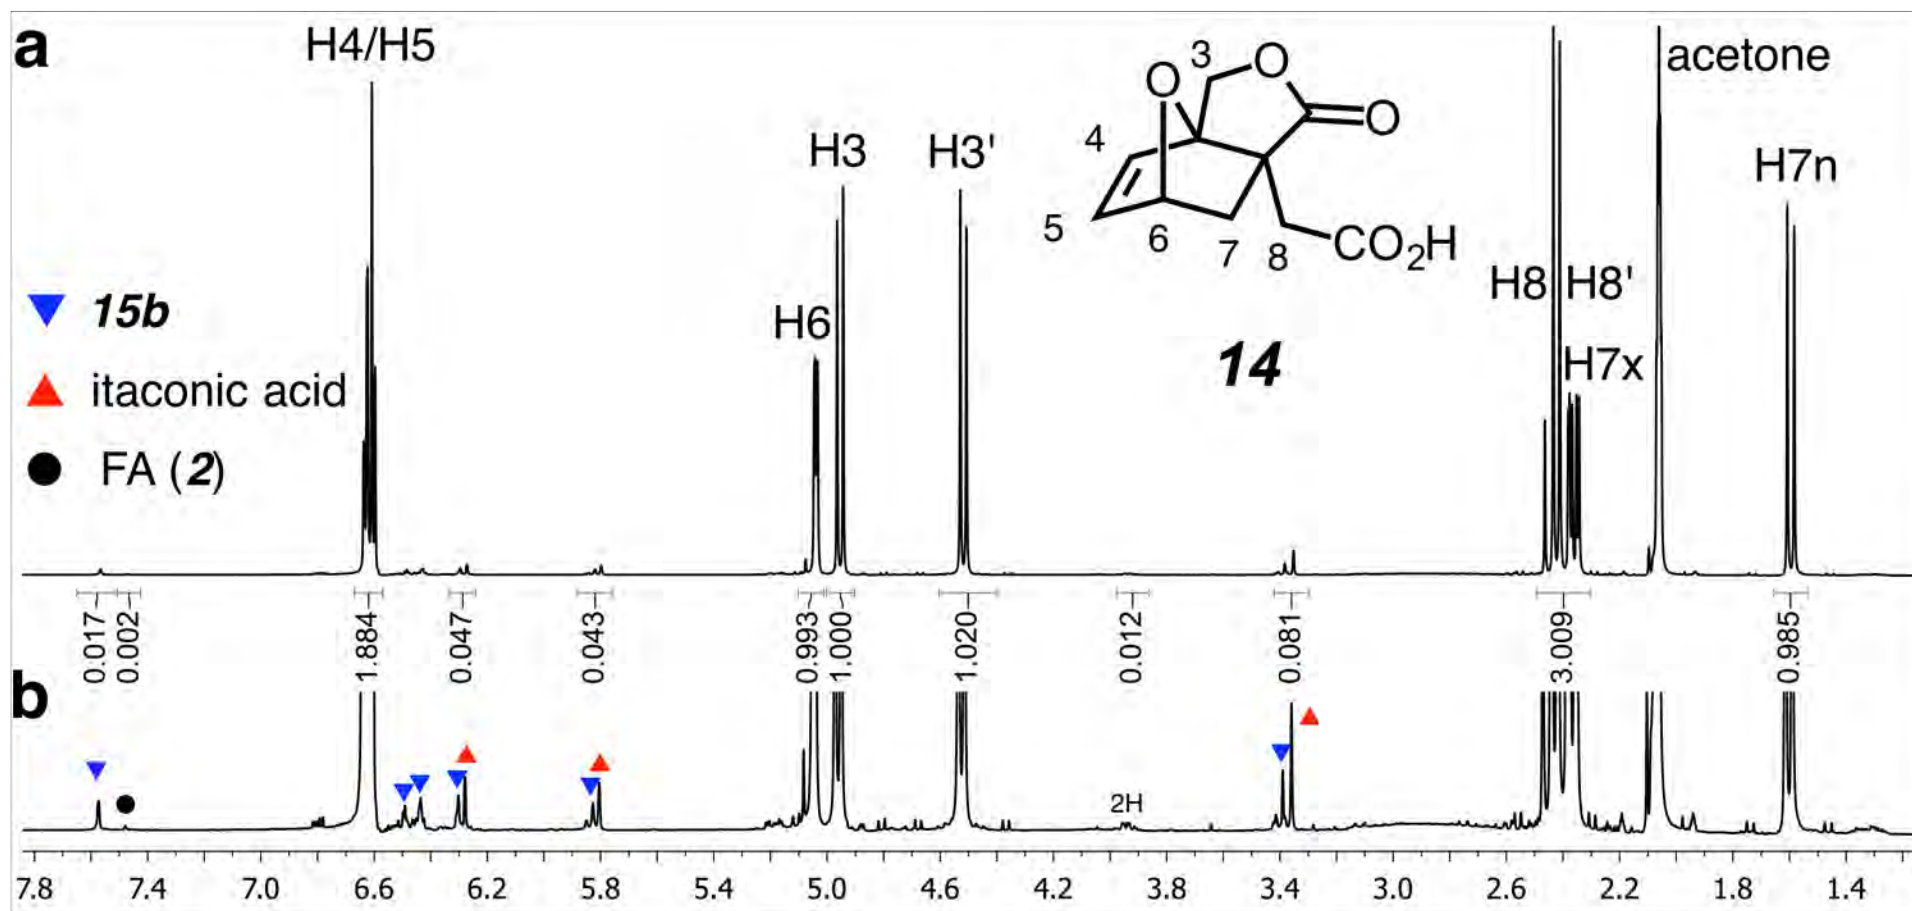

**Figure 3** (from the manuscript).  $^1\text{H}$  NMR spectrum in acetone- $d_6$  of an aliquot of the bulk reaction mixture from 1:1 IA (**1**) and FA (**2**). **a**. Resonances from the major product **14** are assigned. **b**. The principal minor components are denoted; integration of all minor components indicates a 94% yield of **14**.

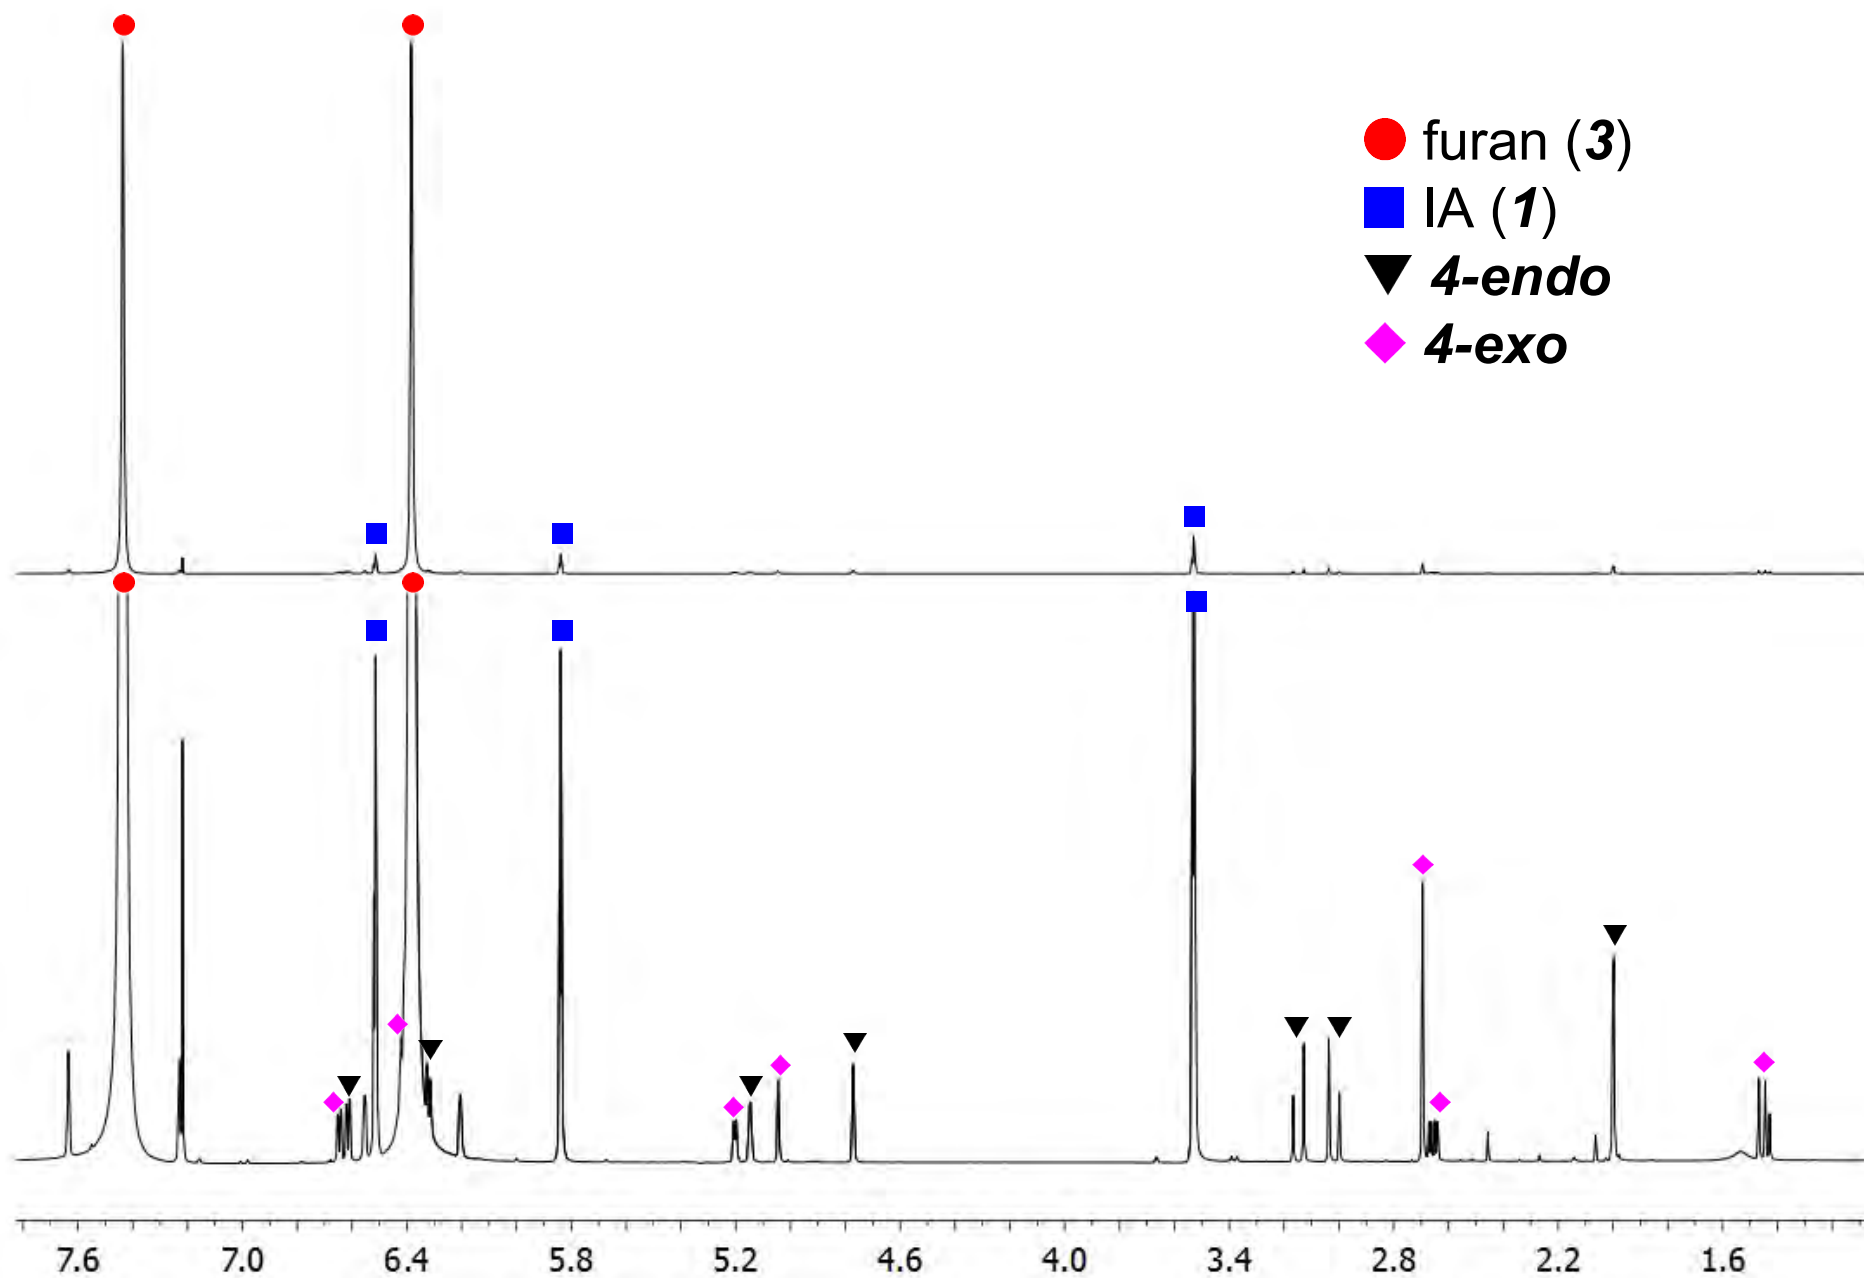

Figure S4. Entry 1 (from Table 1): Equilibrium state  $^1\text{H}$  NMR spectrum for formation of 4-endo and 4-exo

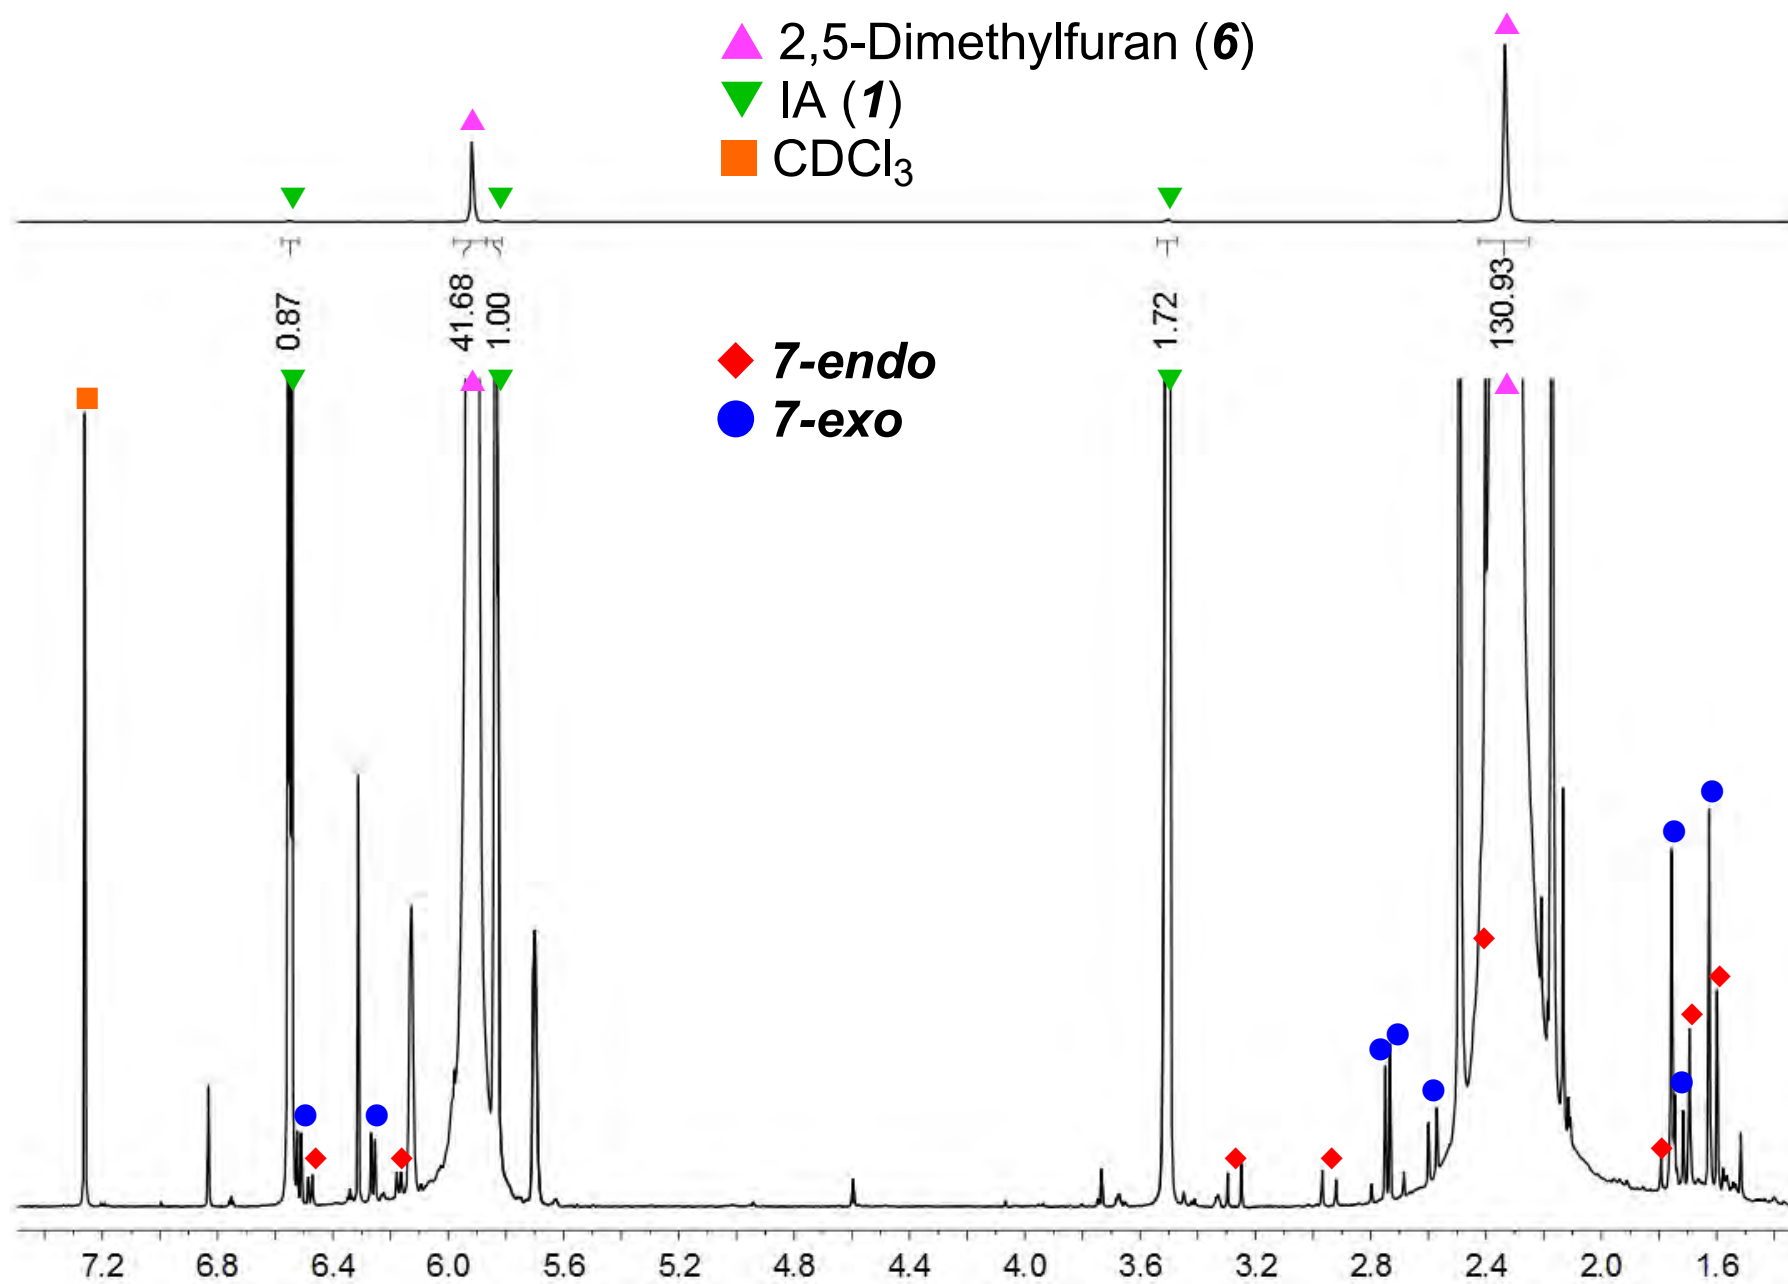

Figure S5. Entry 2 (from Table 1): Equilibrium state <sup>1</sup>H NMR spectrum for formation of 7-endo and 7-exo

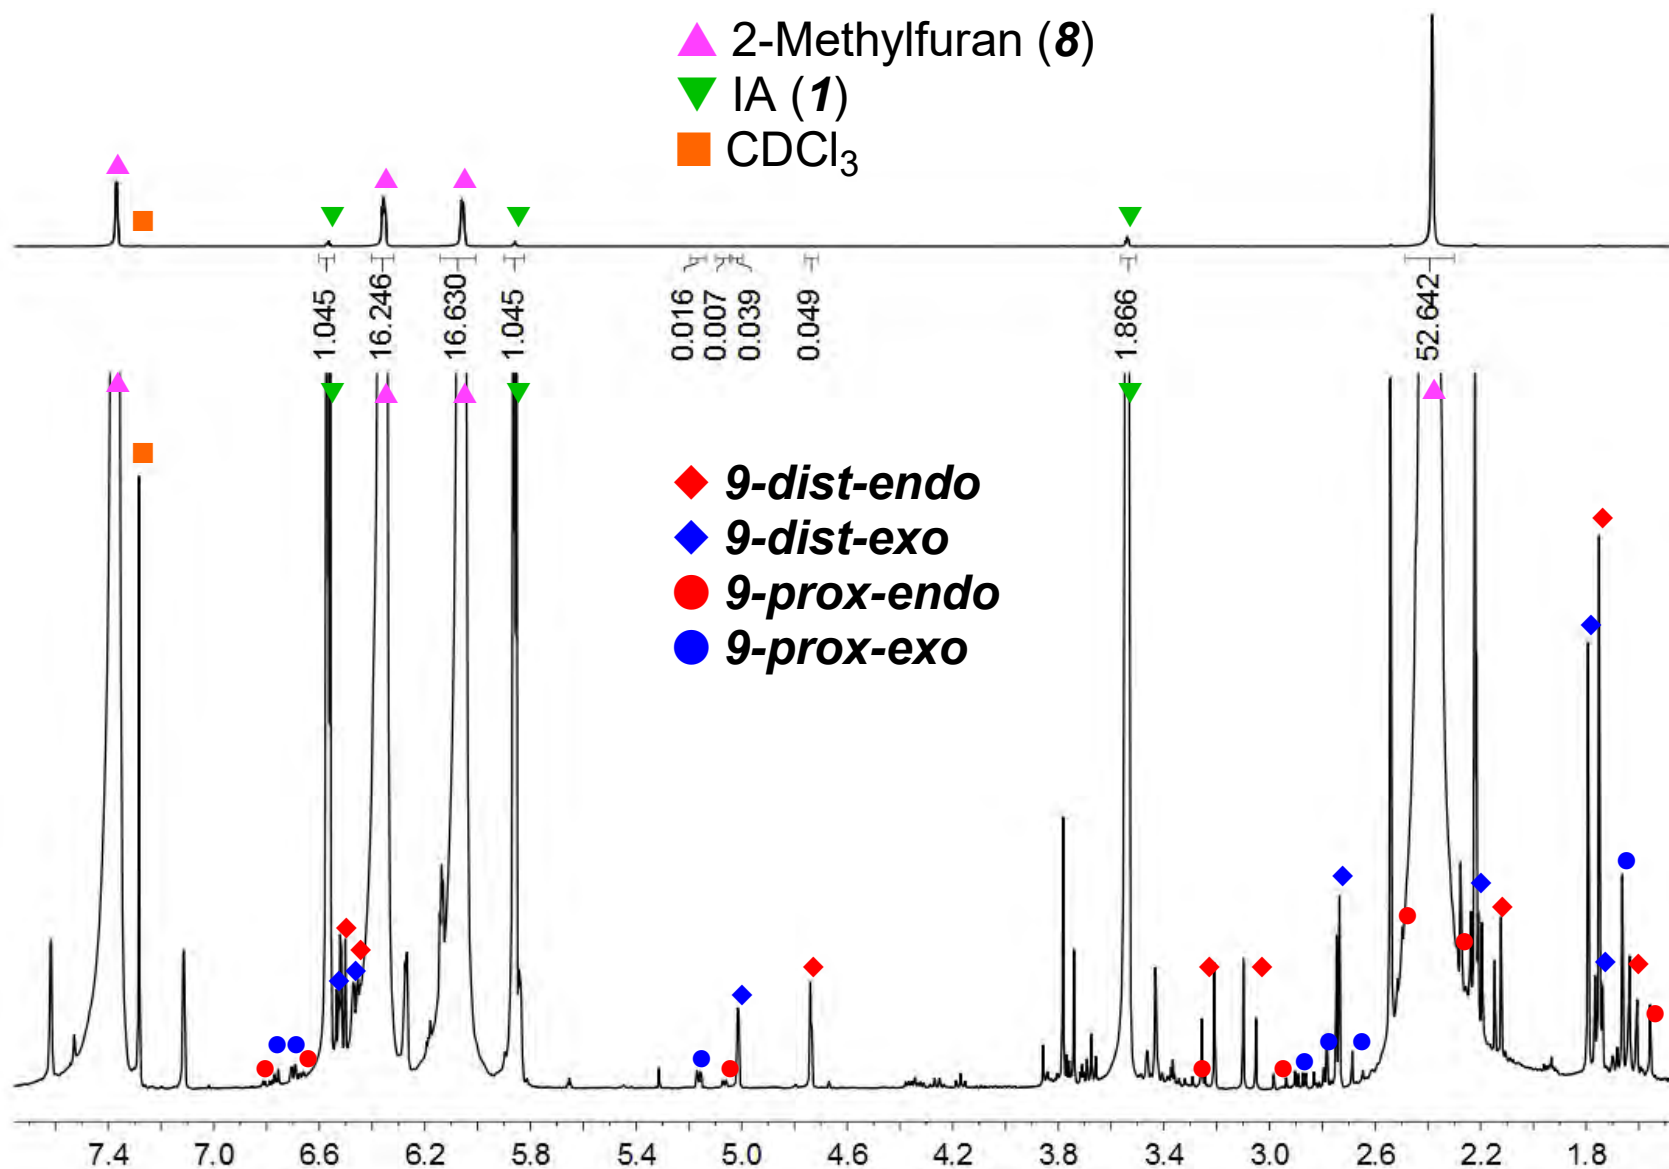

Figure S6. Entry 3 (from Table 1): Equilibrium state <sup>1</sup>H NMR spectrum for formation of *9-dist-endo*, *9-dist-exo*, *9-prox-endo*, and *9-prox-exo*.



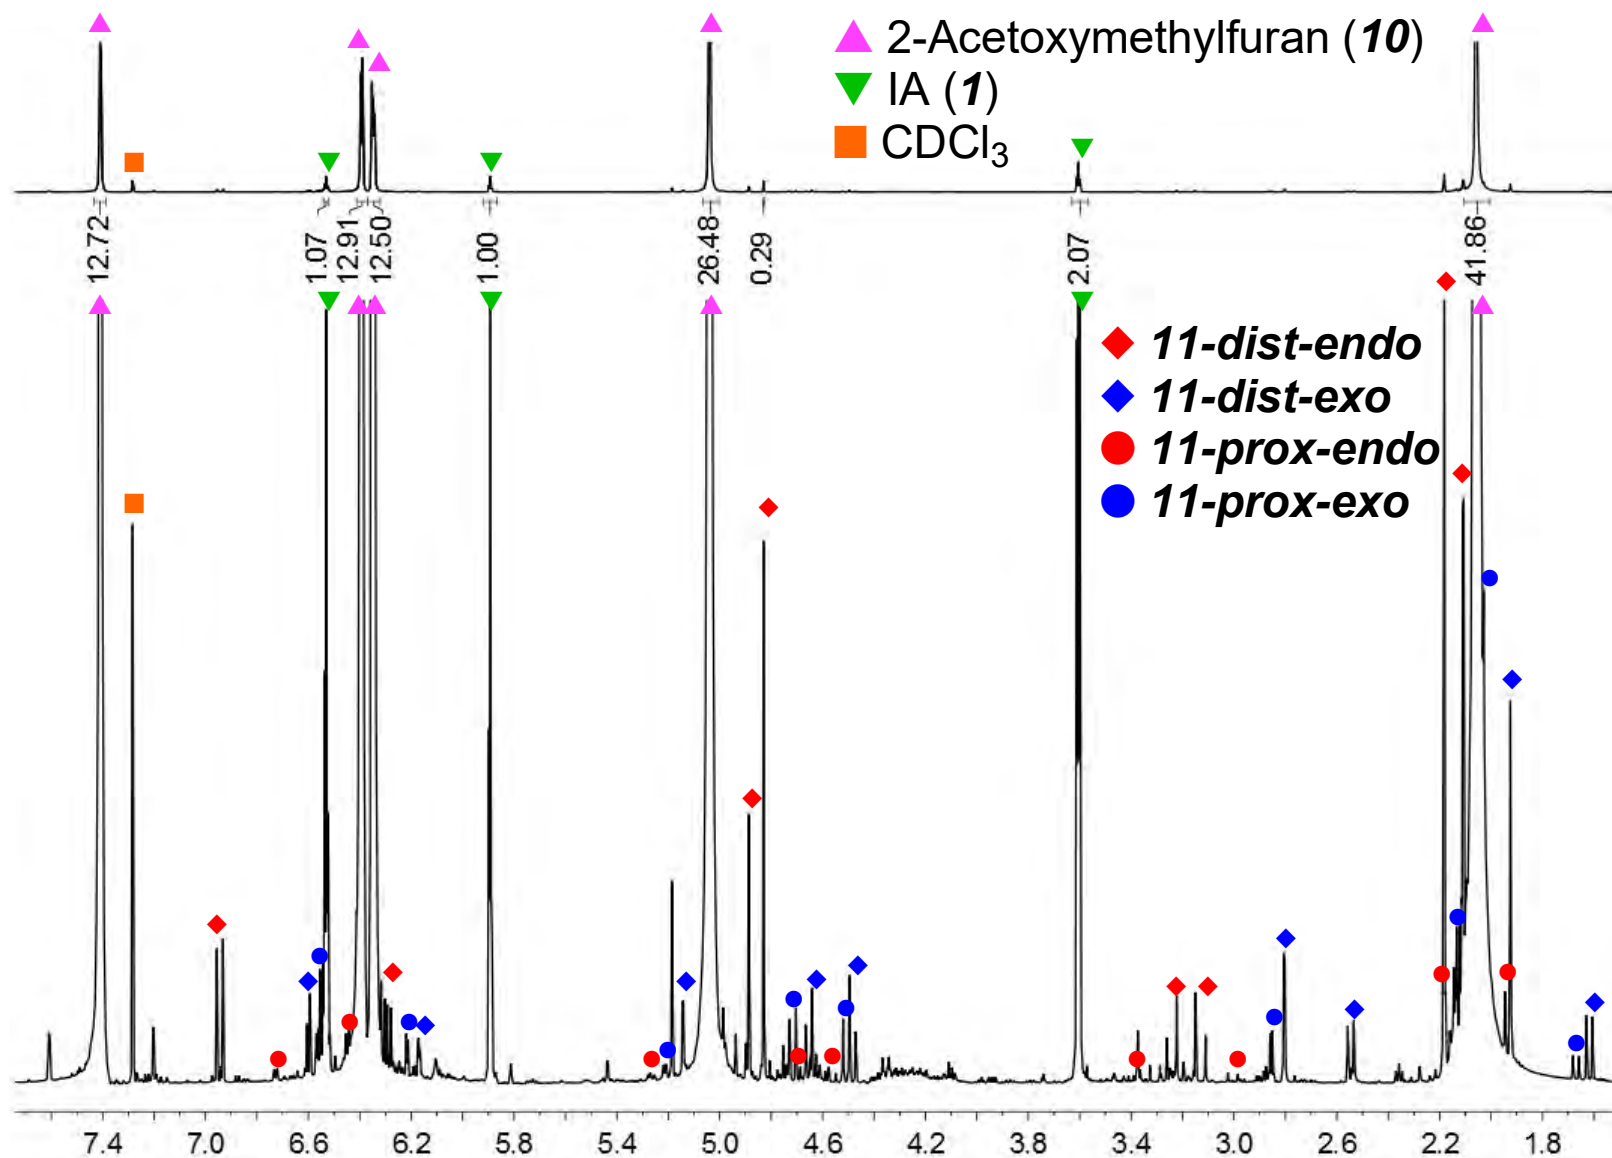

Figure S7. Entry 4 (from Table 1): Equilibrium state <sup>1</sup>H NMR spectrum for formation of 11-dist-endo, 11-dist-exo, 11-prox-endo, and 11-prox-exo.

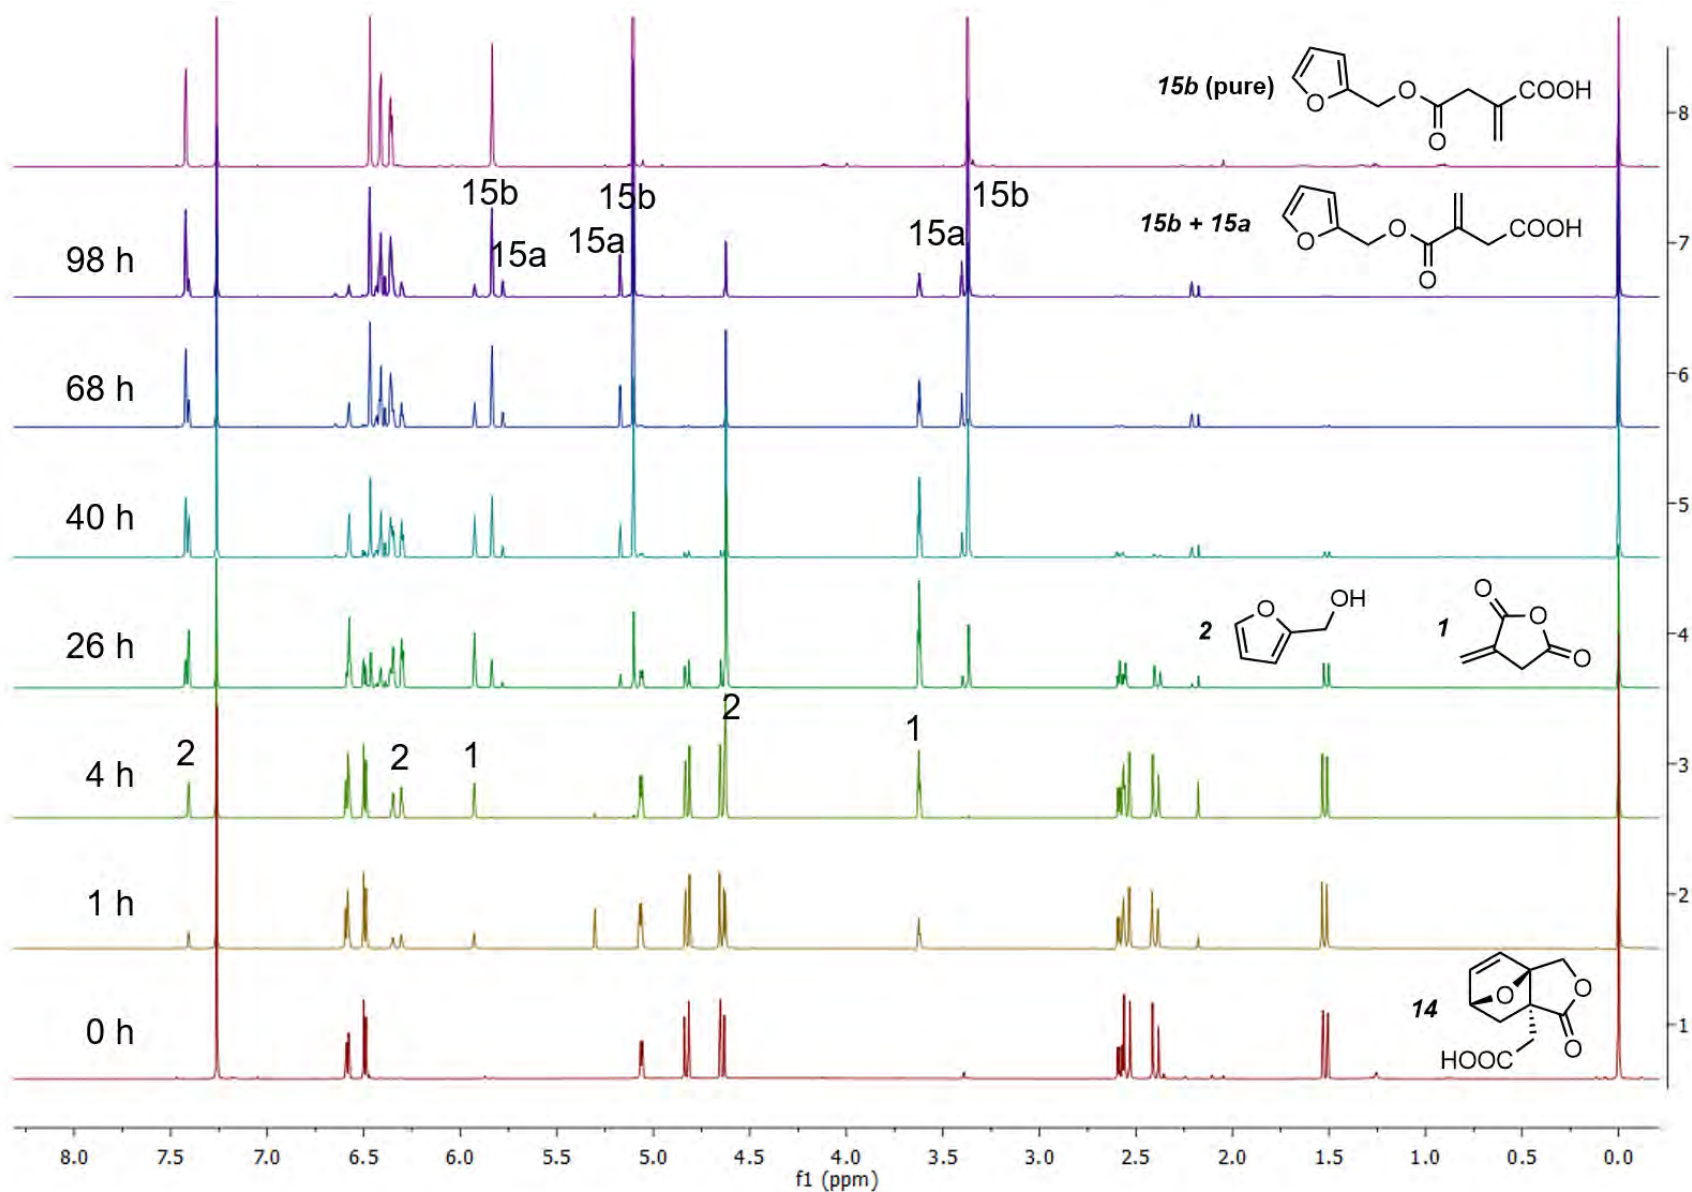

**Figure S8.** In situ  $^1\text{H}$  NMR monitoring of the reaction of **14** in  $\text{CDCl}_3$  to produce **15a** and **15b** via **1** and **2** (and, presumably, 12-prox-exo).

#### IV. Computational (DFT) methodology used and free energies and geometries for 13'/13, 14'/14, 13<sup>Me</sup>/13<sup>Me</sup>, and 14<sup>Me</sup>/14<sup>Me</sup>

Each of the isomeric methyl esters (and acids) 13<sup>Me</sup>, 13<sup>Me</sup>, 14<sup>Me</sup>, 14<sup>Me</sup> in Scheme 2b (and 13, 13', 14, 14'; data not in manuscript but provided here at the right) was subjected to a molecular mechanics multiconformational search in Macromodel (version 10.7). The resulting minima were each subjected to an M06-2X<sup>3</sup>/6-31+G(d,p) optimization calculation with a “tight” cutoff and an “ultrafine” integration grid in Gaussian 09<sup>4</sup>. This was followed by a frequency calculation (at 298 K) to obtain the Gibbs energy for each conformer. Solvation in chloroform was accounted for by using the SMD solvation model.<sup>5</sup> Each conformer was Boltzmann-weighted based on its Gibbs energy to obtain its mole fraction. The mole fractions of all conformers for each isomer were used to determine the overall (Boltzmann-averaged) Gibbs energy of that isomer.

Each of the isomeric, retro-Diels-Alder-derived mono-furfuryl itaconate methyl esters 15a<sup>Me</sup> and 15b<sup>Me</sup> was subjected to the above multi-conformer search. Sixty and sixty-one conformers, respectively, were found within 5.02 kcal/mol of the global minimum. The lowest twenty were subjected to the above DFT optimization. The resulting lowest energy conformer of each was 4.4 and 3.4 kcal/mol lower than the lowest isomeric methyl ester 13<sup>Me</sup>.

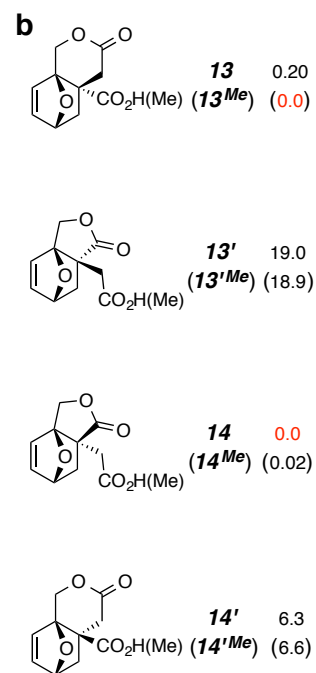

**Scheme 2b (from manuscript).**  
Computed free energies in kcal•mol<sup>-1</sup>.

#### Energies and geometries of various conformations of 13, 13<sup>Me</sup>, 14, and 14<sup>Me</sup>.

##### 13 (Conformer 1 of 6)

Sum of electronic and thermal Free Energies = -762.777288 Hartrees

| Center Number | Atomic Number | Atomic Type | Coordinates (Angstroms) |           |           |
|---------------|---------------|-------------|-------------------------|-----------|-----------|
|               |               |             | X                       | Y         | Z         |
| 1             | 6             | 0           | 2.144026                | -0.730685 | -1.002110 |
| 2             | 6             | 0           | 1.385458                | 0.585835  | -1.362283 |
| 3             | 6             | 0           | 0.168218                | 0.476010  | -0.398579 |
| 4             | 6             | 0           | 0.535126                | -0.817823 | 0.407673  |
| 5             | 6             | 0           | 1.784108                | -0.527455 | 1.232517  |
| 6             | 6             | 0           | 2.785967                | -0.488326 | 0.353116  |
| 7             | 8             | 0           | 1.061474                | -1.608559 | -0.661925 |
| 8             | 6             | 0           | -1.122443               | 0.180618  | -1.180254 |
| 9             | 6             | 0           | -2.232311               | -0.459266 | -0.378360 |
| 10            | 8             | 0           | -1.910533               | -1.333691 | 0.582631  |
| 11            | 6             | 0           | -0.597157               | -1.477470 | 1.150834  |
| 12            | 6             | 0           | -0.073740               | 1.656195  | 0.525374  |
| 13            | 8             | 0           | 0.048414                | 2.885556  | 0.004040  |

|    |   |   |           |           |           |
|----|---|---|-----------|-----------|-----------|
| 14 | 8 | 0 | -0.419407 | 1.526309  | 1.675788  |
| 15 | 8 | 0 | -3.400166 | -0.285967 | -0.641373 |
| 16 | 1 | 0 | 2.757126  | -1.154326 | -1.794805 |
| 17 | 1 | 0 | 1.059821  | 0.584349  | -2.405333 |
| 18 | 1 | 0 | 2.015775  | 1.461484  | -1.188302 |
| 19 | 1 | 0 | 1.788213  | -0.308119 | 2.292916  |
| 20 | 1 | 0 | 3.823514  | -0.223484 | 0.516871  |
| 21 | 1 | 0 | -0.880719 | -0.541438 | -1.968853 |
| 22 | 1 | 0 | -1.531957 | 1.071439  | -1.662470 |
| 23 | 1 | 0 | -0.653419 | -1.056001 | 2.156117  |
| 24 | 1 | 0 | -0.409106 | -2.551424 | 1.217549  |
| 25 | 1 | 0 | 0.328972  | 2.862540  | -0.924541 |

---

**13 (Conformer 2 of 6)**

Sum of electronic and thermal Free Energies = -762.784639 Hartrees

| Center<br>Number | Atomic<br>Number | Atomic<br>Type | Coordinates (Angstroms) |           |           |
|------------------|------------------|----------------|-------------------------|-----------|-----------|
|                  |                  |                | X                       | Y         | Z         |
| 1                | 6                | 0              | 0.867648                | -1.878273 | -0.851918 |
| 2                | 6                | 0              | 0.769497                | -0.525456 | -1.608324 |
| 3                | 6                | 0              | 0.290326                | 0.411557  | -0.474779 |
| 4                | 6                | 0              | 0.087226                | -0.632888 | 0.701839  |
| 5                | 6                | 0              | 1.478169                | -1.020993 | 1.178563  |
| 6                | 6                | 0              | 1.969281                | -1.778926 | 0.193377  |
| 7                | 8                | 0              | -0.308944               | -1.784694 | -0.036624 |
| 8                | 6                | 0              | -1.052595               | 1.132026  | -0.733916 |
| 9                | 6                | 0              | -2.276825               | 0.360273  | -0.286524 |
| 10               | 8                | 0              | -2.254074               | -0.176877 | 0.946469  |
| 11               | 6                | 0              | -1.007173               | -0.241150 | 1.659352  |
| 12               | 6                | 0              | 1.338877                | 1.450574  | -0.118107 |
| 13               | 8                | 0              | 1.069339                | 2.041335  | 1.060136  |
| 14               | 8                | 0              | 2.301870                | 1.747026  | -0.784582 |
| 15               | 8                | 0              | -3.288425               | 0.282286  | -0.942744 |
| 16               | 1                | 0              | 0.841247                | -2.770857 | -1.473919 |
| 17               | 1                | 0              | 0.009968                | -0.607393 | -2.389434 |
| 18               | 1                | 0              | 1.710983                | -0.197180 | -2.049510 |
| 19               | 1                | 0              | 1.971433                | -0.644808 | 2.066692  |
| 20               | 1                | 0              | 2.970166                | -2.180048 | 0.089128  |
| 21               | 1                | 0              | -1.179985               | 1.381698  | -1.787619 |
| 22               | 1                | 0              | -1.086646               | 2.067260  | -0.159692 |
| 23               | 1                | 0              | -0.790284               | 0.720419  | 2.133791  |
| 24               | 1                | 0              | -1.151942               | -1.003703 | 2.425874  |
| 25               | 1                | 0              | 1.760352                | 2.701537  | 1.246071  |

---

**13 (Conformer 3 of 6)**

Sum of electronic and thermal Free Energies = -762.784127 Hartrees

| Center | Atomic | Atomic | Coordinates (Angstroms) |  |  |
|--------|--------|--------|-------------------------|--|--|
|--------|--------|--------|-------------------------|--|--|

| Number | Number | Type | X         | Y         | Z         |
|--------|--------|------|-----------|-----------|-----------|
| 1      | 6      | 0    | -2.066676 | -1.047207 | 0.861213  |
| 2      | 6      | 0    | -1.396825 | 0.222903  | 1.475334  |
| 3      | 6      | 0    | -0.184507 | 0.393937  | 0.528438  |
| 4      | 6      | 0    | -0.471881 | -0.746294 | -0.530492 |
| 5      | 6      | 0    | -1.743480 | -0.383215 | -1.287199 |
| 6      | 6      | 0    | -2.737077 | -0.587271 | -0.421224 |
| 7      | 8      | 0    | -0.928322 | -1.765048 | 0.354882  |
| 8      | 6      | 0    | 1.133739  | 0.042376  | 1.229231  |
| 9      | 6      | 0    | 2.270151  | -0.381990 | 0.331126  |
| 10     | 8      | 0    | 1.985092  | -1.133743 | -0.746126 |
| 11     | 6      | 0    | 0.703471  | -1.129301 | -1.388111 |
| 12     | 6      | 0    | -0.014309 | 1.712263  | -0.189750 |
| 13     | 8      | 0    | -1.023472 | 2.574481  | -0.049546 |
| 14     | 8      | 0    | 0.966363  | 1.949233  | -0.864975 |
| 15     | 8      | 0    | 3.429878  | -0.194377 | 0.615964  |
| 16     | 1      | 0    | -2.640219 | -1.664047 | 1.549715  |
| 17     | 1      | 0    | -1.060713 | 0.031196  | 2.496795  |
| 18     | 1      | 0    | -2.071579 | 1.078756  | 1.479362  |
| 19     | 1      | 0    | -1.773420 | 0.045311  | -2.282285 |
| 20     | 1      | 0    | -3.790815 | -0.361566 | -0.531829 |
| 21     | 1      | 0    | 0.952881  | -0.820593 | 1.880039  |
| 22     | 1      | 0    | 1.488714  | 0.864243  | 1.854877  |
| 23     | 1      | 0    | 0.769038  | -0.428237 | -2.225660 |
| 24     | 1      | 0    | 0.557959  | -2.138056 | -1.780453 |
| 25     | 1      | 0    | -0.823811 | 3.371426  | -0.573553 |

### 13 (Conformer 4 of 6)

Sum of electronic and thermal Free Energies = -762.783754 Hartrees

| Center Number | Atomic Number | Atomic Type | Coordinates (Angstroms) |           |           |
|---------------|---------------|-------------|-------------------------|-----------|-----------|
|               |               |             | X                       | Y         | Z         |
| 1             | 6             | 0           | 0.769839                | -1.750158 | -1.160229 |
| 2             | 6             | 0           | 0.821673                | -0.268356 | -1.622932 |
| 3             | 6             | 0           | 0.333055                | 0.452726  | -0.333997 |
| 4             | 6             | 0           | 0.054265                | -0.775307 | 0.604316  |
| 5             | 6             | 0           | 1.397896                | -1.367267 | 1.002240  |
| 6             | 6             | 0           | 1.845849                | -1.963086 | -0.106207 |
| 7             | 8             | 0           | -0.417385               | -1.722576 | -0.355636 |
| 8             | 6             | 0           | -0.981021               | 1.259754  | -0.505014 |
| 9             | 6             | 0           | -2.244852               | 0.487047  | -0.184746 |
| 10            | 8             | 0           | -2.258414               | -0.238182 | 0.947494  |
| 11            | 6             | 0           | -1.018184               | -0.501883 | 1.625470  |
| 12            | 6             | 0           | 1.341969                | 1.410897  | 0.260047  |
| 13            | 8             | 0           | 1.861756                | 2.232866  | -0.660569 |

|    |   |   |           |           |           |
|----|---|---|-----------|-----------|-----------|
| 14 | 8 | 0 | 1.609813  | 1.494375  | 1.438401  |
| 15 | 8 | 0 | -3.254747 | 0.569333  | -0.842846 |
| 16 | 1 | 0 | 0.685136  | -2.489931 | -1.954225 |
| 17 | 1 | 0 | 0.118474  | -0.110102 | -2.443883 |
| 18 | 1 | 0 | 1.816210  | 0.048380  | -1.940530 |
| 19 | 1 | 0 | 1.894468  | -1.220488 | 1.952540  |
| 20 | 1 | 0 | 2.806761  | -2.433329 | -0.277120 |
| 21 | 1 | 0 | -1.078276 | 1.667515  | -1.511333 |
| 22 | 1 | 0 | -0.992799 | 2.106271  | 0.196584  |
| 23 | 1 | 0 | -0.741588 | 0.346446  | 2.260094  |
| 24 | 1 | 0 | -1.209890 | -1.377519 | 2.246830  |
| 25 | 1 | 0 | 2.450380  | 2.870028  | -0.217399 |

---

**13 (Conformer 5 of 6)**

Sum of electronic and thermal Free Energies = -762.785581 Hartrees

| Center<br>Number | Atomic<br>Number | Atomic<br>Type | Coordinates (Angstroms) |           |           |
|------------------|------------------|----------------|-------------------------|-----------|-----------|
|                  |                  |                | X                       | Y         | Z         |
| 1                | 6                | 0              | 2.146840                | -0.948312 | -0.840475 |
| 2                | 6                | 0              | 1.424886                | 0.283772  | -1.468036 |
| 3                | 6                | 0              | 0.200072                | 0.406852  | -0.533944 |
| 4                | 6                | 0              | 0.517471                | -0.721692 | 0.527993  |
| 5                | 6                | 0              | 1.759868                | -0.302052 | 1.304052  |
| 6                | 6                | 0              | 2.774229                | -0.456928 | 0.452064  |
| 7                | 8                | 0              | 1.034501                | -1.717758 | -0.351790 |
| 8                | 6                | 0              | -1.103467               | 0.017663  | -1.244874 |
| 9                | 6                | 0              | -2.230182               | -0.461273 | -0.361425 |
| 10               | 8                | 0              | -1.929612               | -1.198162 | 0.719993  |
| 11               | 6                | 0              | -0.647632               | -1.180558 | 1.363834  |
| 12               | 6                | 0              | 0.057778                | 1.757500  | 0.131462  |
| 13               | 8                | 0              | -1.044062               | 1.788042  | 0.902727  |
| 14               | 8                | 0              | 0.809632                | 2.696812  | 0.026405  |
| 15               | 8                | 0              | -3.393584               | -0.315280 | -0.657065 |
| 16               | 1                | 0              | 2.760232                | -1.538932 | -1.517529 |
| 17               | 1                | 0              | 1.110450                | 0.070794  | -2.492081 |
| 18               | 1                | 0              | 2.048742                | 1.178231  | -1.463463 |
| 19               | 1                | 0              | 1.755981                | 0.129375  | 2.298329  |
| 20               | 1                | 0              | 3.813778                | -0.179791 | 0.578510  |
| 21               | 1                | 0              | -0.887161               | -0.828779 | -1.906866 |
| 22               | 1                | 0              | -1.486339               | 0.832060  | -1.864141 |
| 23               | 1                | 0              | -0.742002               | -0.525070 | 2.234098  |
| 24               | 1                | 0              | -0.466346               | -2.201451 | 1.707186  |
| 25               | 1                | 0              | -1.121517               | 2.664504  | 1.319894  |

---

**13 (Conformer 6 of 6)**

Sum of electronic and thermal Free Energies = -762.784620 Hartrees

| Center | Atomic | Atomic | Coordinates (Angstroms) |  |  |
|--------|--------|--------|-------------------------|--|--|
|--------|--------|--------|-------------------------|--|--|

| Number | Number | Type | X         | Y         | Z         |
|--------|--------|------|-----------|-----------|-----------|
| 1      | 6      | 0    | 2.173274  | -0.744108 | -0.956738 |
| 2      | 6      | 0    | 1.401398  | 0.544660  | -1.372682 |
| 3      | 6      | 0    | 0.175560  | 0.451145  | -0.425756 |
| 4      | 6      | 0    | 0.537817  | -0.815518 | 0.424755  |
| 5      | 6      | 0    | 1.766425  | -0.481431 | 1.264829  |
| 6      | 6      | 0    | 2.784172  | -0.450863 | 0.403153  |
| 7      | 8      | 0    | 1.097183  | -1.630487 | -0.608491 |
| 8      | 6      | 0    | -1.108450 | 0.133599  | -1.207818 |
| 9      | 6      | 0    | -2.225405 | -0.466765 | -0.387125 |
| 10     | 8      | 0    | -1.911755 | -1.328179 | 0.589445  |
| 11     | 6      | 0    | -0.601437 | -1.468287 | 1.164962  |
| 12     | 6      | 0    | -0.094921 | 1.649596  | 0.452883  |
| 13     | 8      | 0    | 0.197469  | 2.815866  | -0.130236 |
| 14     | 8      | 0    | -0.588961 | 1.568325  | 1.557117  |
| 15     | 8      | 0    | -3.392832 | -0.278785 | -0.643401 |
| 16     | 1      | 0    | 2.809699  | -1.185922 | -1.720699 |
| 17     | 1      | 0    | 1.087559  | 0.498178  | -2.417913 |
| 18     | 1      | 0    | 1.995199  | 1.447123  | -1.224024 |
| 19     | 1      | 0    | 1.747551  | -0.231990 | 2.318783  |
| 20     | 1      | 0    | 3.813896  | -0.163775 | 0.578843  |
| 21     | 1      | 0    | -0.864234 | -0.619325 | -1.966313 |
| 22     | 1      | 0    | -1.500779 | 1.012889  | -1.723415 |
| 23     | 1      | 0    | -0.665732 | -1.040029 | 2.167124  |
| 24     | 1      | 0    | -0.413865 | -2.541736 | 1.242819  |
| 25     | 1      | 0    | -0.068727 | 3.538494  | 0.466548  |

### $^{13}\text{Me}$ (Conformer 1 of 4)

Sum of electronic and thermal Free Energies = -802.038098 Hartrees

| Center Number | Atomic Number | Atomic Type | Coordinates (Angstroms) |           |           |
|---------------|---------------|-------------|-------------------------|-----------|-----------|
|               |               |             | X                       | Y         | Z         |
| 1             | 6             | 0           | 0.514280                | 1.976663  | -1.175480 |
| 2             | 6             | 0           | -0.299965               | 0.729778  | -1.616299 |
| 3             | 6             | 0           | -0.240060               | -0.127861 | -0.320500 |
| 4             | 6             | 0           | 0.647852                | 0.787119  | 0.597417  |
| 5             | 6             | 0           | -0.192244               | 1.990454  | 0.996881  |
| 6             | 6             | 0           | -0.283463               | 2.722986  | -0.116521 |
| 7             | 8             | 0           | 1.527714                | 1.347398  | -0.379301 |
| 8             | 6             | 0           | 0.468119                | -1.497579 | -0.486919 |
| 9             | 6             | 0           | 1.955438                | -1.481186 | -0.197068 |
| 10            | 8             | 0           | 2.359926                | -0.859753 | 0.924864  |
| 11            | 6             | 0           | 1.441560                | 0.007569  | 1.612388  |
| 12            | 6             | 0           | -1.591667               | -0.419917 | 0.300052  |
| 13            | 8             | 0           | -2.481352               | -0.822824 | -0.608404 |

|    |   |   |           |           |           |
|----|---|---|-----------|-----------|-----------|
| 14 | 8 | 0 | -1.827788 | -0.371187 | 1.489038  |
| 15 | 8 | 0 | 2.767700  | -2.073696 | -0.867433 |
| 16 | 1 | 0 | 0.958069  | 2.560406  | -1.979848 |
| 17 | 1 | 0 | 0.211402  | 0.224231  | -2.438887 |
| 18 | 1 | 0 | -1.318834 | 0.967387  | -1.924761 |
| 19 | 1 | 0 | -0.683420 | 2.126447  | 1.951630  |
| 20 | 1 | 0 | -0.867685 | 3.619191  | -0.287419 |
| 21 | 1 | 0 | 0.320900  | -1.912390 | -1.484270 |
| 22 | 1 | 0 | 0.058303  | -2.218118 | 0.235185  |
| 23 | 1 | 0 | 0.777262  | -0.574545 | 2.259309  |
| 24 | 1 | 0 | 2.065622  | 0.662805  | 2.221338  |
| 25 | 6 | 0 | -3.762757 | -1.226658 | -0.101622 |
| 26 | 1 | 0 | -4.243069 | -0.394442 | 0.416439  |
| 27 | 1 | 0 | -4.343369 | -1.518485 | -0.974933 |
| 28 | 1 | 0 | -3.647341 | -2.070190 | 0.582126  |

**13<sup>Me</sup> (Conformer 2 of 4)**

Sum of electronic and thermal Free Energies = -802.040411 Hartrees

| Center<br>Number | Atomic<br>Number | Atomic<br>Type | Coordinates (Angstroms) |           |           |
|------------------|------------------|----------------|-------------------------|-----------|-----------|
|                  |                  |                | X                       | Y         | Z         |
| 1                | 6                | 0              | 2.608151                | -0.460791 | -0.531219 |
| 2                | 6                | 0              | 1.597342                | 0.244909  | -1.486398 |
| 3                | 6                | 0              | 0.293552                | 0.126703  | -0.665021 |
| 4                | 6                | 0              | 0.834296                | -0.533817 | 0.663929  |
| 5                | 6                | 0              | 1.745951                | 0.474530  | 1.352171  |
| 6                | 6                | 0              | 2.854764                | 0.508270  | 0.611691  |
| 7                | 8                | 0              | 1.772539                | -1.447741 | 0.097540  |
| 8                | 6                | 0              | -0.692318               | -0.863054 | -1.299797 |
| 9                | 6                | 0              | -1.706224               | -1.476780 | -0.365389 |
| 10               | 8                | 0              | -1.321950               | -1.785892 | 0.883411  |
| 11               | 6                | 0              | -0.200590               | -1.182766 | 1.544902  |
| 12               | 6                | 0              | -0.391474               | 1.448939  | -0.386885 |
| 13               | 8                | 0              | -1.503235               | 1.247558  | 0.333697  |
| 14               | 8                | 0              | -0.014497               | 2.542489  | -0.739447 |
| 15               | 8                | 0              | -2.809123               | -1.813286 | -0.730648 |
| 16               | 1                | 0              | 3.469568                | -0.926189 | -1.005540 |
| 17               | 1                | 0              | 1.510309                | -0.296604 | -2.431025 |
| 18               | 1                | 0              | 1.872101                | 1.280207  | -1.691240 |
| 19               | 1                | 0              | 1.466301                | 1.090655  | 2.198966  |
| 20               | 1                | 0              | 3.710515                | 1.166152  | 0.702687  |
| 21               | 1                | 0              | -0.117356               | -1.710185 | -1.691831 |
| 22               | 1                | 0              | -1.234981               | -0.415197 | -2.135290 |
| 23               | 1                | 0              | -0.607969               | -0.432536 | 2.227914  |
| 24               | 1                | 0              | 0.270335                | -1.975910 | 2.130040  |
| 25               | 6                | 0              | -2.267230               | 2.414977  | 0.671892  |
| 26               | 1                | 0              | -3.133229               | 2.048967  | 1.220396  |
| 27               | 1                | 0              | -1.671937               | 3.085492  | 1.295311  |
| 28               | 1                | 0              | -2.580842               | 2.933413  | -0.236068 |



**13<sup>Me</sup> (Conformer 3 of 4)**

Sum of electronic and thermal Free Energies = -802.038896 Hartrees

| Center<br>Number | Atomic<br>Number | Atomic<br>Type | Coordinates (Angstroms) |           |           |
|------------------|------------------|----------------|-------------------------|-----------|-----------|
|                  |                  |                | X                       | Y         | Z         |
| 1                | 6                | 0              | 1.049400                | -2.215313 | -0.762012 |
| 2                | 6                | 0              | 1.023416                | -0.859601 | -1.537074 |
| 3                | 6                | 0              | 0.120481                | -0.013077 | -0.607110 |
| 4                | 6                | 0              | -0.088877               | -1.018989 | 0.595508  |
| 5                | 6                | 0              | 1.257007                | -1.233900 | 1.275967  |
| 6                | 6                | 0              | 1.958131                | -1.994792 | 0.434433  |
| 7                | 8                | 0              | -0.248853               | -2.226826 | -0.144145 |
| 8                | 6                | 0              | -1.255925               | 0.238141  | -1.234090 |
| 9                | 6                | 0              | -2.383961               | 0.519638  | -0.271979 |
| 10               | 8                | 0              | -2.403283               | -0.134136 | 0.901936  |
| 11               | 6                | 0              | -1.230381               | -0.683548 | 1.515941  |
| 12               | 6                | 0              | 0.659008                | 1.295445  | -0.072120 |
| 13               | 8                | 0              | 1.950513                | 1.509325  | -0.304702 |
| 14               | 8                | 0              | -0.046165               | 2.062939  | 0.553681  |
| 15               | 8                | 0              | -3.338146               | 1.199990  | -0.569799 |
| 16               | 1                | 0              | 1.200352                | -3.107947 | -1.365406 |
| 17               | 1                | 0              | 0.556247                | -0.980223 | -2.517019 |
| 18               | 1                | 0              | 2.022568                | -0.445081 | -1.669150 |
| 19               | 1                | 0              | 1.569290                | -0.760221 | 2.199567  |
| 20               | 1                | 0              | 2.996164                | -2.298098 | 0.498002  |
| 21               | 1                | 0              | -1.560812               | -0.669945 | -1.766417 |
| 22               | 1                | 0              | -1.224220               | 1.054483  | -1.959085 |
| 23               | 1                | 0              | -0.883066               | 0.047892  | 2.251878  |
| 24               | 1                | 0              | -1.556323               | -1.585307 | 2.038856  |
| 25               | 6                | 0              | 2.497983                | 2.709878  | 0.263250  |
| 26               | 1                | 0              | 2.398802                | 2.689183  | 1.350563  |
| 27               | 1                | 0              | 3.547556                | 2.716461  | -0.024791 |
| 28               | 1                | 0              | 1.983232                | 3.585176  | -0.137046 |

**13<sup>Me</sup> (Conformer 4 of 4)**

Sum of electronic and thermal Free Energies = -802.038758 Hartrees

| Center<br>Number | Atomic<br>Number | Atomic<br>Type | Coordinates (Angstroms) |           |           |
|------------------|------------------|----------------|-------------------------|-----------|-----------|
|                  |                  |                | X                       | Y         | Z         |
| 1                | 6                | 0              | 0.472896                | 2.314282  | -0.467567 |
| 2                | 6                | 0              | 0.071656                | 1.245041  | -1.519575 |
| 3                | 6                | 0              | -0.123369               | 0.002885  | -0.618642 |
| 4                | 6                | 0              | 0.338110                | 0.584780  | 0.782695  |
| 5                | 6                | 0              | -0.782359               | 1.495105  | 1.259960  |
| 6                | 6                | 0              | -0.709111               | 2.562514  | 0.458767  |
| 7                | 8                | 0              | 1.328481                | 1.521310  | 0.367245  |
| 8                | 6                | 0              | 0.767827                | -1.210395 | -0.966808 |
| 9                | 6                | 0              | 2.119608                | -1.211406 | -0.283350 |

|    |   |   |           |           |           |
|----|---|---|-----------|-----------|-----------|
| 10 | 8 | 0 | 2.143491  | -0.971293 | 1.040431  |
| 11 | 6 | 0 | 0.963809  | -0.452104 | 1.677553  |
| 12 | 6 | 0 | -1.577481 | -0.442944 | -0.579385 |
| 13 | 8 | 0 | -1.795684 | -1.296480 | 0.430247  |
| 14 | 8 | 0 | -2.445576 | -0.093004 | -1.345516 |
| 15 | 8 | 0 | 3.149986  | -1.497842 | -0.846072 |
| 16 | 1 | 0 | 1.001510  | 3.183329  | -0.854559 |
| 17 | 1 | 0 | 0.905050  | 1.094662  | -2.209861 |
| 18 | 1 | 0 | -0.827551 | 1.495383  | -2.083070 |
| 19 | 1 | 0 | -1.531299 | 1.243205  | 2.001387  |
| 20 | 1 | 0 | -1.388943 | 3.403665  | 0.396035  |
| 21 | 1 | 0 | 0.935008  | -1.294628 | -2.041033 |
| 22 | 1 | 0 | 0.280155  | -2.133425 | -0.626840 |
| 23 | 1 | 0 | 0.259452  | -1.261163 | 1.891623  |
| 24 | 1 | 0 | 1.312012  | -0.009204 | 2.611735  |
| 25 | 6 | 0 | -3.141133 | -1.775283 | 0.571609  |
| 26 | 1 | 0 | -3.458184 | -2.287826 | -0.338623 |
| 27 | 1 | 0 | -3.119975 | -2.468577 | 1.410848  |
| 28 | 1 | 0 | -3.815531 | -0.941802 | 0.780131  |

---

**13' (Conformer 1 of 8)**

Sum of electronic and thermal Free Energies = -762.751344 Hartrees

| Center<br>Number | Atomic<br>Number | Atomic<br>Type | Coordinates (Angstroms) |           |           |
|------------------|------------------|----------------|-------------------------|-----------|-----------|
|                  |                  |                | X                       | Y         | Z         |
| 1                | 6                | 0              | -2.384903               | -0.994147 | 0.556131  |
| 2                | 6                | 0              | -1.314324               | -0.421169 | 1.570441  |
| 3                | 6                | 0              | -0.196862               | -0.034986 | 0.584237  |
| 4                | 6                | 0              | -0.962283               | -0.175205 | -0.775007 |
| 5                | 6                | 0              | -2.146418               | 0.791996  | -0.789446 |
| 6                | 6                | 0              | -3.063409               | 0.242659  | 0.003821  |
| 7                | 8                | 0              | -1.589321               | -1.428141 | -0.582899 |
| 8                | 6                | 0              | 0.119003                | 0.202829  | -1.762175 |
| 9                | 8                | 0              | 0.715458                | 1.327620  | -1.035609 |
| 10               | 6                | 0              | 0.394945                | 1.324871  | 0.303165  |
| 11               | 6                | 0              | 0.952069                | -1.085580 | 0.723184  |
| 12               | 6                | 0              | 2.300749                | -0.765237 | 0.117625  |
| 13               | 8                | 0              | 2.811900                | -1.353574 | -0.809075 |
| 14               | 8                | 0              | 2.913021                | 0.234279  | 0.766590  |
| 15               | 8                | 0              | 0.593748                | 2.282844  | 0.997012  |
| 16               | 1                | 0              | -3.000818               | -1.813316 | 0.920036  |
| 17               | 1                | 0              | -0.971279               | -1.188714 | 2.265614  |
| 18               | 1                | 0              | -1.719646               | 0.415000  | 2.142176  |
| 19               | 1                | 0              | -2.157223               | 1.741469  | -1.312378 |
| 20               | 1                | 0              | -4.025612               | 0.628122  | 0.317928  |
| 21               | 1                | 0              | -0.246209               | 0.597457  | -2.710458 |
| 22               | 1                | 0              | 0.865372                | -0.573272 | -1.938048 |
| 23               | 1                | 0              | 1.138081                | -1.213172 | 1.793508  |
| 24               | 1                | 0              | 0.605777                | -2.036680 | 0.313386  |
| 25               | 1                | 0              | 3.761707                | 0.422692  | 0.328230  |

---

**13' (Conformer 2 of 8)**

Sum of electronic and thermal Free Energies = -762.754428 Hartrees

| Center Number | Atomic Number | Atomic Type | Coordinates (Angstroms) |           |           |
|---------------|---------------|-------------|-------------------------|-----------|-----------|
|               |               |             | X                       | Y         | Z         |
| 1             | 6             | 0           | -1.350235               | -1.887631 | 0.347953  |
| 2             | 6             | 0           | -0.067002               | -1.217901 | 0.988187  |
| 3             | 6             | 0           | 0.040855                | 0.034809  | 0.101738  |
| 4             | 6             | 0           | -1.335511               | -0.020592 | -0.642935 |
| 5             | 6             | 0           | -2.463503               | 0.067813  | 0.384545  |
| 6             | 6             | 0           | -2.505239               | -1.128545 | 0.967555  |
| 7             | 8             | 0           | -1.364324               | -1.383720 | -1.018014 |
| 8             | 6             | 0           | -1.238601               | 1.206207  | -1.524636 |
| 9             | 8             | 0           | -0.649284               | 2.136366  | -0.565508 |
| 10            | 6             | 0           | -0.034018               | 1.494591  | 0.487394  |
| 11            | 6             | 0           | 1.206461                | -0.139437 | -0.904165 |
| 12            | 6             | 0           | 2.533140                | -0.418277 | -0.240474 |
| 13            | 8             | 0           | 3.365938                | -1.184484 | -0.670388 |
| 14            | 8             | 0           | 2.713204                | 0.304342  | 0.871159  |
| 15            | 8             | 0           | 0.315467                | 2.102782  | 1.460035  |
| 16            | 1             | 0           | -1.374489               | -2.974919 | 0.349274  |
| 17            | 1             | 0           | 0.809709                | -1.860294 | 0.875807  |
| 18            | 1             | 0           | -0.213263               | -1.012205 | 2.049440  |
| 19            | 1             | 0           | -3.037267               | 0.963351  | 0.593786  |
| 20            | 1             | 0           | -3.115997               | -1.472113 | 1.793440  |
| 21            | 1             | 0           | -2.196802               | 1.626622  | -1.829904 |
| 22            | 1             | 0           | -0.585204               | 1.090313  | -2.391512 |
| 23            | 1             | 0           | 0.992210                | -0.973836 | -1.575142 |
| 24            | 1             | 0           | 1.362500                | 0.759037  | -1.513291 |
| 25            | 1             | 0           | 3.592514                | 0.105540  | 1.238852  |

**13' (Conformer 3 of 8)**

Sum of electronic and thermal Free Energies = -762.753457 Hartrees

| Center Number | Atomic Number | Atomic Type | Coordinates (Angstroms) |           |           |
|---------------|---------------|-------------|-------------------------|-----------|-----------|
|               |               |             | X                       | Y         | Z         |
| 1             | 6             | 0           | -1.825136               | -1.652694 | -0.102030 |
| 2             | 6             | 0           | -0.436835               | -1.490739 | 0.644480  |
| 3             | 6             | 0           | -0.007514               | -0.123888 | 0.080055  |
| 4             | 6             | 0           | -1.341693               | 0.348544  | -0.579430 |
| 5             | 6             | 0           | -2.432459               | 0.428720  | 0.488522  |
| 6             | 6             | 0           | -2.779779               | -0.831908 | 0.738471  |
| 7             | 8             | 0           | -1.690375               | -0.823217 | -1.292990 |
| 8             | 6             | 0           | -0.961302               | 1.715674  | -1.109758 |
| 9             | 8             | 0           | -0.148424               | 2.185980  | 0.009493  |
| 10            | 6             | 0           | 0.321461                | 1.165611  | 0.795631  |
| 11            | 6             | 0           | 1.113977                | -0.319191 | -0.977098 |
| 12            | 6             | 0           | 2.482724                | -0.485121 | -0.352966 |
| 13            | 8             | 0           | 3.456361                | 0.156202  | -0.676758 |

|    |   |   |           |           |           |
|----|---|---|-----------|-----------|-----------|
| 14 | 8 | 0 | 2.525587  | -1.427978 | 0.598393  |
| 15 | 8 | 0 | 0.919656  | 1.386209  | 1.814206  |
| 16 | 1 | 0 | -2.105518 | -2.666227 | -0.379529 |
| 17 | 1 | 0 | 0.269366  | -2.270464 | 0.363335  |
| 18 | 1 | 0 | -0.567172 | -1.513928 | 1.727143  |
| 19 | 1 | 0 | -2.775632 | 1.348840  | 0.947269  |
| 20 | 1 | 0 | -3.475464 | -1.224108 | 1.470140  |
| 21 | 1 | 0 | -1.797116 | 2.407797  | -1.209242 |
| 22 | 1 | 0 | -0.370553 | 1.712870  | -2.026748 |
| 23 | 1 | 0 | 0.884428  | -1.211769 | -1.567641 |
| 24 | 1 | 0 | 1.206008  | 0.524519  | -1.660833 |
| 25 | 1 | 0 | 3.428548  | -1.455144 | 0.962093  |

**13' (Conformer 4 of 8)**

Sum of electronic and thermal Free Energies = -762.754441 Hartrees

| Center Number | Atomic Number | Atomic Type | Coordinates (Angstroms) |           |           |
|---------------|---------------|-------------|-------------------------|-----------|-----------|
|               |               |             | X                       | Y         | Z         |
| 1             | 6             | 0           | -1.686320               | -1.730767 | 0.144242  |
| 2             | 6             | 0           | -0.303458               | -1.377575 | 0.834130  |
| 3             | 6             | 0           | 0.018654                | -0.069899 | 0.091904  |
| 4             | 6             | 0           | -1.350635               | 0.216506  | -0.606671 |
| 5             | 6             | 0           | -2.434716               | 0.366818  | 0.459792  |
| 6             | 6             | 0           | -2.686370               | -0.869170 | 0.886329  |
| 7             | 8             | 0           | -1.622783               | -1.061288 | -1.148293 |
| 8             | 6             | 0           | -1.055107               | 1.516612  | -1.325821 |
| 9             | 8             | 0           | -0.278152               | 2.190601  | -0.287999 |
| 10            | 6             | 0           | 0.236191                | 1.319667  | 0.641511  |
| 11            | 6             | 0           | 1.134155                | -0.337359 | -0.960457 |
| 12            | 6             | 0           | 2.441550                | -0.639090 | -0.268024 |
| 13            | 8             | 0           | 2.832005                | -1.744190 | 0.036545  |
| 14            | 8             | 0           | 3.135225                | 0.475542  | -0.003414 |
| 15            | 8             | 0           | 0.743181                | 1.715426  | 1.655008  |
| 16            | 1             | 0           | -1.898954               | -2.788757 | 0.010502  |
| 17            | 1             | 0           | 0.454613                | -2.137029 | 0.638458  |
| 18            | 1             | 0           | -0.420799               | -1.268207 | 1.913106  |
| 19            | 1             | 0           | -2.835625               | 1.315274  | 0.798254  |
| 20            | 1             | 0           | -3.342907               | -1.204965 | 1.679634  |
| 21            | 1             | 0           | -1.931222               | 2.135674  | -1.519817 |
| 22            | 1             | 0           | -0.461526               | 1.413500  | -2.235353 |
| 23            | 1             | 0           | 0.845989                | -1.206425 | -1.554008 |
| 24            | 1             | 0           | 1.291308                | 0.519970  | -1.618139 |
| 25            | 1             | 0           | 3.939655                | 0.237764  | 0.490979  |

**13' (Conformer 5 of 8)**

Sum of electronic and thermal Free Energies = -762.755097 Hartrees

| Center | Atomic | Atomic | Coordinates (Angstroms) |  |  |
|--------|--------|--------|-------------------------|--|--|
|--------|--------|--------|-------------------------|--|--|

| Number | Number | Type | X         | Y         | Z         |
|--------|--------|------|-----------|-----------|-----------|
| 1      | 6      | 0    | -0.098123 | 2.060591  | 0.275677  |
| 2      | 6      | 0    | 0.069823  | 1.004592  | 1.444327  |
| 3      | 6      | 0    | 0.297508  | -0.259581 | 0.604613  |
| 4      | 6      | 0    | 0.534886  | 0.356265  | -0.808663 |
| 5      | 6      | 0    | 1.745134  | 1.287120  | -0.761859 |
| 6      | 6      | 0    | 1.326132  | 2.382015  | -0.129792 |
| 7      | 8      | 0    | -0.550852 | 1.265303  | -0.857868 |
| 8      | 6      | 0    | 0.772658  | -0.893730 | -1.630432 |
| 9      | 8      | 0    | 1.631565  | -1.622887 | -0.696019 |
| 10     | 6      | 0    | 1.475448  | -1.203960 | 0.599714  |
| 11     | 6      | 0    | -0.948876 | -1.197277 | 0.654697  |
| 12     | 6      | 0    | -2.195717 | -0.636080 | 0.007411  |
| 13     | 8      | 0    | -2.619319 | -0.990085 | -1.069590 |
| 14     | 8      | 0    | -2.830950 | 0.261208  | 0.775160  |
| 15     | 8      | 0    | 2.183717  | -1.611351 | 1.480818  |
| 16     | 1      | 0    | -0.791401 | 2.877578  | 0.461811  |
| 17     | 1      | 0    | -0.833685 | 0.919494  | 2.047811  |
| 18     | 1      | 0    | 0.908143  | 1.267645  | 2.090825  |
| 19     | 1      | 0    | 2.731663  | 1.033553  | -1.132429 |
| 20     | 1      | 0    | 1.884128  | 3.261751  | 0.166747  |
| 21     | 1      | 0    | 1.351736  | -0.743591 | -2.541286 |
| 22     | 1      | 0    | -0.129802 | -1.471587 | -1.840578 |
| 23     | 1      | 0    | -0.747535 | -2.150200 | 0.160751  |
| 24     | 1      | 0    | -1.155793 | -1.401311 | 1.709276  |
| 25     | 1      | 0    | -3.603983 | 0.589436  | 0.282898  |

**13' (Conformer 6 of 8)**

Sum of electronic and thermal Free Energies = -762.755288 Hartrees

| Center Number | Atomic Number | Atomic Type | Coordinates (Angstroms) |           |           |
|---------------|---------------|-------------|-------------------------|-----------|-----------|
|               |               |             | X                       | Y         | Z         |
| 1             | 6             | 0           | 0.092418                | 2.057538  | -0.309142 |
| 2             | 6             | 0           | -0.072666               | 0.982838  | -1.460880 |
| 3             | 6             | 0           | -0.299397               | -0.268790 | -0.601111 |
| 4             | 6             | 0           | -0.534813               | 0.368307  | 0.802240  |
| 5             | 6             | 0           | -1.748339               | 1.294821  | 0.740465  |
| 6             | 6             | 0           | -1.332471               | 2.380940  | 0.091327  |
| 7             | 8             | 0           | 0.547729                | 1.281210  | 0.837208  |
| 8             | 6             | 0           | -0.771378               | -0.866267 | 1.647203  |
| 9             | 8             | 0           | -1.623690               | -1.617848 | 0.725856  |
| 10            | 6             | 0           | -1.469027               | -1.223029 | -0.578063 |
| 11            | 6             | 0           | 0.954917                | -1.194173 | -0.653621 |
| 12            | 6             | 0           | 2.224218                | -0.524190 | -0.176422 |
| 13            | 8             | 0           | 2.918042                | 0.207695  | -0.845542 |

|    |   |   |           |           |           |
|----|---|---|-----------|-----------|-----------|
| 14 | 8 | 0 | 2.534086  | -0.869528 | 1.081720  |
| 15 | 8 | 0 | -2.170967 | -1.656736 | -1.451463 |
| 16 | 1 | 0 | 0.784497  | 2.872129  | -0.509088 |
| 17 | 1 | 0 | 0.835156  | 0.888531  | -2.057430 |
| 18 | 1 | 0 | -0.908262 | 1.235351  | -2.114868 |
| 19 | 1 | 0 | -2.734532 | 1.044051  | 1.113910  |
| 20 | 1 | 0 | -1.893164 | 3.253893  | -0.219820 |
| 21 | 1 | 0 | -1.354091 | -0.698823 | 2.552867  |
| 22 | 1 | 0 | 0.130635  | -1.437950 | 1.873849  |
| 23 | 1 | 0 | 0.801727  | -2.110686 | -0.079331 |
| 24 | 1 | 0 | 1.101232  | -1.469994 | -1.701062 |
| 25 | 1 | 0 | 3.334434  | -0.382820 | 1.346757  |

**13' (Conformer 7 of 8)**

Sum of electronic and thermal Free Energies = -762.755259 Hartrees

| Center Number | Atomic Number | Atomic Type | Coordinates (Angstroms) |           |           |
|---------------|---------------|-------------|-------------------------|-----------|-----------|
|               |               |             | X                       | Y         | Z         |
| 1             | 6             | 0           | -1.527568               | -1.843759 | 0.136784  |
| 2             | 6             | 0           | -0.237272               | -1.332486 | 0.894691  |
| 3             | 6             | 0           | 0.003574                | -0.015232 | 0.136487  |
| 4             | 6             | 0           | -1.330278               | 0.099550  | -0.671225 |
| 5             | 6             | 0           | -2.501236               | 0.176735  | 0.307664  |
| 6             | 6             | 0           | -2.658681               | -1.061744 | 0.770332  |
| 7             | 8             | 0           | -1.433877               | -1.218003 | -1.176284 |
| 8             | 6             | 0           | -1.113540               | 1.392548  | -1.427616 |
| 9             | 8             | 0           | -0.499588               | 2.184505  | -0.365660 |
| 10            | 6             | 0           | 0.030381                | 1.408933  | 0.642168  |
| 11            | 6             | 0           | 1.213745                | -0.173918 | -0.806969 |
| 12            | 6             | 0           | 2.502191                | -0.410161 | -0.055785 |
| 13            | 8             | 0           | 2.630415                | -0.457048 | 1.144834  |
| 14            | 8             | 0           | 3.532454                | -0.561227 | -0.903640 |
| 15            | 8             | 0           | 0.421329                | 1.906870  | 1.661123  |
| 16            | 1             | 0           | -1.628619               | -2.921732 | 0.033627  |
| 17            | 1             | 0           | 0.601276                | -2.017014 | 0.762655  |
| 18            | 1             | 0           | -0.421668               | -1.214157 | 1.963017  |
| 19            | 1             | 0           | -3.021619               | 1.089862  | 0.573225  |
| 20            | 1             | 0           | -3.335649               | -1.433281 | 1.529798  |
| 21            | 1             | 0           | -2.028105               | 1.907479  | -1.722173 |
| 22            | 1             | 0           | -0.437107               | 1.312703  | -2.280740 |
| 23            | 1             | 0           | 1.046164                | -1.018563 | -1.484296 |
| 24            | 1             | 0           | 1.387657                | 0.707061  | -1.434079 |
| 25            | 1             | 0           | 4.343913                | -0.695924 | -0.383210 |

**13' (Conformer 8 of 8)**

Sum of electronic and thermal Free Energies = -762.750902 Hartrees

| Center | Atomic | Atomic | Coordinates (Angstroms) |  |  |
|--------|--------|--------|-------------------------|--|--|
|--------|--------|--------|-------------------------|--|--|

| Number | Number | Type | X         | Y         | Z         |
|--------|--------|------|-----------|-----------|-----------|
| 1      | 6      | 0    | -2.276237 | -1.175662 | 0.464590  |
| 2      | 6      | 0    | -1.329366 | -0.498856 | 1.538746  |
| 3      | 6      | 0    | -0.209481 | 0.012634  | 0.611150  |
| 4      | 6      | 0    | -0.894193 | -0.176335 | -0.781790 |
| 5      | 6      | 0    | -2.178642 | 0.653342  | -0.837404 |
| 6      | 6      | 0    | -3.065086 | -0.013174 | -0.101673 |
| 7      | 8      | 0    | -1.386757 | -1.495337 | -0.644207 |
| 8      | 6      | 0    | 0.173842  | 0.366098  | -1.705705 |
| 9      | 8      | 0    | 0.546397  | 1.552610  | -0.944180 |
| 10     | 6      | 0    | 0.259296  | 1.434428  | 0.392767  |
| 11     | 6      | 0    | 1.005315  | -0.937814 | 0.817048  |
| 12     | 6      | 0    | 2.336340  | -0.576924 | 0.200399  |
| 13     | 8      | 0    | 2.898895  | 0.484626  | 0.339004  |
| 14     | 8      | 0    | 2.881736  | -1.602522 | -0.473440 |
| 15     | 8      | 0    | 0.371283  | 2.364921  | 1.142725  |
| 16     | 1      | 0    | -2.810323 | -2.066212 | 0.787735  |
| 17     | 1      | 0    | -0.943462 | -1.227408 | 2.253407  |
| 18     | 1      | 0    | -1.855473 | 0.284753  | 2.085577  |
| 19     | 1      | 0    | -2.271596 | 1.605798  | -1.346092 |
| 20     | 1      | 0    | -4.079205 | 0.254105  | 0.168833  |
| 21     | 1      | 0    | -0.185857 | 0.708655  | -2.675991 |
| 22     | 1      | 0    | 1.037430  | -0.289512 | -1.843544 |
| 23     | 1      | 0    | 1.210641  | -0.954303 | 1.893387  |
| 24     | 1      | 0    | 0.710643  | -1.944291 | 0.514208  |
| 25     | 1      | 0    | 3.764042  | -1.332395 | -0.785508 |

**13<sup>Me</sup> (Conformer 1 of 6)**

Sum of electronic and thermal Free Energies = -802.005896 Hartrees

| Center<br>Number | Atomic<br>Number | Atomic<br>Type | Coordinates (Angstroms) |           |           |
|------------------|------------------|----------------|-------------------------|-----------|-----------|
|                  |                  |                | X                       | Y         | Z         |
| 1                | 6                | 0              | -2.477624               | -1.303408 | 0.520026  |
| 2                | 6                | 0              | -1.714484               | -0.361316 | 1.538309  |
| 3                | 6                | 0              | -0.572347               | 0.132603  | 0.629665  |
| 4                | 6                | 0              | -1.093806               | -0.352859 | -0.762402 |
| 5                | 6                | 0              | -2.446891               | 0.298753  | -1.055892 |
| 6                | 6                | 0              | -3.325368               | -0.345354 | -0.291101 |
| 7                | 8                | 0              | -1.456343               | -1.683444 | -0.446940 |
| 8                | 6                | 0              | -0.002254               | 0.160947  | -1.675399 |
| 9                | 8                | 0              | 0.170853                | 1.487593  | -1.093083 |
| 10               | 6                | 0              | -0.245296               | 1.549350  | 0.214306  |
| 11               | 6                | 0              | 0.719056                | -0.611321 | 1.082313  |
| 12               | 6                | 0              | 2.050584                | -0.166619 | 0.519387  |
| 13               | 8                | 0              | 2.486096                | 0.960452  | 0.597124  |
| 14               | 8                | 0              | 2.733578                | -1.181055 | -0.025680 |

|    |   |   |           |           |           |
|----|---|---|-----------|-----------|-----------|
| 15 | 8 | 0 | -0.320195 | 2.594789  | 0.799226  |
| 16 | 1 | 0 | -2.943916 | -2.189940 | 0.943622  |
| 17 | 1 | 0 | -1.322816 | -0.920758 | 2.389107  |
| 18 | 1 | 0 | -2.369922 | 0.428164  | 1.908873  |
| 19 | 1 | 0 | -2.589998 | 1.143782  | -1.719375 |
| 20 | 1 | 0 | -4.382880 | -0.160258 | -0.147912 |
| 21 | 1 | 0 | -0.298726 | 0.304141  | -2.714595 |
| 22 | 1 | 0 | 0.932529  | -0.403812 | -1.631896 |
| 23 | 1 | 0 | 0.812790  | -0.442435 | 2.160514  |
| 24 | 1 | 0 | 0.577035  | -1.681018 | 0.915516  |
| 25 | 6 | 0 | 4.040393  | -0.856247 | -0.521166 |
| 26 | 1 | 0 | 4.436156  | -1.783206 | -0.932499 |
| 27 | 1 | 0 | 3.971726  | -0.090671 | -1.297339 |
| 28 | 1 | 0 | 4.674330  | -0.497851 | 0.292534  |

---

 **$^{13}\text{C}$  (Conformer 2 of 6)**

Sum of electronic and thermal Free Energies = -802.010291 Hartrees

| Center<br>Number | Atomic<br>Number | Atomic<br>Type | Coordinates (Angstroms) |           |           |
|------------------|------------------|----------------|-------------------------|-----------|-----------|
|                  |                  |                | X                       | Y         | Z         |
| 1                | 6                | 0              | -0.236724               | 2.059012  | -0.377547 |
| 2                | 6                | 0              | -0.602786               | 0.992518  | -1.489772 |
| 3                | 6                | 0              | -0.669145               | -0.267684 | -0.614702 |
| 4                | 6                | 0              | -0.651471               | 0.358382  | 0.813146  |
| 5                | 6                | 0              | -1.858584               | 1.281296  | 0.976785  |
| 6                | 6                | 0              | -1.567436               | 2.374677  | 0.274090  |
| 7                | 8                | 0              | 0.417773                | 1.276063  | 0.662930  |
| 8                | 6                | 0              | -0.734401               | -0.882421 | 1.677463  |
| 9                | 8                | 0              | -1.738248               | -1.627396 | 0.917309  |
| 10               | 6                | 0              | -1.814421               | -1.225035 | -0.391418 |
| 11               | 6                | 0              | 0.559690                | -1.186868 | -0.900284 |
| 12               | 6                | 0              | 1.885624                | -0.503714 | -0.645955 |
| 13               | 8                | 0              | 2.448121                | 0.229779  | -1.429486 |
| 14               | 8                | 0              | 2.385856                | -0.827233 | 0.550639  |
| 15               | 8                | 0              | -2.657084               | -1.657567 | -1.131027 |
| 16               | 1                | 0              | 0.407151                | 2.877333  | -0.691680 |
| 17               | 1                | 0              | 0.184406                | 0.906661  | -2.239351 |
| 18               | 1                | 0              | -1.542142               | 1.246898  | -1.982777 |
| 19               | 1                | 0              | -2.760804               | 1.023442  | 1.519511  |
| 20               | 1                | 0              | -2.176084               | 3.248369  | 0.075336  |
| 21               | 1                | 0              | -1.146662               | -0.721578 | 2.673453  |
| 22               | 1                | 0              | 0.192945                | -1.454988 | 1.734851  |
| 23               | 1                | 0              | 0.517186                | -2.108968 | -0.315820 |
| 24               | 1                | 0              | 0.517849                | -1.453328 | -1.959472 |
| 25               | 6                | 0              | 3.580360                | -0.133866 | 0.930641  |
| 26               | 1                | 0              | 4.390106                | -0.358944 | 0.233409  |
| 27               | 1                | 0              | 3.394141                | 0.942469  | 0.946795  |
| 28               | 1                | 0              | 3.826320                | -0.494312 | 1.928148  |

---



**13'<sup>Me</sup> (Conformer 3 of 6)**

Sum of electronic and thermal Free Energies = -802.009781 Hartrees

| Center Number | Atomic Number | Atomic Type | Coordinates (Angstroms) |           |           |
|---------------|---------------|-------------|-------------------------|-----------|-----------|
|               |               |             | X                       | Y         | Z         |
| 1             | 6             | 0           | -0.131701               | 1.990826  | 0.260996  |
| 2             | 6             | 0           | 0.195468                | 0.982766  | 1.438474  |
| 3             | 6             | 0           | 0.611823                | -0.239712 | 0.609318  |
| 4             | 6             | 0           | 0.757004                | 0.394430  | -0.807997 |
| 5             | 6             | 0           | 1.810937                | 1.499999  | -0.766866 |
| 6             | 6             | 0           | 1.227426                | 2.523781  | -0.145904 |
| 7             | 8             | 0           | -0.454200               | 1.128434  | -0.867484 |
| 8             | 6             | 0           | 1.185005                | -0.810510 | -1.619620 |
| 9             | 8             | 0           | 2.142477                | -1.393540 | -0.678159 |
| 10            | 6             | 0           | 1.917023                | -0.997894 | 0.614618  |
| 11            | 6             | 0           | -0.483239               | -1.351878 | 0.668598  |
| 12            | 6             | 0           | -1.786544               | -0.982922 | -0.007239 |
| 13            | 8             | 0           | -2.132622               | -1.409047 | -1.087413 |
| 14            | 8             | 0           | -2.536111               | -0.162324 | 0.734819  |
| 15            | 8             | 0           | 2.670196                | -1.296409 | 1.502402  |
| 16            | 1             | 0           | -0.943219               | 2.692836  | 0.440174  |
| 17            | 1             | 0           | -0.684333               | 0.765223  | 2.043614  |
| 18            | 1             | 0           | 0.984701                | 1.376288  | 2.080707  |
| 19            | 1             | 0           | 2.825630                | 1.396751  | -1.133806 |
| 20            | 1             | 0           | 1.643284                | 3.480855  | 0.144474  |
| 21            | 1             | 0           | 1.737242                | -0.579734 | -2.530354 |
| 22            | 1             | 0           | 0.382241                | -1.520997 | -1.826487 |
| 23            | 1             | 0           | -0.139050               | -2.275242 | 0.197679  |
| 24            | 1             | 0           | -0.669284               | -1.562216 | 1.725555  |
| 25            | 6             | 0           | -3.732556               | 0.317688  | 0.109373  |
| 26            | 1             | 0           | -3.482554               | 0.852861  | -0.809992 |
| 27            | 1             | 0           | -4.403159               | -0.513488 | -0.118487 |
| 28            | 1             | 0           | -4.193300               | 0.990504  | 0.831100  |

**13'<sup>Me</sup> (Conformer 4 of 6)**

Sum of electronic and thermal Free Energies = -802.006207 Hartrees

| Center Number | Atomic Number | Atomic Type | Coordinates (Angstroms) |           |           |
|---------------|---------------|-------------|-------------------------|-----------|-----------|
|               |               |             | X                       | Y         | Z         |
| 1             | 6             | 0           | 2.733849                | -0.842609 | -0.613911 |
| 2             | 6             | 0           | 1.608932                | -0.315951 | -1.594143 |
| 3             | 6             | 0           | 0.482023                | -0.045405 | -0.580939 |
| 4             | 6             | 0           | 1.276519                | -0.174040 | 0.762869  |
| 5             | 6             | 0           | 2.387814                | 0.875536  | 0.795482  |
| 6             | 6             | 0           | 3.329829                | 0.421190  | -0.028129 |
| 7             | 8             | 0           | 1.989554                | -1.371080 | 0.519908  |
| 8             | 6             | 0           | 0.185075                | 0.091163  | 1.775505  |
| 9             | 8             | 0           | -0.500036               | 1.195043  | 1.095759  |
| 10            | 6             | 0           | -0.196697               | 1.260715  | -0.245985 |

|    |   |   |           |           |           |
|----|---|---|-----------|-----------|-----------|
| 11 | 6 | 0 | -0.594804 | -1.167762 | -0.735820 |
| 12 | 6 | 0 | -1.953372 | -0.940526 | -0.106667 |
| 13 | 8 | 0 | -2.415178 | -1.574249 | 0.817881  |
| 14 | 8 | 0 | -2.614437 | 0.039773  | -0.726404 |
| 15 | 8 | 0 | -0.463725 | 2.229620  | -0.900958 |
| 16 | 1 | 0 | 3.401983  | -1.601813 | -1.013910 |
| 17 | 1 | 0 | 1.312885  | -1.082970 | -2.311266 |
| 18 | 1 | 0 | 1.944282  | 0.565998  | -2.142149 |
| 19 | 1 | 0 | 2.337831  | 1.805631  | 1.350012  |
| 20 | 1 | 0 | 4.256312  | 0.886750  | -0.341193 |
| 21 | 1 | 0 | 0.534494  | 0.478258  | 2.732872  |
| 22 | 1 | 0 | -0.501770 | -0.742067 | 1.930962  |
| 23 | 1 | 0 | -0.782039 | -1.283864 | -1.806888 |
| 24 | 1 | 0 | -0.182875 | -2.103240 | -0.351134 |
| 25 | 6 | 0 | -3.880092 | 0.405500  | -0.161286 |
| 26 | 1 | 0 | -4.575245 | -0.435042 | -0.214128 |
| 27 | 1 | 0 | -3.750166 | 0.714254  | 0.878349  |
| 28 | 1 | 0 | -4.239576 | 1.238381  | -0.762861 |

---

 **$^{13}\text{C}$  (Conformer 5 of 6)**

Sum of electronic and thermal Free Energies = -802.009165 Hartrees

| Center<br>Number | Atomic<br>Number | Atomic<br>Type | Coordinates (Angstroms) |           |           |
|------------------|------------------|----------------|-------------------------|-----------|-----------|
|                  |                  |                | X                       | Y         | Z         |
| 1                | 6                | 0              | -1.738340               | -1.918530 | 0.137330  |
| 2                | 6                | 0              | -0.503859               | -1.308990 | 0.915616  |
| 3                | 6                | 0              | -0.338886               | 0.012329  | 0.144546  |
| 4                | 6                | 0              | -1.660634               | 0.025064  | -0.690284 |
| 5                | 6                | 0              | -2.854566               | 0.030256  | 0.263784  |
| 6                | 6                | 0              | -2.934659               | -1.211190 | 0.738384  |
| 7                | 8                | 0              | -1.662250               | -1.302041 | -1.181357 |
| 8                | 6                | 0              | -1.520107               | 1.322855  | -1.456892 |
| 9                | 8                | 0              | -0.985597               | 2.166548  | -0.391812 |
| 10               | 6                | 0              | -0.422506               | 1.439666  | 0.634538  |
| 11               | 6                | 0              | 0.898767                | -0.075518 | -0.772766 |
| 12               | 6                | 0              | 2.187199                | -0.198214 | 0.009790  |
| 13               | 8                | 0              | 2.287058                | -0.224549 | 1.215007  |
| 14               | 8                | 0              | 3.236326                | -0.270377 | -0.818340 |
| 15               | 8                | 0              | -0.091505               | 1.973909  | 1.656370  |
| 16               | 1                | 0              | -1.761045               | -3.001987 | 0.045288  |
| 17               | 1                | 0              | 0.384419                | -1.932958 | 0.811988  |
| 18               | 1                | 0              | -0.720484               | -1.190515 | 1.977869  |
| 19               | 1                | 0              | -3.441347               | 0.907923  | 0.509728  |
| 20               | 1                | 0              | -3.599267               | -1.620655 | 1.489234  |
| 21               | 1                | 0              | -2.462784               | 1.768692  | -1.774303 |
| 22               | 1                | 0              | -0.822285               | 1.284632  | -2.295513 |
| 23               | 1                | 0              | 0.806658                | -0.947195 | -1.429581 |
| 24               | 1                | 0              | 1.015994                | 0.799161  | -1.420498 |
| 25               | 6                | 0              | 4.521482                | -0.382053 | -0.190954 |
| 26               | 1                | 0              | 4.700890                | 0.476252  | 0.459601  |
| 27               | 1                | 0              | 4.578510                | -1.303353 | 0.392870  |

28            1            0            5.245129    -0.401966    -1.004179

---

### 13<sup>Me</sup> (Conformer 6 of 6)

Sum of electronic and thermal Free Energies = -802.007964 Hartrees

---

| Center<br>Number | Atomic<br>Number | Atomic<br>Type | Coordinates (Angstroms) |           |           |
|------------------|------------------|----------------|-------------------------|-----------|-----------|
|                  |                  |                | X                       | Y         | Z         |
| 1                | 6                | 0              | -1.861906               | -1.819918 | -0.227325 |
| 2                | 6                | 0              | -0.436825               | -1.539313 | 0.405766  |
| 3                | 6                | 0              | -0.269513               | -0.063570 | -0.000185 |
| 4                | 6                | 0              | -1.720282               | 0.275419  | -0.464969 |
| 5                | 6                | 0              | -2.687984               | 0.054099  | 0.697327  |
| 6                | 6                | 0              | -2.824491               | -1.266070 | 0.801298  |
| 7                | 8                | 0              | -1.977118               | -0.839095 | -1.299566 |
| 8                | 6                | 0              | -1.596366               | 1.739952  | -0.831375 |
| 9                | 8                | 0              | -0.740363               | 2.187107  | 0.265261  |
| 10               | 6                | 0              | -0.048670               | 1.161284  | 0.855522  |
| 11               | 6                | 0              | 0.753765                | 0.050068  | -1.164896 |
| 12               | 6                | 0              | 2.184718                | 0.052790  | -0.665097 |
| 13               | 8                | 0              | 2.986176                | 0.924760  | -0.919323 |
| 14               | 8                | 0              | 2.473944                | -1.009548 | 0.090829  |
| 15               | 8                | 0              | 0.622141                | 1.342768  | 1.836295  |
| 16               | 1                | 0              | -2.025320               | -2.822501 | -0.615678 |
| 17               | 1                | 0              | 0.338161                | -2.157494 | -0.044491 |
| 18               | 1                | 0              | -0.442993               | -1.716349 | 1.482137  |
| 19               | 1                | 0              | -3.104524               | 0.846984  | 1.308061  |
| 20               | 1                | 0              | -3.373020               | -1.847610 | 1.532134  |
| 21               | 1                | 0              | -2.527299               | 2.301903  | -0.757906 |
| 22               | 1                | 0              | -1.113716               | 1.941266  | -1.788533 |
| 23               | 1                | 0              | 0.607712                | -0.794848 | -1.843991 |
| 24               | 1                | 0              | 0.643898                | 0.970917  | -1.737809 |
| 25               | 6                | 0              | 3.796707                | -1.042069 | 0.646138  |
| 26               | 1                | 0              | 4.542509                | -1.045203 | -0.151390 |
| 27               | 1                | 0              | 3.951311                | -0.176836 | 1.293907  |
| 28               | 1                | 0              | 3.850117                | -1.964198 | 1.222367  |

---

### 14 (Conformer 1 of 8)

Sum of electronic and thermal Free Energies = -762.784244 Hartrees

---

| Center<br>Number | Atomic<br>Number | Atomic<br>Type | Coordinates (Angstroms) |           |           |
|------------------|------------------|----------------|-------------------------|-----------|-----------|
|                  |                  |                | X                       | Y         | Z         |
| 1                | 6                | 0              | 1.604031                | -1.185505 | 1.245701  |
| 2                | 6                | 0              | 0.092594                | -0.799502 | 1.299026  |
| 3                | 6                | 0              | -0.010890               | 0.081972  | 0.031330  |
| 4                | 6                | 0              | 1.468068                | 0.039525  | -0.495647 |
| 5                | 6                | 0              | 1.769008                | -1.340108 | -1.034390 |
| 6                | 6                | 0              | 1.826667                | -2.111359 | 0.056679  |

---

|    |   |   |           |           |           |
|----|---|---|-----------|-----------|-----------|
| 7  | 8 | 0 | 2.159504  | 0.041157  | 0.755357  |
| 8  | 6 | 0 | 1.652803  | 1.362365  | -1.188190 |
| 9  | 8 | 0 | 0.771243  | 2.255198  | -0.459103 |
| 10 | 6 | 0 | -0.135424 | 1.580422  | 0.250485  |
| 11 | 6 | 0 | -1.098340 | -0.356462 | -0.962141 |
| 12 | 6 | 0 | -2.469335 | -0.607272 | -0.344987 |
| 13 | 8 | 0 | -3.180049 | -1.505959 | -0.733272 |
| 14 | 8 | 0 | -2.888184 | 0.196911  | 0.634304  |
| 15 | 8 | 0 | -0.984694 | 2.149854  | 0.906943  |
| 16 | 1 | 0 | 2.051250  | -1.468733 | 2.196257  |
| 17 | 1 | 0 | -0.121575 | -0.233780 | 2.209231  |
| 18 | 1 | 0 | -0.569497 | -1.668161 | 1.256459  |
| 19 | 1 | 0 | 1.797162  | -1.626699 | -2.078197 |
| 20 | 1 | 0 | 1.922460  | -3.188778 | 0.114001  |
| 21 | 1 | 0 | 1.335896  | 1.337733  | -2.233730 |
| 22 | 1 | 0 | 2.666089  | 1.754303  | -1.102703 |
| 23 | 1 | 0 | -1.231289 | 0.385558  | -1.761165 |
| 24 | 1 | 0 | -0.804295 | -1.298912 | -1.429789 |
| 25 | 1 | 0 | -2.263853 | 0.925727  | 0.848612  |

---

**14 (Conformer 2 of 8)**

Sum of electronic and thermal Free Energies = -762.785706 Hartrees

| Center<br>Number | Atomic<br>Number | Atomic<br>Type | Coordinates (Angstroms) |           |           |
|------------------|------------------|----------------|-------------------------|-----------|-----------|
|                  |                  |                | X                       | Y         | Z         |
| 1                | 6                | 0              | 1.965050                | -1.104870 | 0.953162  |
| 2                | 6                | 0              | 0.413374                | -1.116716 | 1.122614  |
| 3                | 6                | 0              | 0.017586                | -0.055775 | 0.073106  |
| 4                | 6                | 0              | 1.417174                | 0.368608  | -0.487784 |
| 5                | 6                | 0              | 1.982100                | -0.765893 | -1.312703 |
| 6                | 6                | 0              | 2.303441                | -1.698656 | -0.409412 |
| 7                | 8                | 0              | 2.187871                | 0.290915  | 0.713306  |
| 8                | 6                | 0              | 1.227078                | 1.803925  | -0.901939 |
| 9                | 8                | 0              | 0.214970                | 2.297134  | 0.004840  |
| 10               | 6                | 0              | -0.444317               | 1.290473  | 0.618032  |
| 11               | 6                | 0              | -0.986074               | -0.509213 | -0.998709 |
| 12               | 6                | 0              | -2.401993               | -0.616905 | -0.479251 |
| 13               | 8                | 0              | -3.351149               | -0.035246 | -0.952227 |
| 14               | 8                | 0              | -2.507737               | -1.453774 | 0.561843  |
| 15               | 8                | 0              | -1.306539               | 1.497585  | 1.433255  |
| 16               | 1                | 0              | 2.538440                | -1.452523 | 1.810379  |
| 17               | 1                | 0              | 0.134991                | -0.806679 | 2.132416  |
| 18               | 1                | 0              | -0.032652               | -2.090896 | 0.917575  |
| 19               | 1                | 0              | 1.988694                | -0.828348 | -2.393990 |
| 20               | 1                | 0              | 2.647714                | -2.711397 | -0.581439 |
| 21               | 1                | 0              | 0.861200                | 1.895997  | -1.928136 |
| 22               | 1                | 0              | 2.124494                | 2.407601  | -0.763270 |
| 23               | 1                | 0              | -1.009651               | 0.191034  | -1.838406 |
| 24               | 1                | 0              | -0.680140               | -1.493259 | -1.370831 |
| 25               | 1                | 0              | -3.432930               | -1.454305 | 0.864883  |

---

**14 (Conformer 3 of 8)**

Sum of electronic and thermal Free Energies = -762.785419 Hartrees

| Center Number | Atomic Number | Atomic Type | Coordinates (Angstroms) |           |           |
|---------------|---------------|-------------|-------------------------|-----------|-----------|
|               |               |             | X                       | Y         | Z         |
| 1             | 6             | 0           | 1.983452                | -1.064324 | 0.973076  |
| 2             | 6             | 0           | 0.431744                | -1.099779 | 1.140137  |
| 3             | 6             | 0           | 0.023732                | -0.060467 | 0.074831  |
| 4             | 6             | 0           | 1.415324                | 0.379206  | -0.491274 |
| 5             | 6             | 0           | 2.002116                | -0.757206 | -1.297750 |
| 6             | 6             | 0           | 2.335385                | -1.671588 | -0.380060 |
| 7             | 8             | 0           | 2.183693                | 0.331985  | 0.713054  |
| 8             | 6             | 0           | 1.199200                | 1.804735  | -0.926721 |
| 9             | 8             | 0           | 0.176256                | 2.292994  | -0.028977 |
| 10            | 6             | 0           | -0.460418               | 1.283362  | 0.603646  |
| 11            | 6             | 0           | -0.976297               | -0.554670 | -0.983384 |
| 12            | 6             | 0           | -2.333596               | -0.797463 | -0.361872 |
| 13            | 8             | 0           | -2.583016               | -1.692932 | 0.412955  |
| 14            | 8             | 0           | -3.246066               | 0.097241  | -0.759832 |
| 15            | 8             | 0           | -1.317067               | 1.484947  | 1.425855  |
| 16            | 1             | 0           | 2.560850                | -1.389276 | 1.836411  |
| 17            | 1             | 0           | 0.147513                | -0.777892 | 2.144647  |
| 18            | 1             | 0           | -0.002144               | -2.082555 | 0.949296  |
| 19            | 1             | 0           | 2.012964                | -0.836057 | -2.377910 |
| 20            | 1             | 0           | 2.696026                | -2.681152 | -0.536330 |
| 21            | 1             | 0           | 0.833752                | 1.874395  | -1.954893 |
| 22            | 1             | 0           | 2.084817                | 2.427386  | -0.795770 |
| 23            | 1             | 0           | -1.070401               | 0.167932  | -1.799494 |
| 24            | 1             | 0           | -0.617008               | -1.506868 | -1.383920 |
| 25            | 1             | 0           | -4.080627               | -0.080624 | -0.290259 |

**14 (Conformer 4 of 8)**

Sum of electronic and thermal Free Energies = -762.785451 Hartrees

| Center Number | Atomic Number | Atomic Type | Coordinates (Angstroms) |           |           |
|---------------|---------------|-------------|-------------------------|-----------|-----------|
|               |               |             | X                       | Y         | Z         |
| 1             | 6             | 0           | -2.466228               | -0.553453 | -0.576775 |
| 2             | 6             | 0           | -1.317892               | -0.201139 | -1.568132 |
| 3             | 6             | 0           | -0.166142               | 0.096671  | -0.571462 |
| 4             | 6             | 0           | -0.919653               | -0.033869 | 0.803457  |
| 5             | 6             | 0           | -1.174675               | -1.500936 | 1.066499  |
| 6             | 6             | 0           | -2.116212               | -1.833734 | 0.175424  |
| 7             | 8             | 0           | -2.219438               | 0.434751  | 0.424807  |
| 8             | 6             | 0           | -0.285048               | 1.000880  | 1.696668  |
| 9             | 8             | 0           | 0.157191                | 2.021049  | 0.774404  |
| 10            | 6             | 0           | 0.275979                | 1.554631  | -0.482449 |
| 11            | 6             | 0           | 1.019461                | -0.823200 | -0.874752 |
| 12            | 6             | 0           | 2.226713                | -0.696728 | 0.014728  |
| 13            | 8             | 0           | 2.411356                | 0.168080  | 0.841495  |
| 14            | 8             | 0           | 3.119766                | -1.664454 | -0.232504 |

|    |   |   |           |           |           |
|----|---|---|-----------|-----------|-----------|
| 15 | 8 | 0 | 0.690455  | 2.243537  | -1.381905 |
| 16 | 1 | 0 | -3.474999 | -0.468871 | -0.977287 |
| 17 | 1 | 0 | -1.591163 | 0.683901  | -2.147287 |
| 18 | 1 | 0 | -1.071339 | -1.013436 | -2.254977 |
| 19 | 1 | 0 | -0.607415 | -2.140342 | 1.732206  |
| 20 | 1 | 0 | -2.512473 | -2.817340 | -0.046635 |
| 21 | 1 | 0 | 0.578135  | 0.624895  | 2.246132  |
| 22 | 1 | 0 | -1.009976 | 1.458212  | 2.371149  |
| 23 | 1 | 0 | 0.689985  | -1.867050 | -0.868202 |
| 24 | 1 | 0 | 1.366461  | -0.618751 | -1.895998 |
| 25 | 1 | 0 | 3.900317  | -1.519667 | 0.331284  |

---

**14 (Conformer 5 of 8)**

Sum of electronic and thermal Free Energies = -762.785364 Hartrees

| Center<br>Number | Atomic<br>Number | Atomic<br>Type | Coordinates (Angstroms) |           |           |
|------------------|------------------|----------------|-------------------------|-----------|-----------|
|                  |                  |                | X                       | Y         | Z         |
| 1                | 6                | 0              | -2.540314               | -0.056548 | -0.418140 |
| 2                | 6                | 0              | -1.460467               | 0.396481  | -1.448717 |
| 3                | 6                | 0              | -0.183883               | 0.262651  | -0.585018 |
| 4                | 6                | 0              | -0.787288               | -0.183635 | 0.791849  |
| 5                | 6                | 0              | -1.260398               | -1.615326 | 0.673396  |
| 6                | 6                | 0              | -2.341769               | -1.536688 | -0.110331 |
| 7                | 8                | 0              | -2.015370               | 0.549272  | 0.768652  |
| 8                | 6                | 0              | 0.142597                | 0.416379  | 1.814813  |
| 9                | 8                | 0              | 0.632330                | 1.615311  | 1.175853  |
| 10               | 6                | 0              | 0.457974                | 1.581503  | -0.162693 |
| 11               | 6                | 0              | 0.849896                | -0.672444 | -1.239148 |
| 12               | 6                | 0              | 2.002626                | -1.060927 | -0.346256 |
| 13               | 8                | 0              | 2.208592                | -2.174821 | 0.081121  |
| 14               | 8                | 0              | 2.792048                | -0.015583 | -0.060980 |
| 15               | 8                | 0              | 0.792780                | 2.495229  | -0.871616 |
| 16               | 1                | 0              | -3.554727               | 0.283539  | -0.618205 |
| 17               | 1                | 0              | -1.637596               | 1.432944  | -1.744451 |
| 18               | 1                | 0              | -1.425640               | -0.229340 | -2.342914 |
| 19               | 1                | 0              | -0.738243               | -2.492929 | 1.034594  |
| 20               | 1                | 0              | -2.927361               | -2.346108 | -0.529254 |
| 21               | 1                | 0              | 0.987725                | -0.235814 | 2.055024  |
| 22               | 1                | 0              | -0.372549               | 0.711231  | 2.729791  |
| 23               | 1                | 0              | 0.348598                | -1.590365 | -1.550182 |
| 24               | 1                | 0              | 1.252623                | -0.169419 | -2.125495 |
| 25               | 1                | 0              | 3.510287                | -0.307681 | 0.528314  |

---

**14 (Conformer 6 of 8)**

Sum of electronic and thermal Free Energies = -762.784149 Hartrees

| Center<br>Number | Atomic<br>Number | Atomic<br>Type | Coordinates (Angstroms) |   |   |
|------------------|------------------|----------------|-------------------------|---|---|
|                  |                  |                | X                       | Y | Z |

---

|    |   |   |           |           |           |
|----|---|---|-----------|-----------|-----------|
| 1  | 6 | 0 | 0.246270  | 1.958030  | -0.932679 |
| 2  | 6 | 0 | 0.097343  | 0.560587  | -1.610132 |
| 3  | 6 | 0 | 0.344267  | -0.354978 | -0.392583 |
| 4  | 6 | 0 | 0.588292  | 0.689812  | 0.750253  |
| 5  | 6 | 0 | -0.702161 | 1.406455  | 1.079764  |
| 6  | 6 | 0 | -0.931223 | 2.175782  | 0.009612  |
| 7  | 8 | 0 | 1.300957  | 1.679035  | -0.000285 |
| 8  | 6 | 0 | 1.515437  | -0.019403 | 1.699958  |
| 9  | 8 | 0 | 2.285517  | -0.891781 | 0.840924  |
| 10 | 6 | 0 | 1.705542  | -1.044003 | -0.369284 |
| 11 | 6 | 0 | -0.682397 | -1.477440 | -0.131882 |
| 12 | 6 | 0 | -2.093665 | -1.019569 | 0.150379  |
| 13 | 8 | 0 | -2.626820 | -1.071813 | 1.236023  |
| 14 | 8 | 0 | -2.728877 | -0.573217 | -0.942580 |
| 15 | 8 | 0 | 2.221359  | -1.690549 | -1.244336 |
| 16 | 1 | 0 | 0.515969  | 2.778099  | -1.595261 |
| 17 | 1 | 0 | 0.874148  | 0.425113  | -2.366660 |
| 18 | 1 | 0 | -0.880526 | 0.406382  | -2.066051 |
| 19 | 1 | 0 | -1.333008 | 1.220453  | 1.939381  |
| 20 | 1 | 0 | -1.803384 | 2.780121  | -0.209307 |
| 21 | 1 | 0 | 0.974357  | -0.624487 | 2.432912  |
| 22 | 1 | 0 | 2.210658  | 0.654607  | 2.201721  |
| 23 | 1 | 0 | -0.700404 | -2.125610 | -1.014613 |
| 24 | 1 | 0 | -0.372940 | -2.079627 | 0.727299  |
| 25 | 1 | 0 | -3.628183 | -0.300080 | -0.687829 |

---

**14 (Conformer 7 of 8)**

Sum of electronic and thermal Free Energies = -762.784136 Hartrees

---

| Center<br>Number | Atomic<br>Number | Atomic<br>Type | Coordinates (Angstroms) |           |           |
|------------------|------------------|----------------|-------------------------|-----------|-----------|
|                  |                  |                | X                       | Y         | Z         |
| 1                | 6                | 0              | 0.263812                | 1.934714  | -0.973937 |
| 2                | 6                | 0              | 0.111966                | 0.521945  | -1.618009 |
| 3                | 6                | 0              | 0.350378                | -0.364285 | -0.376800 |
| 4                | 6                | 0              | 0.612725                | 0.707203  | 0.736143  |
| 5                | 6                | 0              | -0.674931               | 1.432772  | 1.055930  |
| 6                | 6                | 0              | -0.909472               | 2.175607  | -0.031560 |
| 7                | 8                | 0              | 1.322916                | 1.676472  | -0.040536 |
| 8                | 6                | 0              | 1.543255                | 0.018166  | 1.697849  |
| 9                | 8                | 0              | 2.289907                | -0.896158 | 0.862844  |
| 10               | 6                | 0              | 1.696575                | -1.080945 | -0.336354 |
| 11               | 6                | 0              | -0.706385               | -1.449012 | -0.082513 |
| 12               | 6                | 0              | -2.132168               | -0.948806 | -0.042990 |
| 13               | 8                | 0              | -2.764922               | -0.575369 | -1.004829 |
| 14               | 8                | 0              | -2.659469               | -0.998701 | 1.189524  |

|    |   |   |           |           |           |
|----|---|---|-----------|-----------|-----------|
| 15 | 8 | 0 | 2.193147  | -1.769280 | -1.190317 |
| 16 | 1 | 0 | 0.530486  | 2.738927  | -1.656805 |
| 17 | 1 | 0 | 0.892185  | 0.368317  | -2.367321 |
| 18 | 1 | 0 | -0.865110 | 0.357958  | -2.072489 |
| 19 | 1 | 0 | -1.302602 | 1.265312  | 1.921879  |
| 20 | 1 | 0 | -1.785564 | 2.768970  | -0.264183 |
| 21 | 1 | 0 | 1.006231  | -0.552233 | 2.460920  |
| 22 | 1 | 0 | 2.253764  | 0.700928  | 2.165363  |
| 23 | 1 | 0 | -0.658821 | -2.187802 | -0.889721 |
| 24 | 1 | 0 | -0.477998 | -1.957614 | 0.859072  |
| 25 | 1 | 0 | -3.579735 | -0.682640 | 1.143250  |

---

**14 (Conformer 8 of 8)**

Sum of electronic and thermal Free Energies = -762.780812 Hartrees

| Center<br>Number | Atomic<br>Number | Atomic<br>Type | Coordinates (Angstroms) |           |           |
|------------------|------------------|----------------|-------------------------|-----------|-----------|
|                  |                  |                | X                       | Y         | Z         |
| 1                | 6                | 0              | -2.542743               | 0.143298  | -0.467686 |
| 2                | 6                | 0              | -1.406905               | 0.577447  | -1.445088 |
| 3                | 6                | 0              | -0.167863               | 0.291660  | -0.565928 |
| 4                | 6                | 0              | -0.835113               | -0.195620 | 0.768033  |
| 5                | 6                | 0              | -1.412036               | -1.575613 | 0.546759  |
| 6                | 6                | 0              | -2.463970               | -1.364002 | -0.252035 |
| 7                | 8                | 0              | -2.002093               | 0.631808  | 0.765210  |
| 8                | 6                | 0              | 0.105839                | 0.262373  | 1.852383  |
| 9                | 8                | 0              | 0.734944                | 1.440789  | 1.289480  |
| 10               | 6                | 0              | 0.585865                | 1.508327  | -0.044805 |
| 11               | 6                | 0              | 0.825717                | -0.661842 | -1.258501 |
| 12               | 6                | 0              | 1.946887                | -1.117386 | -0.346689 |
| 13               | 8                | 0              | 1.933707                | -2.165658 | 0.253078  |
| 14               | 8                | 0              | 2.977435                | -0.271813 | -0.175978 |
| 15               | 8                | 0              | 1.078208                | 2.397942  | -0.696607 |
| 16               | 1                | 0              | -3.523139               | 0.572681  | -0.665692 |
| 17               | 1                | 0              | -1.498927               | 1.640958  | -1.677235 |
| 18               | 1                | 0              | -1.393888               | 0.007681  | -2.376630 |
| 19               | 1                | 0              | -0.965060               | -2.509792 | 0.863199  |
| 20               | 1                | 0              | -3.099395               | -2.097530 | -0.733405 |
| 21               | 1                | 0              | 0.879929                | -0.471705 | 2.089435  |
| 22               | 1                | 0              | -0.416967               | 0.566709  | 2.759517  |
| 23               | 1                | 0              | 0.285704                | -1.551946 | -1.586454 |
| 24               | 1                | 0              | 1.233817                | -0.154391 | -2.140011 |
| 25               | 1                | 0              | 2.906245                | 0.520947  | -0.732838 |

---

**14<sup>Me</sup> (Conformer 1 of 6)**

Sum of electronic and thermal Free Energies = -802.039467 Hartrees

| Center<br>Number | Atomic<br>Number | Atomic<br>Type | Coordinates (Angstroms) |   |   |
|------------------|------------------|----------------|-------------------------|---|---|
|                  |                  |                | X                       | Y | Z |



---

|    |   |   |           |           |           |
|----|---|---|-----------|-----------|-----------|
| 1  | 6 | 0 | -1.974689 | -1.421909 | -0.917055 |
| 2  | 6 | 0 | -0.427061 | -1.223060 | -0.951108 |
| 3  | 6 | 0 | -0.288548 | -0.006839 | -0.010256 |
| 4  | 6 | 0 | -1.782205 | 0.266190  | 0.372020  |
| 5  | 6 | 0 | -2.269404 | -0.840952 | 1.279513  |
| 6  | 6 | 0 | -2.366559 | -1.904926 | 0.474720  |
| 7  | 8 | 0 | -2.409196 | -0.056265 | -0.871801 |
| 8  | 6 | 0 | -1.832794 | 1.750731  | 0.619340  |
| 9  | 8 | 0 | -0.810842 | 2.283890  | -0.253015 |
| 10 | 6 | 0 | 0.036156  | 1.322561  | -0.680785 |
| 11 | 6 | 0 | 0.656318  | -0.184857 | 1.189183  |
| 12 | 6 | 0 | 2.117264  | -0.105307 | 0.800152  |
| 13 | 8 | 0 | 2.909473  | 0.676823  | 1.276884  |
| 14 | 8 | 0 | 2.439489  | -1.006314 | -0.130861 |
| 15 | 8 | 0 | 0.935069  | 1.562465  | -1.446139 |
| 16 | 1 | 0 | -2.405504 | -1.942486 | -1.770266 |
| 17 | 1 | 0 | -0.093440 | -0.986583 | -1.964058 |
| 18 | 1 | 0 | 0.126215  | -2.091359 | -0.591099 |
| 19 | 1 | 0 | -2.378611 | -0.783575 | 2.355565  |
| 20 | 1 | 0 | -2.587070 | -2.931726 | 0.740794  |
| 21 | 1 | 0 | -1.589442 | 2.009986  | 1.653201  |
| 22 | 1 | 0 | -2.785422 | 2.196703  | 0.331181  |
| 23 | 1 | 0 | 0.486154  | 0.590249  | 1.942272  |
| 24 | 1 | 0 | 0.466068  | -1.162683 | 1.644791  |
| 25 | 6 | 0 | 3.785343  | -0.945093 | -0.622989 |
| 26 | 1 | 0 | 3.851262  | -1.715282 | -1.389689 |
| 27 | 1 | 0 | 3.980864  | 0.039596  | -1.052591 |
| 28 | 1 | 0 | 4.494042  | -1.146865 | 0.182942  |

---

**14<sup>Me</sup> (Conformer 2 of 6)**

Sum of electronic and thermal Free Energies = -802.038330 Hartrees

---

| Center<br>Number | Atomic<br>Number | Atomic<br>Type | Coordinates (Angstroms) |           |           |
|------------------|------------------|----------------|-------------------------|-----------|-----------|
|                  |                  |                | X                       | Y         | Z         |
| 1                | 6                | 0              | 0.472571                | 1.996760  | -0.842420 |
| 2                | 6                | 0              | 0.303649                | 0.629804  | -1.575587 |
| 3                | 6                | 0              | 0.611936                | -0.338032 | -0.414462 |
| 4                | 6                | 0              | 0.887637                | 0.655395  | 0.766288  |
| 5                | 6                | 0              | -0.393555               | 1.347268  | 1.177583  |
| 6                | 6                | 0              | -0.667696               | 2.164154  | 0.154293  |
| 7                | 8                | 0              | 1.564423                | 1.684739  | 0.035322  |
| 8                | 6                | 0              | 1.855007                | -0.088260 | 1.646780  |
| 9                | 8                | 0              | 2.605089                | -0.905082 | 0.718044  |
| 10               | 6                | 0              | 1.983976                | -1.001962 | -0.477921 |
| 11               | 6                | 0              | -0.387253               | -1.488388 | -0.169222 |
| 12               | 6                | 0              | -1.772014               | -1.061087 | 0.260154  |
| 13               | 8                | 0              | -2.219033               | -1.223217 | 1.375334  |
| 14               | 8                | 0              | -2.468573               | -0.502322 | -0.733237 |

|    |   |   |           |           |           |
|----|---|---|-----------|-----------|-----------|
| 15 | 8 | 0 | 2.479063  | -1.590311 | -1.404652 |
| 16 | 1 | 0 | 0.711591  | 2.847841  | -1.477195 |
| 17 | 1 | 0 | 1.046042  | 0.535430  | -2.371922 |
| 18 | 1 | 0 | -0.693736 | 0.485348  | -1.991140 |
| 19 | 1 | 0 | -0.989186 | 1.119855  | 2.052413  |
| 20 | 1 | 0 | -1.550170 | 2.773064  | -0.002629 |
| 21 | 1 | 0 | 1.344888  | -0.736955 | 2.364638  |
| 22 | 1 | 0 | 2.559244  | 0.568100  | 2.159312  |
| 23 | 1 | 0 | -0.470089 | -2.064986 | -1.096417 |
| 24 | 1 | 0 | -0.011712 | -2.153824 | 0.613606  |
| 25 | 6 | 0 | -3.781465 | -0.037061 | -0.393091 |
| 26 | 1 | 0 | -4.169087 | 0.432861  | -1.295528 |
| 27 | 1 | 0 | -4.415170 | -0.876372 | -0.098815 |
| 28 | 1 | 0 | -3.727126 | 0.687650  | 0.422823  |

**14<sup>Me</sup> (Conformer 3 of 6)**

Sum of electronic and thermal Free Energies = -802.039622 Hartrees

| Center<br>Number | Atomic<br>Number | Atomic<br>Type | Coordinates (Angstroms) |           |           |
|------------------|------------------|----------------|-------------------------|-----------|-----------|
|                  |                  |                | X                       | Y         | Z         |
| 1                | 6                | 0              | 0.792258                | 1.980588  | -0.868496 |
| 2                | 6                | 0              | 0.669773                | 0.616875  | -1.615789 |
| 3                | 6                | 0              | 0.671660                | -0.349908 | -0.413333 |
| 4                | 6                | 0              | 0.789115                | 0.642106  | 0.794627  |
| 5                | 6                | 0              | -0.493060               | 1.430407  | 0.947194  |
| 6                | 6                | 0              | -0.504879               | 2.245471  | -0.113376 |
| 7                | 8                | 0              | 1.667681                | 1.607377  | 0.205934  |
| 8                | 6                | 0              | 1.510874                | -0.151501 | 1.850047  |
| 9                | 8                | 0              | 2.355936                | -1.045731 | 1.090456  |
| 10               | 6                | 0              | 1.968637                | -1.124889 | -0.201820 |
| 11               | 6                | 0              | -0.453666               | -1.405136 | -0.379795 |
| 12               | 6                | 0              | -1.845550               | -0.821315 | -0.458036 |
| 13               | 8                | 0              | -2.349706               | -0.362504 | -1.459624 |
| 14               | 8                | 0              | -2.479237               | -0.882569 | 0.718718  |
| 15               | 8                | 0              | 2.580295                | -1.776832 | -1.008349 |
| 16               | 1                | 0              | 1.210873                | 2.801389  | -1.447630 |
| 17               | 1                | 0              | 1.542791                | 0.455806  | -2.252729 |
| 18               | 1                | 0              | -0.237310               | 0.536757  | -2.215503 |
| 19               | 1                | 0              | -1.260606               | 1.262744  | 1.691970  |
| 20               | 1                | 0              | -1.296336               | 2.907657  | -0.443536 |
| 21               | 1                | 0              | 0.825058                | -0.742011 | 2.464241  |
| 22               | 1                | 0              | 2.154695                | 0.461570  | 2.481872  |
| 23               | 1                | 0              | -0.324944               | -2.053637 | -1.251921 |
| 24               | 1                | 0              | -0.373460               | -2.020083 | 0.521720  |
| 25               | 6                | 0              | -3.789737               | -0.302395 | 0.751682  |
| 26               | 1                | 0              | -4.137736               | -0.417991 | 1.776871  |
| 27               | 1                | 0              | -3.741510               | 0.754862  | 0.478577  |
| 28               | 1                | 0              | -4.453824               | -0.826812 | 0.061565  |

**14<sup>Me</sup> (Conformer 4 of 6)**

Sum of electronic and thermal Free Energies = -802.040043 Hartrees

| Center Number | Atomic Number | Atomic Type | Coordinates (Angstroms) |           |           |
|---------------|---------------|-------------|-------------------------|-----------|-----------|
|               |               |             | X                       | Y         | Z         |
| 1             | 6             | 0           | -2.839674               | -0.094887 | -0.219584 |
| 2             | 6             | 0           | -1.876694               | 0.418496  | -1.334926 |
| 3             | 6             | 0           | -0.518798               | 0.286810  | -0.607157 |
| 4             | 6             | 0           | -0.972053               | -0.224370 | 0.804327  |
| 5             | 6             | 0           | -1.426294               | -1.661696 | 0.678259  |
| 6             | 6             | 0           | -2.582659               | -1.579948 | 0.010627  |
| 7             | 8             | 0           | -2.210793               | 0.479734  | 0.931977  |
| 8             | 6             | 0           | 0.045055                | 0.358224  | 1.751728  |
| 9             | 8             | 0           | 0.441714                | 1.593026  | 1.116915  |
| 10            | 6             | 0           | 0.132881                | 1.605242  | -0.198423 |
| 11            | 6             | 0           | 0.472041                | -0.597878 | -1.385892 |
| 12            | 6             | 0           | 1.699196                | -0.980190 | -0.592403 |
| 13            | 8             | 0           | 1.943455                | -2.093687 | -0.180115 |
| 14            | 8             | 0           | 2.483296                | 0.077573  | -0.367772 |
| 15            | 8             | 0           | 0.372156                | 2.555294  | -0.898125 |
| 16            | 1             | 0           | -3.875419               | 0.228778  | -0.305152 |
| 17            | 1             | 0           | -2.103915               | 1.459332  | -1.576374 |
| 18            | 1             | 0           | -1.916804               | -0.177554 | -2.249041 |
| 19            | 1             | 0           | -0.851659               | -2.538903 | 0.949464  |
| 20            | 1             | 0           | -3.191050               | -2.387210 | -0.379054 |
| 21            | 1             | 0           | 0.923432                | -0.283157 | 1.876538  |
| 22            | 1             | 0           | -0.377841               | 0.603487  | 2.726675  |
| 23            | 1             | 0           | -0.033540               | -1.518044 | -1.683814 |
| 24            | 1             | 0           | 0.785037                | -0.056124 | -2.284904 |
| 25            | 6             | 0           | 3.639091                | -0.142748 | 0.451657  |
| 26            | 1             | 0           | 4.120403                | 0.828898  | 0.545963  |
| 27            | 1             | 0           | 3.340808                | -0.517465 | 1.433836  |
| 28            | 1             | 0           | 4.309366                | -0.859896 | -0.026453 |

**14<sup>Me</sup> (Conformer 5 of 6)**

Sum of electronic and thermal Free Energies = -802.039562 Hartrees

| Center Number | Atomic Number | Atomic Type | Coordinates (Angstroms) |           |           |
|---------------|---------------|-------------|-------------------------|-----------|-----------|
|               |               |             | X                       | Y         | Z         |
| 1             | 6             | 0           | -2.663222               | -0.801795 | -0.270422 |
| 2             | 6             | 0           | -1.961241               | 0.154444  | -1.284096 |
| 3             | 6             | 0           | -0.612627               | 0.374633  | -0.563171 |
| 4             | 6             | 0           | -0.815363               | -0.466019 | 0.743803  |
| 5             | 6             | 0           | -0.784628               | -1.936845 | 0.391501  |
| 6             | 6             | 0           | -1.930714               | -2.138538 | -0.268370 |
| 7             | 8             | 0           | -2.210177               | -0.232982 | 0.963778  |
| 8             | 6             | 0           | -0.006157               | 0.265870  | 1.783993  |
| 9             | 8             | 0           | -0.048236               | 1.642526  | 1.351243  |
| 10            | 6             | 0           | -0.417538               | 1.755492  | 0.056643  |

|    |   |   |           |           |           |
|----|---|---|-----------|-----------|-----------|
| 11 | 6 | 0 | 0.594377  | 0.016018  | -1.448529 |
| 12 | 6 | 0 | 1.899084  | 0.054611  | -0.688969 |
| 13 | 8 | 0 | 2.475104  | 1.072178  | -0.372766 |
| 14 | 8 | 0 | 2.331884  | -1.168882 | -0.359512 |
| 15 | 8 | 0 | -0.545732 | 2.826430  | -0.477774 |
| 16 | 1 | 0 | -3.750395 | -0.823750 | -0.317500 |
| 17 | 1 | 0 | -2.523804 | 1.086439  | -1.375277 |
| 18 | 1 | 0 | -1.834754 | -0.286058 | -2.275435 |
| 19 | 1 | 0 | 0.052446  | -2.609118 | 0.532122  |
| 20 | 1 | 0 | -2.259947 | -3.032011 | -0.785069 |
| 21 | 1 | 0 | 1.035753  | -0.066014 | 1.825884  |
| 22 | 1 | 0 | -0.452780 | 0.213065  | 2.777643  |
| 23 | 1 | 0 | 0.436975  | -0.977345 | -1.873698 |
| 24 | 1 | 0 | 0.657418  | 0.748983  | -2.258379 |
| 25 | 6 | 0 | 3.546312  | -1.217706 | 0.403986  |
| 26 | 1 | 0 | 3.735791  | -2.273825 | 0.587981  |
| 27 | 1 | 0 | 4.367127  | -0.775039 | -0.163730 |
| 28 | 1 | 0 | 3.423726  | -0.680469 | 1.347492  |

**14<sup>Me</sup> (Conformer 6 of 6)**

Sum of electronic and thermal Free Energies = -802.040279 Hartrees

| Center<br>Number | Atomic<br>Number | Atomic<br>Type | Coordinates (Angstroms) |           |           |
|------------------|------------------|----------------|-------------------------|-----------|-----------|
|                  |                  |                | X                       | Y         | Z         |
| 1                | 6                | 0              | 2.318053                | -1.027225 | 0.979787  |
| 2                | 6                | 0              | 0.766541                | -1.101843 | 1.139070  |
| 3                | 6                | 0              | 0.338311                | -0.074451 | 0.070693  |
| 4                | 6                | 0              | 1.720473                | 0.400352  | -0.488372 |
| 5                | 6                | 0              | 2.340397                | -0.721150 | -1.290946 |
| 6                | 6                | 0              | 2.692388                | -1.626182 | -0.371029 |
| 7                | 8                | 0              | 2.484251                | 0.373790  | 0.719782  |
| 8                | 6                | 0              | 1.468115                | 1.818651  | -0.928193 |
| 9                | 8                | 0              | 0.427629                | 2.281539  | -0.036959 |
| 10               | 6                | 0              | -0.180447               | 1.256392  | 0.599653  |
| 11               | 6                | 0              | -0.642748               | -0.595354 | -0.993462 |
| 12               | 6                | 0              | -2.002535               | -0.838007 | -0.376899 |
| 13               | 8                | 0              | -2.268390               | -1.772547 | 0.347400  |
| 14               | 8                | 0              | -2.875567               | 0.116273  | -0.704070 |
| 15               | 8                | 0              | -1.036258               | 1.437628  | 1.427494  |
| 16               | 1                | 0              | 2.899143                | -1.336649 | 1.846368  |
| 17               | 1                | 0              | 0.470003                | -0.785830 | 2.141905  |
| 18               | 1                | 0              | 0.358576                | -2.095667 | 0.947223  |
| 19               | 1                | 0              | 2.358289                | -0.800503 | -2.370982 |
| 20               | 1                | 0              | 3.079532                | -2.626265 | -0.524710 |
| 21               | 1                | 0              | 1.106443                | 1.875530  | -1.958479 |
| 22               | 1                | 0              | 2.335742                | 2.465818  | -0.794784 |
| 23               | 1                | 0              | -0.735401               | 0.119504  | -1.816783 |
| 24               | 1                | 0              | -0.266922               | -1.546950 | -1.378415 |
| 25               | 6                | 0              | -4.158343               | 0.034644  | -0.067526 |
| 26               | 1                | 0              | -4.715578               | 0.900893  | -0.419534 |
| 27               | 1                | 0              | -4.664893               | -0.889202 | -0.354984 |

28            1            0            -4.039483    0.070898    1.017330

---

**14' (Conformer 1 of 5)**

Sum of electronic and thermal Free Energies = -762.771185 Hartrees

---

| Center<br>Number | Atomic<br>Number | Atomic<br>Type | Coordinates (Angstroms) |           |           |
|------------------|------------------|----------------|-------------------------|-----------|-----------|
|                  |                  |                | X                       | Y         | Z         |
| 1                | 6                | 0              | -2.490302               | -0.008542 | -0.233572 |
| 2                | 6                | 0              | -1.504211               | 0.833473  | -1.109598 |
| 3                | 6                | 0              | -0.145807               | 0.467820  | -0.433818 |
| 4                | 6                | 0              | -0.621923               | -0.605637 | 0.589215  |
| 5                | 6                | 0              | -1.128676               | -1.812624 | -0.204538 |
| 6                | 6                | 0              | -2.314286               | -1.446132 | -0.688598 |
| 7                | 6                | 0              | 0.981017                | -0.155501 | -1.249147 |
| 8                | 6                | 0              | 1.991948                | -0.873771 | -0.359804 |
| 9                | 8                | 0              | 1.683717                | -1.211505 | 0.909755  |
| 10               | 6                | 0              | 0.444559                | -0.922775 | 1.604002  |
| 11               | 8                | 0              | -1.831952               | -0.021280 | 1.049331  |
| 12               | 6                | 0              | 0.357019                | 1.738527  | 0.249209  |
| 13               | 8                | 0              | 0.858545                | 2.592301  | -0.659664 |
| 14               | 8                | 0              | 0.307706                | 2.008651  | 1.425683  |
| 15               | 8                | 0              | 3.082937                | -1.186709 | -0.776691 |
| 16               | 1                | 0              | -3.500160               | 0.385357  | -0.142533 |
| 17               | 1                | 0              | -1.719872               | 1.900953  | -1.024564 |
| 18               | 1                | 0              | -1.540316               | 0.553567  | -2.164457 |
| 19               | 1                | 0              | -0.575396               | -2.732862 | -0.357190 |
| 20               | 1                | 0              | -2.980434               | -1.984955 | -1.351562 |
| 21               | 1                | 0              | 1.537169                | 0.567342  | -1.848250 |
| 22               | 1                | 0              | 0.581456                | -0.909208 | -1.936044 |
| 23               | 1                | 0              | 0.208910                | -1.827710 | 2.167216  |
| 24               | 1                | 0              | 0.621532                | -0.094104 | 2.288291  |
| 25               | 1                | 0              | 1.143443                | 3.400927  | -0.198312 |

---

**14' (Conformer 2 of 5)**

Sum of electronic and thermal Free Energies = -762.775155 Hartrees

---

| Center<br>Number | Atomic<br>Number | Atomic<br>Type | Coordinates (Angstroms) |           |           |
|------------------|------------------|----------------|-------------------------|-----------|-----------|
|                  |                  |                | X                       | Y         | Z         |
| 1                | 6                | 0              | -2.480600               | -0.262585 | -0.192880 |
| 2                | 6                | 0              | -1.592236               | 0.470723  | -1.260023 |
| 3                | 6                | 0              | -0.200897               | 0.383743  | -0.587350 |
| 4                | 6                | 0              | -0.550051               | -0.534080 | 0.649419  |
| 5                | 6                | 0              | -0.955518               | -1.905579 | 0.117844  |
| 6                | 6                | 0              | -2.183123               | -1.739874 | -0.374983 |
| 7                | 6                | 0              | 0.973339                | -0.274876 | -1.295711 |
| 8                | 6                | 0              | 2.068193                | -0.701794 | -0.324521 |
| 9                | 8                | 0              | 1.794435                | -0.899827 | 0.987156  |

|    |   |   |           |           |           |
|----|---|---|-----------|-----------|-----------|
| 10 | 6 | 0 | 0.572459  | -0.520469 | 1.650263  |
| 11 | 8 | 0 | -1.790723 | 0.021456  | 1.042253  |
| 12 | 6 | 0 | 0.279533  | 1.731850  | -0.062516 |
| 13 | 8 | 0 | -0.689224 | 2.592698  | 0.256118  |
| 14 | 8 | 0 | 1.455175  | 1.996485  | 0.085379  |
| 15 | 8 | 0 | 3.185533  | -0.956241 | -0.705992 |
| 16 | 1 | 0 | -3.519073 | 0.055166  | -0.133928 |
| 17 | 1 | 0 | -1.910567 | 1.503402  | -1.397423 |
| 18 | 1 | 0 | -1.618756 | -0.040671 | -2.224309 |
| 19 | 1 | 0 | -0.318659 | -2.782754 | 0.109851  |
| 20 | 1 | 0 | -2.809436 | -2.449541 | -0.901979 |
| 21 | 1 | 0 | 1.447016  | 0.371528  | -2.036969 |
| 22 | 1 | 0 | 0.640940  | -1.183221 | -1.809545 |
| 23 | 1 | 0 | 0.424601  | -1.256945 | 2.441798  |
| 24 | 1 | 0 | 0.708513  | 0.467477  | 2.101236  |
| 25 | 1 | 0 | -0.272737 | 3.396649  | 0.614702  |

**14' (Conformer 3 of 5)**

Sum of electronic and thermal Free Energies = -762.775381 Hartrees

| Center<br>Number | Atomic<br>Number | Atomic<br>Type | Coordinates (Angstroms) |           |           |
|------------------|------------------|----------------|-------------------------|-----------|-----------|
|                  |                  |                | X                       | Y         | Z         |
| 1                | 6                | 0              | -2.463119               | -0.227341 | -0.308929 |
| 2                | 6                | 0              | -1.512816               | 0.490784  | -1.327889 |
| 3                | 6                | 0              | -0.150092               | 0.374875  | -0.587816 |
| 4                | 6                | 0              | -0.563505               | -0.521461 | 0.629810  |
| 5                | 6                | 0              | -0.980327               | -1.888426 | 0.109070  |
| 6                | 6                | 0              | -2.178036               | -1.708082 | -0.447669 |
| 7                | 6                | 0              | 1.031748                | -0.295933 | -1.260754 |
| 8                | 6                | 0              | 2.085773                | -0.728505 | -0.249645 |
| 9                | 8                | 0              | 1.770072                | -0.865264 | 1.062537  |
| 10               | 6                | 0              | 0.517985                | -0.498691 | 1.677634  |
| 11               | 8                | 0              | -1.824069               | 0.068606  | 0.962464  |
| 12               | 6                | 0              | 0.292577                | 1.756226  | -0.079236 |
| 13               | 8                | 0              | -0.574594               | 2.430710  | 0.683697  |
| 14               | 8                | 0              | 1.370405                | 2.235007  | -0.343966 |
| 15               | 8                | 0              | 3.207588                | -1.019658 | -0.584933 |
| 16               | 1                | 0              | -3.498615               | 0.104386  | -0.298090 |
| 17               | 1                | 0              | -1.807372               | 1.531156  | -1.483462 |
| 18               | 1                | 0              | -1.501585               | -0.013748 | -2.295710 |
| 19               | 1                | 0              | -0.364324               | -2.779313 | 0.149783  |
| 20               | 1                | 0              | -2.794091               | -2.416037 | -0.988232 |
| 21               | 1                | 0              | 1.532805                | 0.348652  | -1.983951 |
| 22               | 1                | 0              | 0.709490                | -1.202942 | -1.783356 |
| 23               | 1                | 0              | 0.347259                | -1.233952 | 2.465563  |
| 24               | 1                | 0              | 0.631029                | 0.491360  | 2.131861  |
| 25               | 1                | 0              | -1.330937               | 1.854552  | 0.919746  |

**14' (Conformer 4 of 5)**

Sum of electronic and thermal Free Energies = -762.764586 Hartrees

| Center<br>Number | Atomic<br>Number | Atomic<br>Type | Coordinates (Angstroms) |           |           |
|------------------|------------------|----------------|-------------------------|-----------|-----------|
|                  |                  |                | X                       | Y         | Z         |
| 1                | 6                | 0              | -2.490574               | -0.059300 | -0.192872 |
| 2                | 6                | 0              | -1.539817               | 0.831915  | -1.060784 |
| 3                | 6                | 0              | -0.160742               | 0.488007  | -0.412253 |
| 4                | 6                | 0              | -0.593731               | -0.637542 | 0.577255  |
| 5                | 6                | 0              | -1.086279               | -1.827051 | -0.251493 |
| 6                | 6                | 0              | -2.290330               | -1.476037 | -0.699076 |
| 7                | 6                | 0              | 0.976364                | -0.083667 | -1.256075 |
| 8                | 6                | 0              | 2.016229                | -0.804962 | -0.400117 |
| 9                | 8                | 0              | 1.728508                | -1.203934 | 0.852966  |
| 10               | 6                | 0              | 0.487615                | -0.982095 | 1.567930  |
| 11               | 8                | 0              | -1.808010               | -0.095972 | 1.075694  |
| 12               | 6                | 0              | 0.326891                | 1.750208  | 0.311894  |
| 13               | 8                | 0              | 0.657821                | 2.774120  | -0.500086 |
| 14               | 8                | 0              | 0.428347                | 1.900803  | 1.502228  |
| 15               | 8                | 0              | 3.110904                | -1.064941 | -0.842434 |
| 16               | 1                | 0              | -3.506368               | 0.310360  | -0.072569 |
| 17               | 1                | 0              | -1.791910               | 1.888327  | -0.939503 |
| 18               | 1                | 0              | -1.590435               | 0.577201  | -2.121732 |
| 19               | 1                | 0              | -0.513695               | -2.728102 | -0.442544 |
| 20               | 1                | 0              | -2.958223               | -2.009366 | -1.364642 |
| 21               | 1                | 0              | 1.525615                | 0.653868  | -1.846837 |
| 22               | 1                | 0              | 0.585678                | -0.824597 | -1.961968 |
| 23               | 1                | 0              | 0.274230                | -1.923636 | 2.077472  |
| 24               | 1                | 0              | 0.651540                | -0.190447 | 2.295947  |
| 25               | 1                | 0              | 0.509253                | 2.568938  | -1.437015 |

#### 14' (Conformer 5 of 5)

Sum of electronic and thermal Free Energies = -762.774950 Hartrees

| Center<br>Number | Atomic<br>Number | Atomic<br>Type | Coordinates (Angstroms) |           |           |
|------------------|------------------|----------------|-------------------------|-----------|-----------|
|                  |                  |                | X                       | Y         | Z         |
| 1                | 6                | 0              | -2.511846               | -0.161894 | -0.165192 |
| 2                | 6                | 0              | -1.611882               | 0.559523  | -1.228214 |
| 3                | 6                | 0              | -0.217710               | 0.420900  | -0.572168 |
| 4                | 6                | 0              | -0.582572               | -0.508131 | 0.650747  |
| 5                | 6                | 0              | -1.036905               | -1.857207 | 0.098689  |
| 6                | 6                | 0              | -2.264568               | -1.644899 | -0.374616 |
| 7                | 6                | 0              | 0.930091                | -0.263633 | -1.303713 |
| 8                | 6                | 0              | 2.004956                | -0.788467 | -0.356116 |
| 9                | 8                | 0              | 1.741541                | -0.991174 | 0.955559  |
| 10               | 6                | 0              | 0.547473                | -0.563567 | 1.641061  |
| 11               | 8                | 0              | -1.799356               | 0.079816  | 1.067166  |
| 12               | 6                | 0              | 0.222181                | 1.780934  | -0.033791 |
| 13               | 8                | 0              | 1.551583                | 1.839603  | 0.167390  |
| 14               | 8                | 0              | -0.505049               | 2.713180  | 0.211612  |

|    |   |   |           |           |           |
|----|---|---|-----------|-----------|-----------|
| 15 | 8 | 0 | 3.098872  | -1.102428 | -0.761327 |
| 16 | 1 | 0 | -3.538420 | 0.188850  | -0.088978 |
| 17 | 1 | 0 | -1.891501 | 1.607662  | -1.330629 |
| 18 | 1 | 0 | -1.668094 | 0.070502  | -2.202534 |
| 19 | 1 | 0 | -0.428899 | -2.754307 | 0.069963  |
| 20 | 1 | 0 | -2.920383 | -2.325630 | -0.903952 |
| 21 | 1 | 0 | 1.435286  | 0.382997  | -2.024083 |
| 22 | 1 | 0 | 0.553815  | -1.133472 | -1.852967 |
| 23 | 1 | 0 | 0.371715  | -1.307974 | 2.419459  |
| 24 | 1 | 0 | 0.736840  | 0.406772  | 2.110061  |
| 25 | 1 | 0 | 1.773599  | 2.711273  | 0.540324  |

---

**14'<sup>Me</sup> (Conformer 1 of 3)**

Sum of electronic and thermal Free Energies = -802.026187 Hartrees

| Center<br>Number | Atomic<br>Number | Atomic<br>Type | Coordinates (Angstroms) |           |           |
|------------------|------------------|----------------|-------------------------|-----------|-----------|
|                  |                  |                | X                       | Y         | Z         |
| 1                | 6                | 0              | 1.778886                | -1.895953 | -0.242470 |
| 2                | 6                | 0              | 0.500555                | -1.619859 | -1.101827 |
| 3                | 6                | 0              | -0.018310               | -0.312922 | -0.425758 |
| 4                | 6                | 0              | 1.140309                | -0.041027 | 0.579156  |
| 5                | 6                | 0              | 2.397840                | 0.277519  | -0.233961 |
| 6                | 6                | 0              | 2.813928                | -0.891799 | -0.717404 |
| 7                | 6                | 0              | -0.207317               | 0.957756  | -1.245243 |
| 8                | 6                | 0              | -0.235842               | 2.200832  | -0.361160 |
| 9                | 8                | 0              | 0.237354                | 2.165056  | 0.902209  |
| 10               | 6                | 0              | 0.765476                | 1.005999  | 1.594207  |
| 11               | 8                | 0              | 1.410945                | -1.356103 | 1.042970  |
| 12               | 6                | 0              | -1.327449               | -0.672124 | 0.281553  |
| 13               | 8                | 0              | -2.320105               | -0.769608 | -0.611460 |
| 14               | 8                | 0              | -1.484606               | -0.883341 | 1.462047  |
| 15               | 8                | 0              | -0.653500               | 3.257246  | -0.775959 |
| 16               | 1                | 0              | 2.073953                | -2.939015 | -0.149874 |
| 17               | 1                | 0              | -0.220314               | -2.434629 | -1.003285 |
| 18               | 1                | 0              | 0.732487                | -1.486111 | -2.160600 |
| 19               | 1                | 0              | 2.795594                | 1.273297  | -0.396235 |
| 20               | 1                | 0              | 3.636767                | -1.102127 | -1.389895 |
| 21               | 1                | 0              | -1.125456               | 0.961903  | -1.834509 |
| 22               | 1                | 0              | 0.628530                | 1.091487  | -1.940361 |
| 23               | 1                | 0              | 1.637646                | 1.367136  | 2.142294  |
| 24               | 1                | 0              | 0.008031                | 0.649689  | 2.291167  |
| 25               | 6                | 0              | -3.598411               | -1.161515 | -0.090998 |
| 26               | 1                | 0              | -4.269173               | -1.183838 | -0.948214 |
| 27               | 1                | 0              | -3.531225               | -2.150098 | 0.368057  |
| 28               | 1                | 0              | -3.945531               | -0.435149 | 0.646426  |

---

**14'<sup>Me</sup> (Conformer 2 of 3)**

Sum of electronic and thermal Free Energies = -802.028887 Hartrees



| Center<br>Number | Atomic<br>Number | Atomic<br>Type | Coordinates (Angstroms) |           |           |
|------------------|------------------|----------------|-------------------------|-----------|-----------|
|                  |                  |                | X                       | Y         | Z         |
| 1                | 6                | 0              | 0.493355                | 2.479237  | -0.193309 |
| 2                | 6                | 0              | 0.684817                | 1.419346  | -1.335833 |
| 3                | 6                | 0              | 0.112046                | 0.153238  | -0.655546 |
| 4                | 6                | 0              | -0.453385               | 0.787873  | 0.674160  |
| 5                | 6                | 0              | -1.586743               | 1.738300  | 0.299856  |
| 6                | 6                | 0              | -0.987096               | 2.815096  | -0.208114 |
| 7                | 6                | 0              | -1.035946               | -0.622533 | -1.284419 |
| 8                | 6                | 0              | -1.767601               | -1.494654 | -0.270603 |
| 9                | 8                | 0              | -1.710306               | -1.216418 | 1.053954  |
| 10               | 6                | 0              | -0.799205               | -0.285150 | 1.669604  |
| 11               | 8                | 0              | 0.596385                | 1.678666  | 1.003302  |
| 12               | 6                | 0              | 1.194085                | -0.857355 | -0.280678 |
| 13               | 8                | 0              | 2.403406                | -0.336010 | -0.103168 |
| 14               | 8                | 0              | 0.953136                | -2.038868 | -0.125920 |
| 15               | 8                | 0              | -2.486321               | -2.400641 | -0.619835 |
| 16               | 1                | 0              | 1.211986                | 3.295548  | -0.170890 |
| 17               | 1                | 0              | 1.736688                | 1.298134  | -1.590515 |
| 18               | 1                | 0              | 0.129448                | 1.695226  | -2.234511 |
| 19               | 1                | 0              | -2.643103               | 1.512521  | 0.390959  |
| 20               | 1                | 0              | -1.430123               | 3.698030  | -0.652858 |
| 21               | 1                | 0              | -0.717217               | -1.282576 | -2.093414 |
| 22               | 1                | 0              | -1.779675               | 0.070092  | -1.692951 |
| 23               | 1                | 0              | -1.327650               | 0.115868  | 2.536135  |
| 24               | 1                | 0              | 0.086162                | -0.831426 | 2.009044  |
| 25               | 6                | 0              | 3.420911                | -1.248218 | 0.335345  |
| 26               | 1                | 0              | 4.329613                | -0.654397 | 0.416926  |
| 27               | 1                | 0              | 3.151880                | -1.670953 | 1.305733  |
| 28               | 1                | 0              | 3.550163                | -2.050981 | -0.393102 |

**14'<sup>Me</sup> (Conformer 3 of 3)**

Sum of electronic and thermal Free Energies = -802.029713 Hartrees

| Center<br>Number | Atomic<br>Number | Atomic<br>Type | Coordinates (Angstroms) |           |           |
|------------------|------------------|----------------|-------------------------|-----------|-----------|
|                  |                  |                | X                       | Y         | Z         |
| 1                | 6                | 0              | 2.535369                | -0.901501 | -0.098022 |
| 2                | 6                | 0              | 1.486336                | -1.032706 | -1.256971 |
| 3                | 6                | 0              | 0.272737                | -0.302847 | -0.635295 |
| 4                | 6                | 0              | 0.935158                | 0.254604  | 0.683244  |
| 5                | 6                | 0              | 2.008367                | 1.265107  | 0.285367  |
| 6                | 6                | 0              | 3.026795                | 0.533343  | -0.166049 |
| 7                | 6                | 0              | -0.365767               | 0.891218  | -1.332938 |
| 8                | 6                | 0              | -1.152158               | 1.780148  | -0.374752 |
| 9                | 8                | 0              | -0.913730               | 1.751037  | 0.957702  |
| 10               | 6                | 0              | -0.110811               | 0.763958  | 1.636067  |
| 11               | 8                | 0              | 1.701679                | -0.866118 | 1.080239  |
| 12               | 6                | 0              | -0.788399               | -1.333383 | -0.244674 |
| 13               | 8                | 0              | -1.993050               | -0.767126 | -0.086558 |
| 14               | 8                | 0              | -0.592401               | -2.513601 | -0.070670 |

|    |   |   |           |           |           |
|----|---|---|-----------|-----------|-----------|
| 15 | 8 | 0 | -1.954956 | 2.586748  | -0.780742 |
| 16 | 1 | 0 | 3.270090  | -1.700103 | -0.023249 |
| 17 | 1 | 0 | 1.251241  | -2.077990 | -1.454913 |
| 18 | 1 | 0 | 1.838378  | -0.557781 | -2.174755 |
| 19 | 1 | 0 | 1.894120  | 2.342381  | 0.326104  |
| 20 | 1 | 0 | 3.962495  | 0.860535  | -0.603149 |
| 21 | 1 | 0 | -1.050601 | 0.612439  | -2.136228 |
| 22 | 1 | 0 | 0.413059  | 1.525046  | -1.771284 |
| 23 | 1 | 0 | 0.331405  | 1.280673  | 2.489643  |
| 24 | 1 | 0 | -0.764219 | -0.035272 | 1.999650  |
| 25 | 6 | 0 | -3.046540 | -1.631877 | 0.360714  |
| 26 | 1 | 0 | -3.929806 | -1.000679 | 0.439951  |
| 27 | 1 | 0 | -3.209876 | -2.431644 | -0.364173 |
| 28 | 1 | 0 | -2.793146 | -2.061518 | 1.332487  |

---

**15a<sup>Me</sup>** (lowest energy DFT optimized conformer)

Sum of electronic and thermal Free Energies = -802.046831 Hartrees

| Center<br>Number | Atomic<br>Number | Atomic<br>Type | Coordinates (Angstroms) |           |           |
|------------------|------------------|----------------|-------------------------|-----------|-----------|
|                  |                  |                | X                       | Y         | Z         |
| 1                | 6                | 0              | 5.022336                | 0.447726  | -0.138550 |
| 2                | 8                | 0              | 3.794204                | 0.415000  | -0.712345 |
| 3                | 6                | 0              | 3.095972                | -0.591837 | -0.120765 |
| 4                | 6                | 0              | 3.866633                | -1.201480 | 0.819985  |
| 5                | 6                | 0              | 5.130102                | -0.521899 | 0.807262  |
| 6                | 6                | 0              | 1.711650                | -0.816573 | -0.596211 |
| 7                | 8                | 0              | 0.887311                | 0.259941  | -0.103625 |
| 8                | 6                | 0              | -0.392763               | 0.227718  | -0.488221 |
| 9                | 6                | 0              | -1.210166               | 1.361924  | 0.035796  |
| 10               | 8                | 0              | -0.852711               | -0.640848 | -1.202081 |
| 11               | 6                | 0              | -2.670090               | 1.273727  | -0.304495 |
| 12               | 6                | 0              | -0.660748               | 2.360438  | 0.728646  |
| 13               | 6                | 0              | -3.310696               | 0.035367  | 0.284956  |
| 14               | 8                | 0              | -4.437699               | -0.284904 | -0.357878 |
| 15               | 8                | 0              | -2.890117               | -0.578485 | 1.240232  |
| 16               | 6                | 0              | -5.145784               | -1.422365 | 0.152449  |
| 17               | 1                | 0              | 5.698363                | 1.204304  | -0.508109 |
| 18               | 1                | 0              | 3.567605                | -2.031613 | 1.444457  |
| 19               | 1                | 0              | 5.996729                | -0.729086 | 1.418094  |
| 20               | 1                | 0              | 1.659744                | -0.827805 | -1.688618 |
| 21               | 1                | 0              | 1.333773                | -1.767000 | -0.212059 |
| 22               | 1                | 0              | -3.203116               | 2.142045  | 0.096585  |
| 23               | 1                | 0              | -2.825851               | 1.259133  | -1.387110 |
| 24               | 1                | 0              | -1.270946               | 3.179055  | 1.099682  |
| 25               | 1                | 0              | 0.403315                | 2.384476  | 0.938731  |
| 26               | 1                | 0              | -6.026897               | -1.526907 | -0.478438 |
| 27               | 1                | 0              | -4.521520               | -2.315836 | 0.086141  |
| 28               | 1                | 0              | -5.437770               | -1.252878 | 1.191098  |

---

**15b<sup>Me</sup>** (lowest energy DFT optimized conformer)

Sum of electronic and thermal Free Energies = -802.045324 Hartrees

---

| Center<br>Number | Atomic<br>Number | Atomic<br>Type | Coordinates (Angstroms) |           |           |
|------------------|------------------|----------------|-------------------------|-----------|-----------|
|                  |                  |                | X                       | Y         | Z         |
| 1                | 6                | 0              | -4.832878               | 0.558641  | -0.125657 |
| 2                | 8                | 0              | -3.895749               | -0.127245 | -0.824259 |
| 3                | 6                | 0              | -2.978884               | -0.591826 | 0.070363  |
| 4                | 6                | 0              | -3.325885               | -0.208349 | 1.329042  |
| 5                | 6                | 0              | -4.541516               | 0.541977  | 1.201905  |
| 6                | 6                | 0              | -1.843128               | -1.370792 | -0.484684 |
| 7                | 8                | 0              | -0.859448               | -0.518042 | -1.108871 |
| 8                | 6                | 0              | 0.013792                | 0.083414  | -0.287943 |
| 9                | 6                | 0              | 0.947974                | 0.996854  | -1.051255 |
| 10               | 8                | 0              | 0.021842                | -0.068519 | 0.912287  |
| 11               | 6                | 0              | 2.258682                | 1.166320  | -0.337054 |
| 12               | 6                | 0              | 3.013203                | -0.108104 | -0.141906 |
| 13               | 6                | 0              | 2.734534                | 2.336803  | 0.090262  |
| 14               | 8                | 0              | 4.158425                | 0.035311  | 0.527993  |
| 15               | 8                | 0              | 2.614314                | -1.176437 | -0.561704 |
| 16               | 6                | 0              | 4.900784                | -1.169426 | 0.756065  |
| 17               | 1                | 0              | -5.634981               | 0.991072  | -0.705065 |
| 18               | 1                | 0              | -2.771545               | -0.428458 | 2.230363  |
| 19               | 1                | 0              | -5.116067               | 1.005522  | 1.990720  |
| 20               | 1                | 0              | -1.368567               | -1.955776 | 0.304363  |
| 21               | 1                | 0              | -2.179311               | -2.030201 | -1.285985 |
| 22               | 1                | 0              | 1.092025                | 0.586658  | -2.054624 |
| 23               | 1                | 0              | 0.444639                | 1.964183  | -1.153000 |
| 24               | 1                | 0              | 3.692951                | 2.407432  | 0.593519  |
| 25               | 1                | 0              | 2.168646                | 3.252428  | -0.056428 |
| 26               | 1                | 0              | 5.788946                | -0.865554 | 1.307610  |
| 27               | 1                | 0              | 4.307709                | -1.872435 | 1.344618  |
| 28               | 1                | 0              | 5.180429                | -1.628482 | -0.194490 |

---

## V. Discussion of NMR-based assignment of relative configuration to 4-exo vs. 4-endo, including comparisons between computed and experimental chemical shifts

To assign the structure of the endo vs. exo stereoisomers in these series of compounds, we carried out the following sequence of experiments. First, the equilibrium mixture of products **4** was dissolved in acetone and *quickly* exposed to 10% Pd/C and hydrogen gas (1 atm) in order to saturate the alkene, thereby arresting further cycloreversion to itaconic anhydride (**1**) and furan (**3**), a process that is promoted by the simple act of dilution. The diastereomeric saturated analogs **4-h2** were chromatographically separated and individually characterized.

Second, in order to correlate which isomer of **4-h2** came from which isomer of the alkene adducts **4** it was necessary to separate the latter pair. A mixture of the exo- and endo-isomers of **4** was *quickly* chromatographed on SiO<sub>2</sub> (MPLC), and <sup>1</sup>H NMR data were collected for each (in both CDCl<sub>3</sub> and C<sub>6</sub>D<sub>6</sub>). A sample of the **slower** eluting isomer of **4**, immediately following chromatographic separation, was then *quickly* reduced by H<sub>2</sub> to give the same isomer of **4-h2**, that eluted more slowly, thereby allowing the correlation of the two slower eluting isomers of each pair.

To aid in the assignment of relative configuration of each of the diastereomeric pairs, the NMR chemical shifts of each of the four structures of **4** and **4-h2** were computed in Gaussian 09<sup>4</sup> using DFT [B3LYP/6-311+G(2d,p)//M06-2X<sup>3</sup>/6-31+G(d,p), both using SMD<sup>5</sup>:CHCl<sub>3</sub>]. Optimizations were run using an “ultrafine” integration grid and were subjected to a “tight” cutoff. A multiconformational search (carried out in MacroModel, version 10.7) resulted in only a single minimum energy conformation for each of these rigid anhydrides, making Boltzmann averaging unnecessary. Experimental and computed values were then compared (Tables S2-H to S5-H and S2-C to S5-C). In order to reduce error, least-squares linear regression analysis of the experimental vs. the computed chemical shifts ( $\delta_{\text{exp}}$  and  $\delta_{\text{comp}}$ , respectively) was carried out for each isomer. The corrected chemical shift values ( $\delta_{\text{corr}}$ ) were extracted from the resulting linear equation ( $\delta_{\text{corr}} = \text{slope} \times \delta_{\text{comp}} + \text{intercept}$ ). The corresponding corrected mean absolute error (CMAE) for the sets of both the carbon and, especially, the proton chemical shifts (Figures S10 and S11) suggested that the structure of the faster eluting isomer in each pair was **4-endo-h2** and **4-endo**, while that of the less chromatographically mobile isomer was **4-exo-h2** and **4-exo**.

It is worth noting that NOE experiments did not provide a definitive basis for confidently assigning either of these pairs of exo- and endo-diastereomers. Finally, these structural assignments were confirmed by the X-ray diffraction analysis of the diacid **5** derived from the faster eluting, hydrogenated compound—**4-endo-h2** (cf. Figure 1b in the manuscript). When this anhydride was added to hot D<sub>2</sub>O (or incubated in a homogenous solution of aqueous acetone), it smoothly opened to the diacid **5** (see details in the SI above).

Diagnostic features in the <sup>1</sup>H NMR spectral data of each diastereomer of **4** were then useful to assess and deduce the relative configuration of the DA adducts prepared from additional furan derivatives (cf. **7**, **9**, and **11** in Table 1). As shown in Figure S9, these include (i) the multiplicity

of the bridgehead proton adjacent to vs. remote from the spirocyclic quaternary carbon [H1 in, e.g., **4-exo** was a simple doublet ( $J = \text{ca. } 2 \text{ Hz}$ ) whereas H4 was a dd ( $J = \text{ca. } 5 \text{ and } 2 \text{ Hz}$ ) showing coupling to H3<sub>x</sub> but not H3<sub>n</sub>, because the H4/H3<sub>n</sub> dihedral angle is near 90°] and (ii) the differences in chemical shifts of the diastereotopic methylene protons at C3 and C4' as well as the  $\delta_{\text{rel}}$  values for the bridgehead protons, when present. Because the equilibrium concentration for all of these adducts was typically low (5–20%, Table 1), their spectral data were recorded and analyzed from a mixture of the endo and exo adducts along with the excess diene (i.e., furan derivative) and remaining IA (**1**) (cf. Figure 1 and Figures S1-S4).

**Figure S9. Diagnostic trends in NMR data that for 4-exo vs. 4-endo that were used to deduce and assign the relative configuration within DA adducts 7, 9, and 11.**

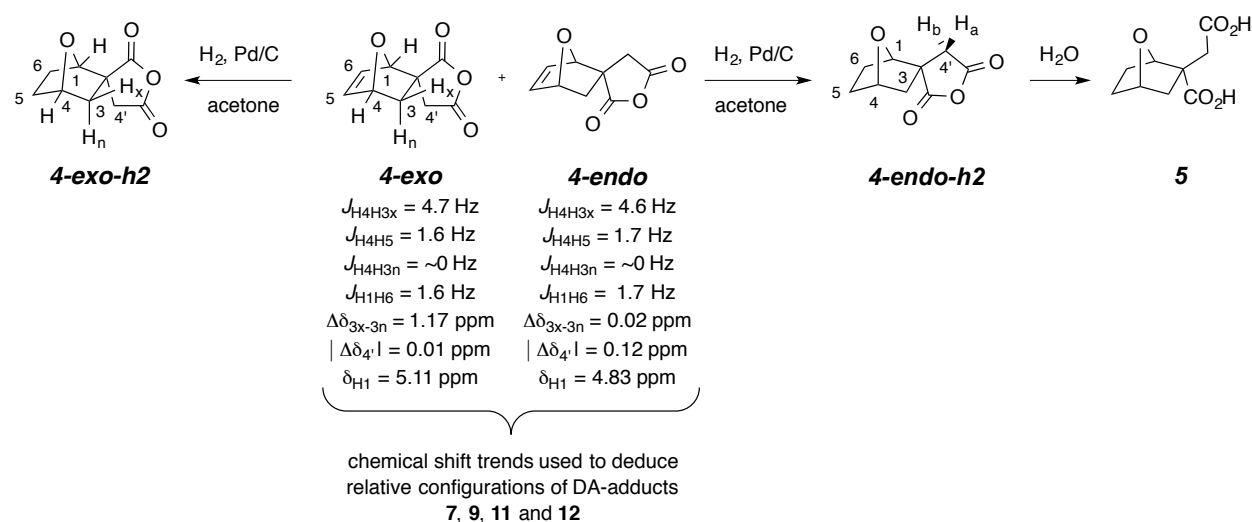

## Geometries and energies of 4-endo-h2, 4-exo-h2, 4-endo, and 4-exo.

## 4-endo-h2

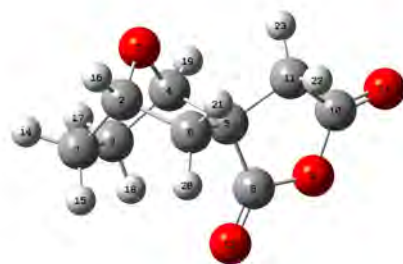

E(RM062X): -649.674257 Hartrees

E(RB3LYP): -650.095958 Hartrees

Sum of electronic and thermal Free Energies: -649.523999 Hartrees

| Atom # | Atom Type | Cartesian Coordinates (x,y,z) |           |           | NMR<br>Shielding<br>Tensor | Scaled<br>NMR Shift |
|--------|-----------|-------------------------------|-----------|-----------|----------------------------|---------------------|
| 1      | C         | 2.764341                      | 0.533248  | -0.140383 | 151.075                    | 32.88               |
| 2      | C         | 2.218924                      | -0.68293  | 0.626644  | 99.252                     | 84.703              |
| 3      | C         | 1.721632                      | 0.659103  | -1.283448 | 154.9588                   | 28.9962             |
| 4      | C         | 0.766623                      | -0.492547 | -0.944009 | 92.1811                    | 91.7739             |
| 5      | C         | -0.103705                     | -0.188865 | 0.327881  | 121.4959                   | 62.4591             |
| 6      | C         | 0.975119                      | -0.276208 | 1.437394  | 135.4934                   | 48.4616             |
| 7      | O         | 1.642788                      | -1.486929 | -0.419389 |                            |                     |
| 8      | C         | -0.813233                     | 1.143299  | 0.241277  | -3.0853                    | 187.0403            |
| 9      | O         | -2.127898                     | 0.946619  | -0.129566 |                            |                     |
| 10     | C         | -2.444782                     | -0.398395 | -0.113392 | 1.4778                     | 182.4772            |
| 11     | C         | -1.272654                     | -1.171258 | 0.432348  | 134.7271                   | 49.2279             |
| 12     | O         | -0.390571                     | 2.247867  | 0.423793  |                            |                     |
| 13     | O         | -3.521859                     | -0.774601 | -0.470177 |                            |                     |
| 14     | H         | 3.762574                      | 0.32743   | -0.532679 | 30.0844                    | 1.7569              |
| 15     | H         | 2.81304                       | 1.423485  | 0.491057  | 30.1772                    | 1.6641              |
| 16     | H         | 2.95557                       | -1.269276 | 1.174875  | 27.2002                    | 4.6411              |
| 17     | H         | 2.175047                      | 0.461447  | -2.257082 | 30.2617                    | 1.5796              |
| 18     | H         | 1.233522                      | 1.633632  | -1.323592 | 29.8478                    | 1.9935              |
| 19     | H         | 0.189079                      | -0.894681 | -1.77848  | 27.4877                    | 4.3536              |
| 20     | H         | 1.108825                      | 0.672415  | 1.962832  | 29.5432                    | 2.2981              |
| 21     | H         | 0.705323                      | -1.050125 | 2.159852  | 30.0116                    | 1.8297              |
| 22     | H         | -1.506949                     | -1.415786 | 1.475098  | 29.0268                    | 2.8145              |
| 23     | H         | -1.129296                     | -2.104875 | -0.115042 | 28.6283                    | 3.213               |

## 4-exo-h2

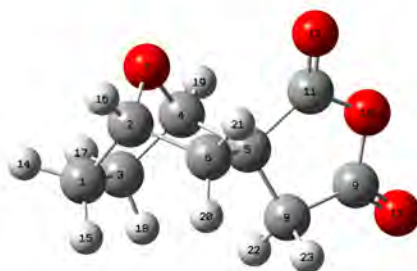

E(RM062X): 649.671386 Hartrees

E(RB3LYP): -650.093515 Hartrees

Sum of electronic and thermal Free Energies: -649.521787 Hartrees

| Atom # | Atom Type | Cartesian Coordinates (x,y,z) |           |           | NMR<br>Shielding<br>Tensor | Scaled<br>NMR Shift |
|--------|-----------|-------------------------------|-----------|-----------|----------------------------|---------------------|
| 1      | C         | -2.740892                     | -0.960149 | 0.261641  | 150.0478                   | 33.9072             |
| 2      | C         | -2.282394                     | 0.494132  | 0.452952  | 100.0332                   | 83.9218             |
| 3      | C         | -1.683146                     | -1.472572 | -0.753246 | 153.9145                   | 30.0405             |
| 4      | C         | -0.827766                     | -0.209522 | -0.960681 | 94.8774                    | 89.0776             |
| 5      | C         | 0.071209                      | 0.059674  | 0.29968   | 122.9469                   | 61.0081             |
| 6      | C         | -1.004186                     | 0.53104   | 1.312725  | 138.8499                   | 45.1051             |
| 7      | O         | -1.783317                     | 0.836898  | -0.850718 |                            |                     |
| 8      | C         | 1.025848                      | -1.068873 | 0.688879  | 142.7081                   | 41.2469             |
| 9      | C         | 2.3418                        | -0.675456 | 0.067856  | 1.2247                     | 182.7303            |
| 10     | O         | 2.290783                      | 0.646998  | -0.307338 |                            |                     |
| 11     | C         | 1.033671                      | 1.174661  | -0.067621 | -3.465                     | 187.42              |
| 12     | O         | 0.837657                      | 2.346603  | -0.188458 |                            |                     |
| 13     | O         | 3.334175                      | -1.32337  | -0.095504 |                            |                     |
| 14     | H         | -3.746536                     | -0.994818 | -0.162672 | 30.064                     | 1.7773              |
| 15     | H         | -2.741571                     | -1.517631 | 1.201381  | 30.3522                    | 1.4891              |
| 16     | H         | -3.056198                     | 1.202648  | 0.746017  | 27.1882                    | 4.6531              |
| 17     | H         | -2.144201                     | -1.745054 | -1.704961 | 30.1054                    | 1.7359              |
| 18     | H         | -1.122287                     | -2.336937 | -0.39586  | 29.8723                    | 1.969               |
| 19     | H         | -0.29951                      | -0.145194 | -1.914262 | 27.3168                    | 4.5245              |
| 20     | H         | -1.061785                     | -0.128805 | 2.181583  | 30.417                     | 1.4243              |
| 21     | H         | -0.792588                     | 1.548563  | 1.649243  | 29.285                     | 2.5563              |
| 22     | H         | 0.743936                      | -2.066139 | 0.34978   | 28.7541                    | 3.0872              |
| 23     | H         | 1.18149                       | -1.111265 | 1.772784  | 28.6496                    | 3.1917              |

**4-endo**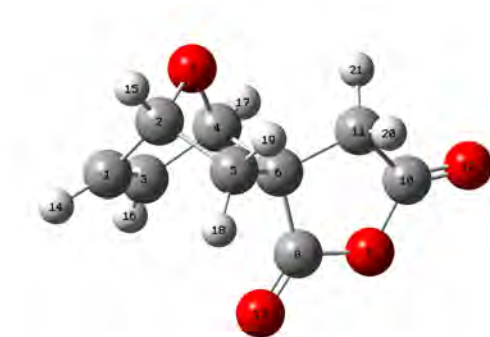

E(RM062X): -648.434846 Hartrees

E(RB3LYP): -648.850016 Hartrees

Sum of electronic and thermal Free Energies: -648.308473 Hartrees

| Atom # | Atom Type | Cartesian Coordinates (x,y,z) |           |           | NMR<br>Shielding<br>Tensor | Scaled<br>NMR Shift |
|--------|-----------|-------------------------------|-----------|-----------|----------------------------|---------------------|
| 1      | 6         | 2.707278                      | 0.563969  | -0.241119 | 34.8859                    | 149.0691            |
| 2      | 6         | 2.296014                      | -0.671319 | 0.538523  | 97.4533                    | 86.5017             |
| 3      | 6         | 1.780827                      | 0.710222  | -1.190253 | 42.5112                    | 141.4438            |
| 4      | 6         | 0.824473                      | -0.450441 | -0.991801 | 90.5377                    | 93.4173             |
| 5      | 6         | 1.057664                      | -0.270389 | 1.400016  | 139.2685                   | 44.6865             |
| 6      | 6         | -0.040046                     | -0.173285 | 0.315036  | 126.5175                   | 57.4375             |
| 7      | 8         | 1.672761                      | -1.469692 | -0.478717 |                            |                     |
| 8      | 6         | -0.760812                     | 1.152716  | 0.232914  | -2.3157                    | 186.2707            |
| 9      | 8         | -2.081602                     | 0.940126  | -0.112762 |                            |                     |
| 10     | 6         | -2.385241                     | -0.40618  | -0.092871 | 1.0745                     | 182.8805            |
| 11     | 6         | -1.192848                     | -1.17403  | 0.415029  | 136.8637                   | 47.0913             |
| 12     | 8         | -3.468372                     | -0.792056 | -0.420863 |                            |                     |
| 13     | 8         | -0.34419                      | 2.262786  | 0.387935  |                            |                     |
| 14     | 1         | 3.519177                      | 1.230398  | 0.023019  | 24.8346                    | 7.0067              |
| 15     | 1         | 3.069193                      | -1.234474 | 1.057149  | 26.7055                    | 5.1358              |
| 16     | 1         | 1.647084                      | 1.520057  | -1.896066 | 25.2459                    | 6.5954              |
| 17     | 1         | 0.242454                      | -0.798726 | -1.845599 | 27.0455                    | 4.7958              |
| 18     | 1         | 1.208325                      | 0.668555  | 1.936127  | 29.7685                    | 2.0728              |
| 19     | 1         | 0.814606                      | -1.060719 | 2.113447  | 29.8491                    | 1.9922              |
| 20     | 1         | -1.407665                     | -1.450802 | 1.453451  | 28.6368                    | 3.2045              |
| 21     | 1         | -1.045795                     | -2.091173 | -0.159112 | 28.6605                    | 3.1808              |



## 4-exo

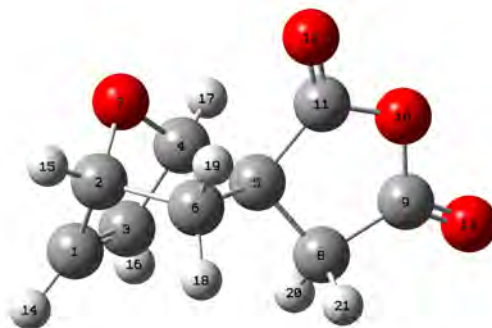

E(RM062X): -648.433916 Hartrees

E(RB3LYP): -648.849128 Hartrees

Sum of electronic and thermal Free Energies: -648.307705 Hartrees

| Atom # | Atom Type | Cartesian Coordinates (x,y,z) |           |           | NMR<br>Shielding<br>Tensor | Scaled<br>NMR Shift |
|--------|-----------|-------------------------------|-----------|-----------|----------------------------|---------------------|
| 1      | 6         | -2.600366                     | -1.128773 | 0.162313  | 32.422                     | 151.533             |
| 2      | 6         | -2.371526                     | 0.350631  | 0.417782  | 97.7384                    | 86.2166             |
| 3      | 6         | -1.666612                     | -1.486829 | -0.722624 | 40.8516                    | 143.1034            |
| 4      | 6         | -0.883078                     | -0.214115 | -1.001867 | 93.2151                    | 90.7399             |
| 5      | 6         | 0.006087                      | 0.053768  | 0.293548  | 125.8963                   | 58.0587             |
| 6      | 6         | -1.092022                     | 0.468493  | 1.301106  | 140.2623                   | 43.6927             |
| 7      | 8         | -1.866855                     | 0.795037  | -0.848027 |                            |                     |
| 8      | 6         | 0.961136                      | -1.083101 | 0.652095  | 140.6804                   | 43.2746             |
| 9      | 6         | 2.281921                      | -0.656353 | 0.06487   | 1.178                      | 182.777             |
| 10     | 8         | 2.2229                        | 0.679349  | -0.264361 |                            |                     |
| 11     | 6         | 0.955937                      | 1.187539  | -0.036351 | -3.6896                    | 187.6446            |
| 12     | 8         | 0.745402                      | 2.358362  | -0.145855 |                            |                     |
| 13     | 8         | 3.28305                       | -1.287578 | -0.108734 |                            |                     |
| 14     | 1         | -3.318672                     | -1.75189  | 0.681323  | 24.7573                    | 7.084               |
| 15     | 1         | -3.220126                     | 0.953793  | 0.733862  | 26.6649                    | 5.1764              |
| 16     | 1         | -1.435439                     | -2.470091 | -1.11266  | 25.0033                    | 6.838               |
| 17     | 1         | -0.355855                     | -0.125096 | -1.952165 | 26.833                     | 5.0083              |
| 18     | 1         | -1.11907                      | -0.182558 | 2.176714  | 30.4518                    | 1.3895              |
| 19     | 1         | -0.954594                     | 1.504005  | 1.619739  | 29.0656                    | 2.7757              |
| 20     | 1         | 0.677608                      | -2.064954 | 0.268583  | 29.163                     | 2.6783              |
| 21     | 1         | 1.101308                      | -1.172143 | 1.735183  | 28.8425                    | 2.9988              |

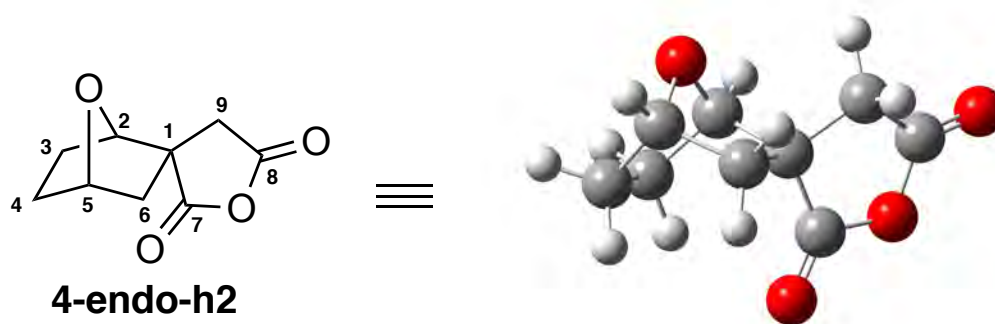**4-endo-h2****Table S2-H.** Error correction for computed **4-endo-h2**  $^1\text{H}$  chemical shifts.

| Atom      | Computed Shift | Experimental Shift | Error | Scaled (Linearly Corrected) Shift | Scaled Error |
|-----------|----------------|--------------------|-------|-----------------------------------|--------------|
| 2         | 4.35           | 4.43               | 0.08  | 4.41                              | 0.02         |
| 3-Endo    | 1.99           | 2.14               | 0.15  | 2.04                              | 0.10         |
| 3-Exo     | 1.58           | 1.65               | 0.07  | 1.63                              | 0.02         |
| 4-Endo    | 1.66           | 1.73               | 0.07  | 1.71                              | 0.02         |
| 4-Exo     | 1.76           | 1.82               | 0.06  | 1.81                              | 0.01         |
| 5         | 4.64           | 4.76               | 0.12  | 4.70                              | 0.06         |
| 6-Endo    | 2.30           | 2.26               | -0.04 | 2.35                              | -0.09        |
| 6-Exo     | 1.83           | 1.92               | 0.09  | 1.88                              | 0.04         |
| 9 (pro-R) | 3.21           | 3.22               | 0.01  | 3.27                              | -0.05        |
| 9 (pro-S) | 2.81           | 2.76               | -0.05 | 2.87                              | -0.11        |

**Table S2-C.** Error correction for computed **4-endo-h2**  $^{13}\text{C}$  chemical shifts.

| Atom | Computed Shift | Experimental Shift | Error | Scaled (Linearly Corrected) Shift | Scaled Error |
|------|----------------|--------------------|-------|-----------------------------------|--------------|
| 1    | 62.5           | 54.6               | -7.9  | 61.3                              | -6.7         |
| 2    | 91.8           | 84.9               | -6.9  | 89.4                              | -4.5         |
| 3    | 29.0           | 24.6               | -4.4  | 30.2                              | -5.6         |
| 4    | 32.9           | 29.2               | -3.7  | 34.1                              | -4.9         |
| 5    | 84.7           | 78.2               | -6.5  | 84.2                              | -6.0         |
| 6    | 48.5           | 44.5               | -4.0  | 45.3                              | -0.8         |
| 7    | 187.0          | 173.6              | -13.4 | 188.1                             | -14.5        |
| 8    | 182.5          | 168.7              | -13.8 | 183.4                             | -14.7        |
| 9    | 49.2           | 44.2               | -5.0  | 41.4                              | 2.8          |

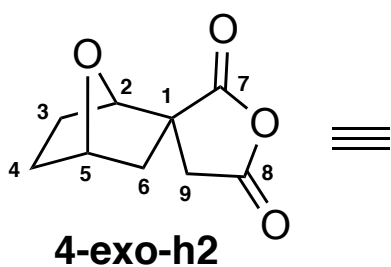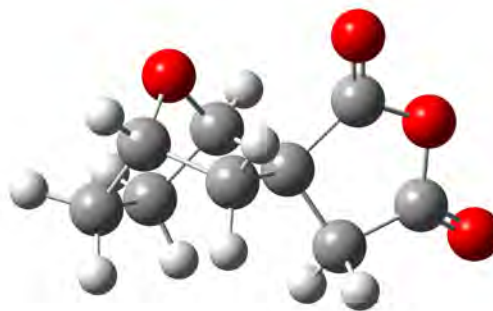

**Table S3-H.** Error correction for computed **4-exo-h2**  $^1\text{H}$  chemical shifts.

| Atom      | Computed Shift | Experimental Shift | Error   | Scaled (Linearly Corrected) Shift | Scaled Error |
|-----------|----------------|--------------------|---------|-----------------------------------|--------------|
| 2         | 4.52           | 4.73               | 0.2055  | 4.57                              | 0.16         |
| 3-Endo    | 1.97           | 1.80               | -0.17   | 2.02                              | -0.22        |
| 3-Exo     | 1.74           | 1.57               | -0.17   | 1.79                              | -0.22        |
| 4-Endo    | 1.42           | 1.86               | 0.4357  | 1.48                              | 0.38         |
| 4-Exo     | 1.78           | 1.88               | 0.1027  | 1.83                              | 0.05         |
| 5         | 4.65           | 4.79               | 0.1369  | 4.70                              | 0.09         |
| 6-Endo    | 1.42           | 1.63               | 0.2057  | 1.48                              | 0.15         |
| 6-Exo     | 2.56           | 2.50               | -0.0563 | 2.61                              | -0.11        |
| 9 (pro-S) | 3.19           | 3.09               | -0.1    | 3.24                              | -0.15        |
| 9 (pro-R) | 3.09           | 3.02               | -0.0672 | 3.14                              | -0.12        |

**Table S3-C.** Error correction for computed **4-exo-h2**  $^{13}\text{C}$  chemical shifts.

| Atom | Computed Shift | Experimental Shift | Error | Scaled (Linearly Corrected) Shift | Scaled Error |
|------|----------------|--------------------|-------|-----------------------------------|--------------|
| 1    | 61.0           | 52.7               | -8.3  | 54.6                              | -1.9         |
| 2    | 89.1           | 81.2               | -7.9  | 84.8                              | -3.6         |
| 3    | 30.0           | 26.5               | -3.5  | 24.6                              | 1.9          |
| 4    | 33.9           | 29.4               | -4.5  | 29.2                              | 0.2          |
| 5    | 83.9           | 77.4               | -6.5  | 78.1                              | -0.7         |
| 6    | 45.1           | 44.1               | -1.0  | 44.5                              | -0.4         |
| 7    | 187.4          | 174.7              | -12.7 | 173.4                             | 1.3          |
| 8    | 182.7          | 169.0              | -13.7 | 168.5                             | 0.5          |
| 9    | 41.2           | 37.5               | -3.7  | 44.2                              | -0.1         |

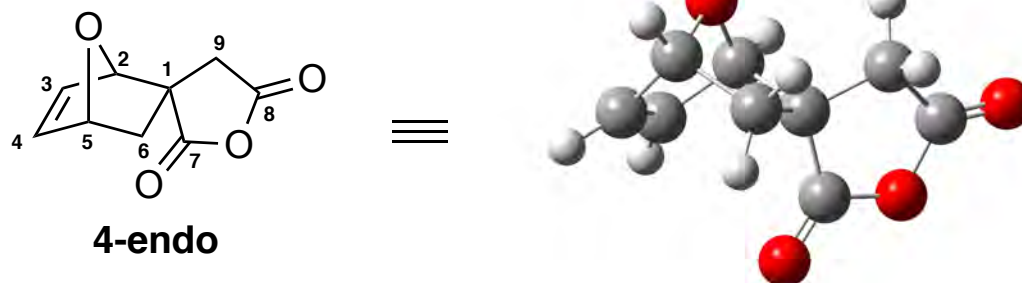**Table S4-H.** Error correction for computed **4-endo**  $^1\text{H}$  chemical shifts.

| Atom      | Computed Shift | Experimental Shift | Error | Scaled (Linearly Corrected) Shift | Scaled Error |
|-----------|----------------|--------------------|-------|-----------------------------------|--------------|
| 2         | 4.80           | 4.83               | 0.03  | 4.70                              | 0.13         |
| 3         | 6.60           | 6.36               | -0.24 | 6.40                              | -0.04        |
| 4         | 7.01           | 6.66               | -0.35 | 6.79                              | -0.13        |
| 5         | 5.14           | 5.2                | 0.06  | 5.02                              | 0.18         |
| 6-endo    | 2.07           | 2.07               | 0.00  | 2.13                              | -0.06        |
| 6-exo     | 1.99           | 2.05               | 0.06  | 2.05                              | 0.00         |
| 9 (pro-S) | 3.18           | 3.08               | -0.10 | 3.17                              | -0.09        |
| 9 (pro-R) | 3.20           | 3.2                | 0.00  | 3.20                              | 0.00         |

**Table S4-C.** Error correction for computed **4-exo-h2**  $^{13}\text{C}$  chemical shifts.

| Atom | Computed Shift | Experimental Shift | Error | Scaled (Linearly Corrected) Shift | Scaled Error |
|------|----------------|--------------------|-------|-----------------------------------|--------------|
| 1    | 57.4           | 49.8               | -7.6  | 52.2                              | -2.4         |
| 2    | 93.4           | 86.4               | -7.0  | 86.0                              | 0.4          |
| 3    | 141.4          | 130.5              | -10.9 | 131.0                             | -0.5         |
| 4    | 149.1          | 138.5              | -10.6 | 138.2                             | 0.3          |
| 5    | 86.5           | 80.0               | -6.5  | 79.5                              | 0.5          |
| 6    | 44.7           | 41.7               | -3.0  | 40.3                              | 1.4          |
| 7    | 186.3          | 173.5              | -12.8 | 173.1                             | 0.4          |
| 8    | 182.9          | 169.5              | -13.4 | 169.9                             | -0.4         |
| 9    | 47.1           | 42.7               | -4.4  | 42.5                              | 0.2          |

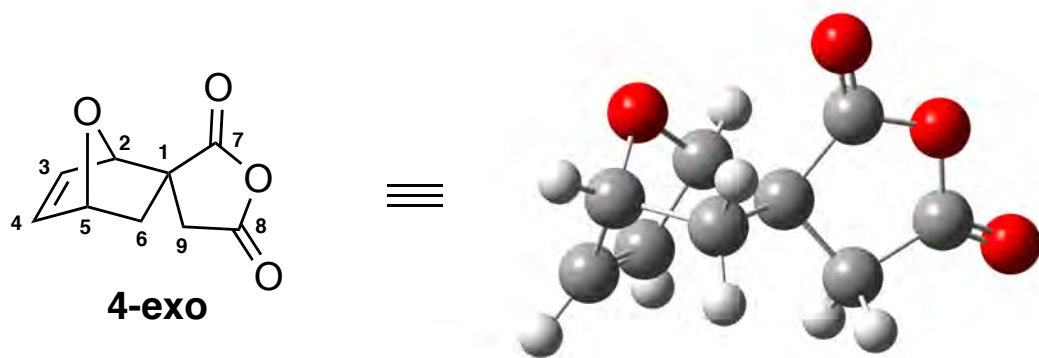**Table S5-H.** Error correction for computed **4-exo**  $^1\text{H}$  chemical shifts.

| Atom      | Computed Shift | Experimental Shift | Error | Scaled (Linearly Corrected) Shift | Scaled Error |
|-----------|----------------|--------------------|-------|-----------------------------------|--------------|
| 2         | 5.01           | 5.11               | 0.10  | 4.88                              | 0.23         |
| 3         | 6.84           | 6.48               | -0.36 | 6.59                              | -0.11        |
| 4         | 7.08           | 6.71               | -0.37 | 6.82                              | -0.11        |
| 5         | 5.18           | 5.26               | 0.08  | 5.04                              | 0.22         |
| 6-endo    | 1.39           | 1.53               | 0.14  | 1.50                              | 0.03         |
| 6-exo     | 2.78           | 2.71               | -0.07 | 2.79                              | -0.08        |
| 9 (pro-S) | 3.00           | 2.77               | -0.23 | 3.00                              | -0.23        |
| 9 (pro-R) | 2.68           | 2.76               | 0.08  | 2.70                              | 0.06         |

**Table S5-C.** Error correction for computed **4-exo-h2**  $^{13}\text{C}$  chemical shifts.

| Atom | Computed Shift | Experimental Shift | Error | Scaled (Linearly Corrected) Shift | Scaled Error |
|------|----------------|--------------------|-------|-----------------------------------|--------------|
| 1    | 58.0587        | 49.70              | -8.4  | 52.8                              | -3.1         |
| 2    | 90.7399        | 83.00              | -7.7  | 82.8                              | 0.2          |
| 3    | 143.1034       | 133.20             | -9.9  | 130.8                             | 2.4          |
| 4    | 151.533        | 140.60             | -10.9 | 138.5                             | 2.1          |
| 5    | 86.2166        | 79.60              | -6.6  | 78.6                              | 1.0          |
| 6    | 43.6927        | 38.50              | -5.2  | 39.7                              | -1.2         |
| 7    | 187.6446       | 175.10             | -12.5 | 171.6                             | 3.5          |
| 8    | 182.777        | 160.00             | -22.8 | 167.1                             | -7.1         |
| 9    | 43.2746        | 41.40              | -1.9  | 39.3                              | 2.1          |

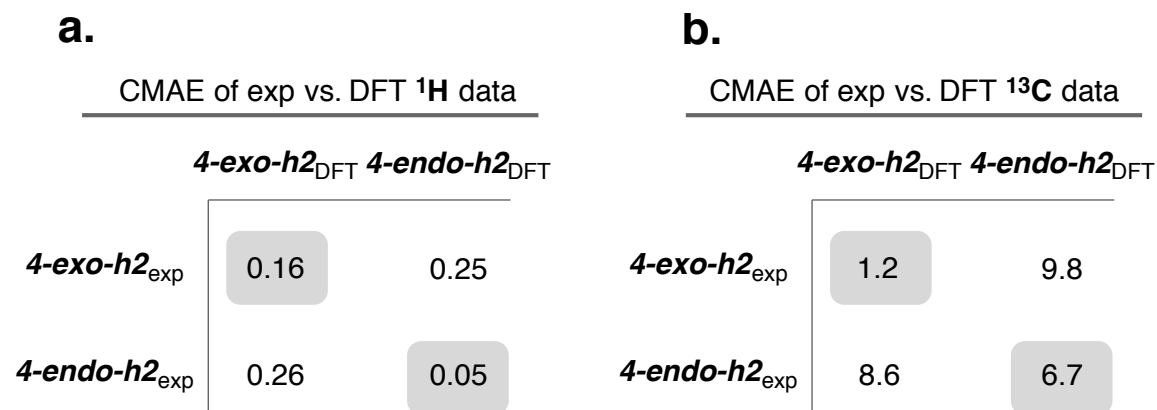

**Figure S10.** CMAEs for  $^1\text{H}$  (a) and  $^{13}\text{C}$  (b) computed chemical shifts between matched and unmatched  $4\text{-exo-h2}$  and  $4\text{-endo-h2}$ .

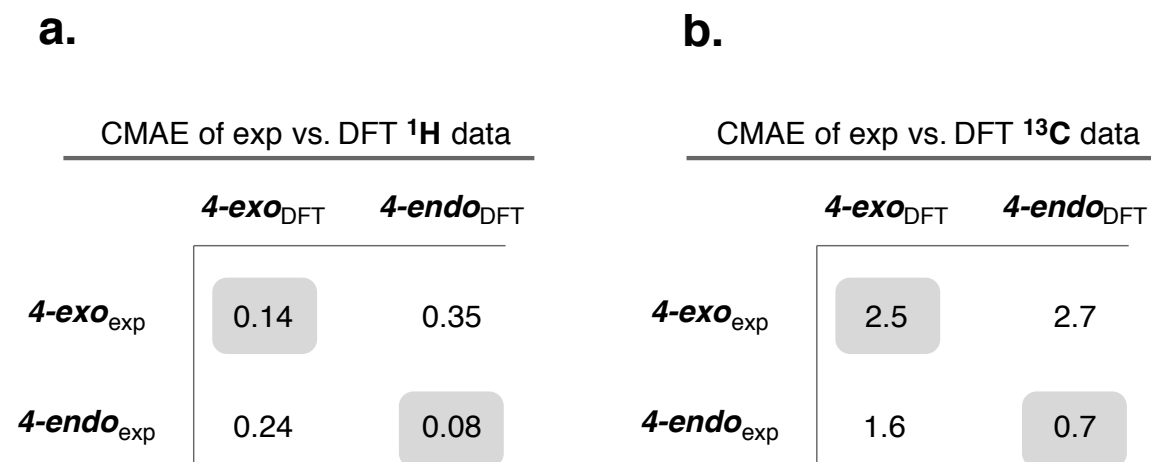

**Figure S11.** CMAEs for  $^1\text{H}$  (a) and  $^{13}\text{C}$  (b) computed chemical shifts between matched and unmatched  $4\text{-exo}$  and  $4\text{-endo}$ .

## VI. References for the Supporting Information

---

- <sup>1</sup> (a) A practical guide to first-order multiplet analysis in  $^1\text{H}$  NMR spectroscopy. Hoye, T. R.; Hanson, P. R.; Vyvyan, J. R. *J. Org. Chem.* **1994**, *59*, 4096–4103. (b) A method for easily determining coupling constant ( $J$ ) values: An addendum to "A practical guide to first-order multiplet analysis in  $^1\text{H}$  NMR spectroscopy." Hoye, T. R.; Zhao, H. *J. Org. Chem.* **2002**, *67*, 4014–4016.
- <sup>2</sup> Boudevska, H.; Bozhkova, N.; Panamsky, I. *Angew. Makromol. Chem.* **1973**, *28*, 121-127.
- <sup>3</sup> Y. Zhao, D. G. Truhlar, *Theor. Chem. Acc.* **2008**, *120*, 215–241.
- <sup>4</sup> M. J. Frisch, G. W. Trucks, H. B. Schlegel, G. E. Scuseria, M. A. Robb, J. R. Cheeseman, G. Scalmani, V. Barone, B. Mennucci, G. A. Petersson, H. Nakatsuji, M. Caricato, X. Li, H. P. Hratchian, A. F. Izmaylov, J. Bloino, G. Zheng, J. L. Sonnenberg, M. Hada, M. Ehara, K. Toyota, R. Fukuda, J. Hasegawa, M. Ishida, T. Nakajima, Y. Honda, O. Kitao, H. Nakai, T. Vreven, J. A. Montgomery, Jr., J. E. Peralta, F. Ogliaro, M. Bearpark, J. J. Heyd, E. Brothers, K. N. Kudin, V. N. Staroverov, T. Keith, R. Kobayashi, J. Normand, K. Raghavachari, A. Rendell, J. C. Burant, S. S. Iyengar, J. Tomasi, M. Cossi, N. Rega, J. M. Millam, M. Klene, J. E. Knox, J. B. Cross, V. Bakken, C. Adamo, J. Jaramillo, R. Gomperts, R. E. Stratmann, O. Yazyev, A. J. Austin, R. Cammi, C. Pomelli, J. W. Ochterski, R. L. Martin, K. Morokuma, V. G. Zakrzewski, G. A. Voth, P. Salvador, J. J. Dannenberg, S. Dapprich, A. D. Daniels, O. Farkas, J. B. Foresman, J. V. Ortiz, J. Cioslowski, and D. J. Fox, *Gaussian 09*, Revision A.02, Gaussian, Inc., Wallingford CT, **2009**.
- <sup>5</sup> A. V. Marenich, C. J. Cramer, D. G. Truhlar, *J. Phys. Chem. B* **2009**, *113*, 6378-6396.

## VII. Copies of $^1\text{H}$ and $^{13}\text{C}$ NMR spectra for all new compounds

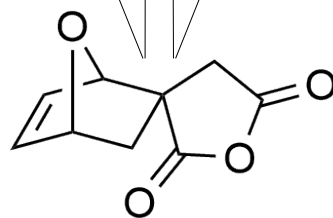

$C_6D_6$ , 500 MHz  
**4-endo**

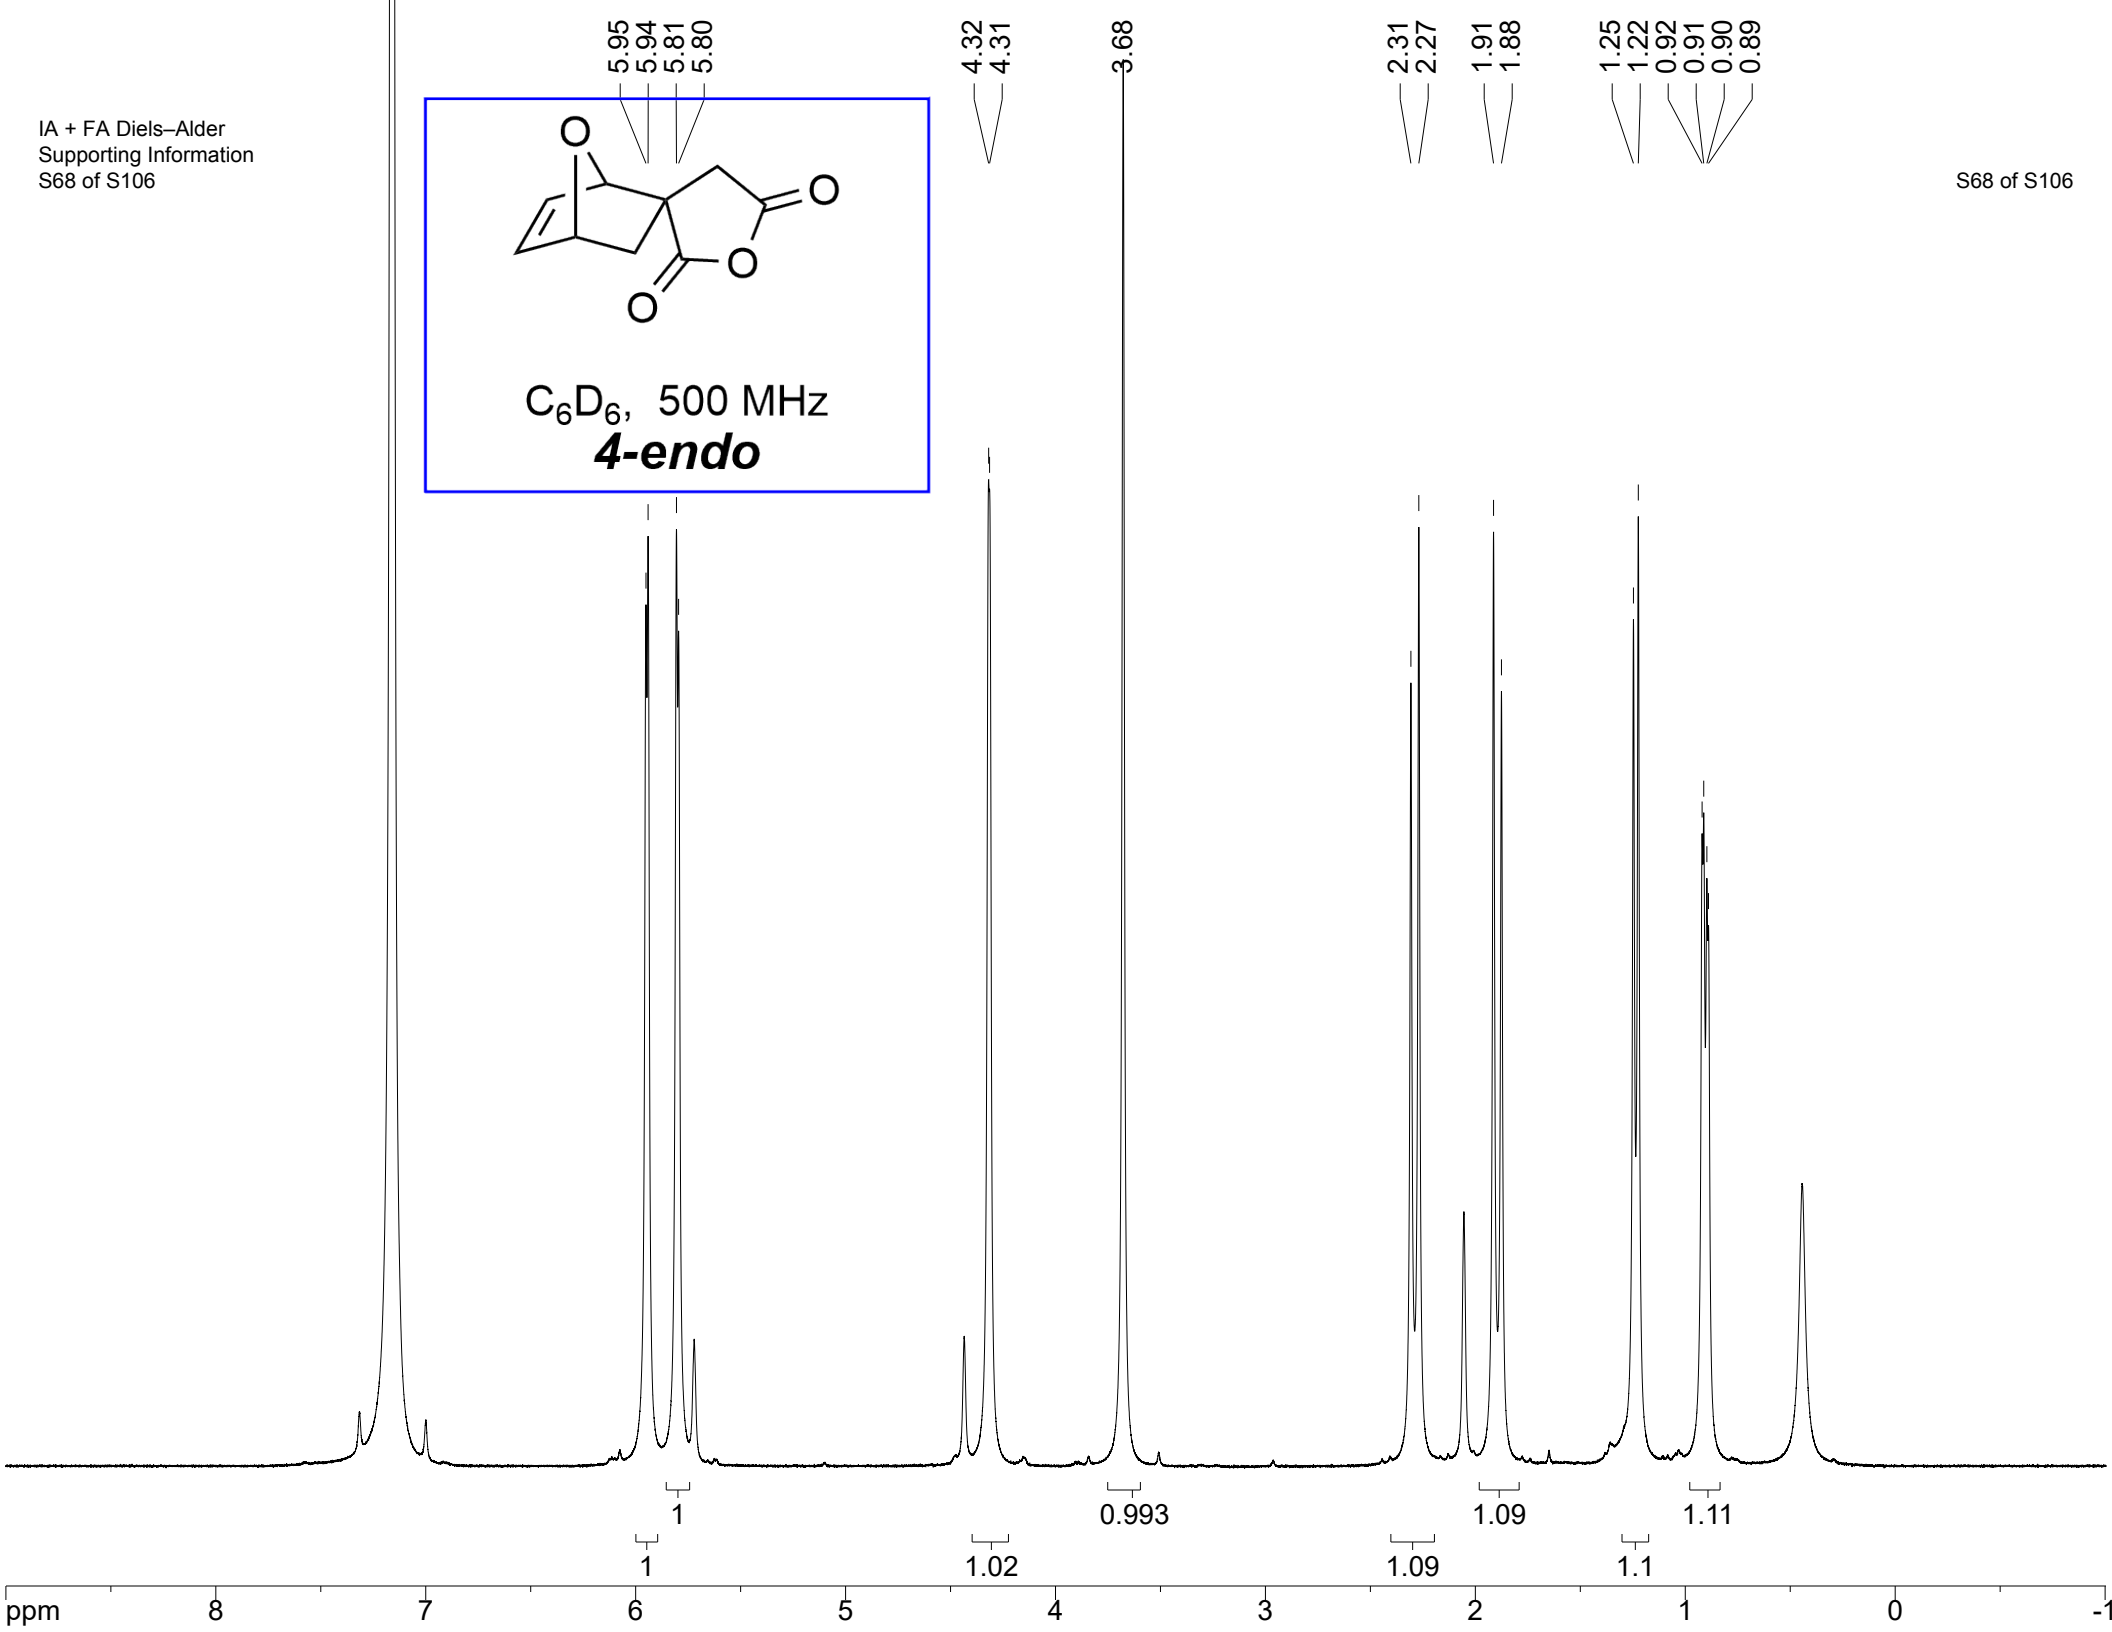



6.67  
6.67  
6.66  
6.66  
6.37  
6.37  
6.36  
6.36  
5.21  
5.21  
5.21  
5.21  
5.20  
5.20  
4.84  
4.84

3.23  
3.19  
3.11  
3.07

2.07  
2.06  
2.06  
2.06

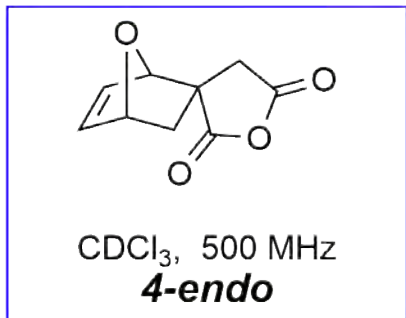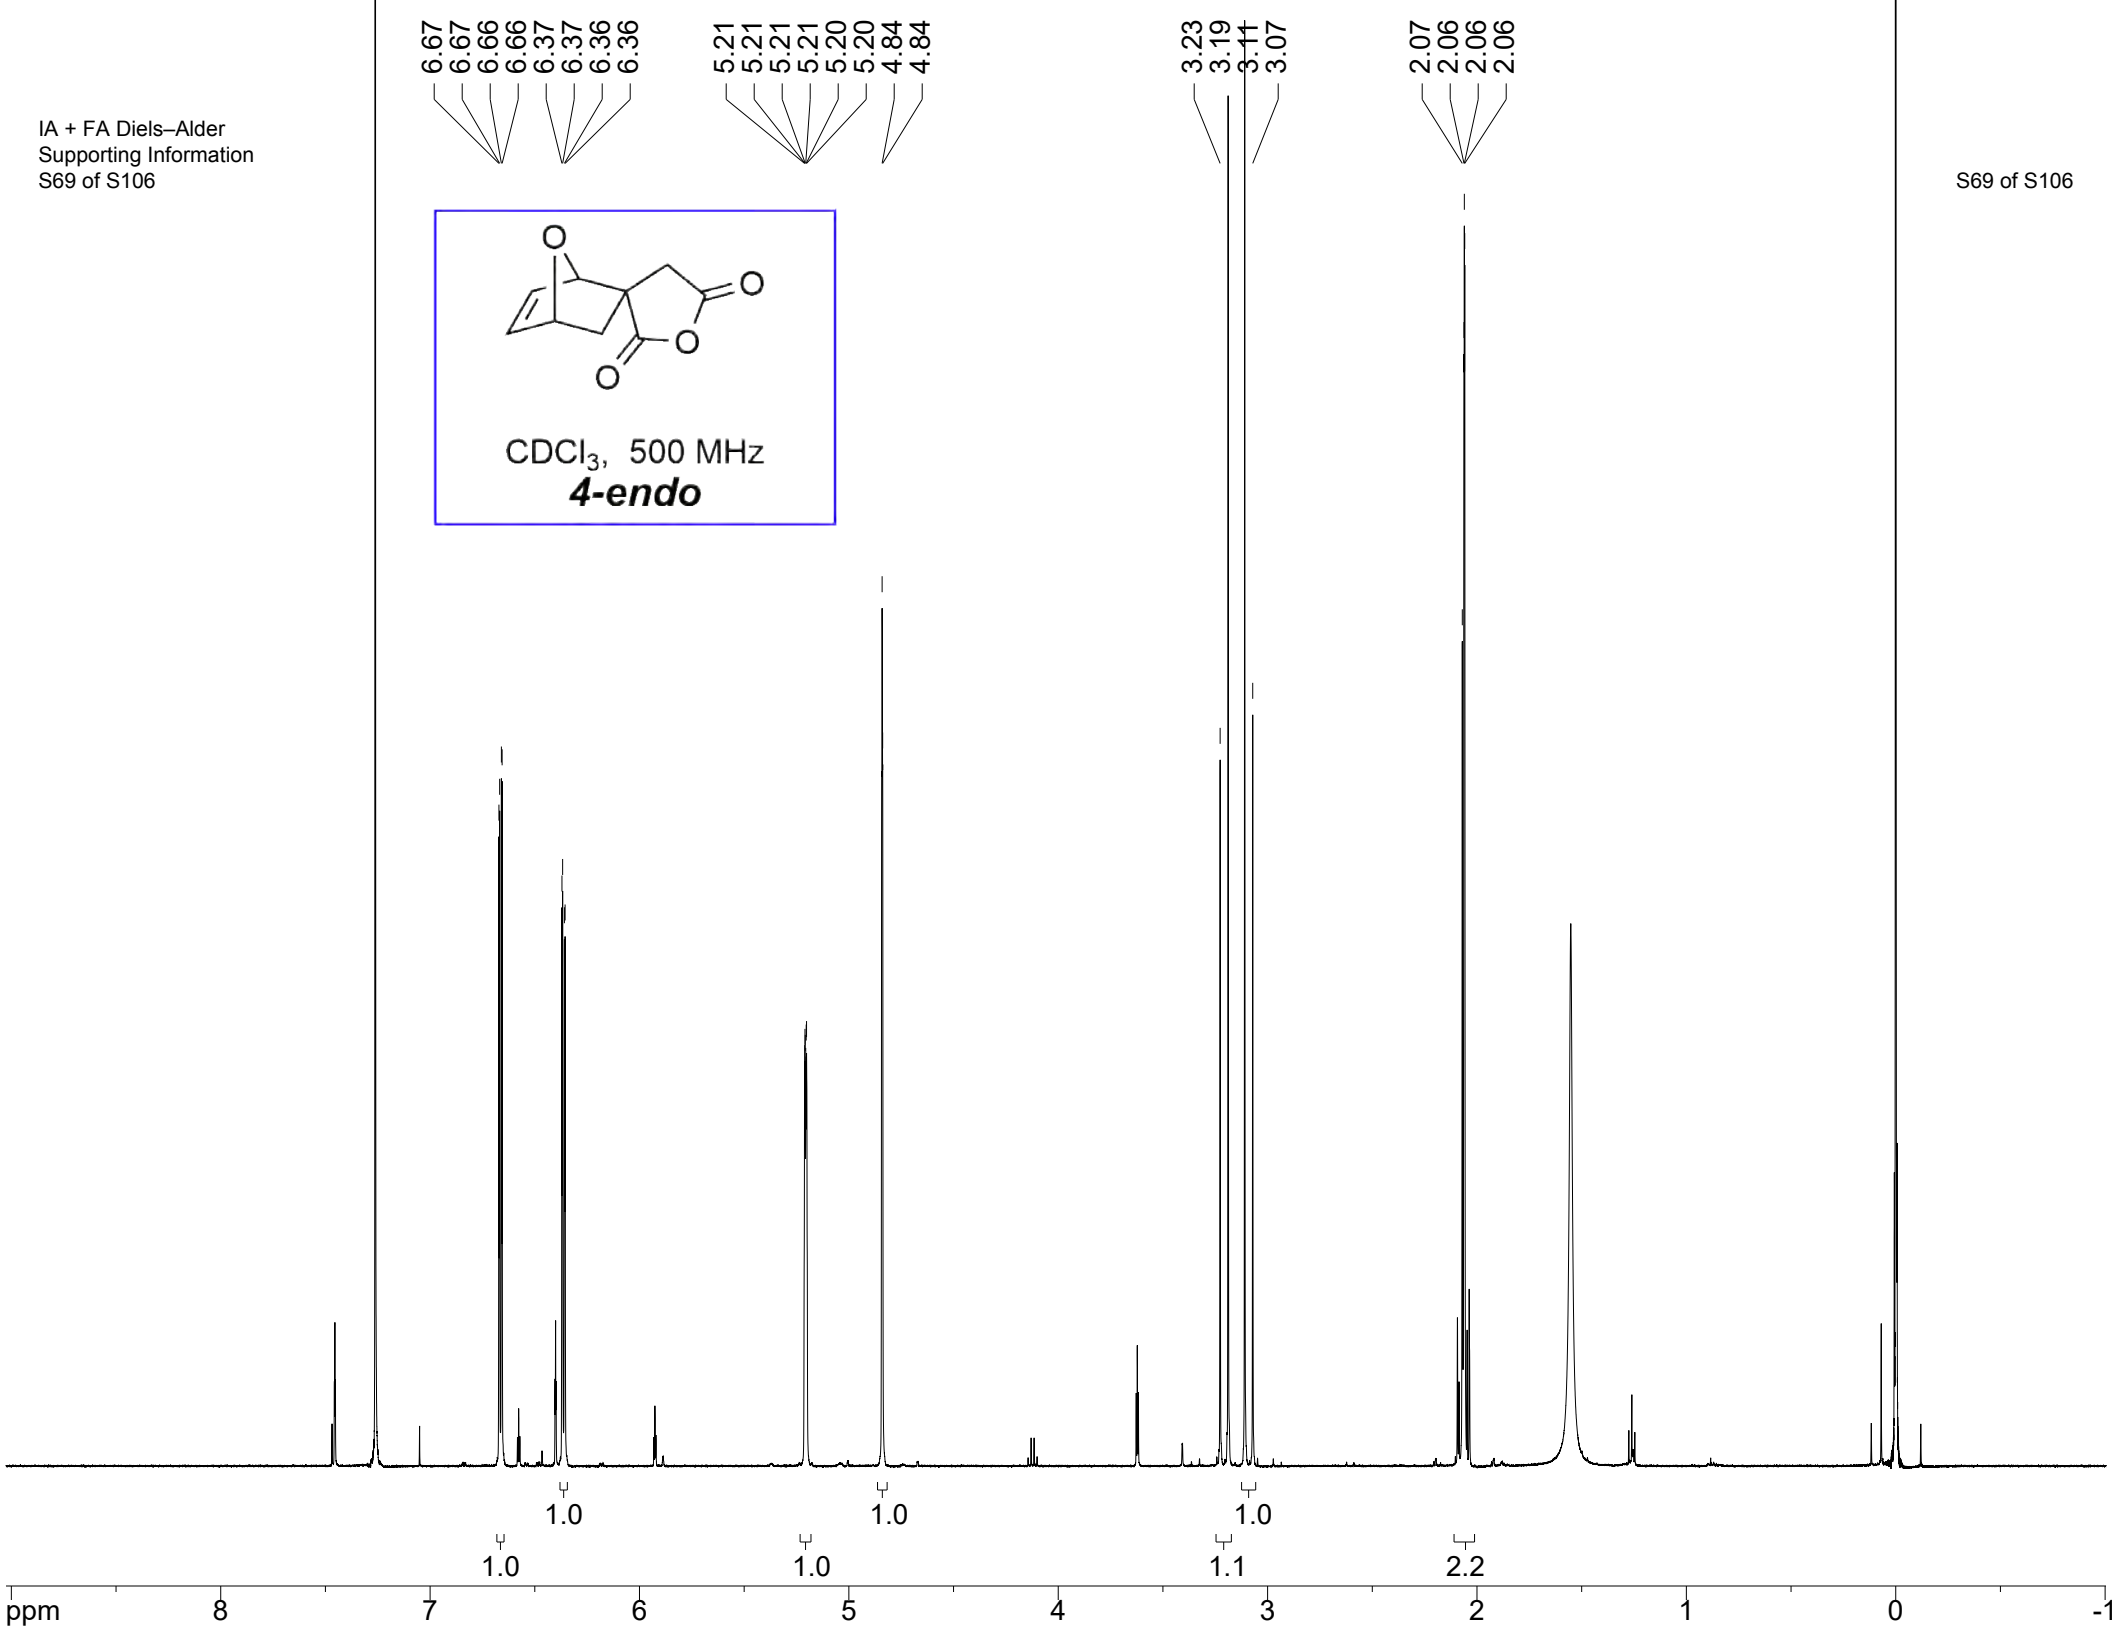

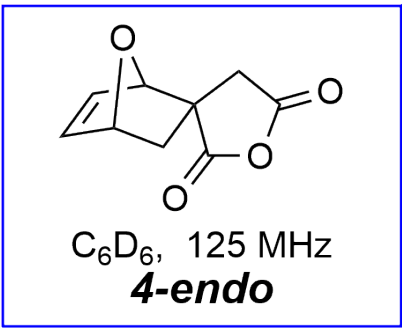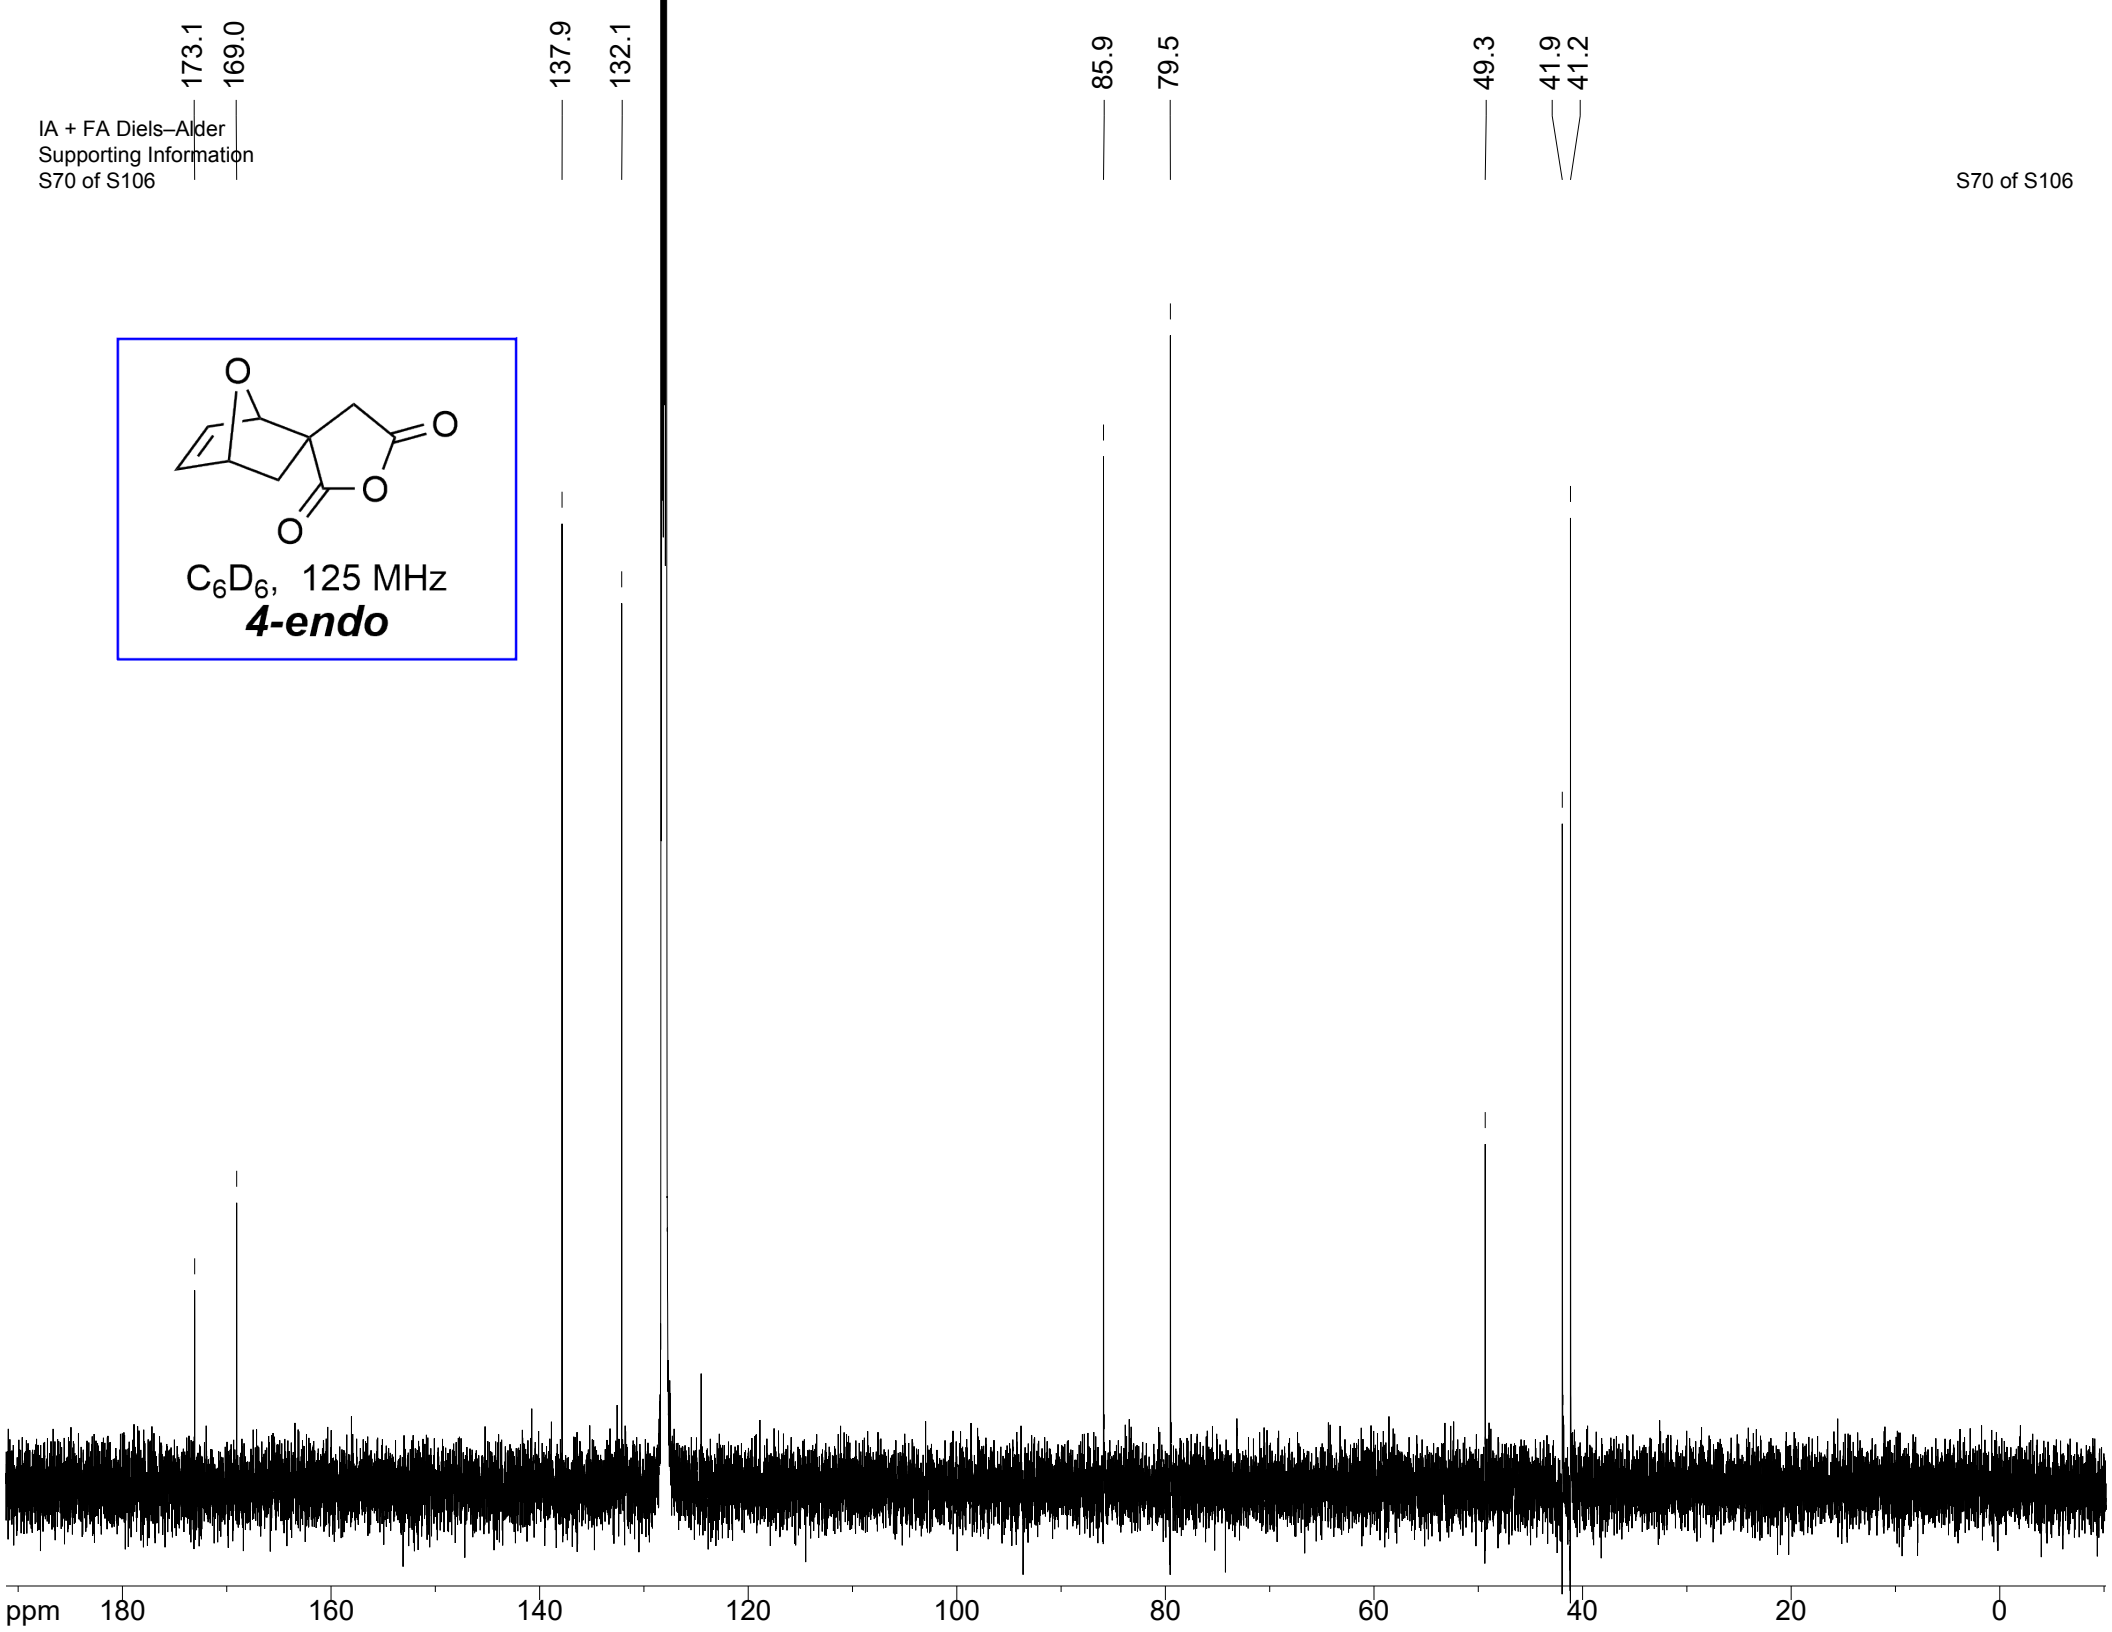

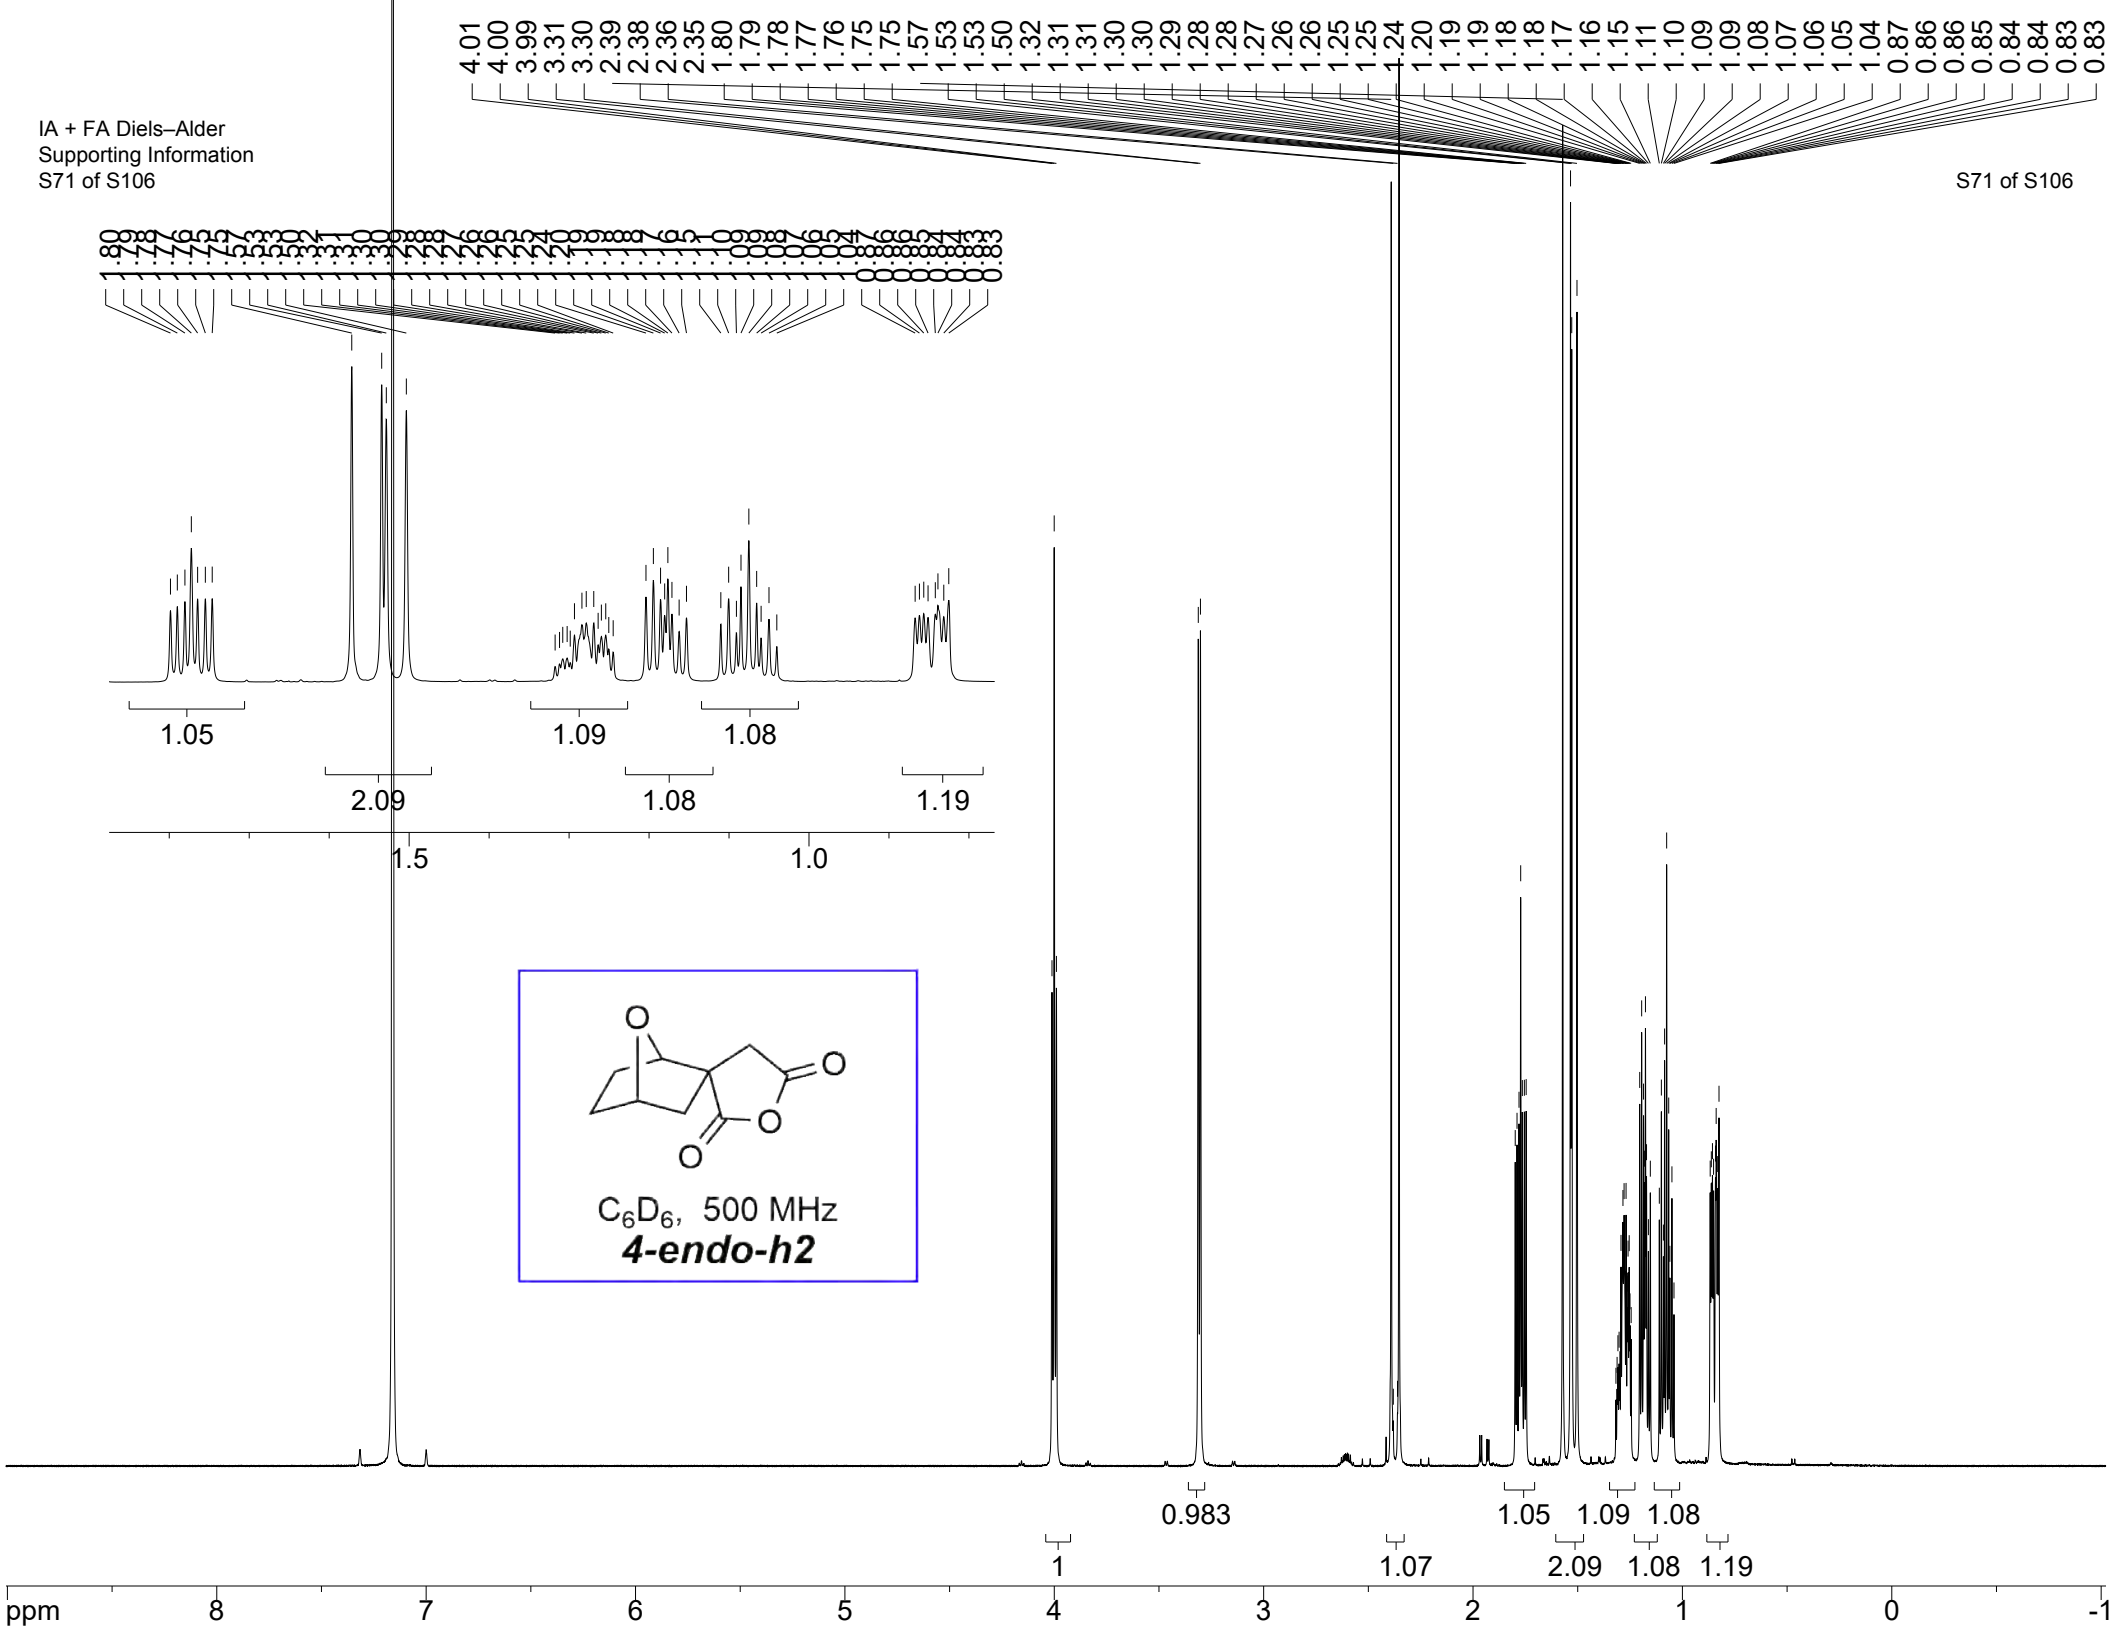

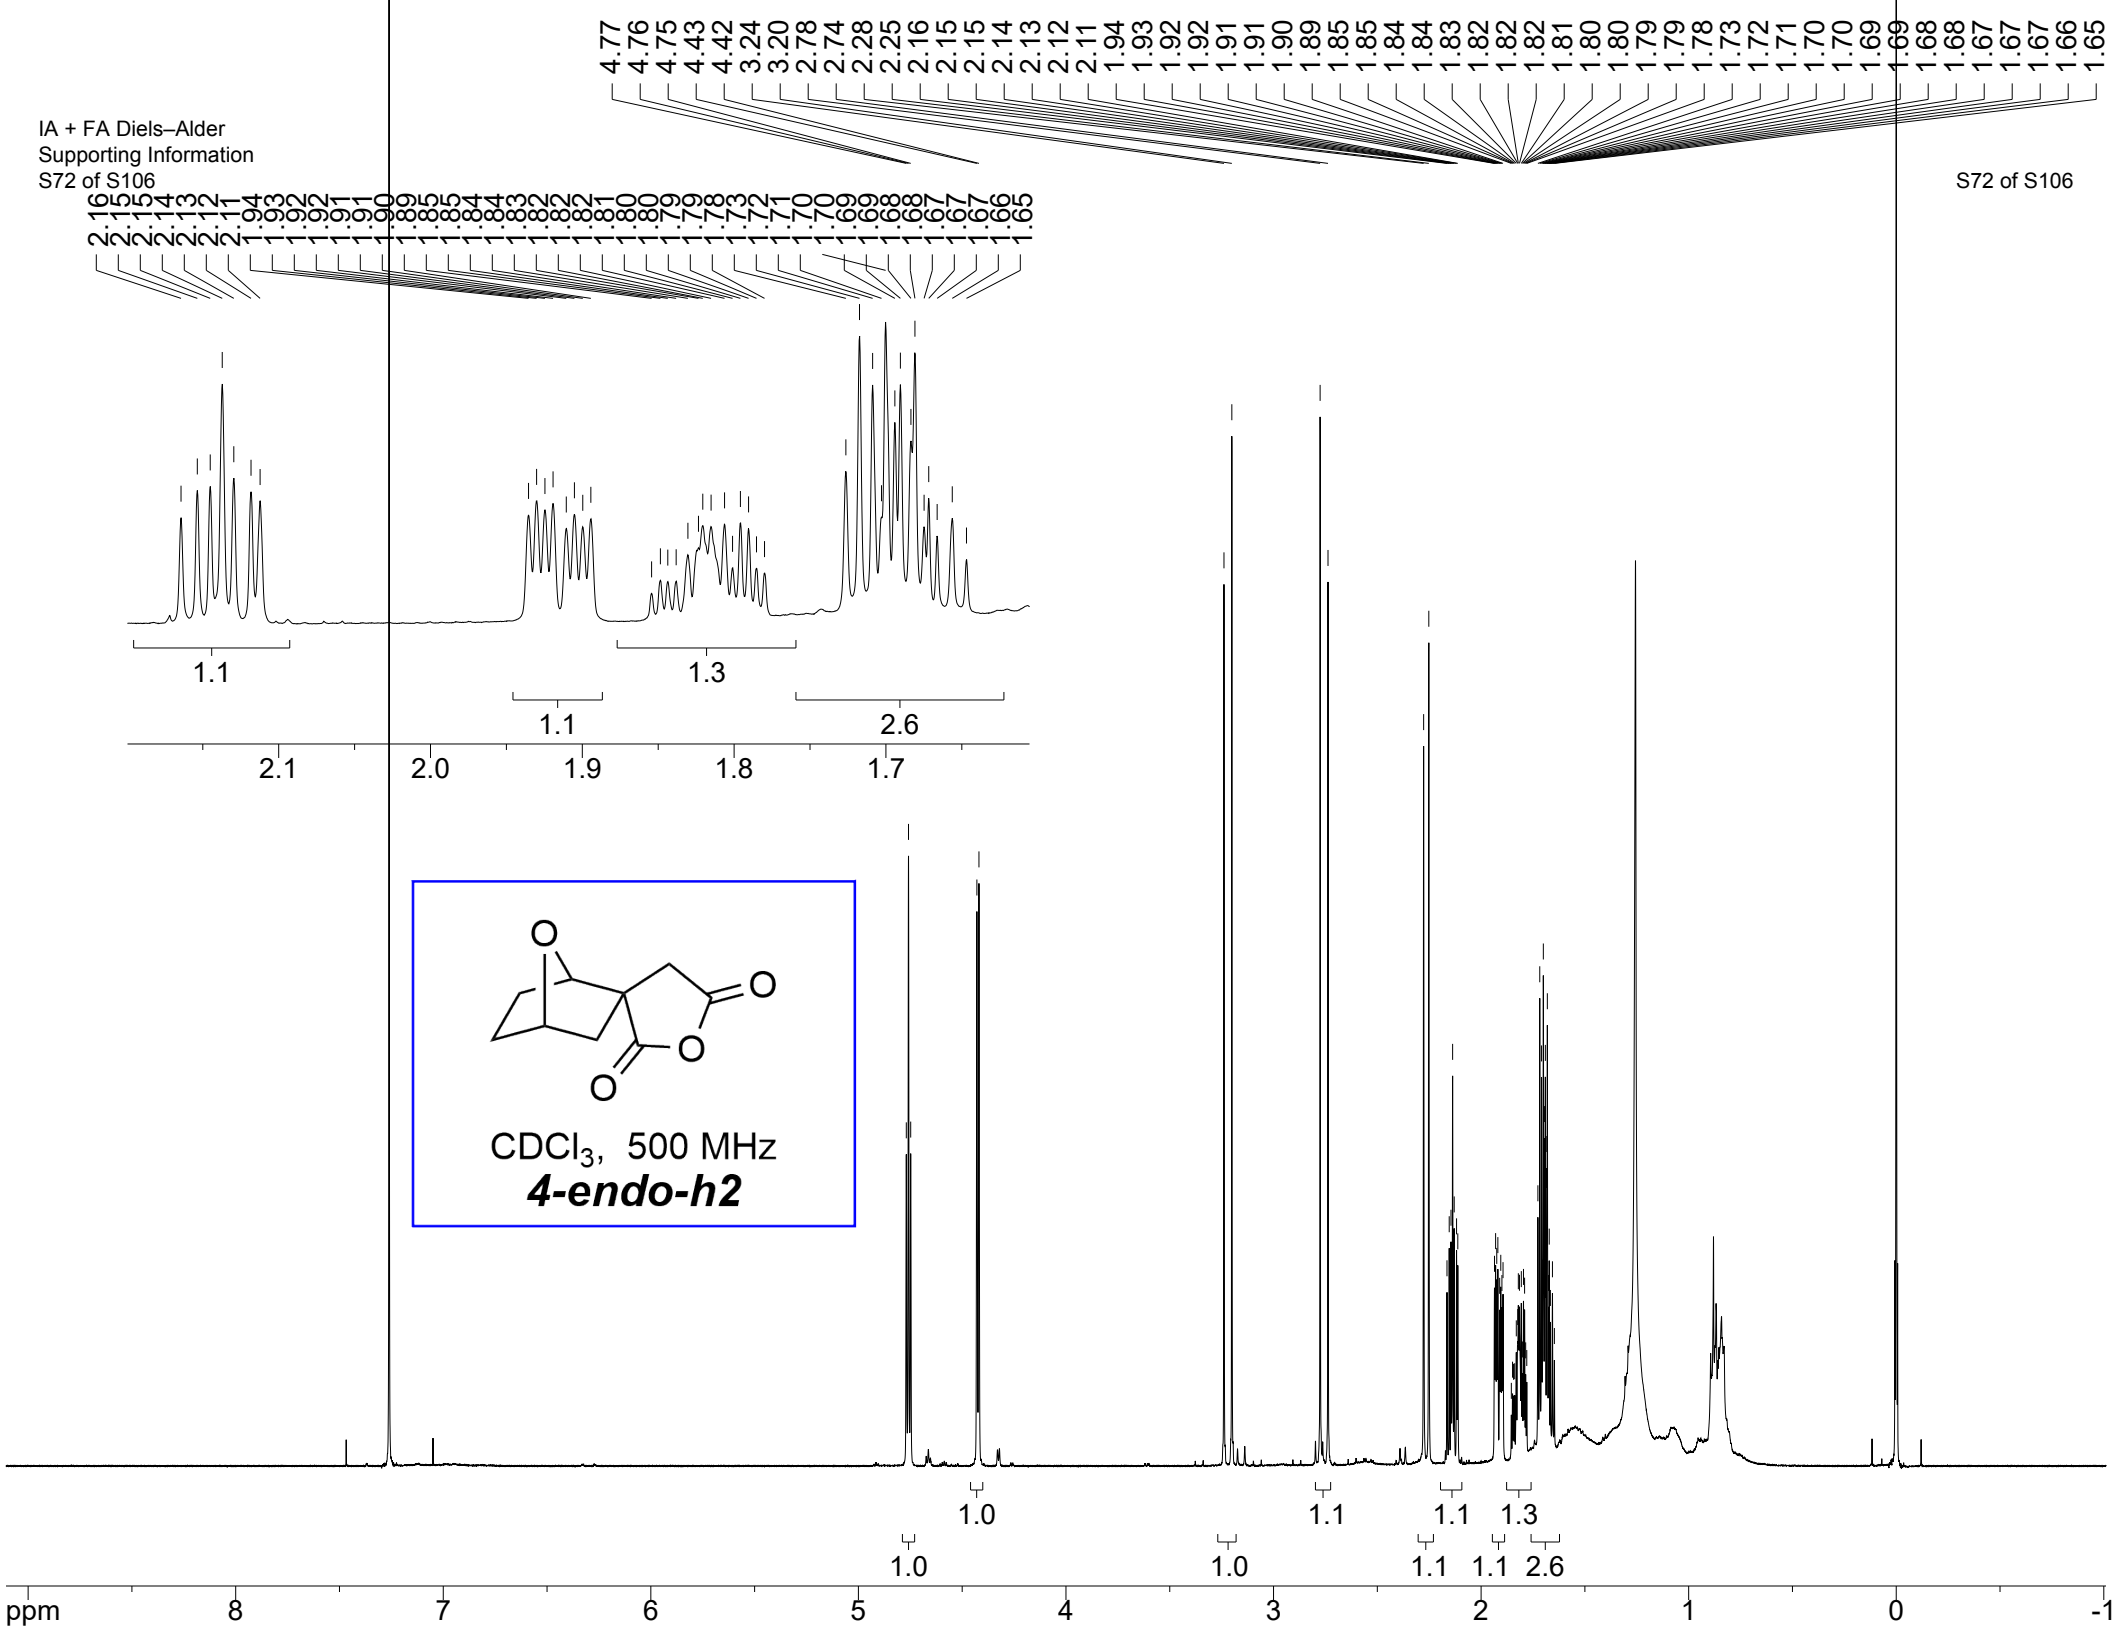

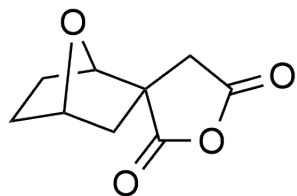

$C_6D_6$ , 125 MHz  
**4-endo-h2**

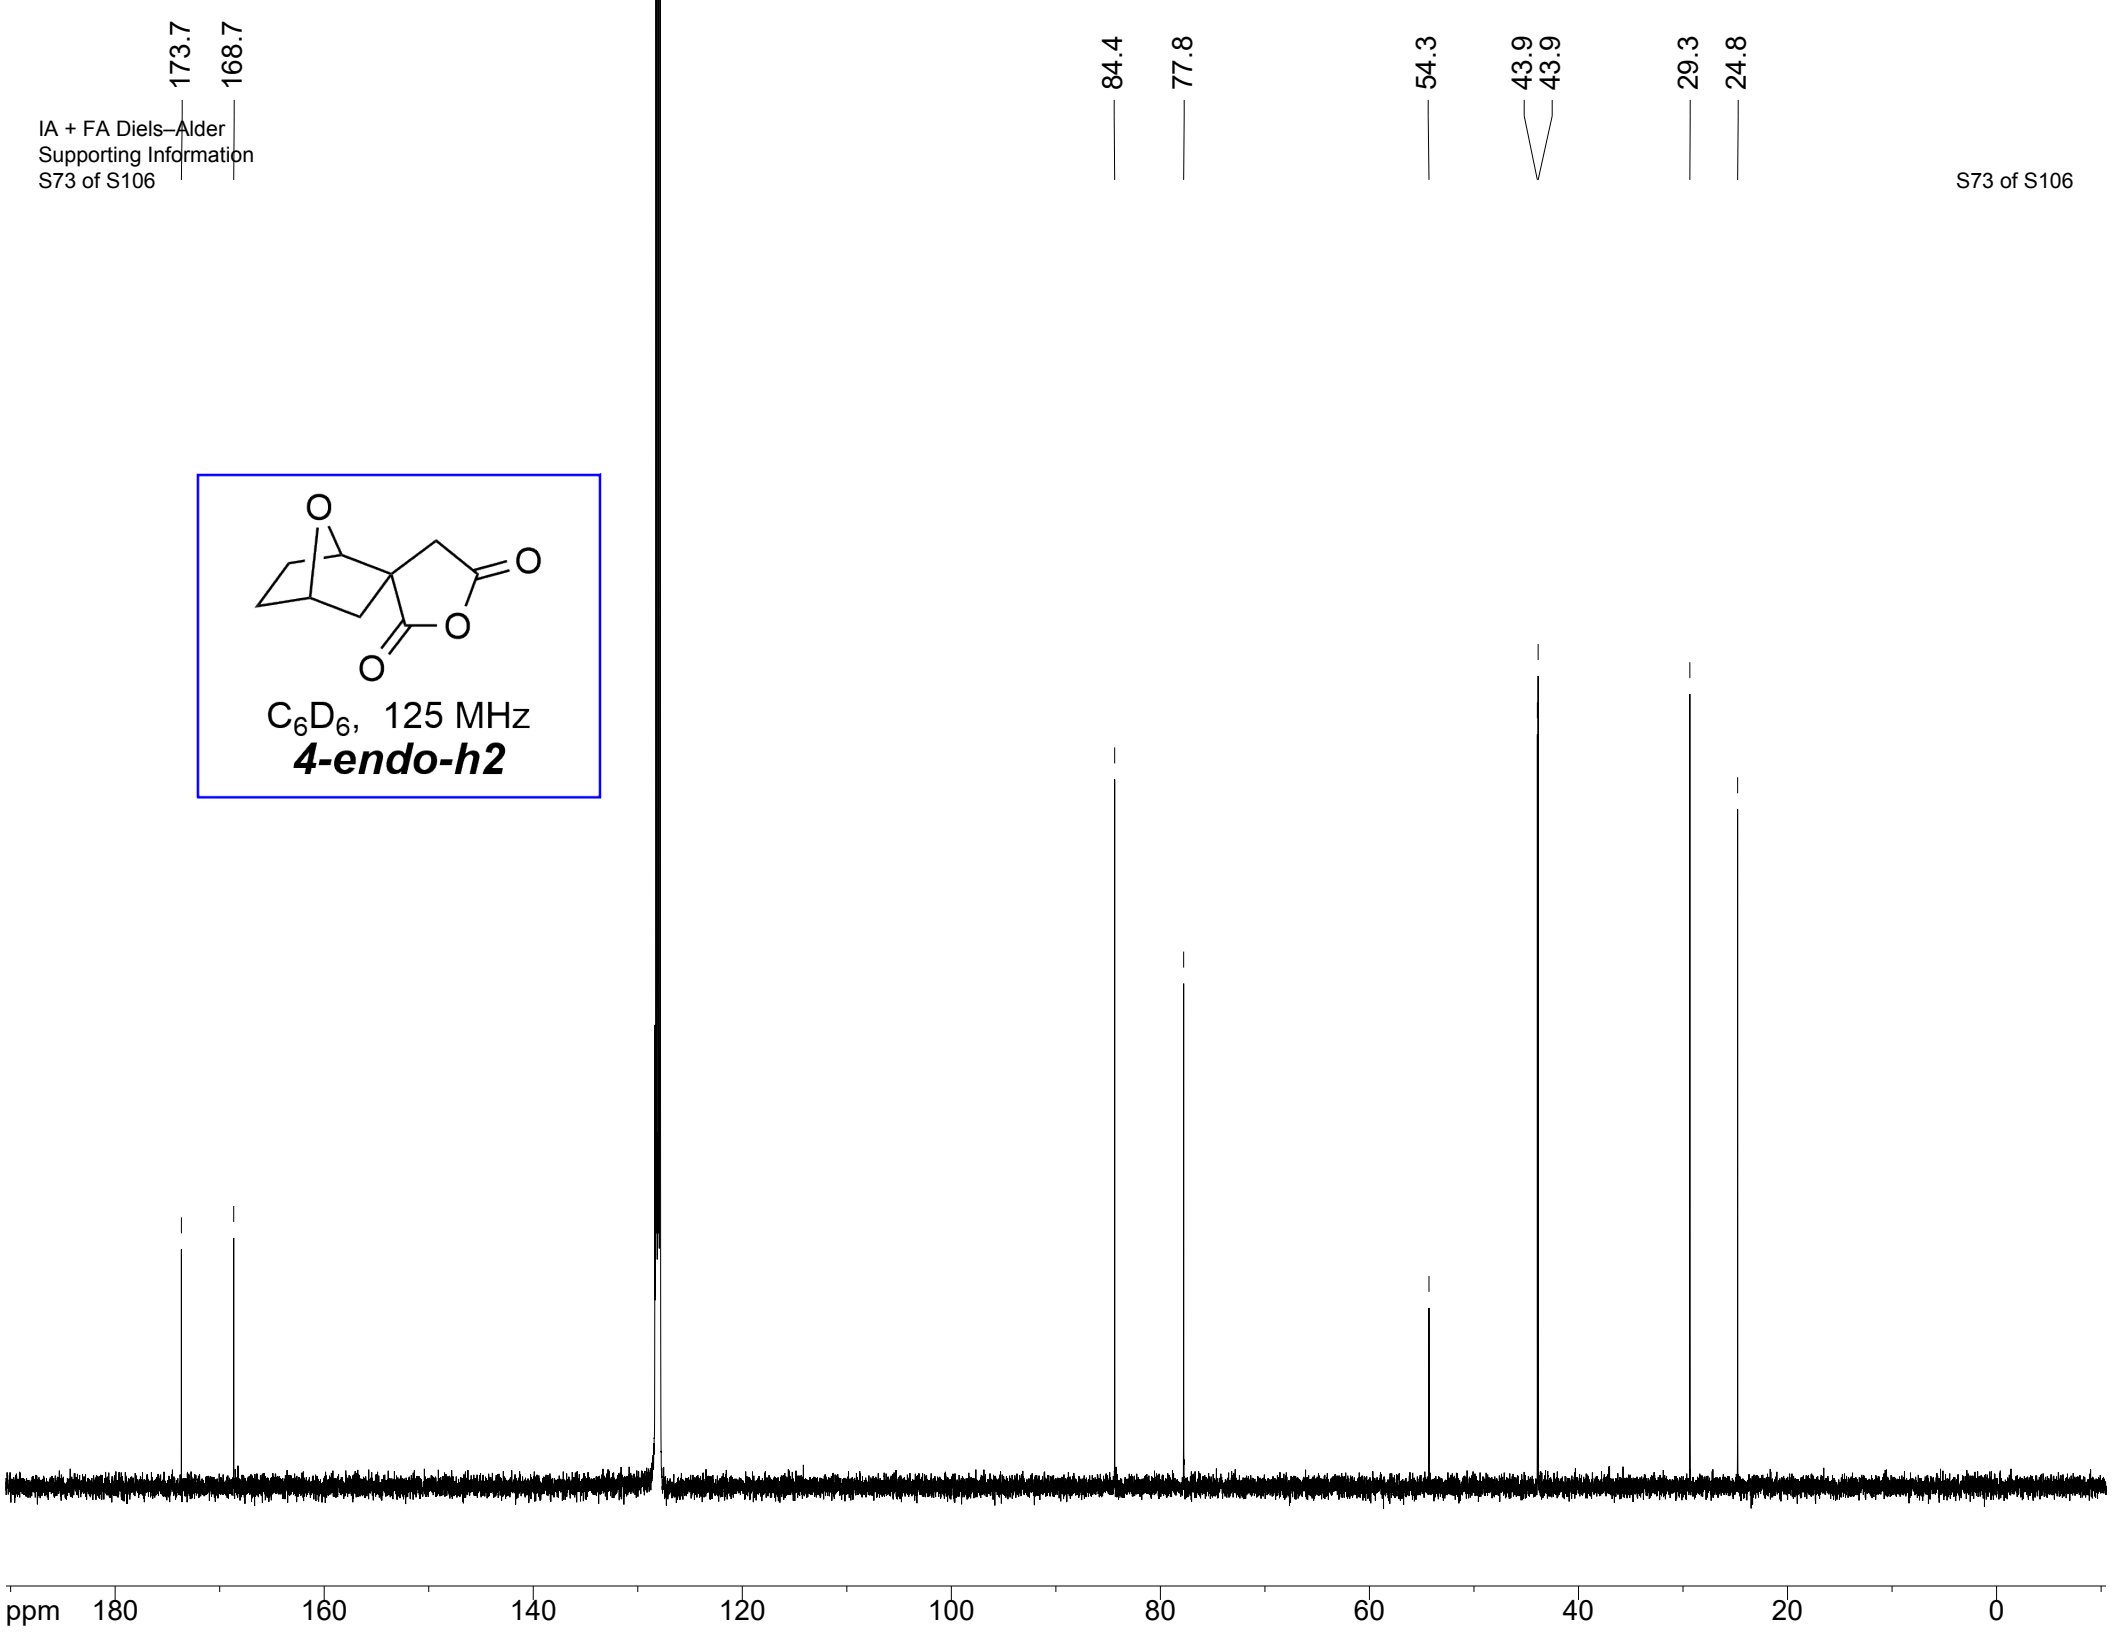

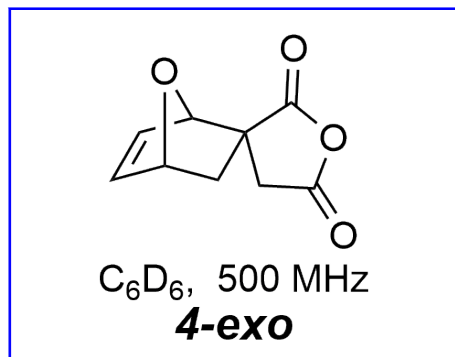

5.69  
5.68  
5.68  
5.67  
5.39  
5.38  
5.37

4.45  
4.44  
4.44  
4.44  
4.17

2.02  
2.01  
1.99  
1.98  
1.63  
1.59  
1.54  
1.50

0.31  
0.31  
0.29  
0.29

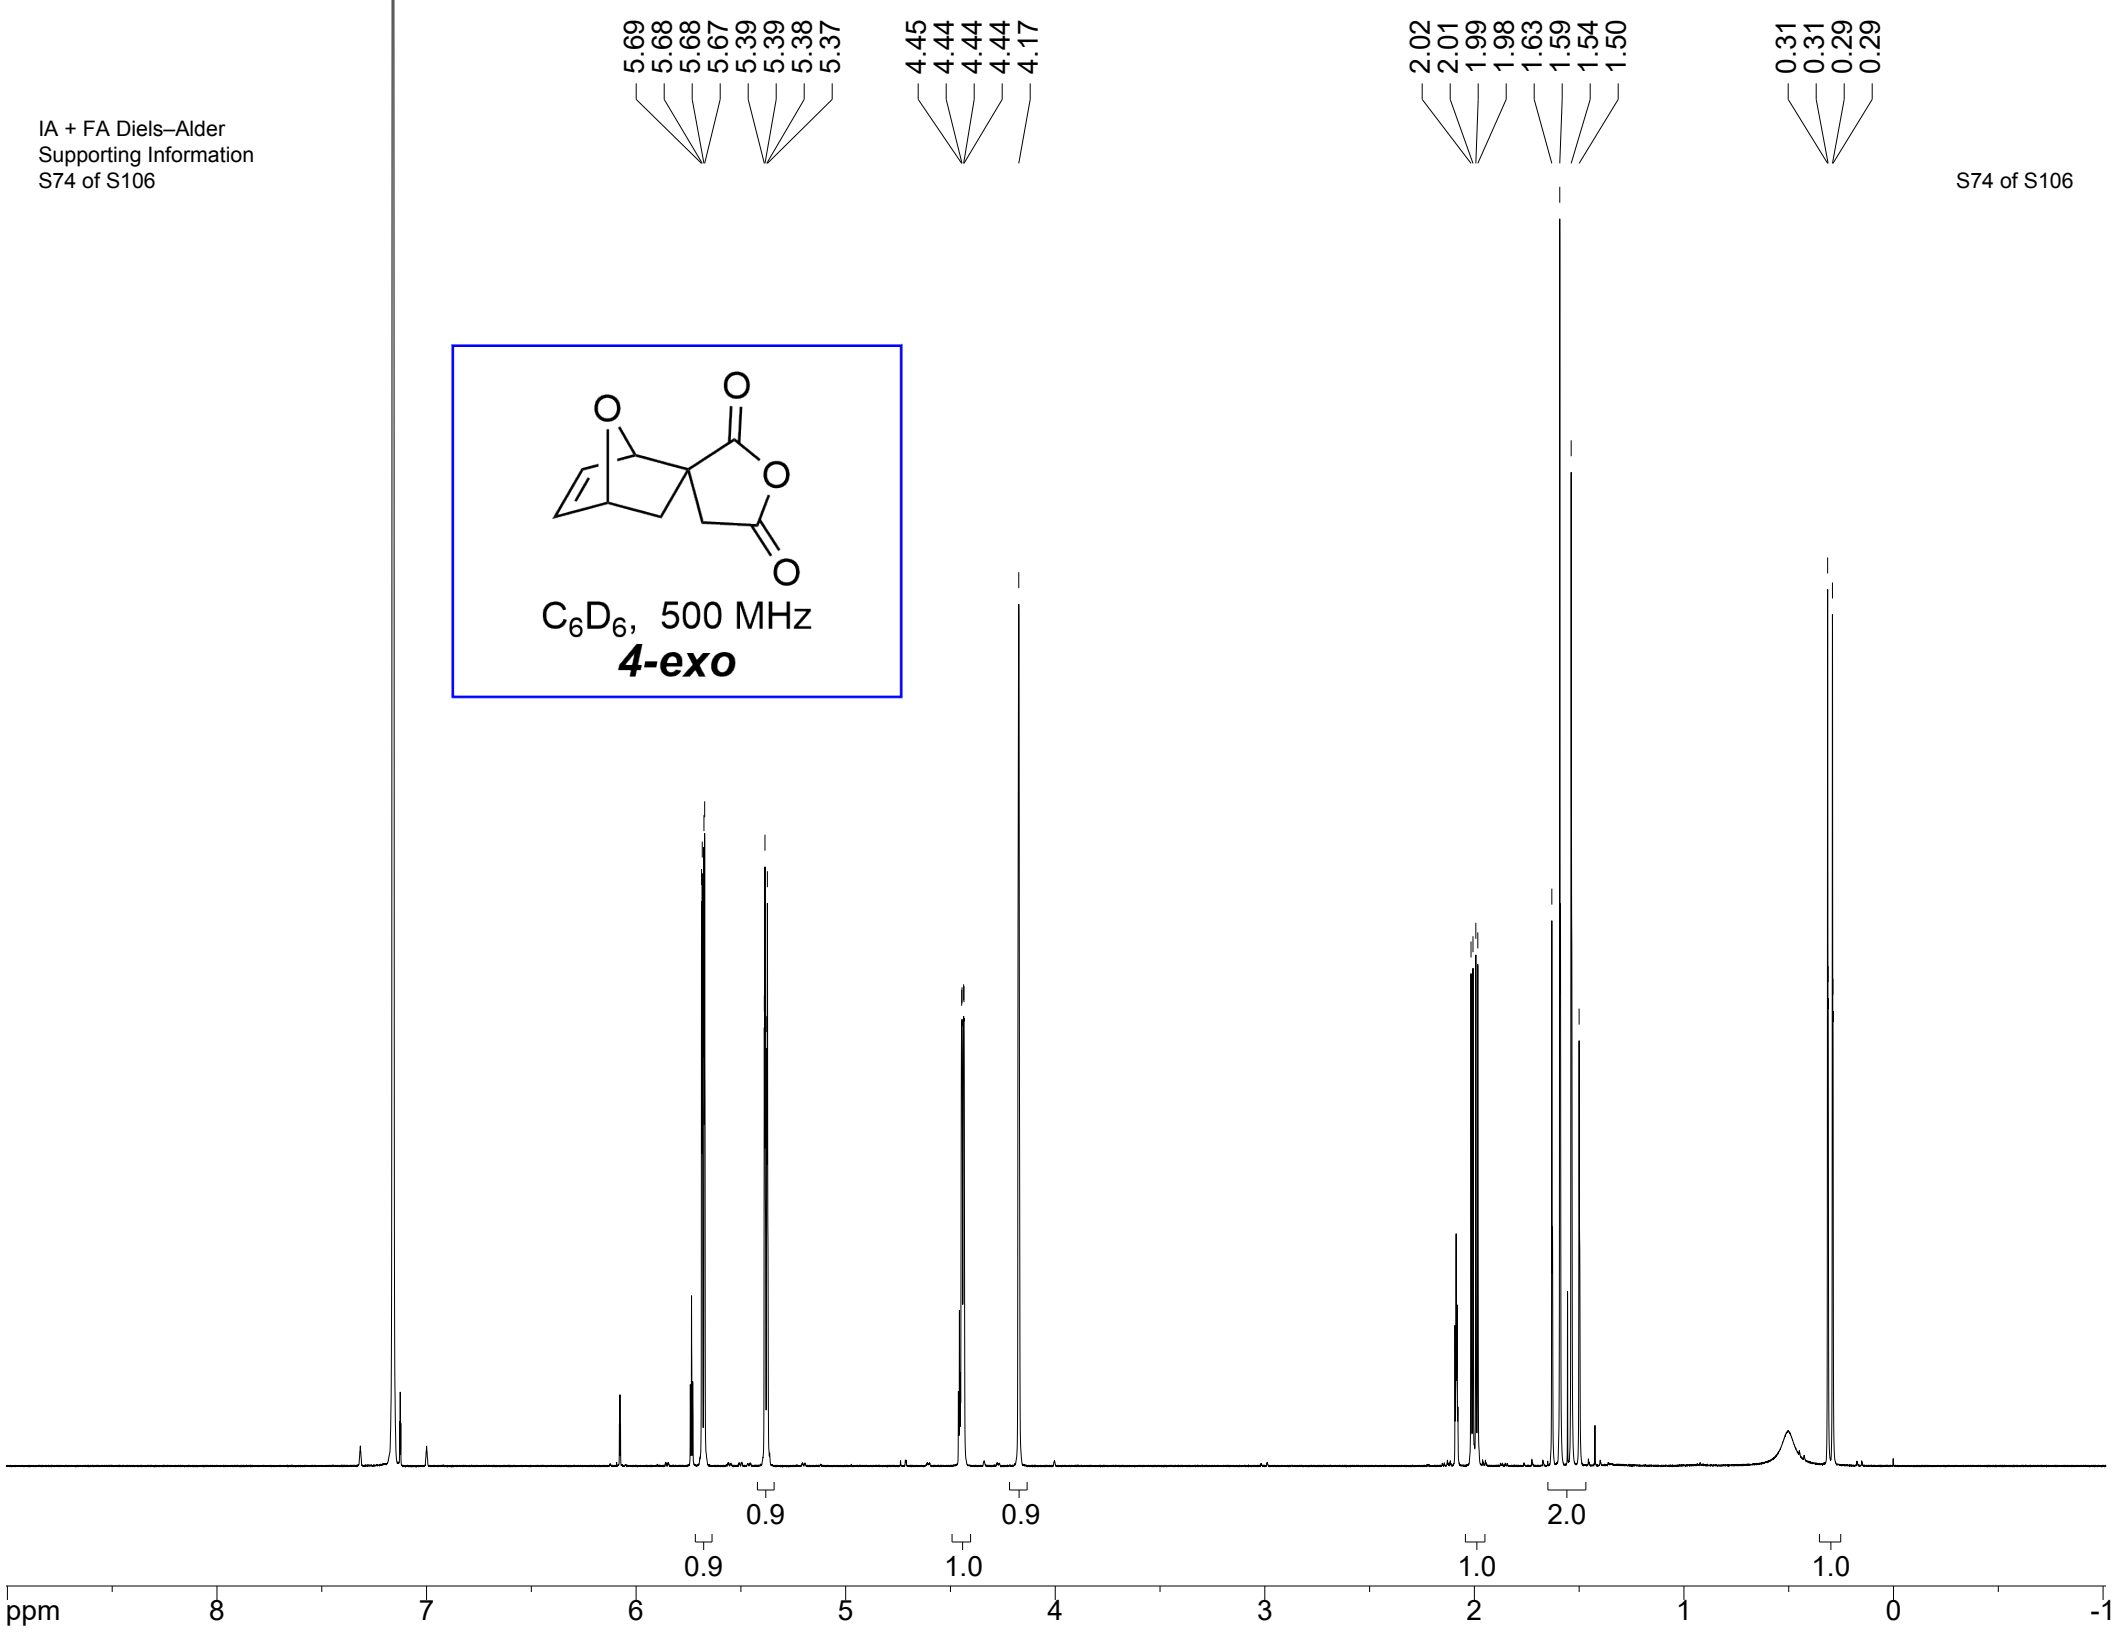

6.72  
6.72  
6.71  
6.70  
6.49  
6.49  
6.48  
6.48  
5.27  
5.27  
5.26  
5.26  
5.11  
5.11

2.77  
2.77  
2.73  
2.72  
2.71  
2.70

1.54  
1.52

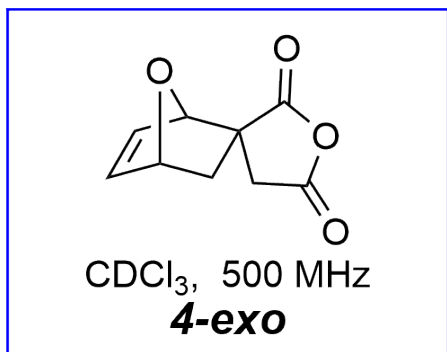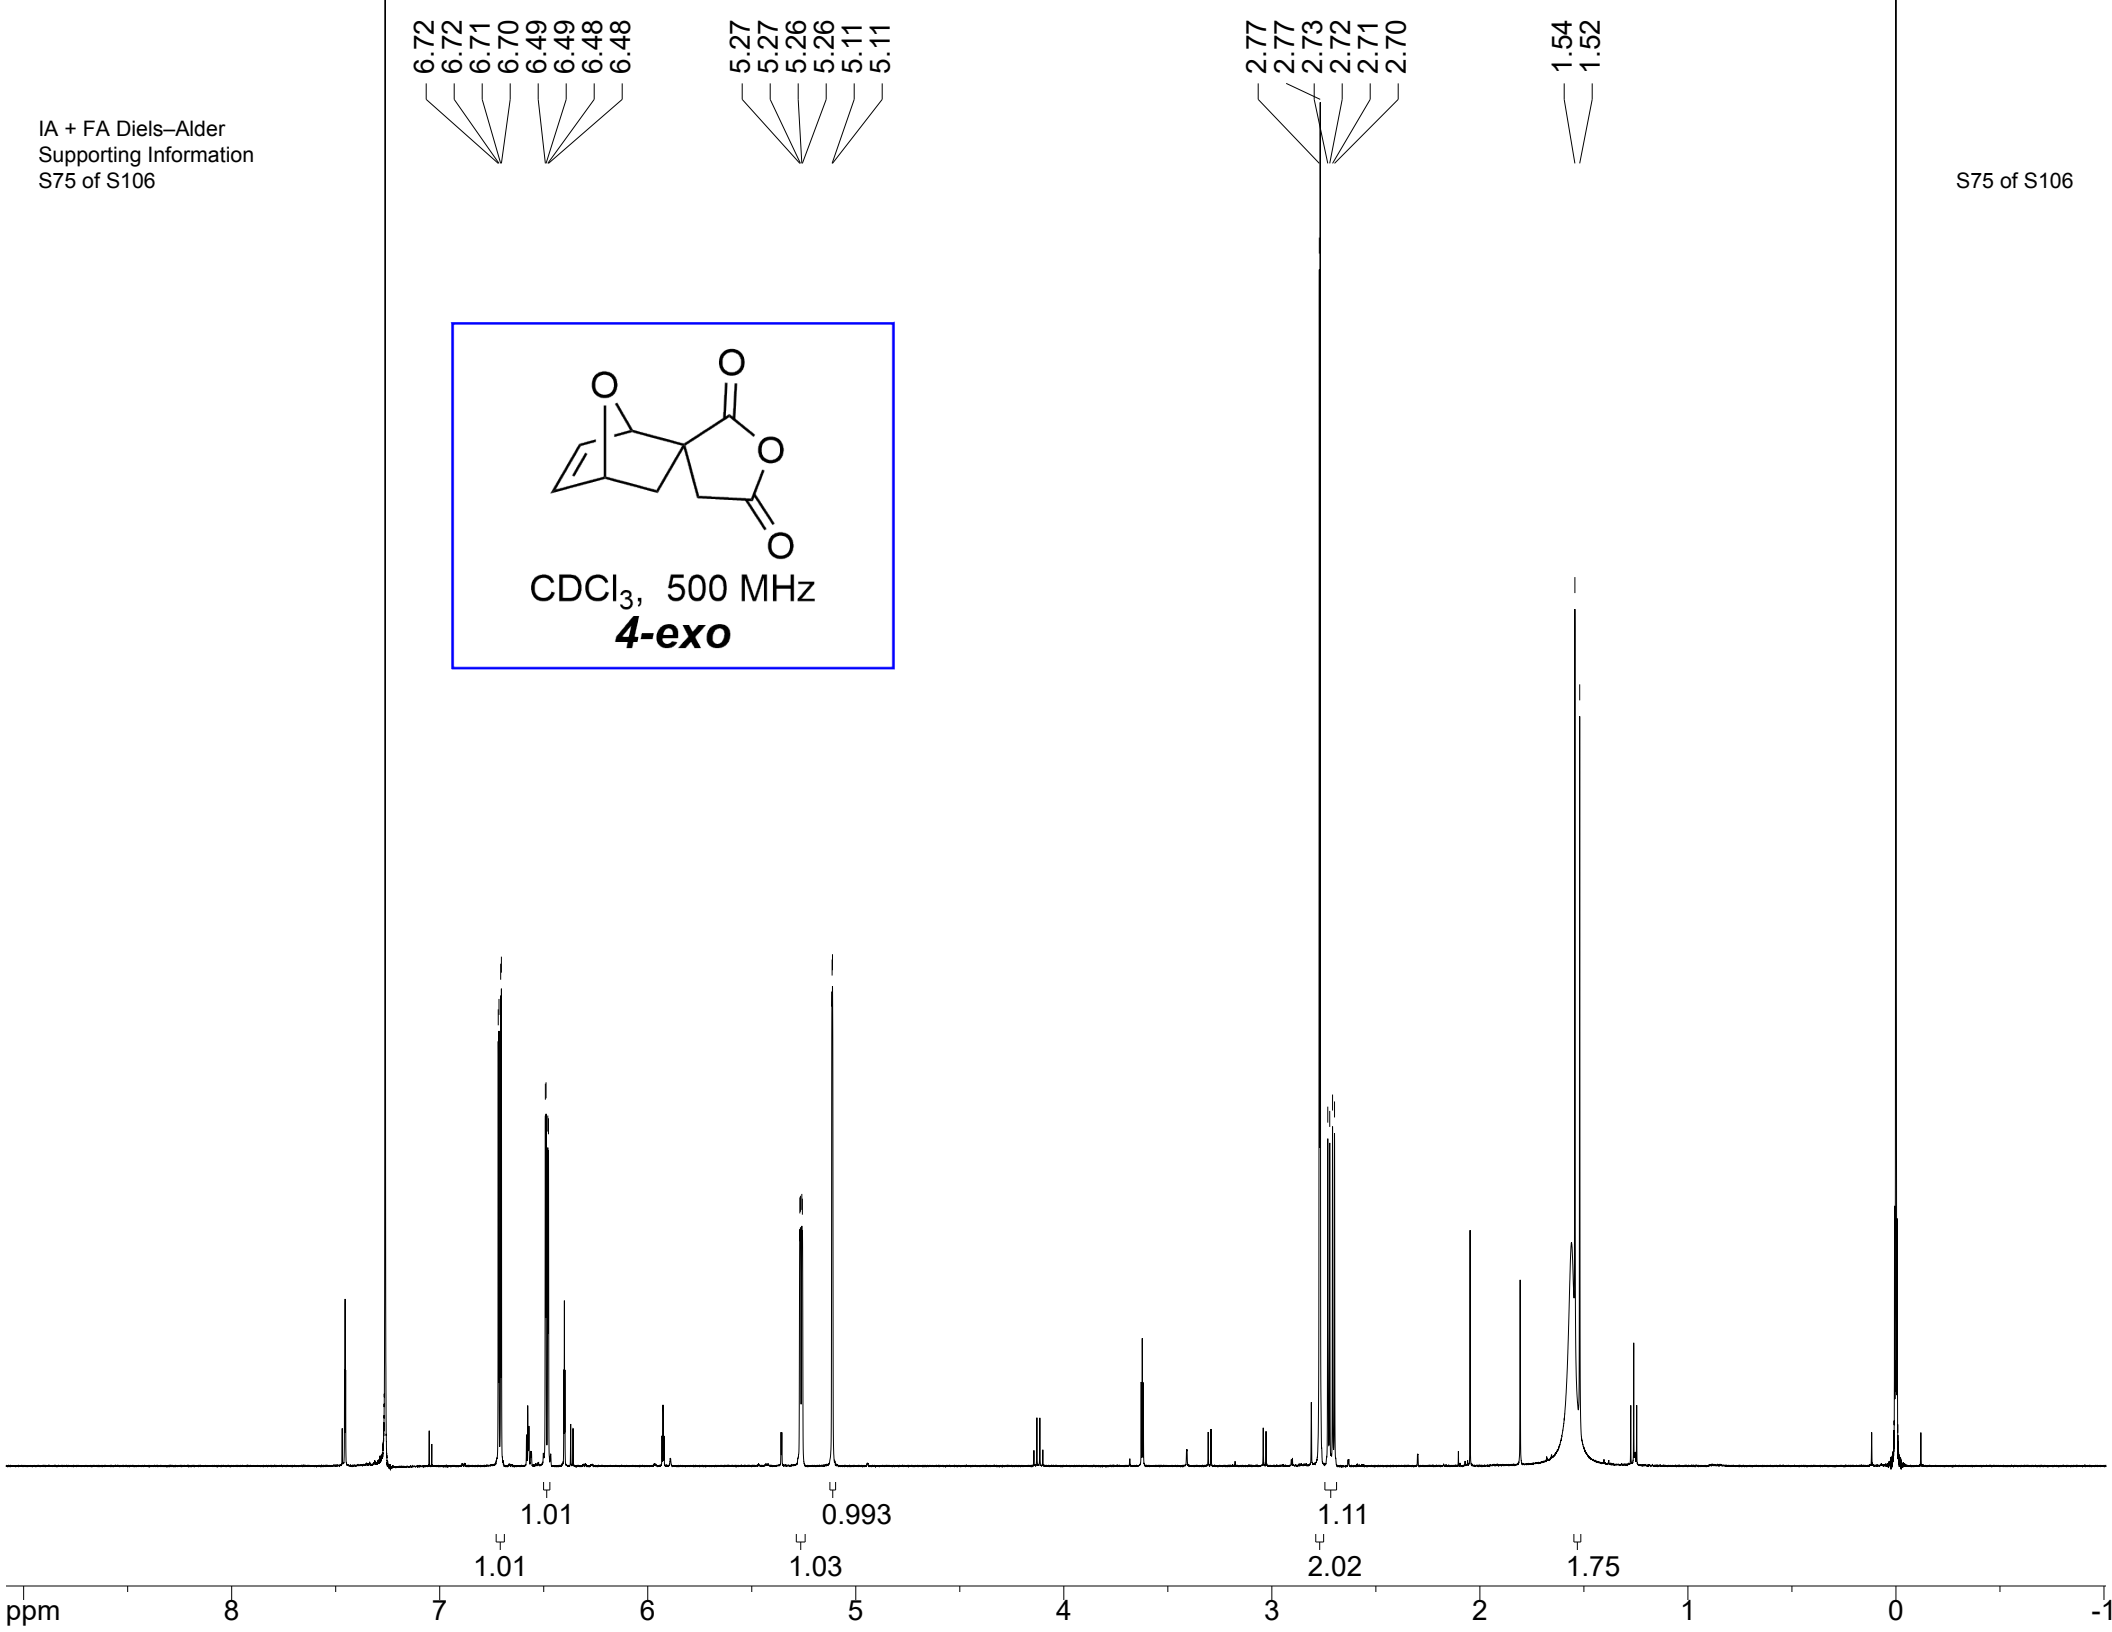

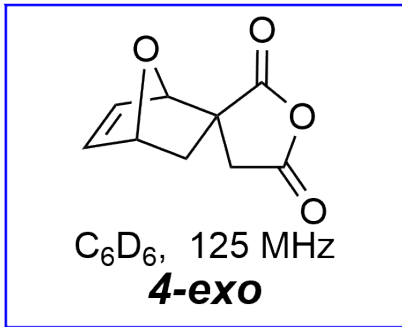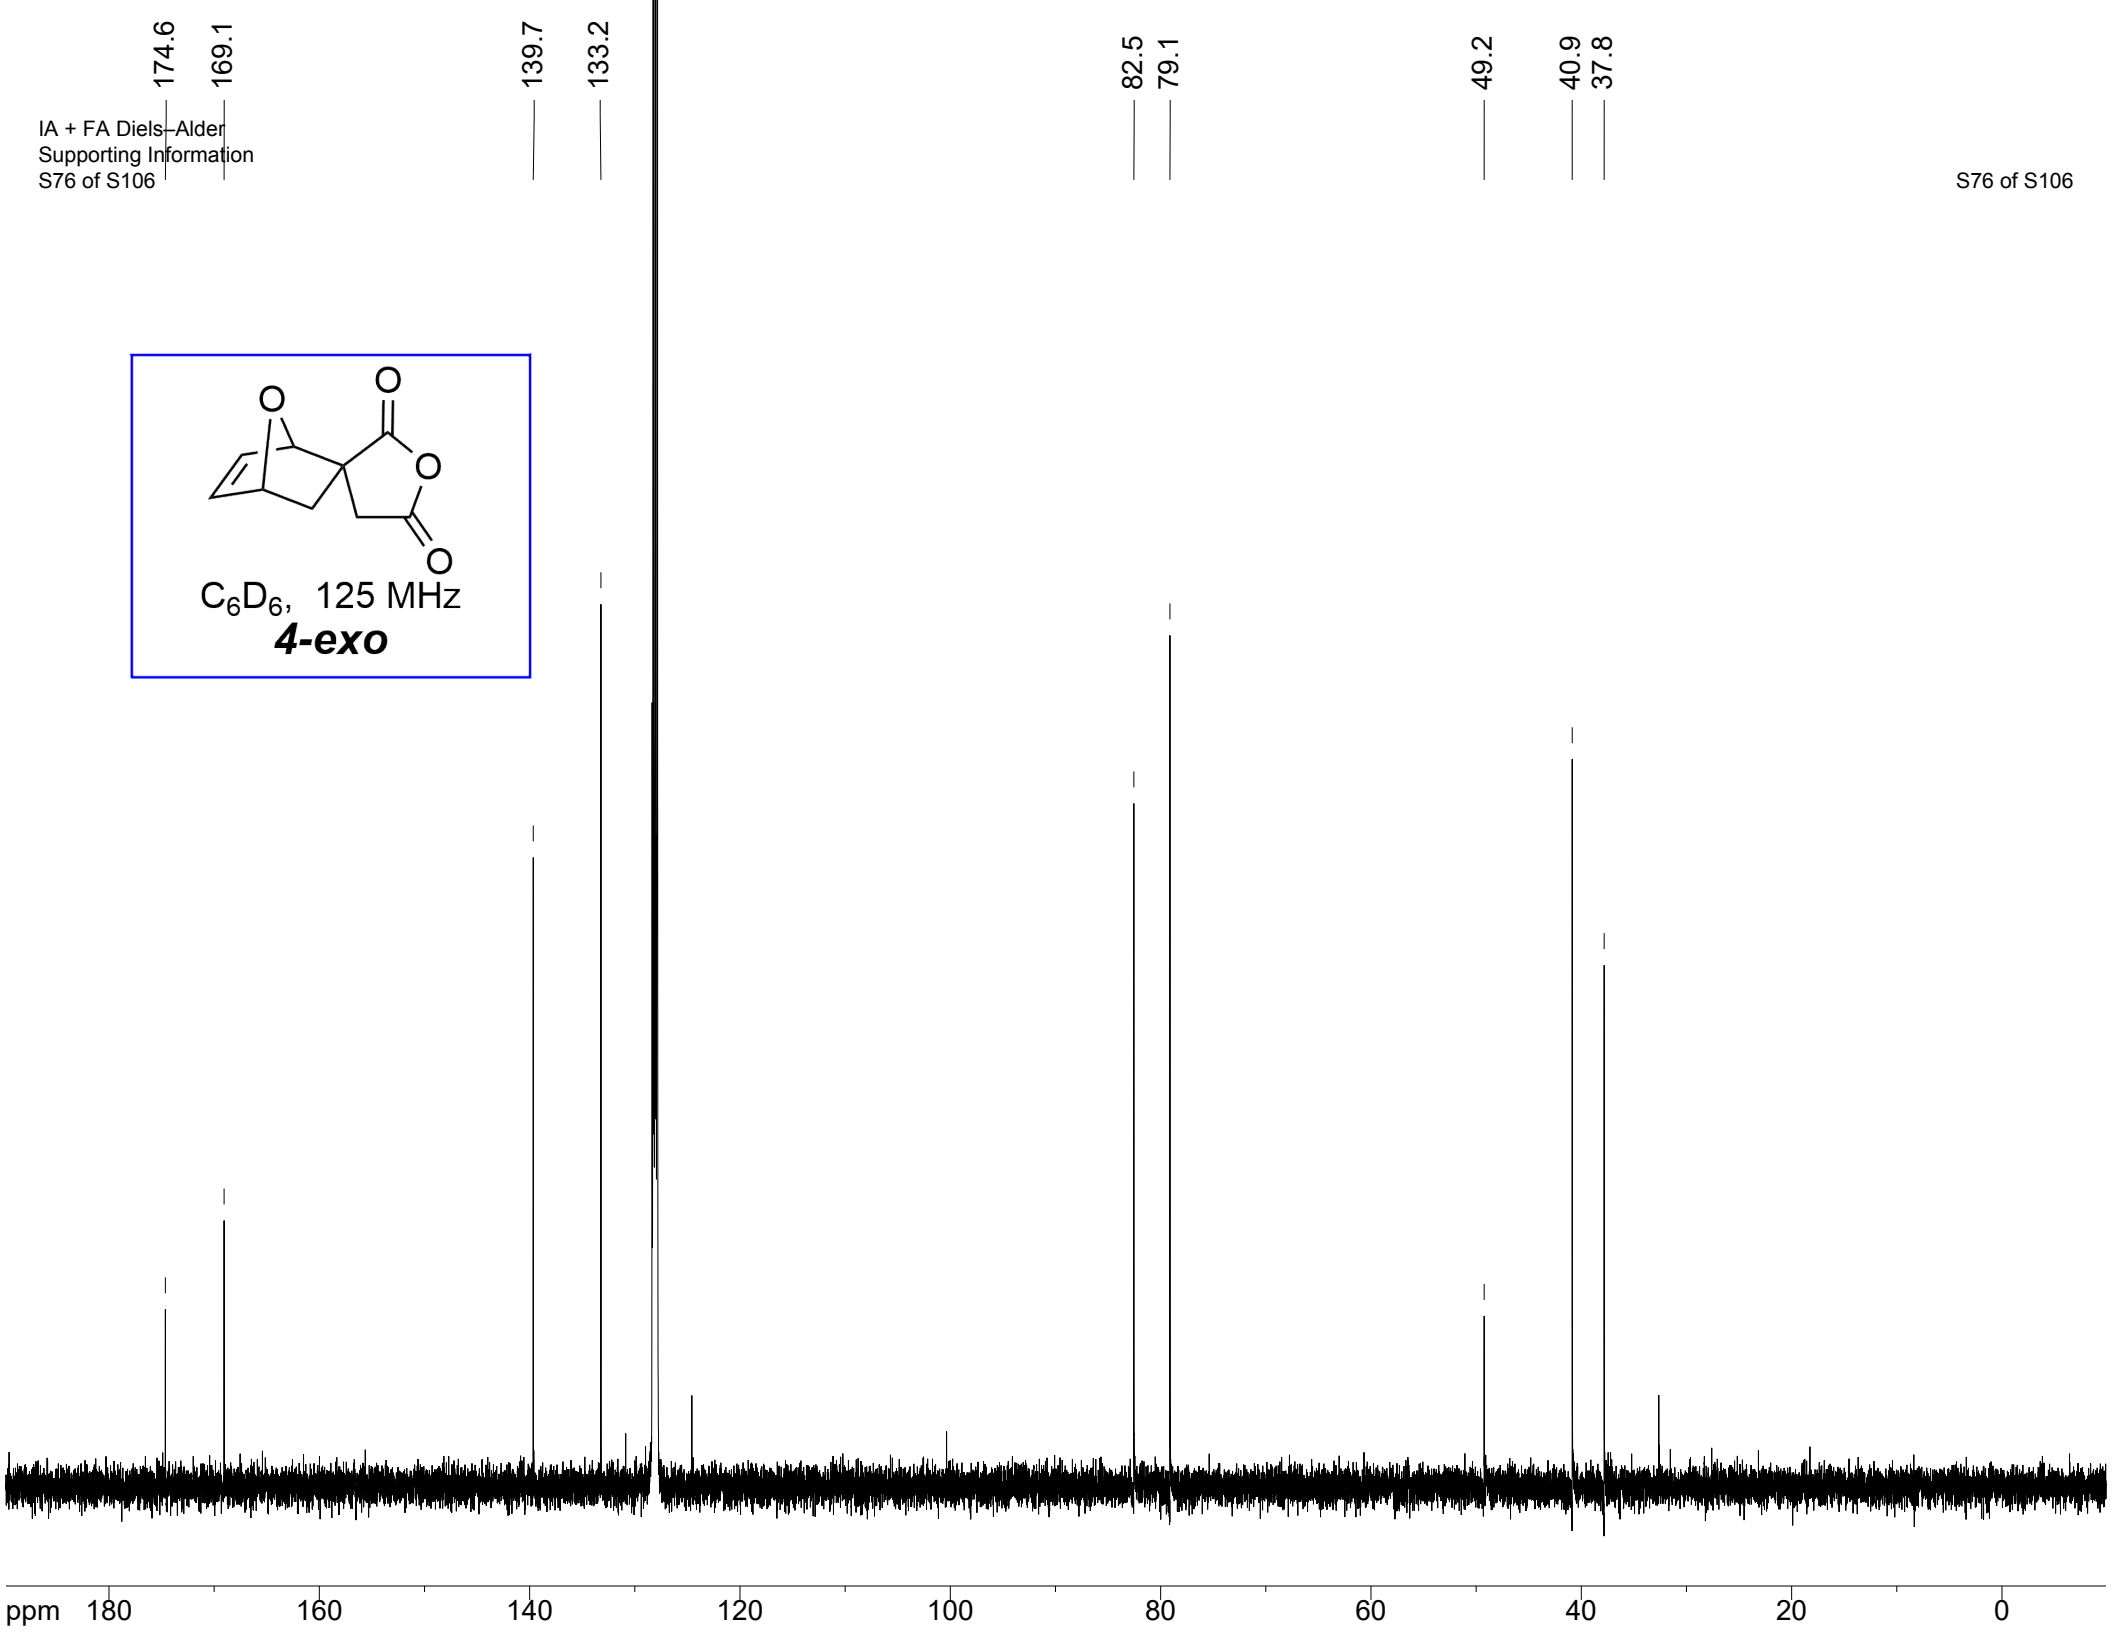





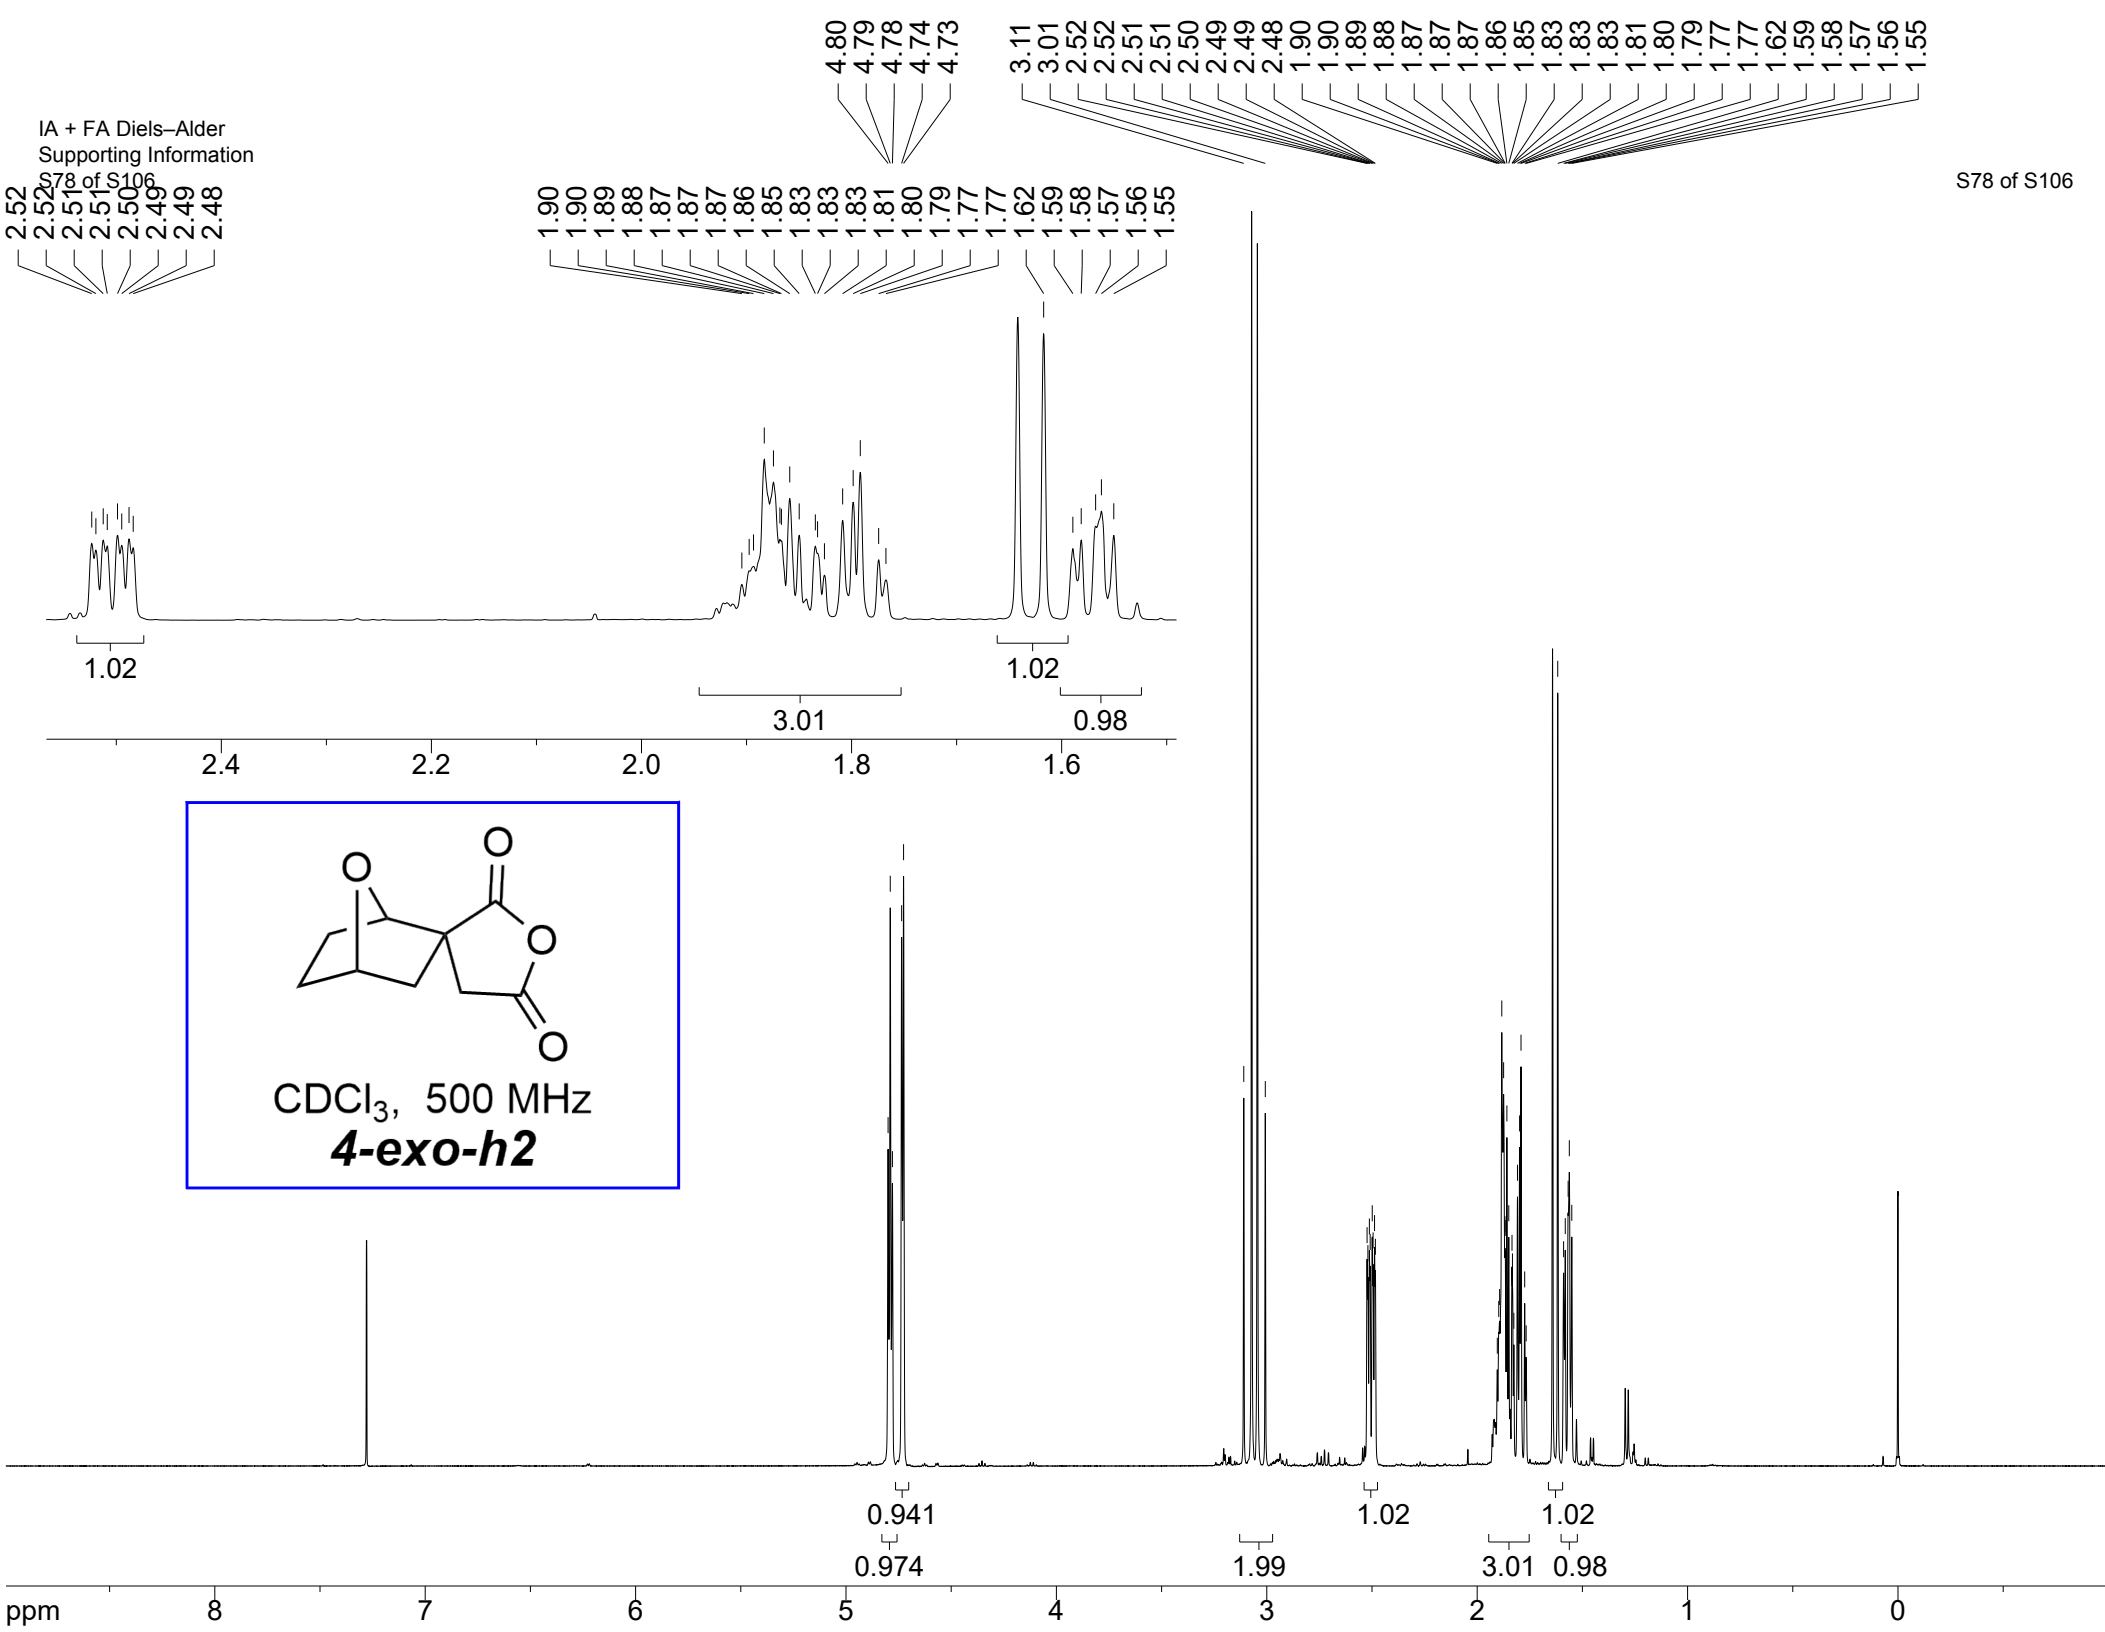

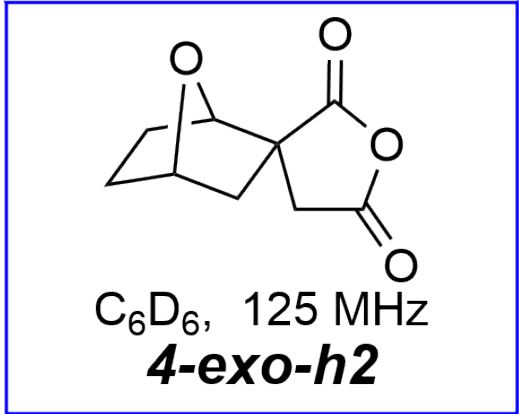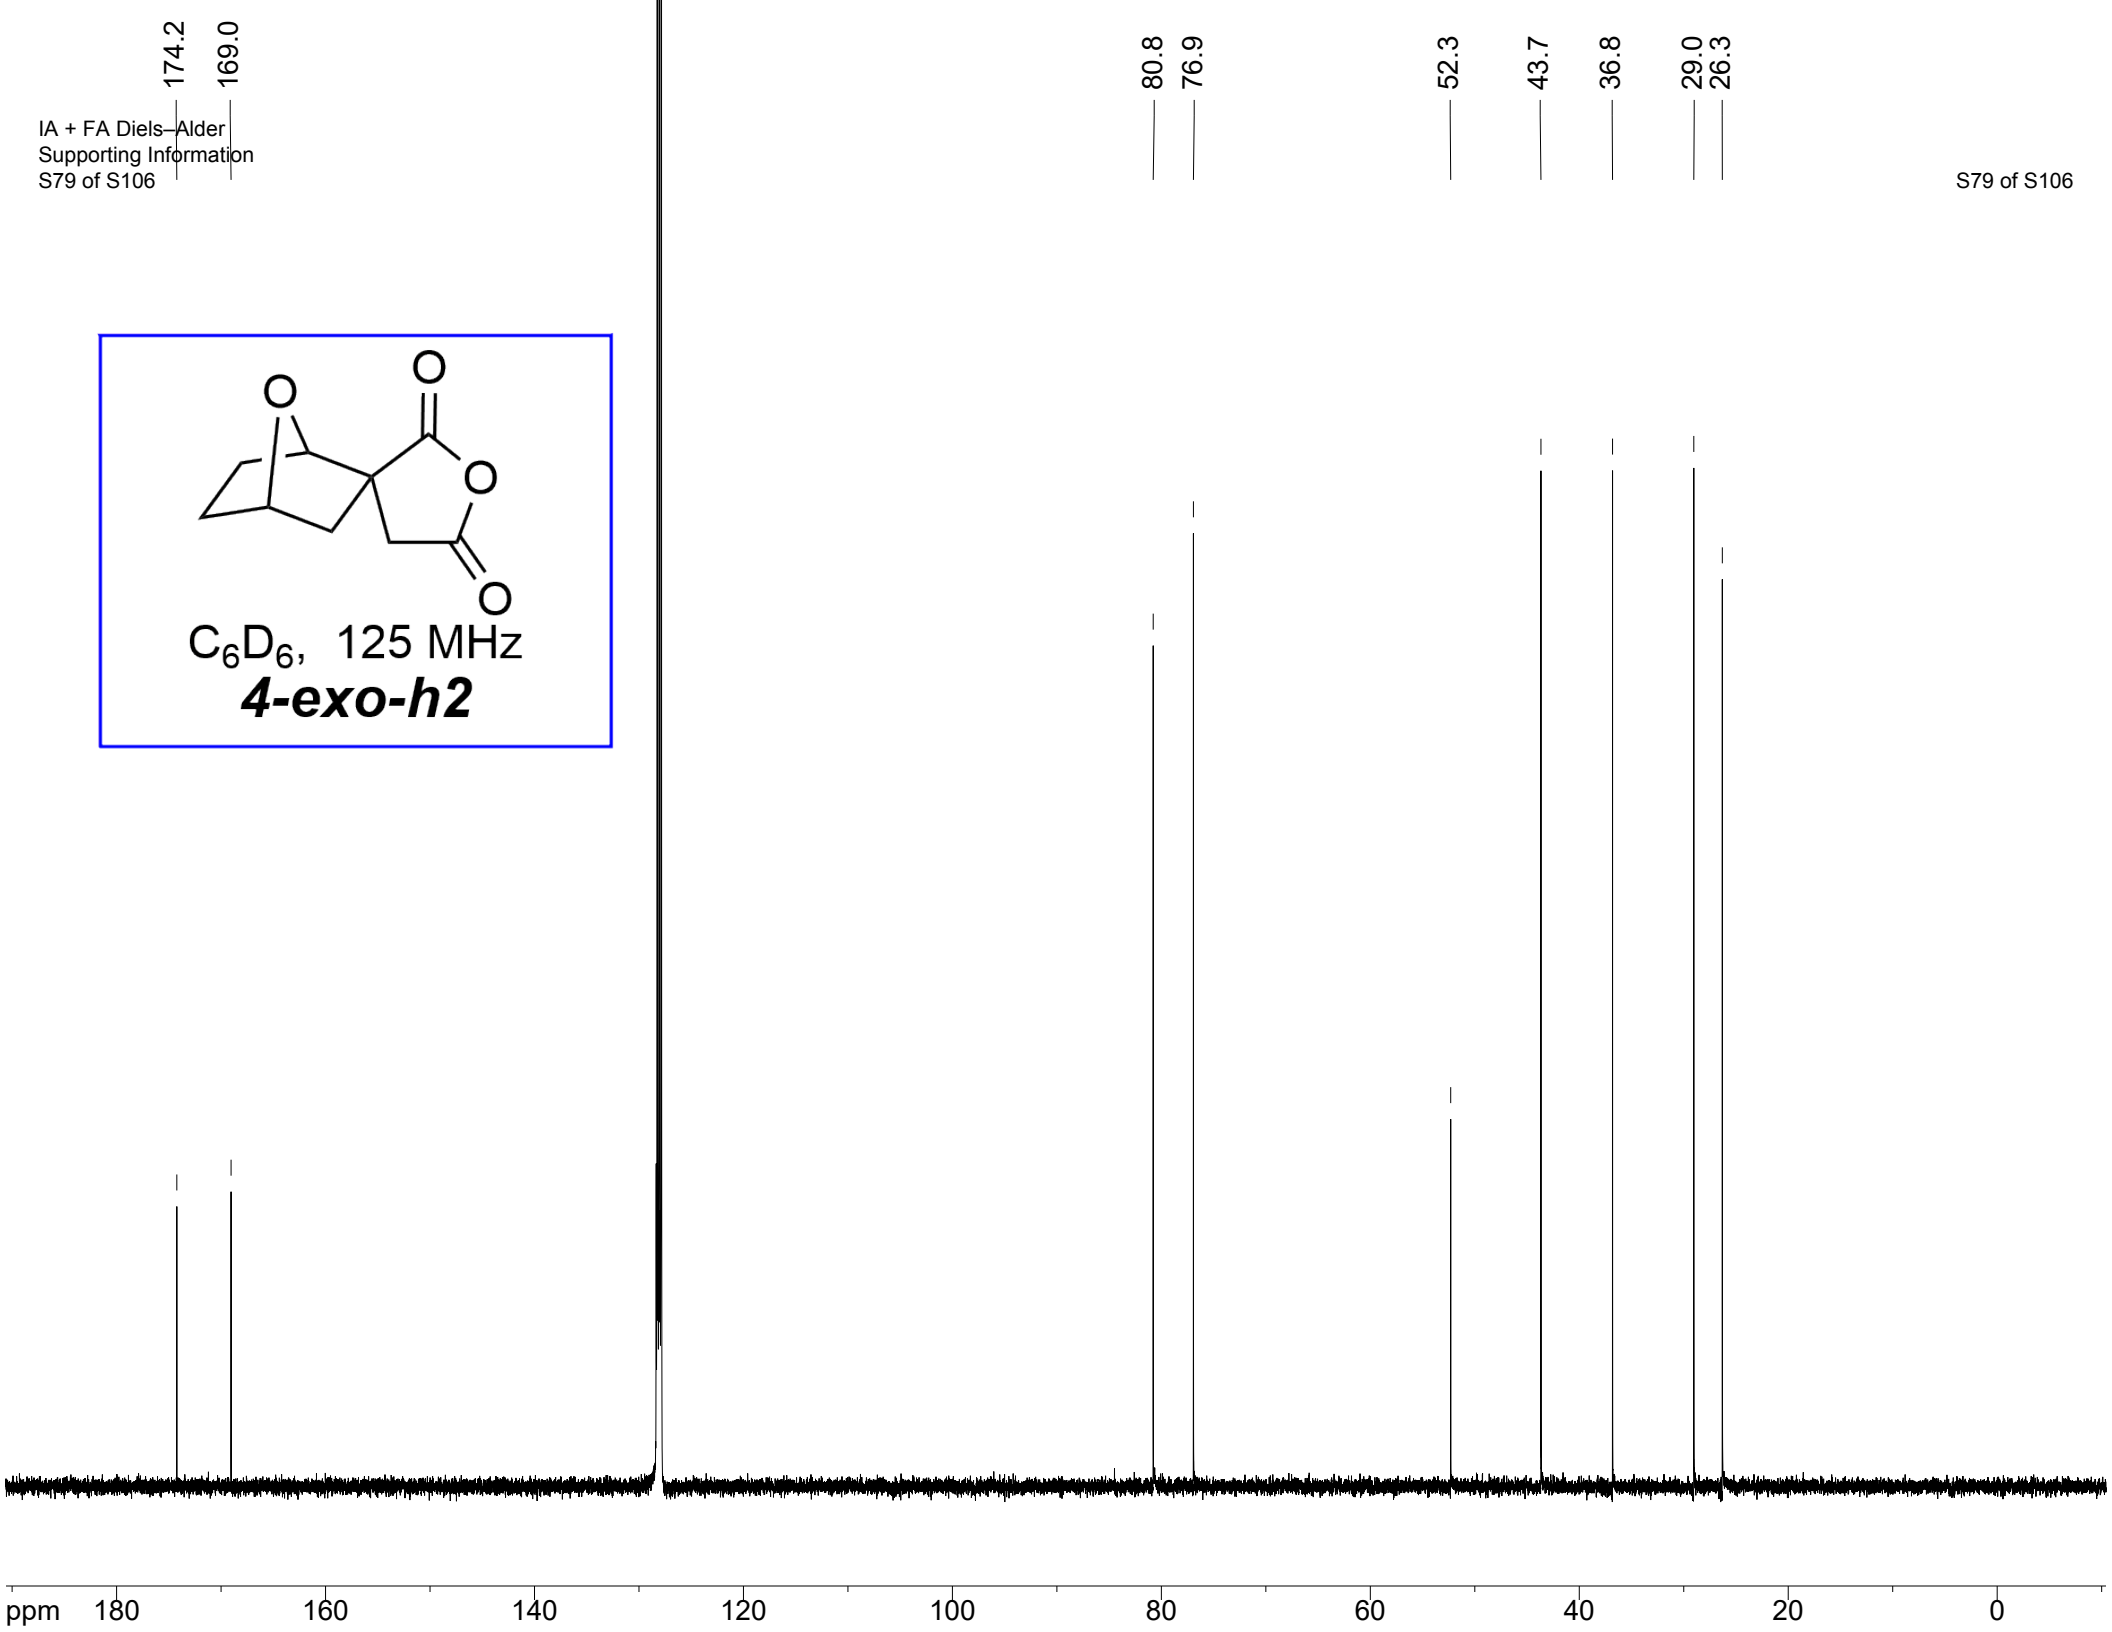

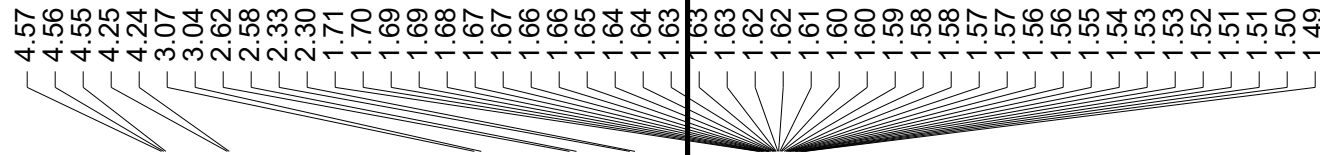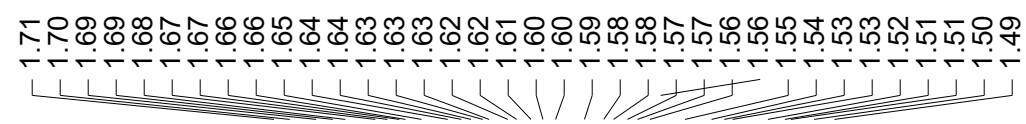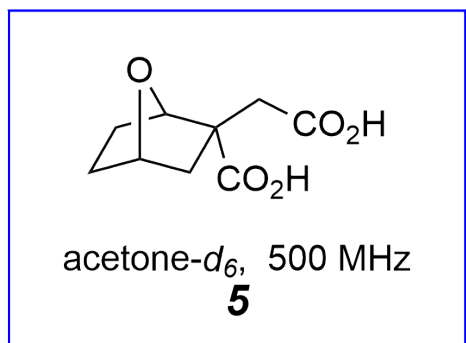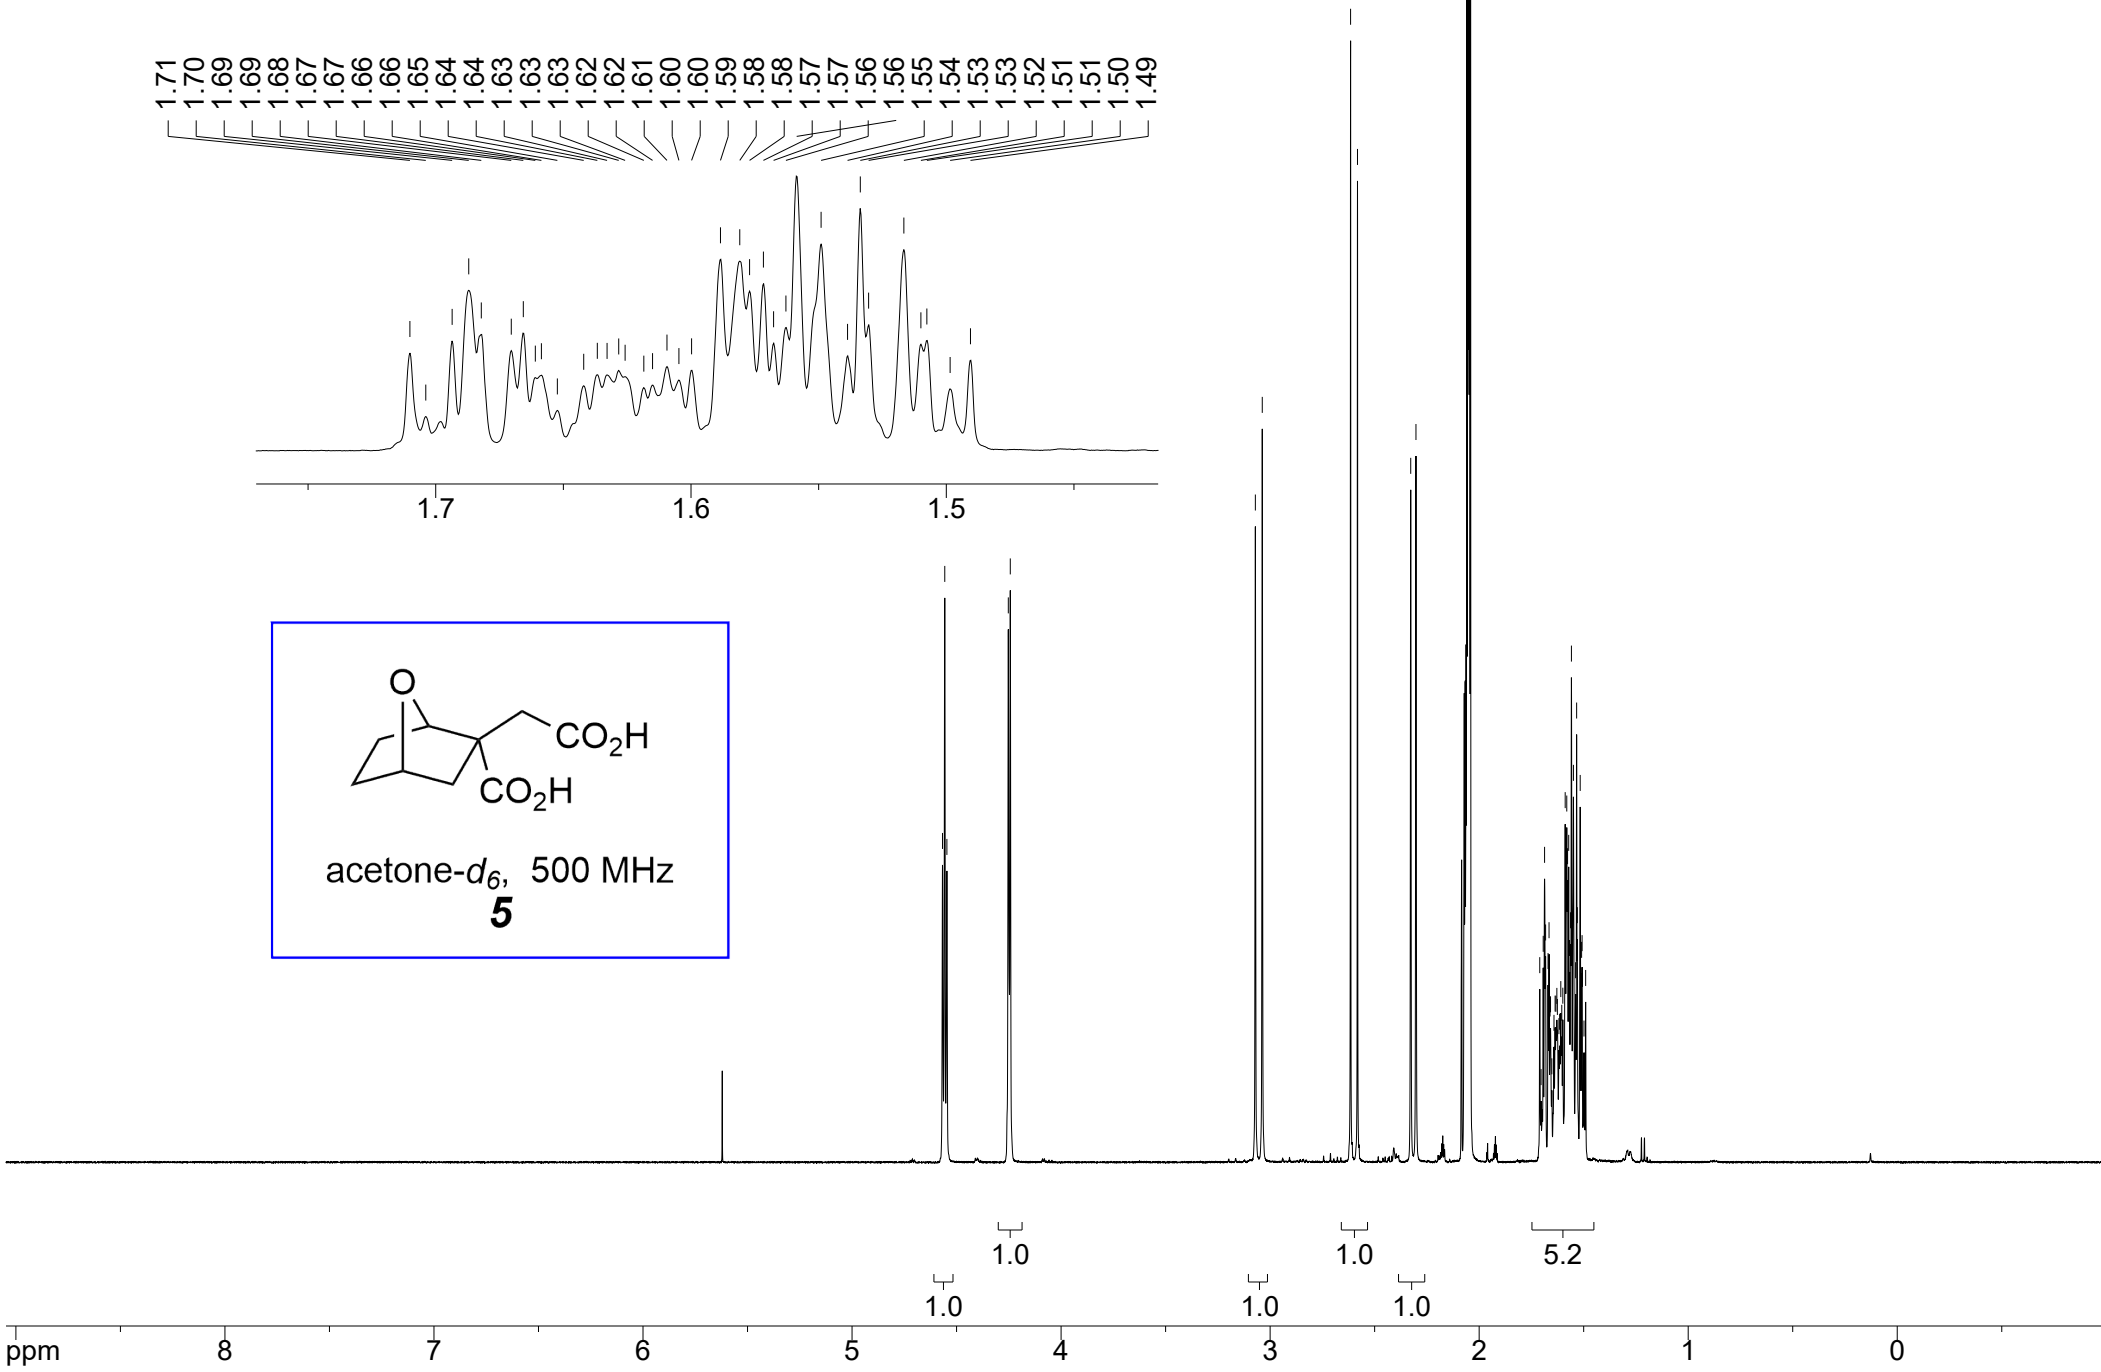

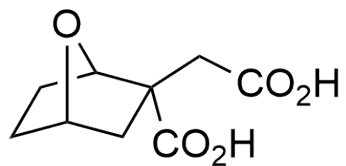

acetone-*d*<sub>6</sub>, 125 MHz  
**5**

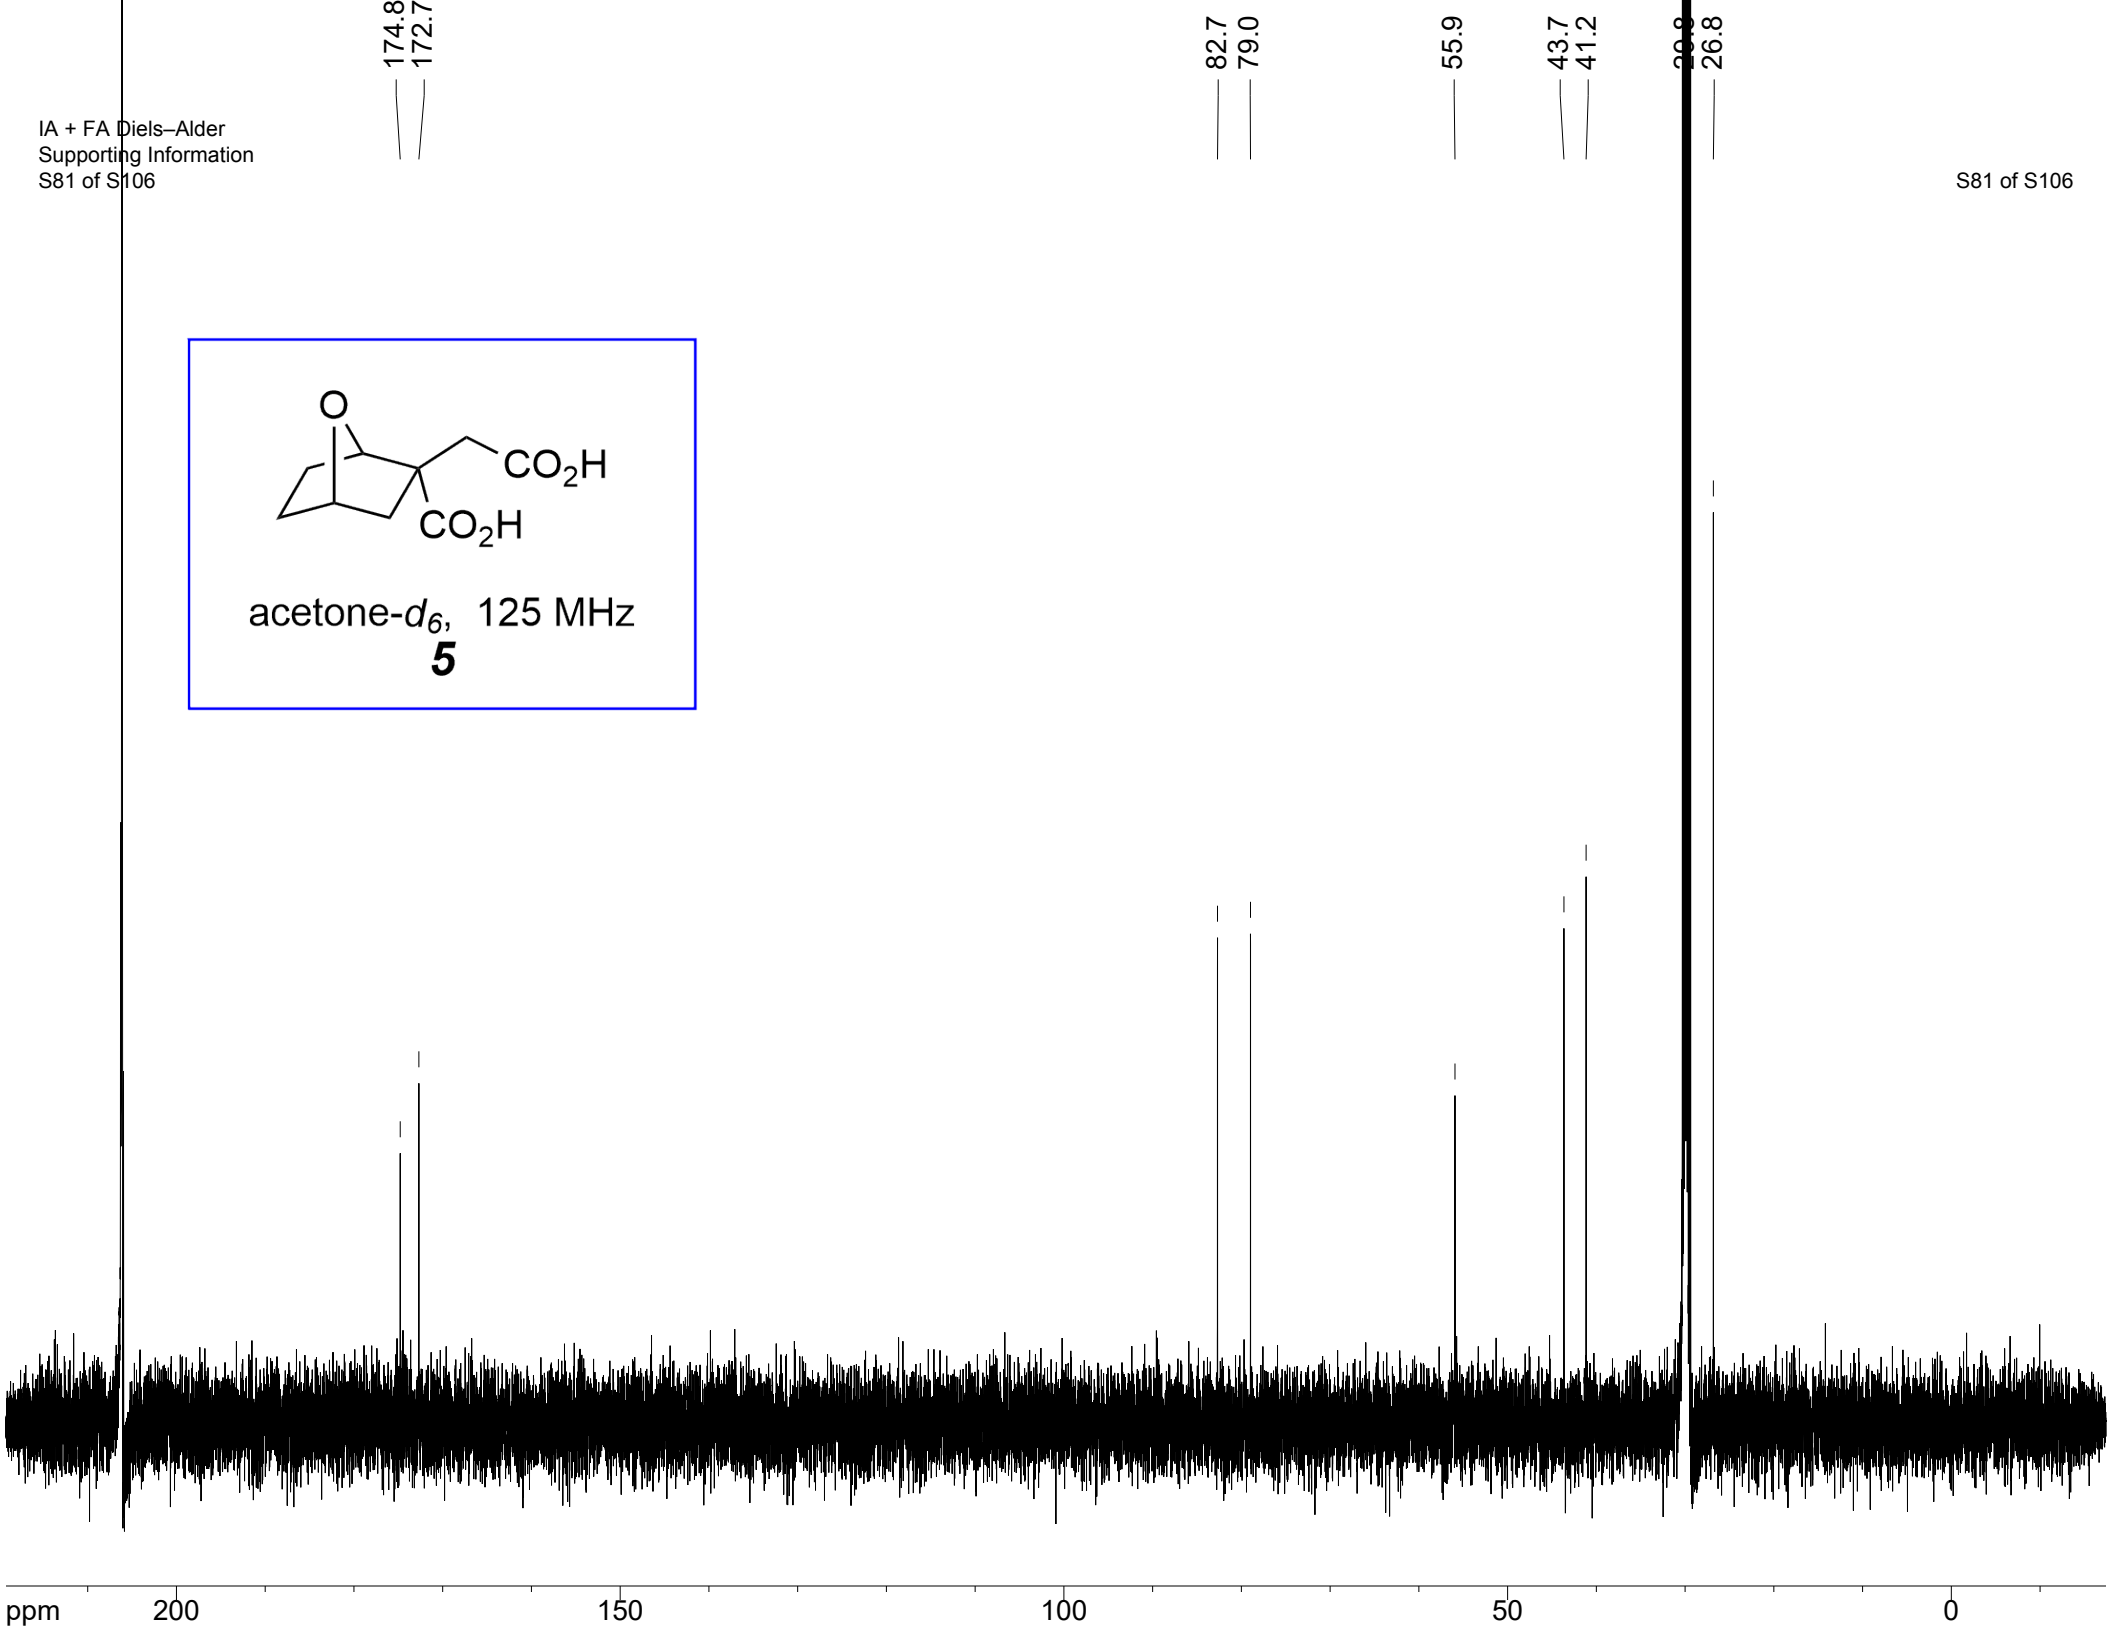

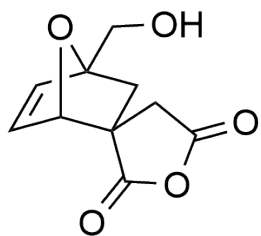

CDCl<sub>3</sub>, 500 MHz  
**12-dist-endo**

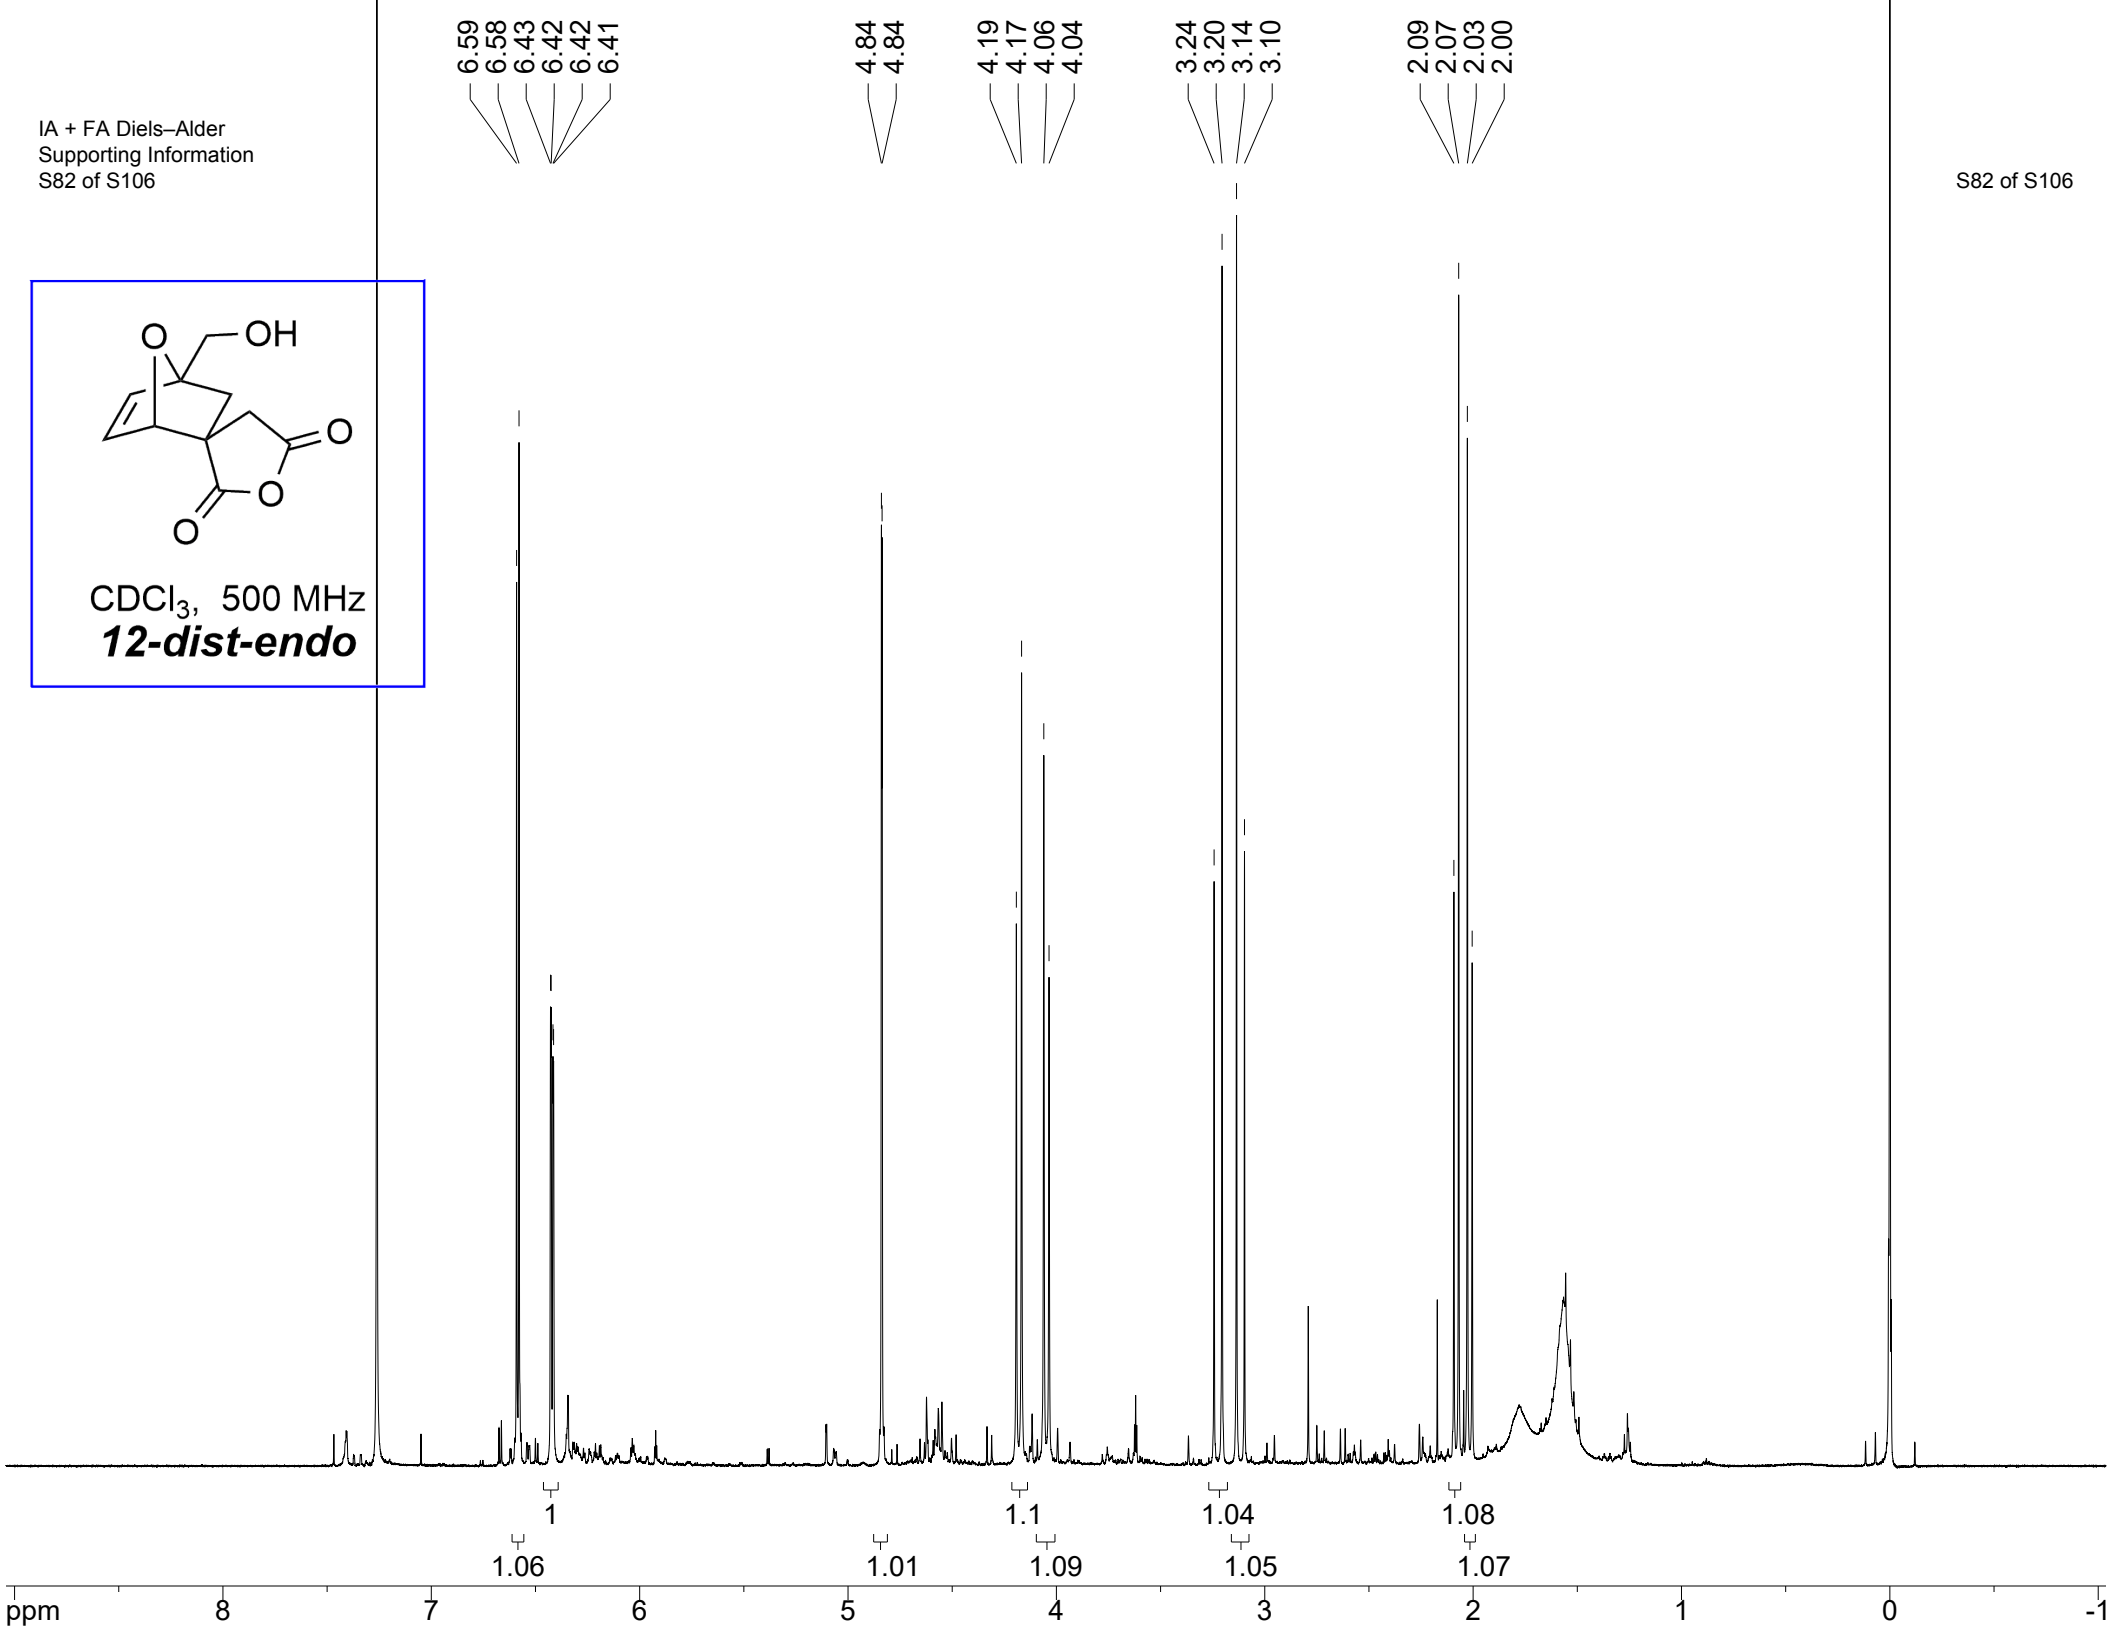

6.68  
6.66  
6.54  
6.54  
6.53  
6.53

5.32  
5.11  
5.10

4.19  
4.17  
4.12  
4.09  
3.72

2.79  
2.64  
2.61

1.56  
1.53

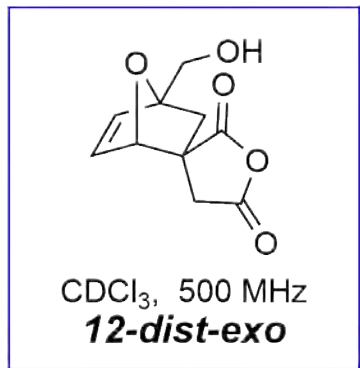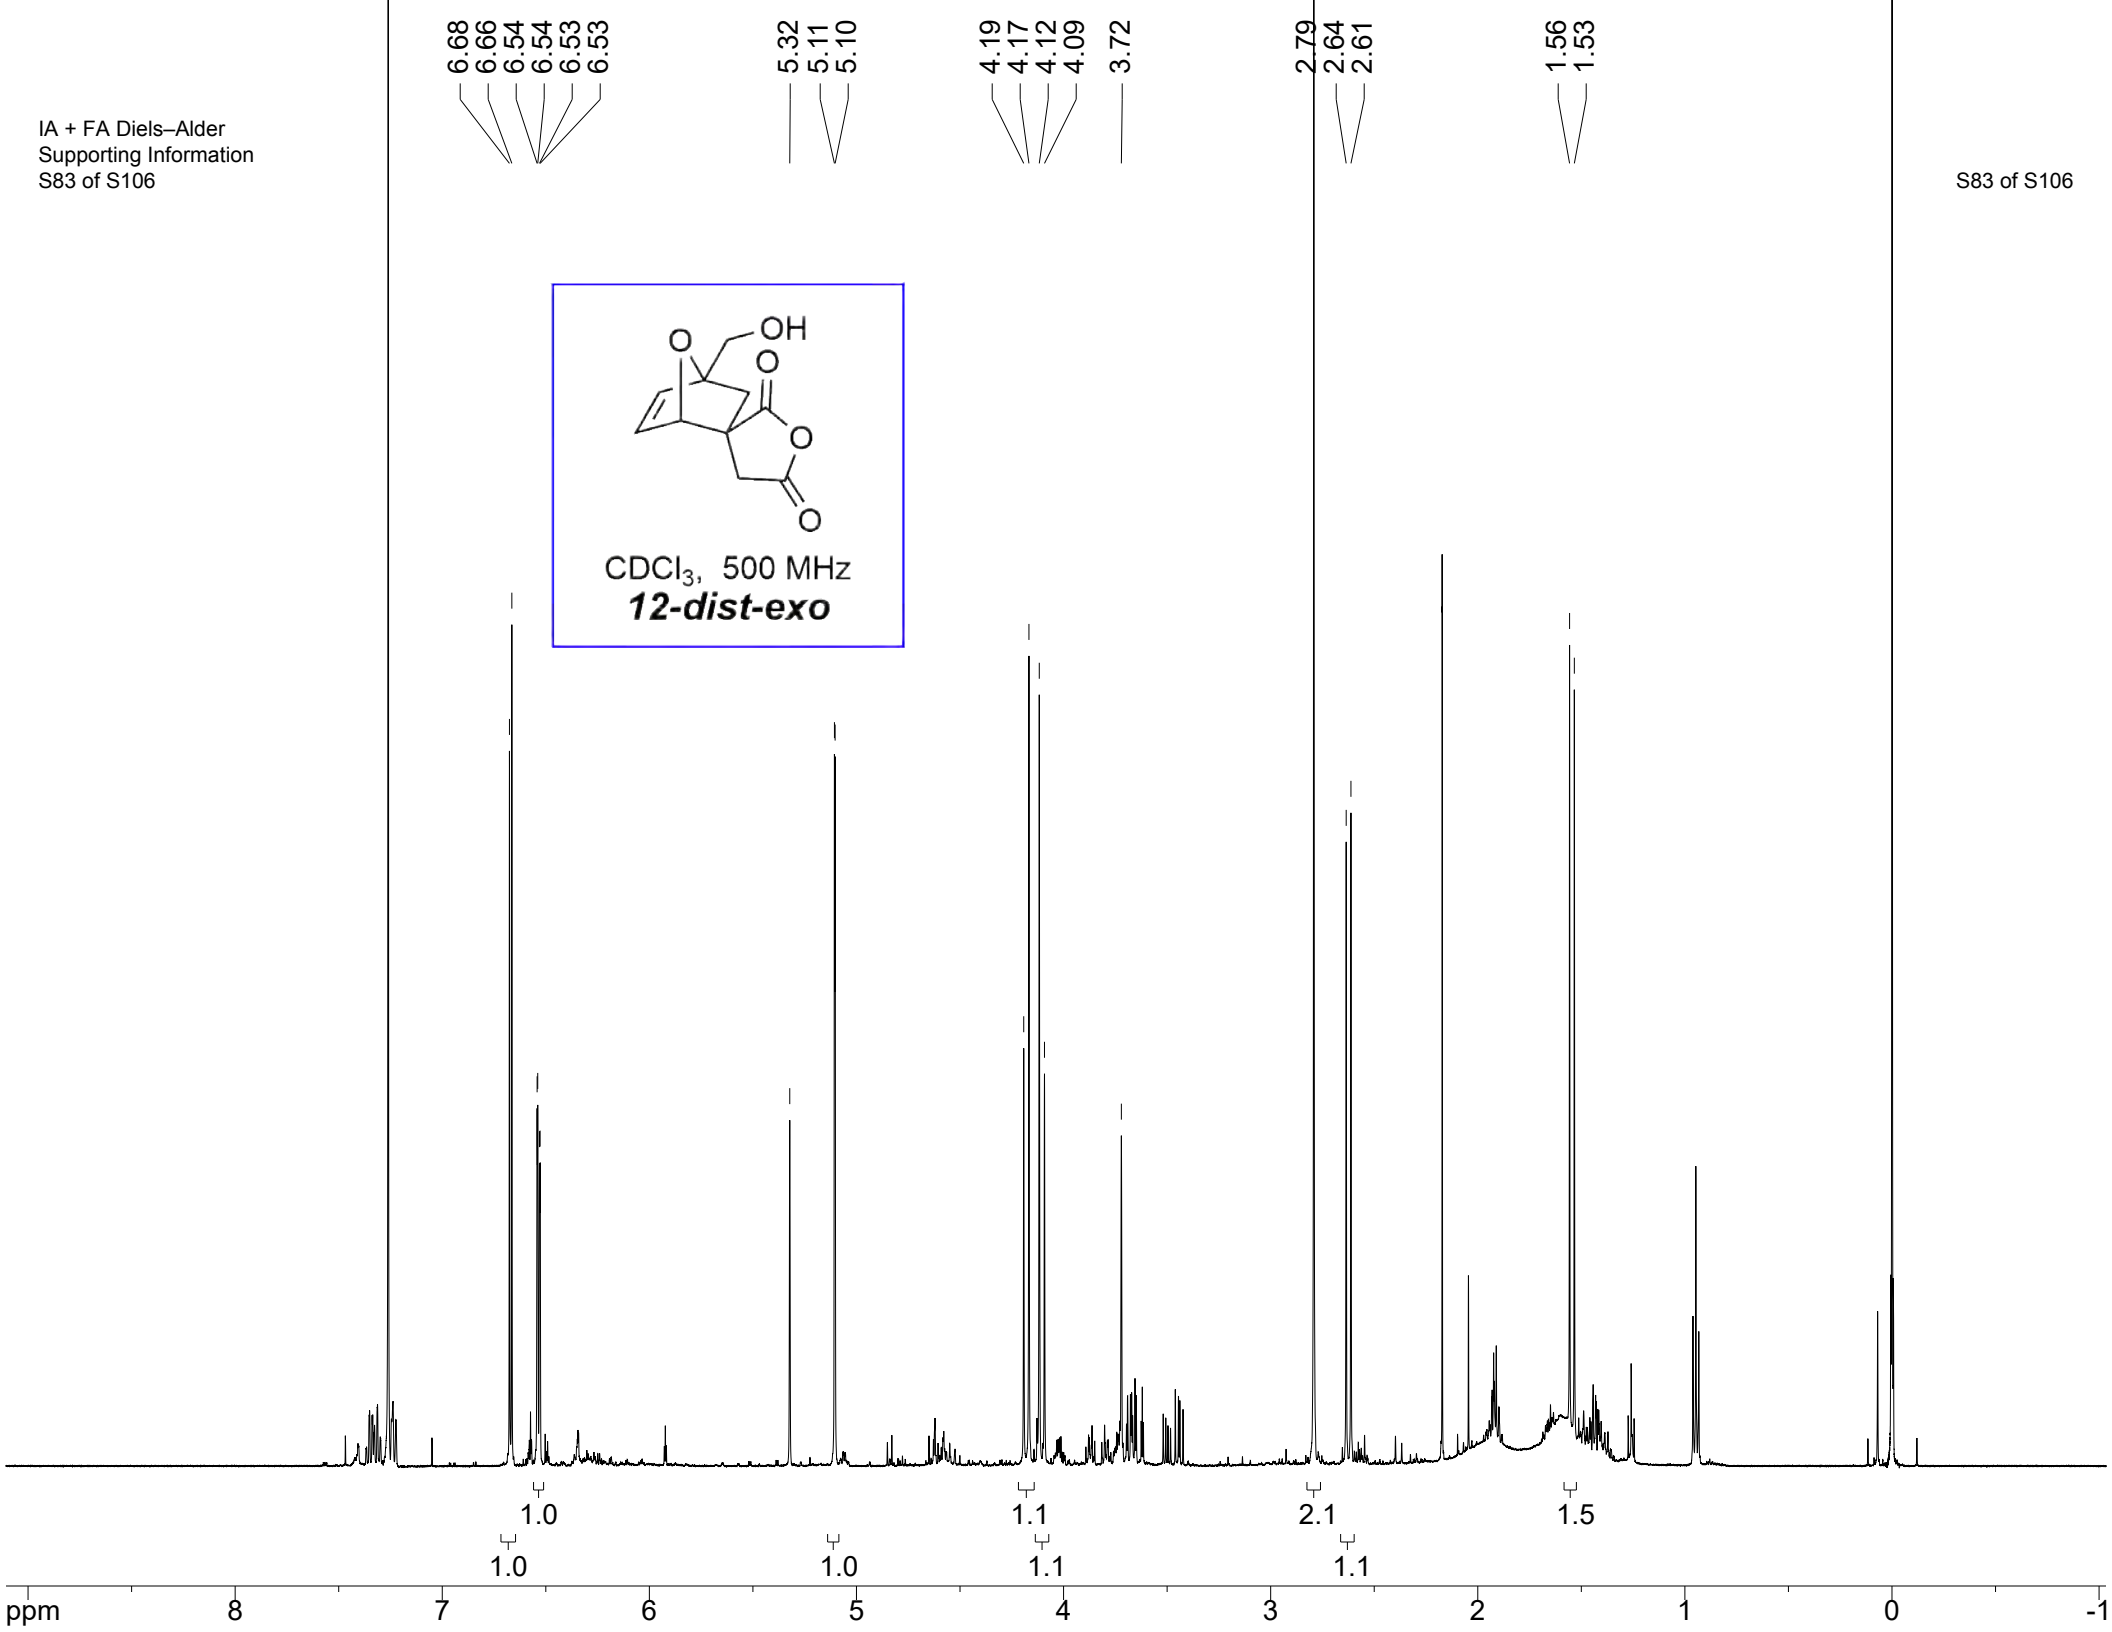

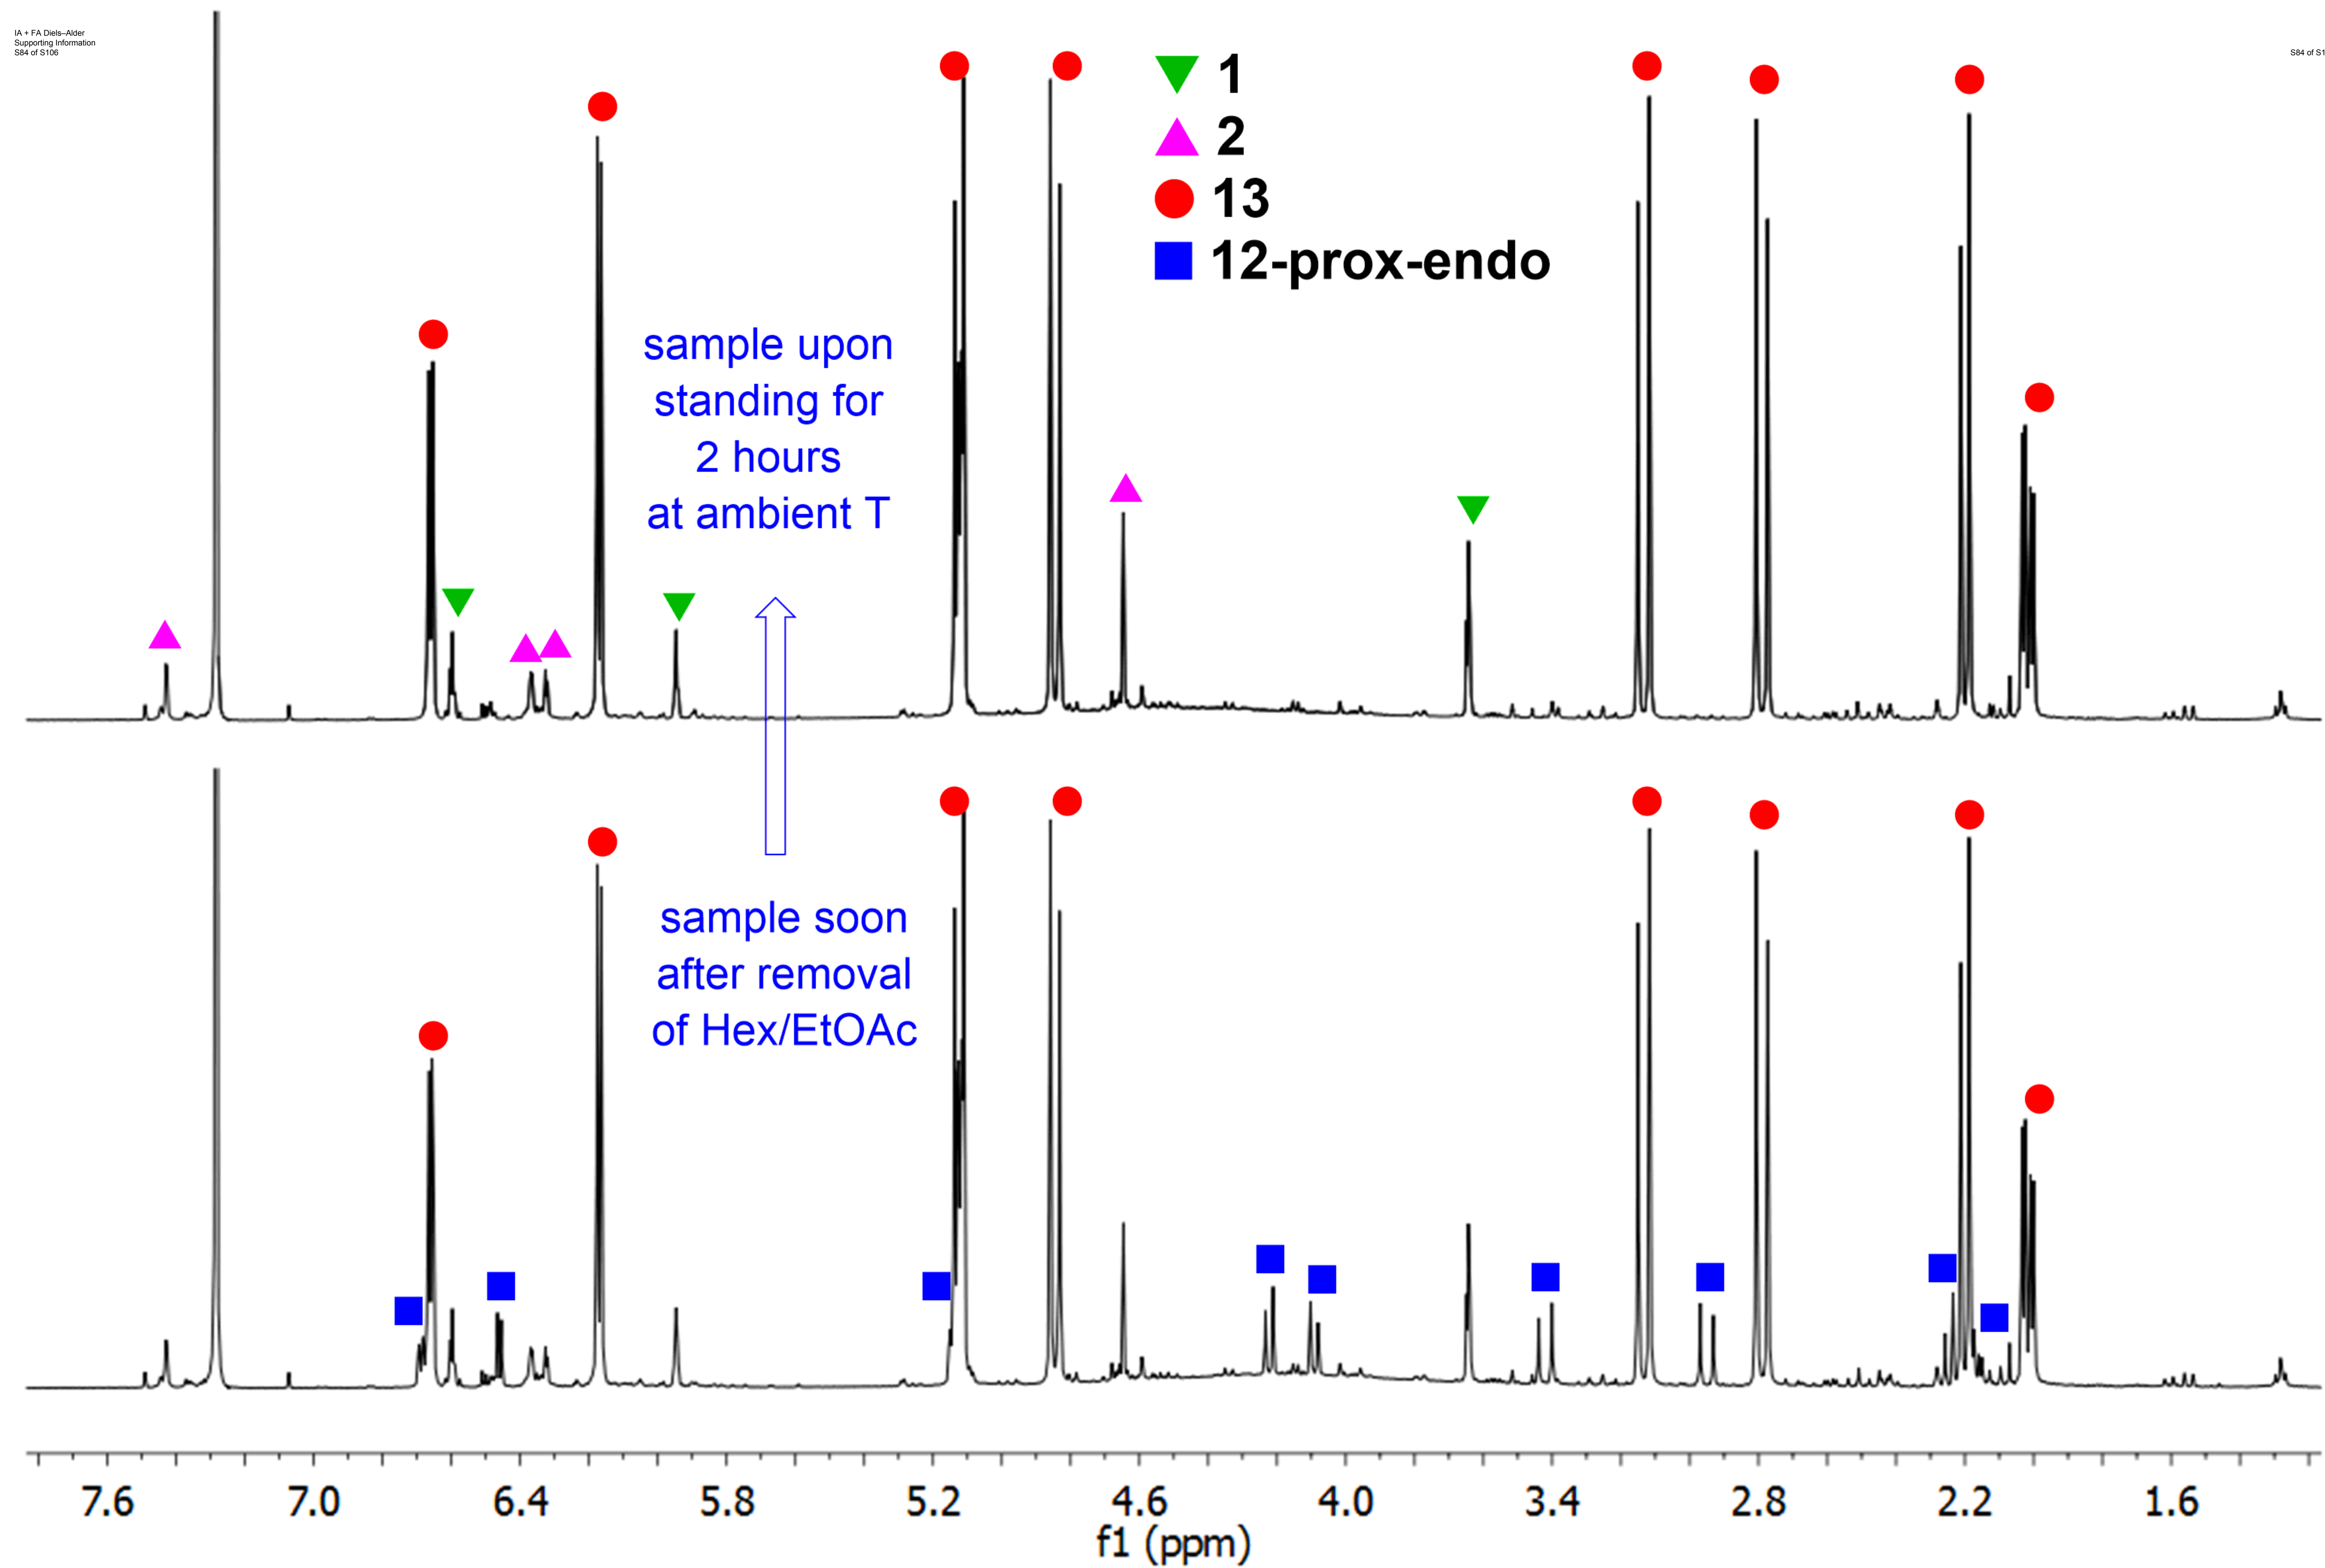



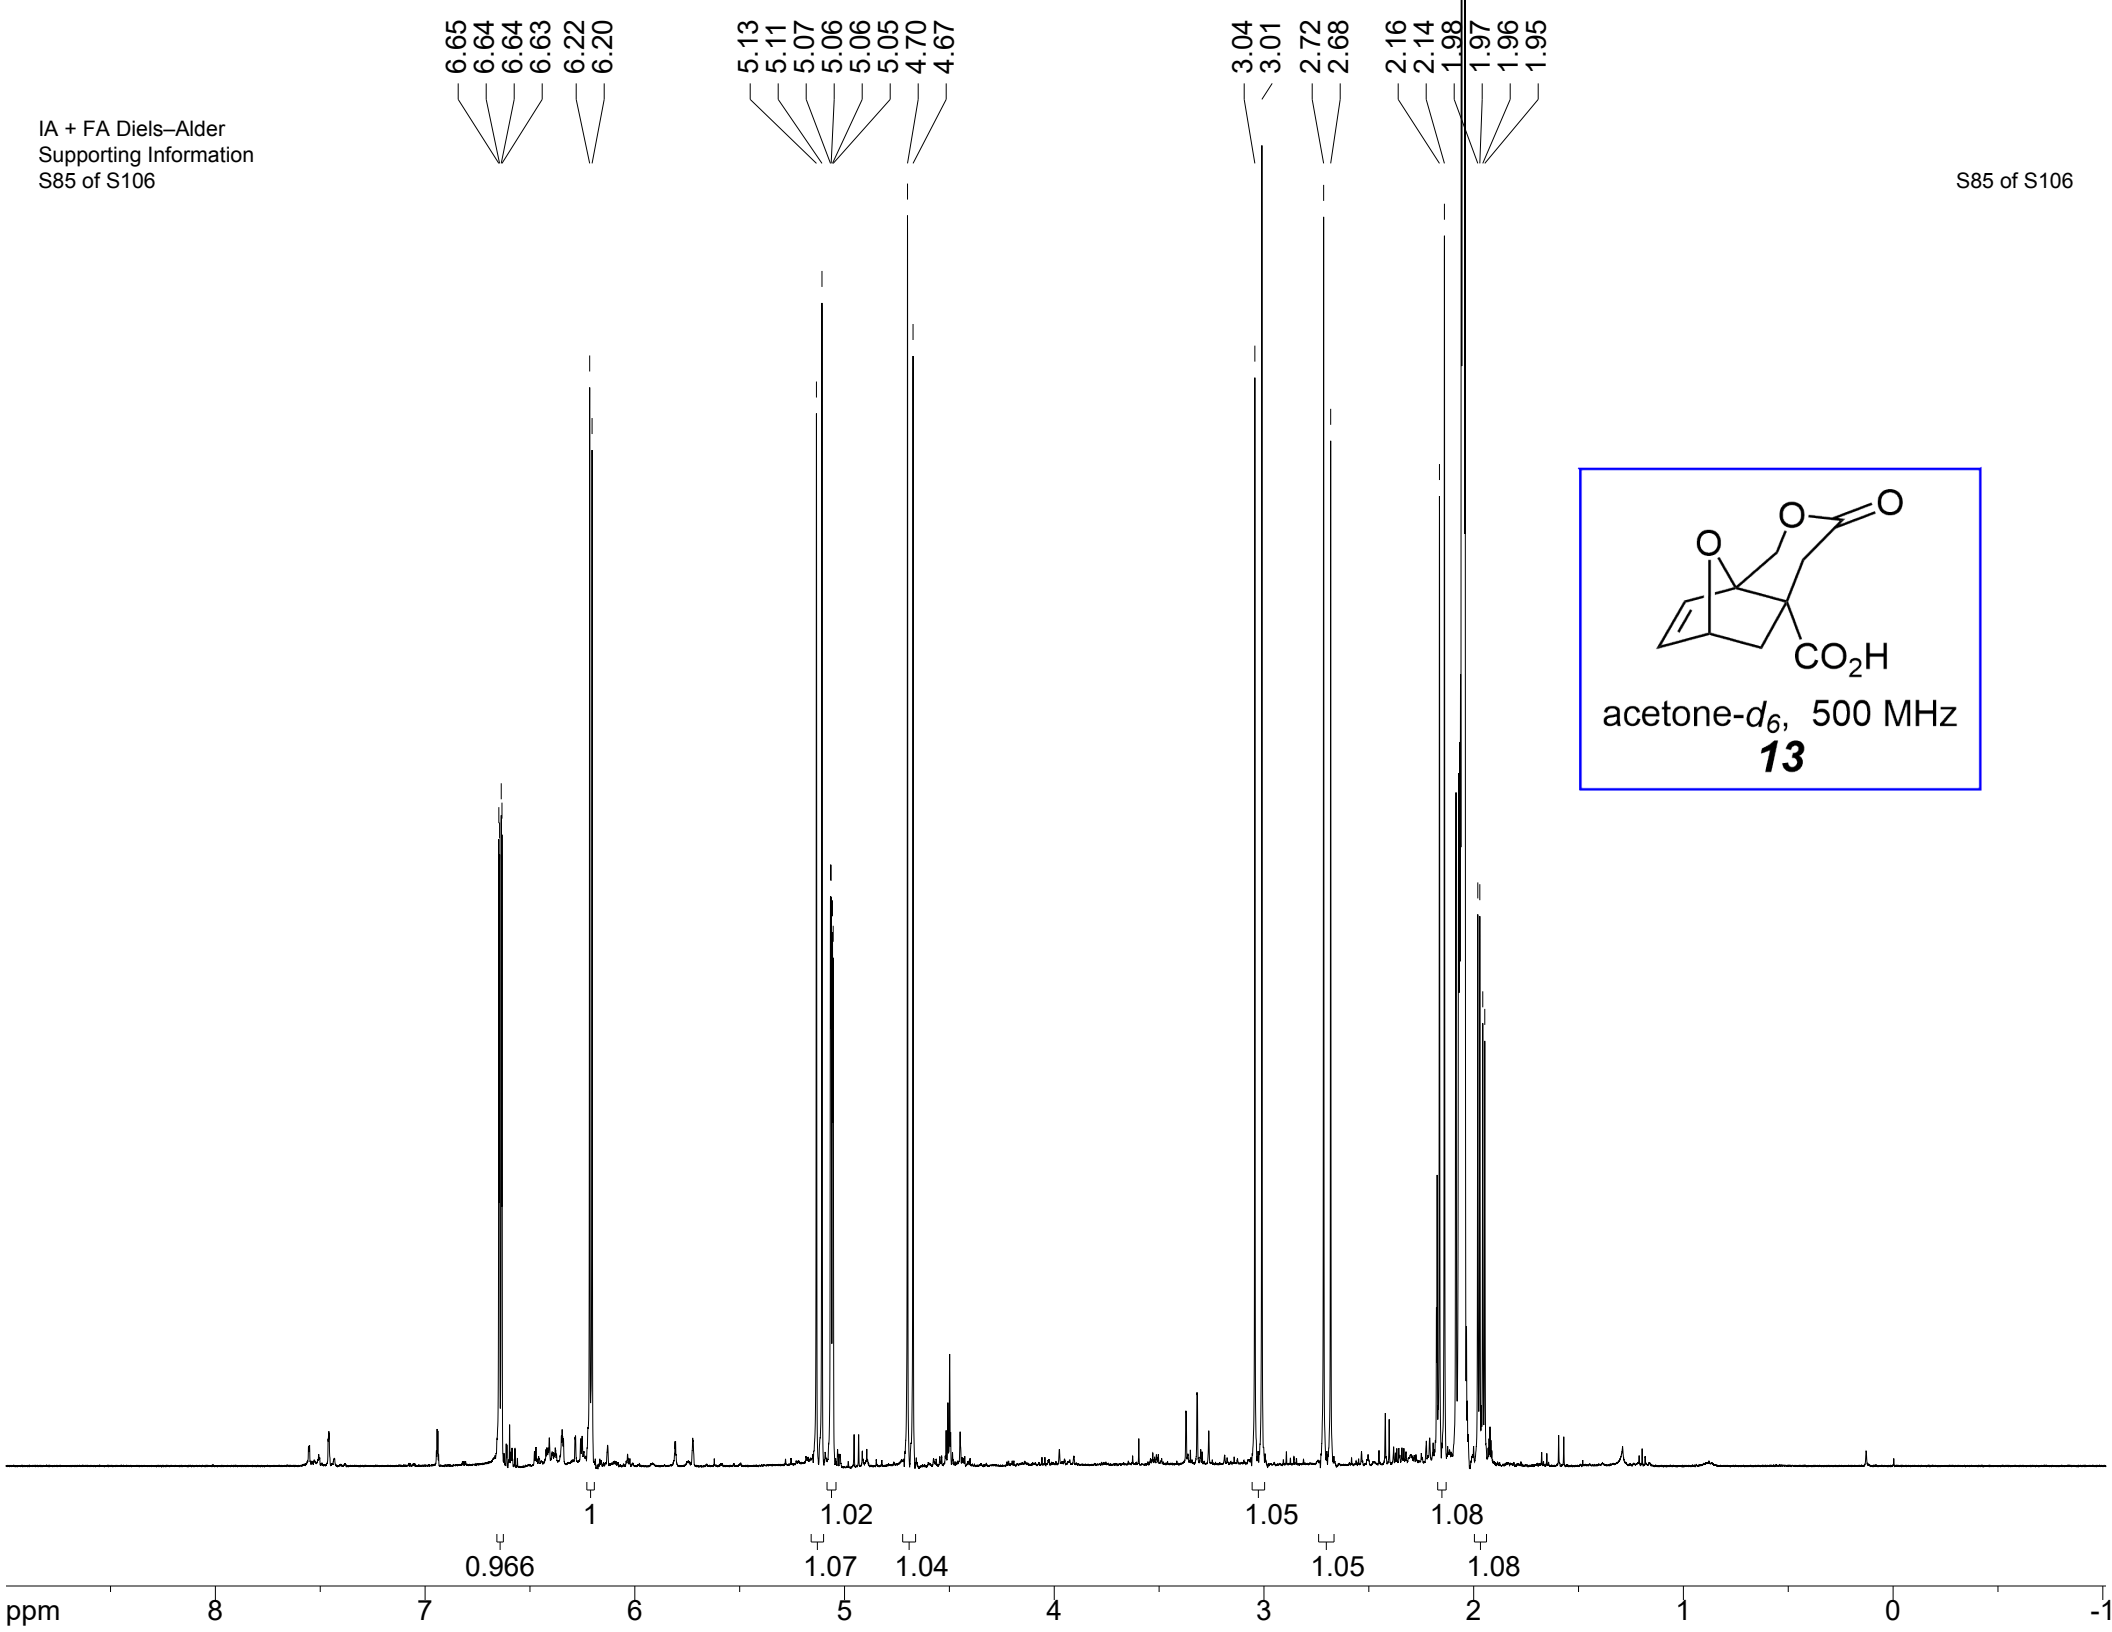



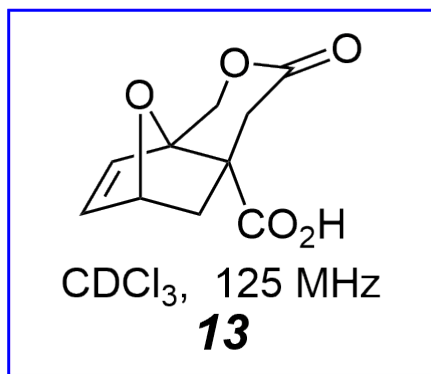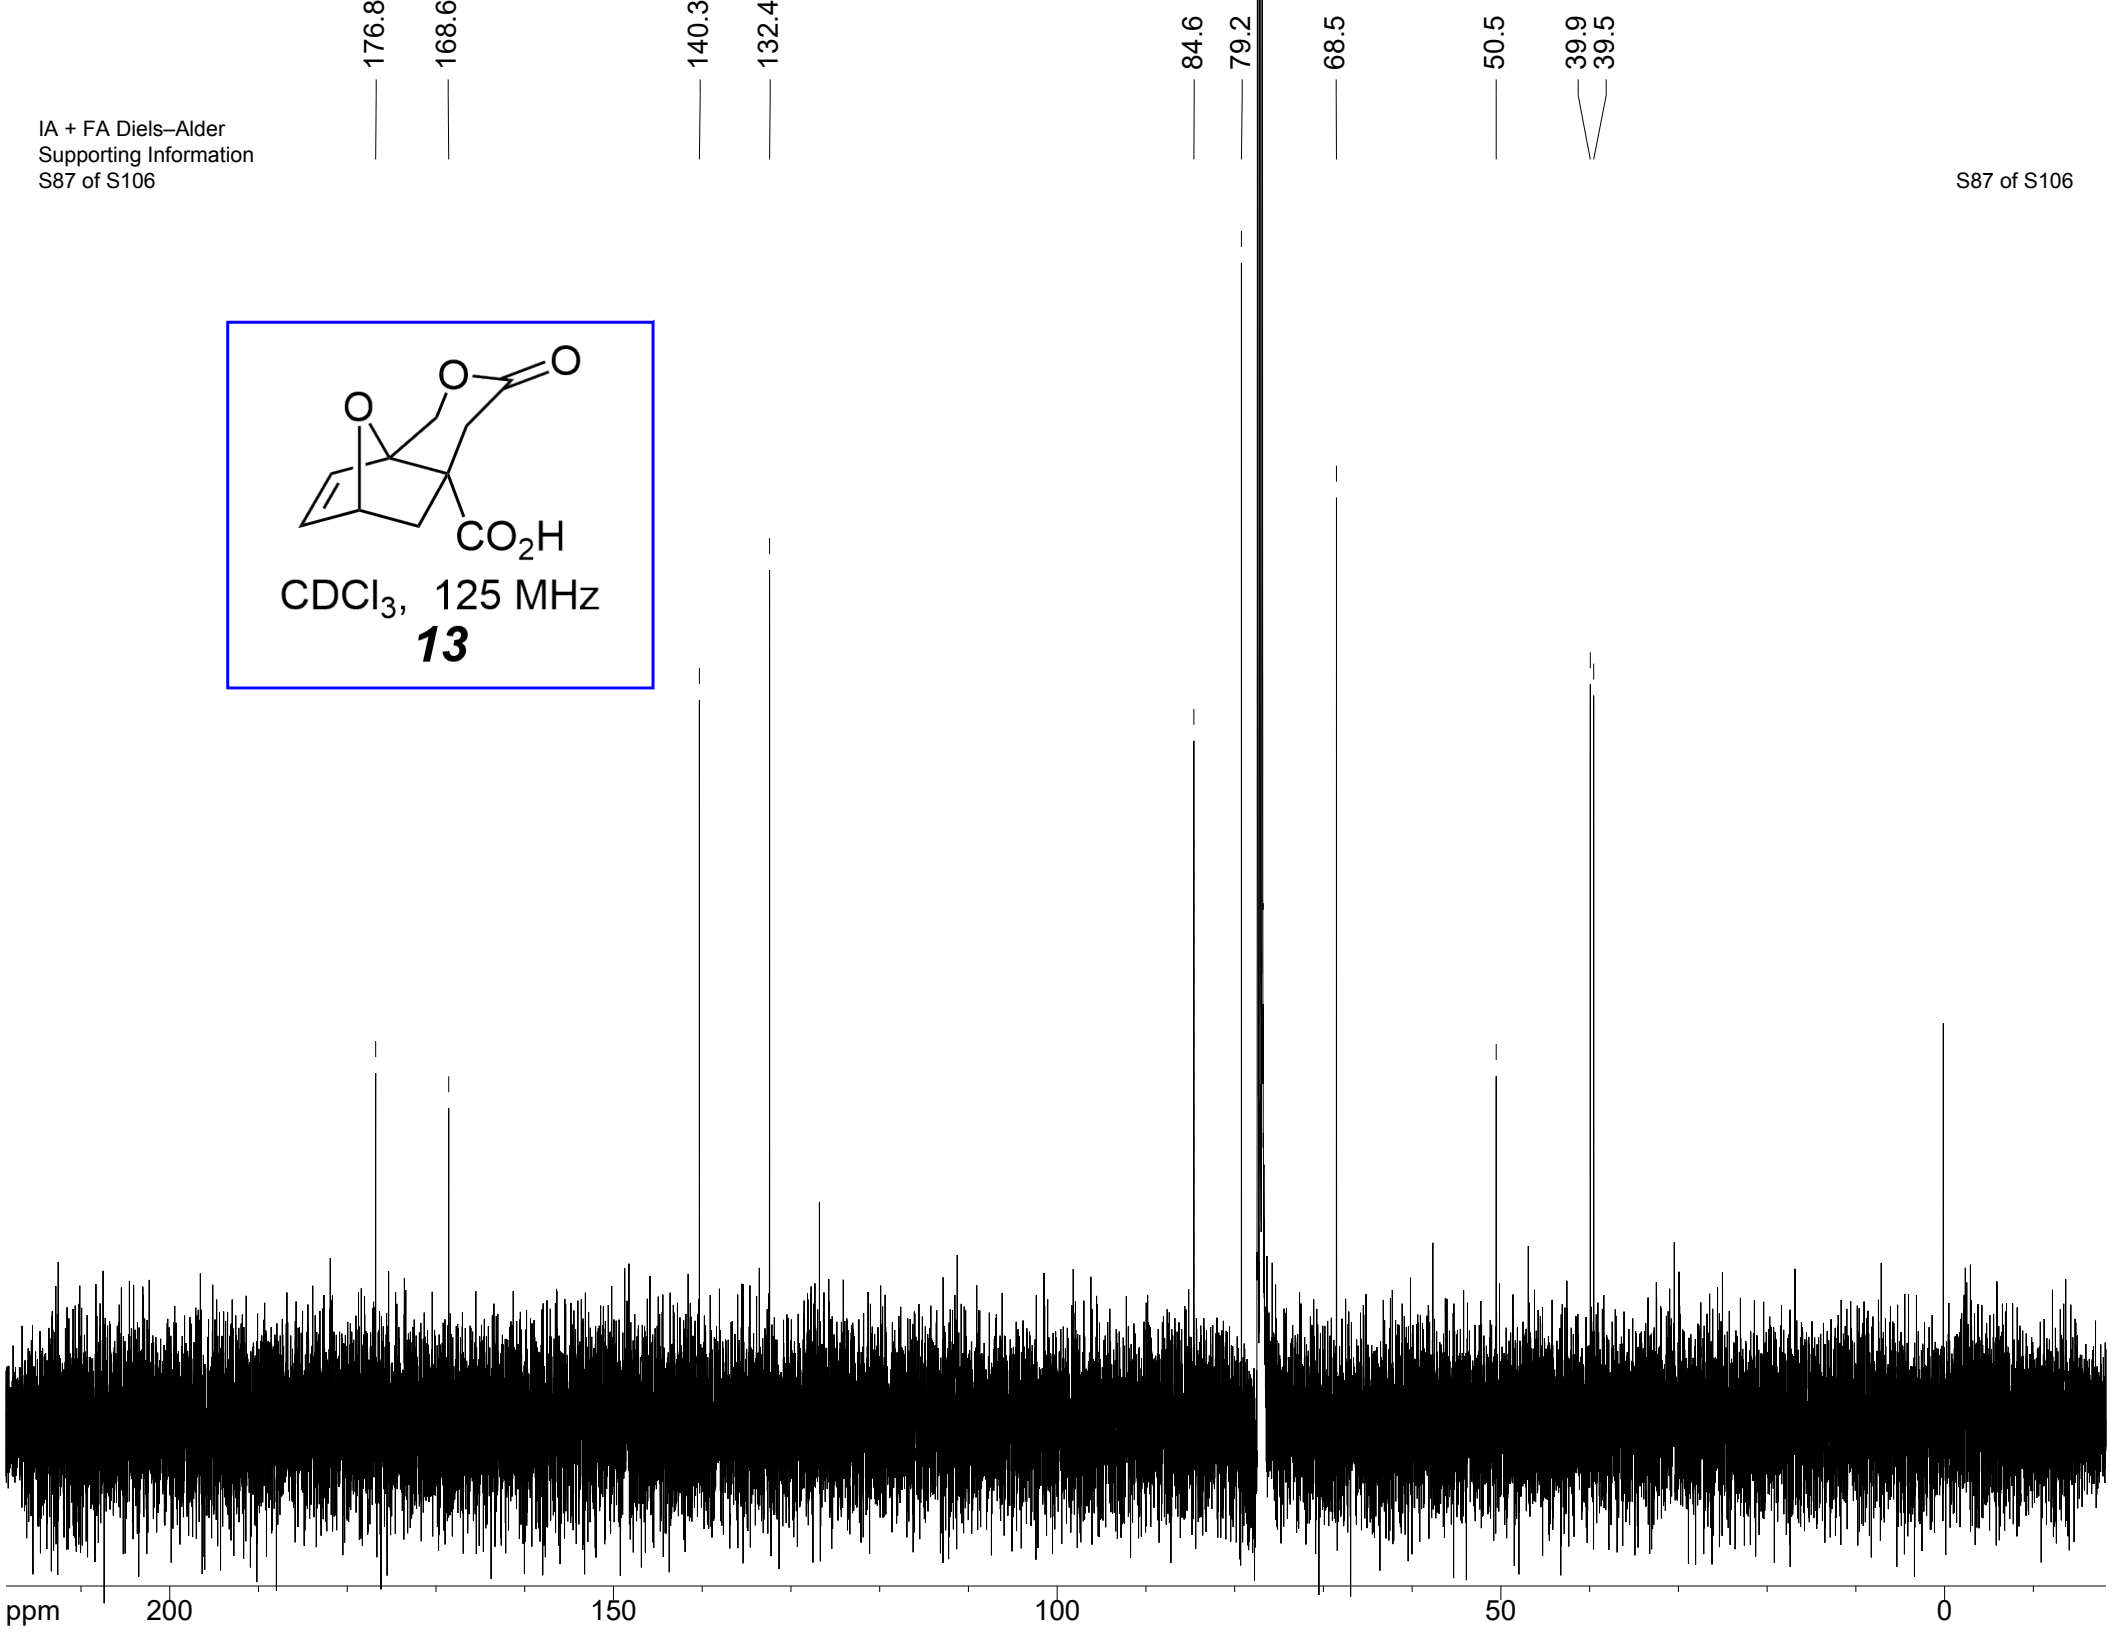

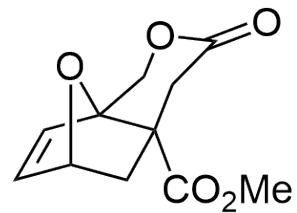

$\text{CDCl}_3$ , 500 MHz  
 **$^{13}\text{C}$**

6.62  
6.61  
6.60  
6.60  
6.07  
6.05  
5.09  
5.08  
5.07  
5.06  
4.83  
4.79

3.71

3.07  
3.03  
2.76  
2.72  
2.22  
2.19  
1.99  
1.98  
1.96  
1.95

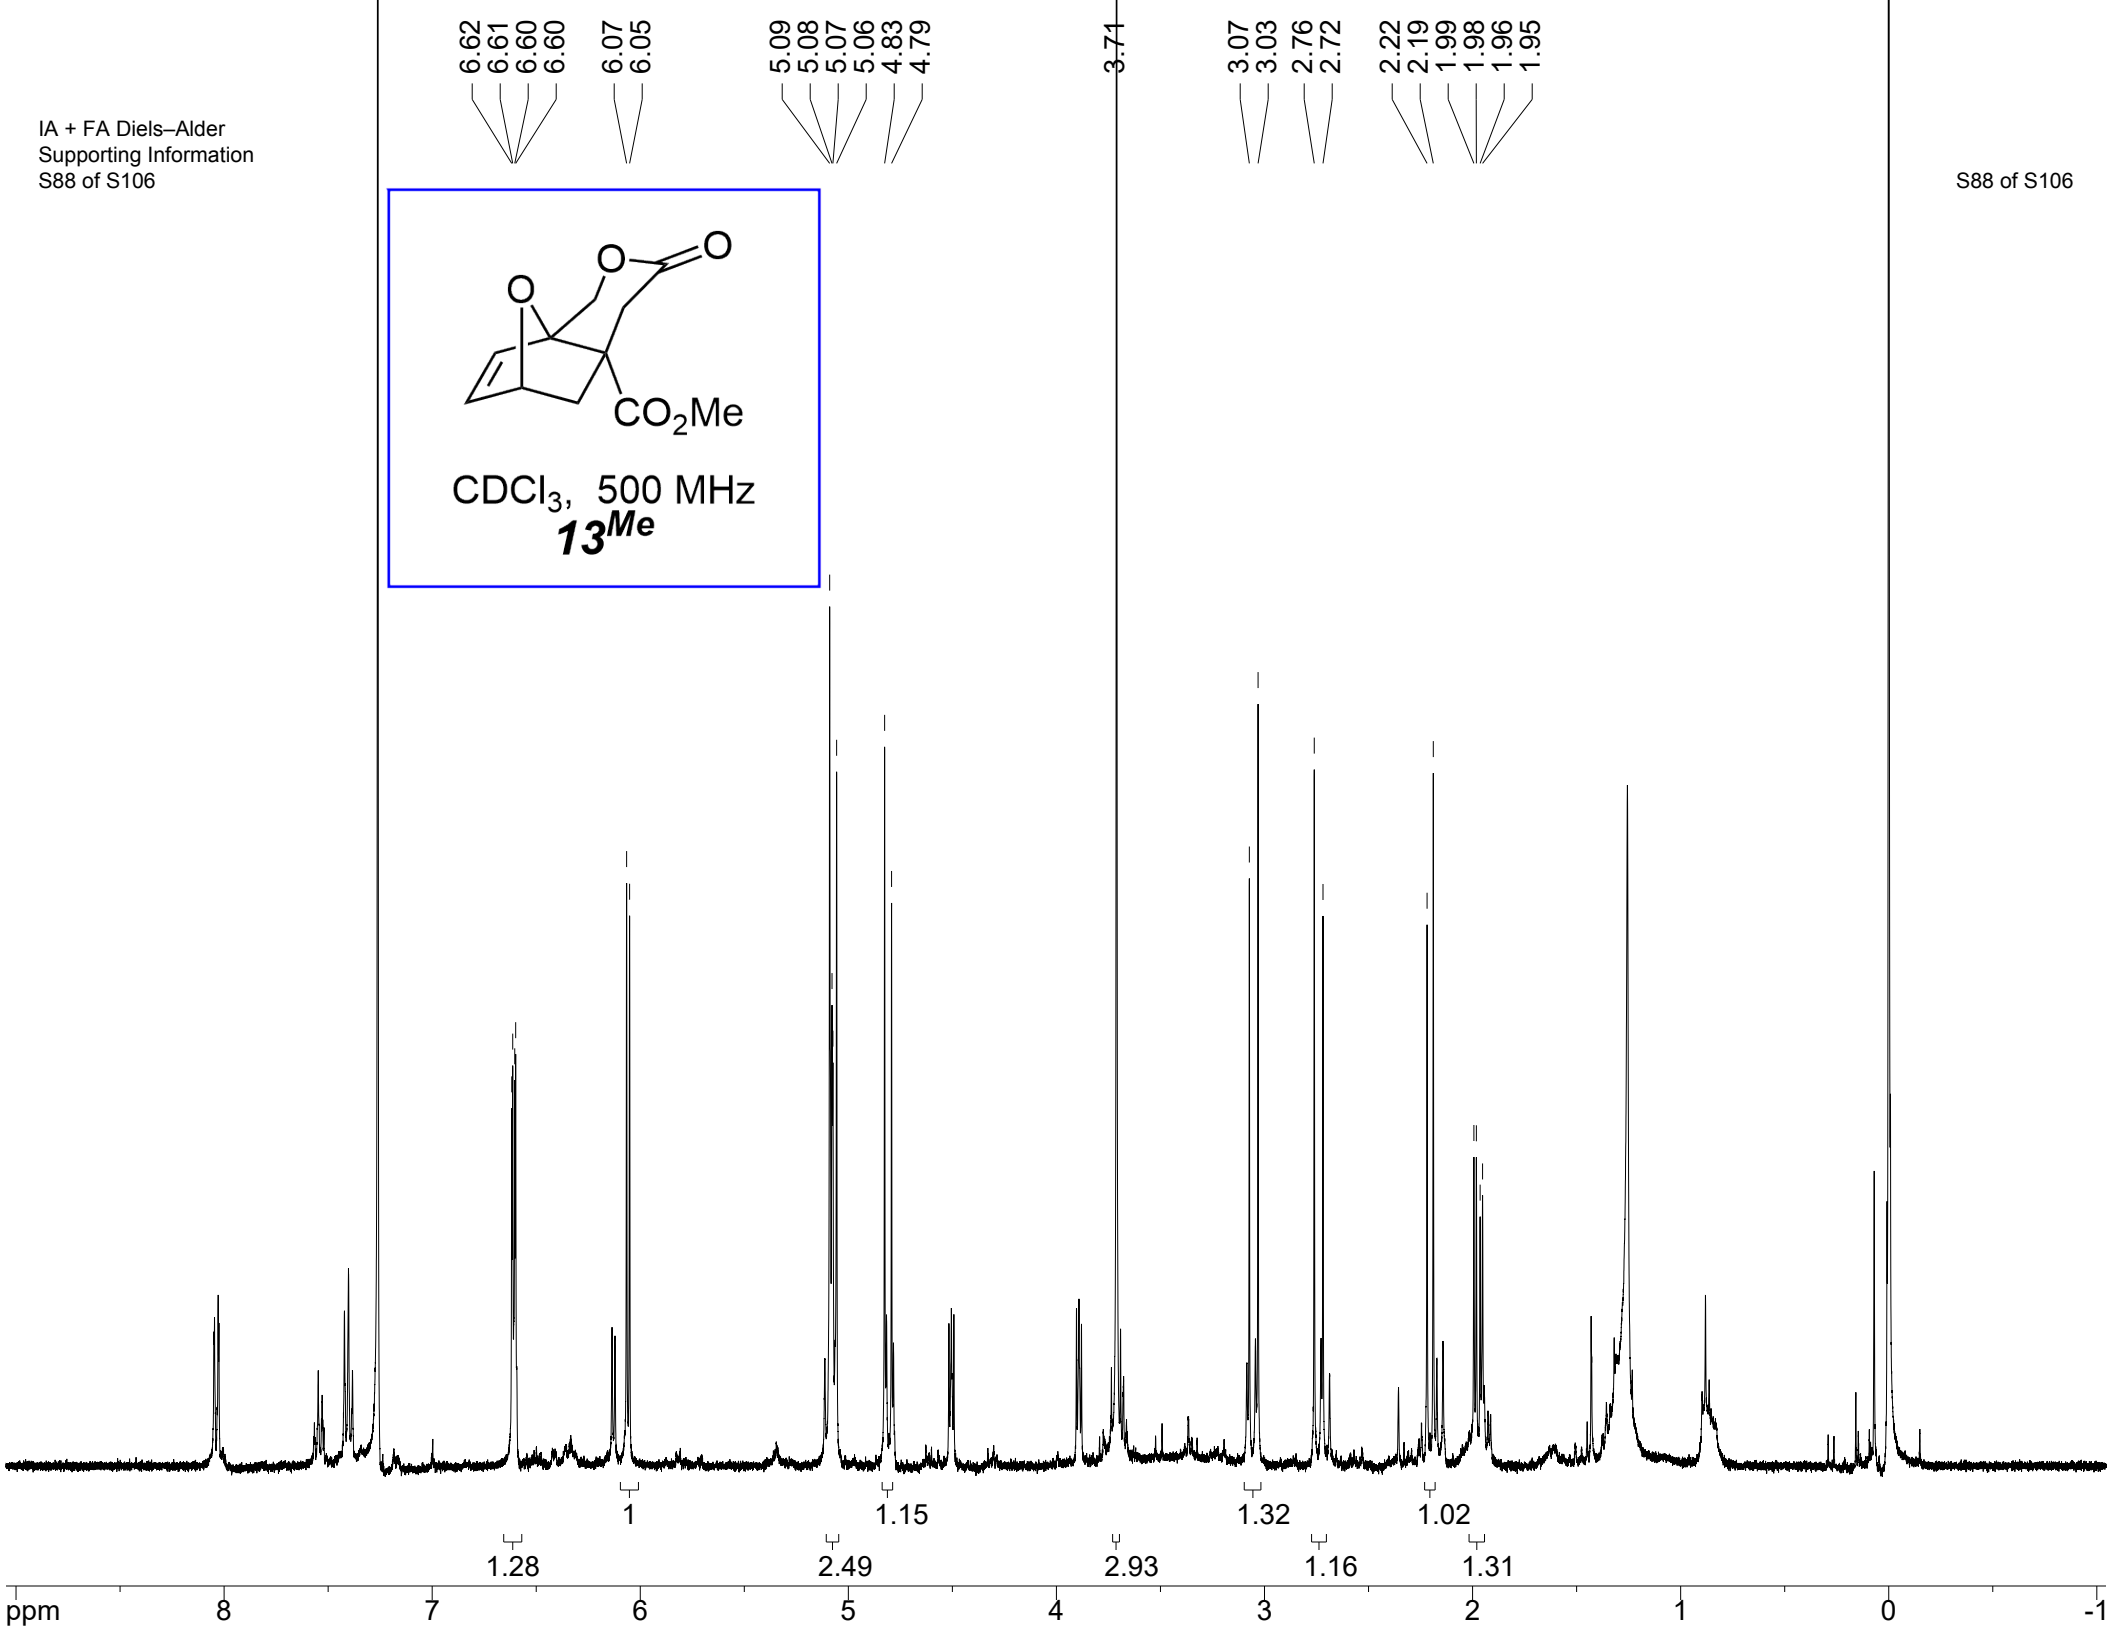

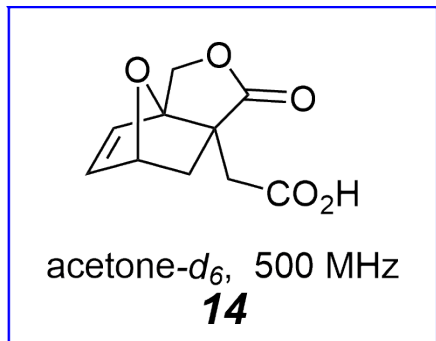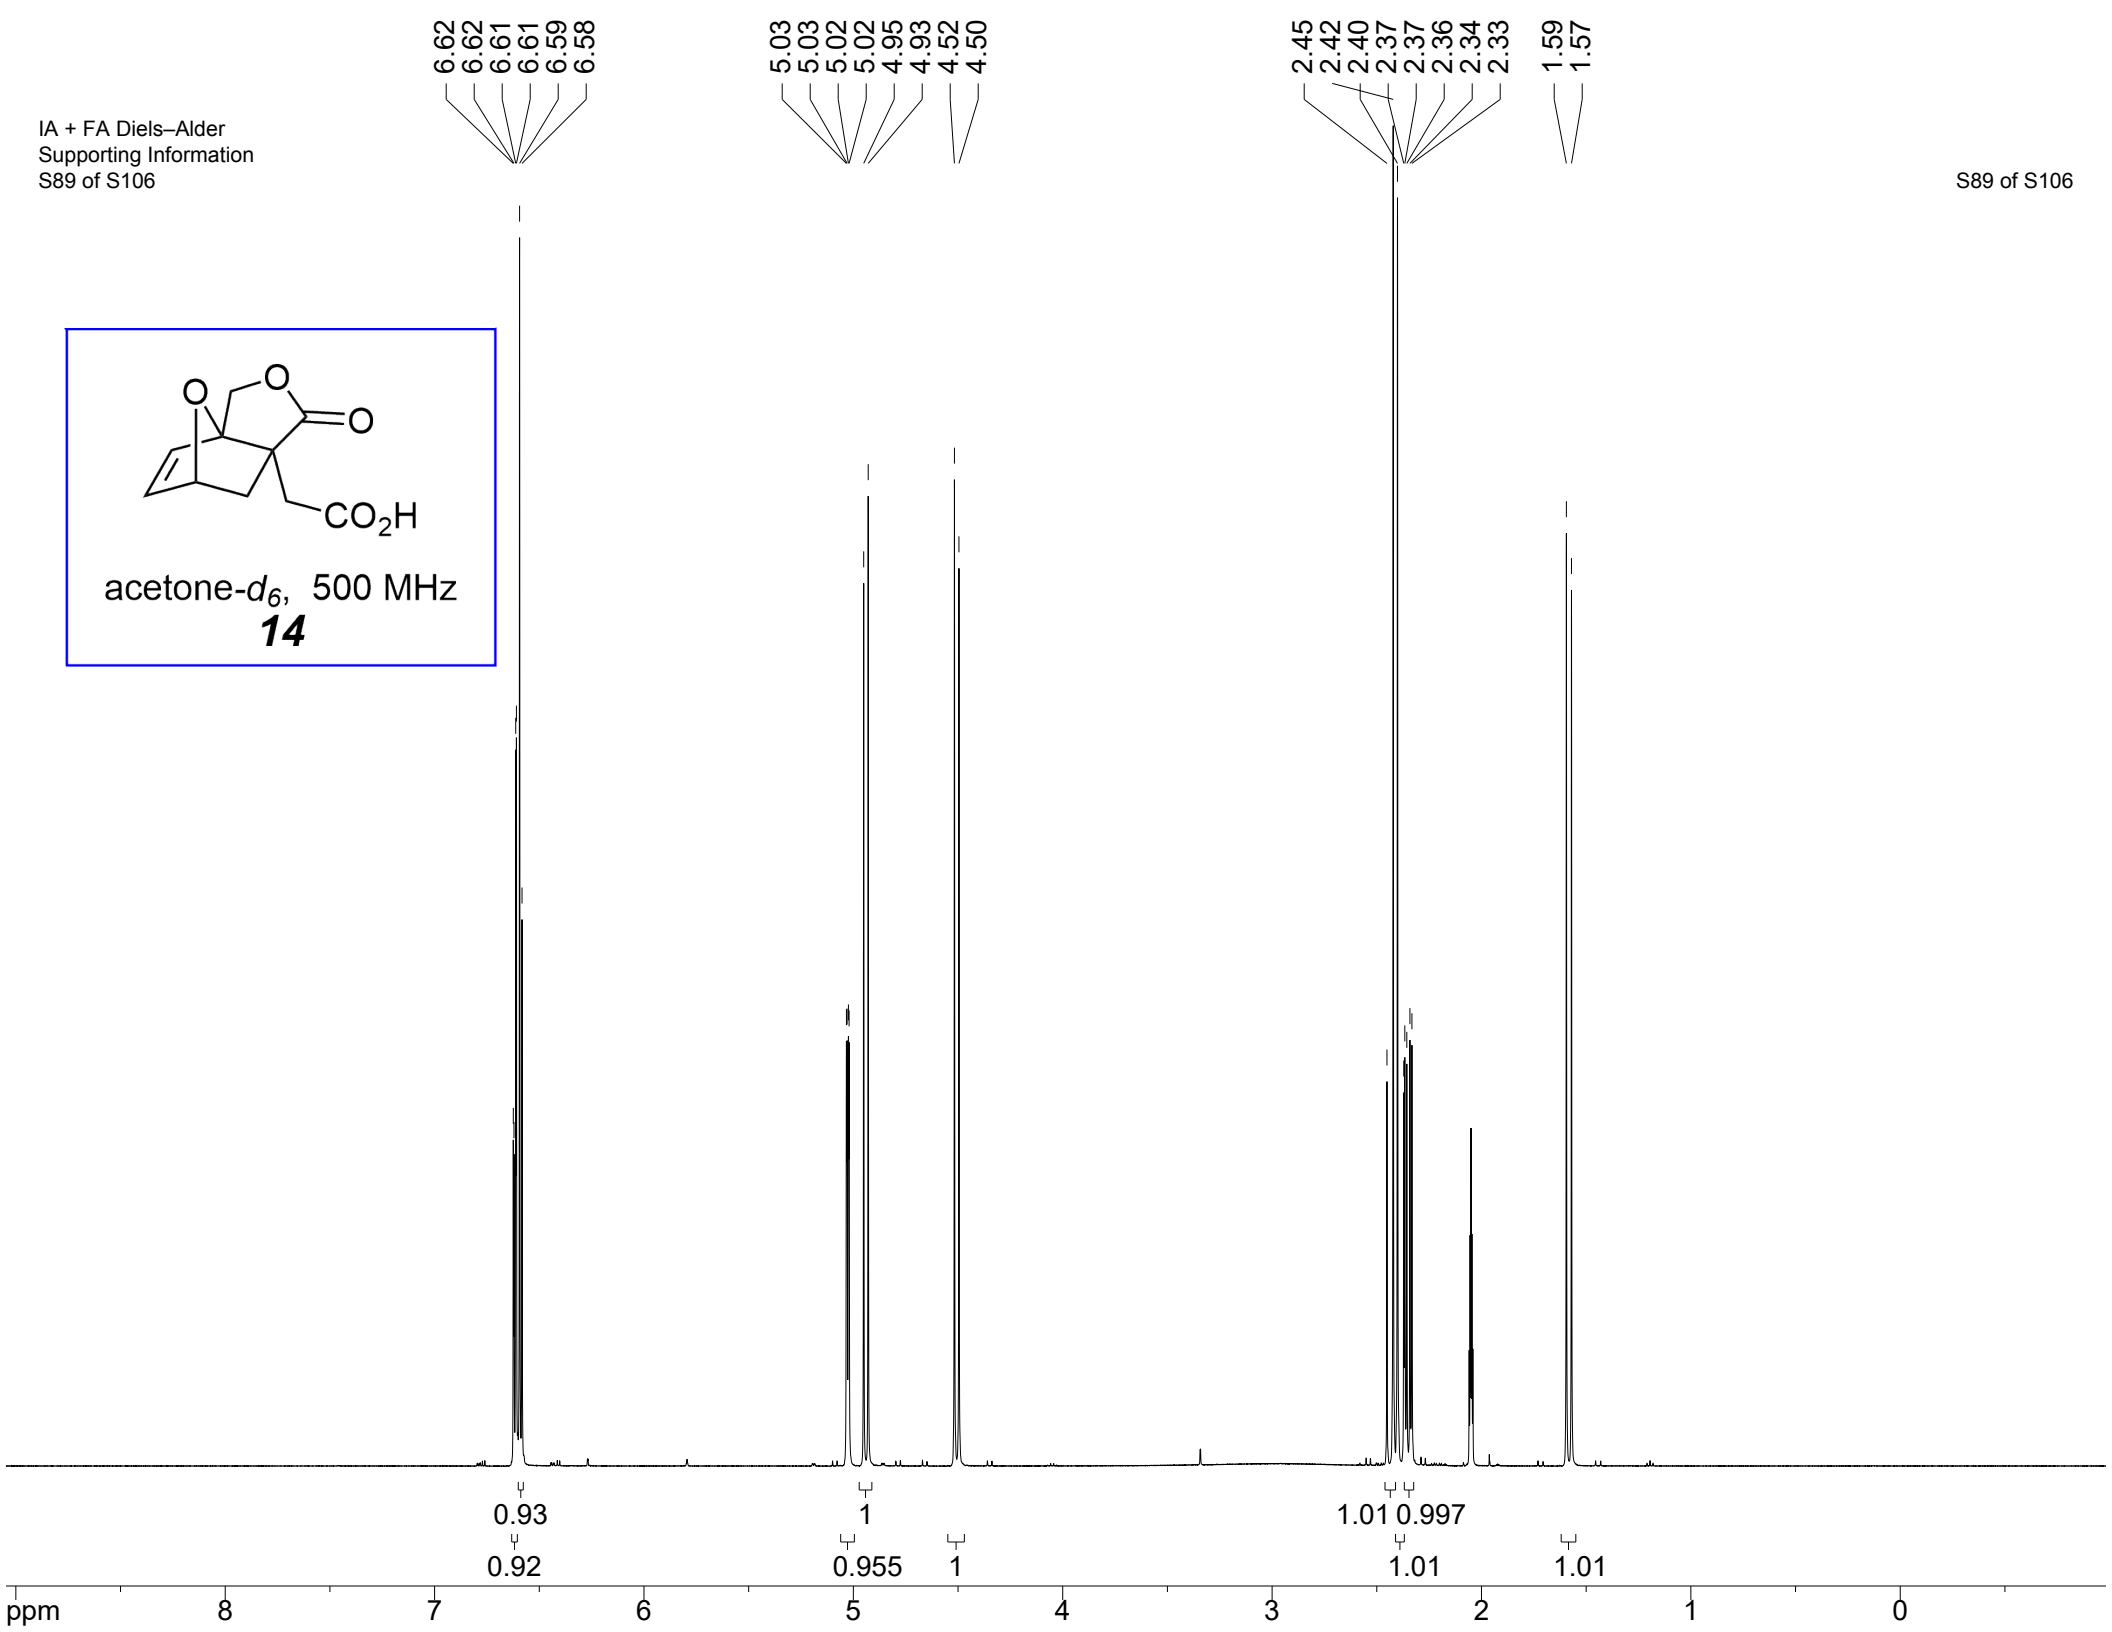

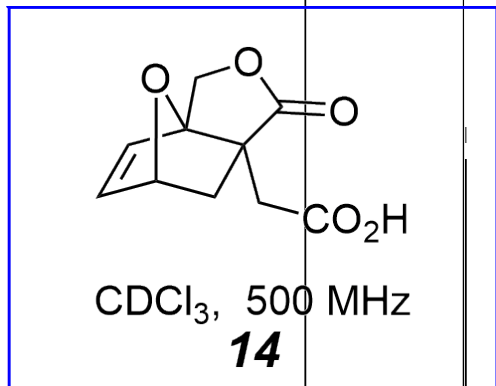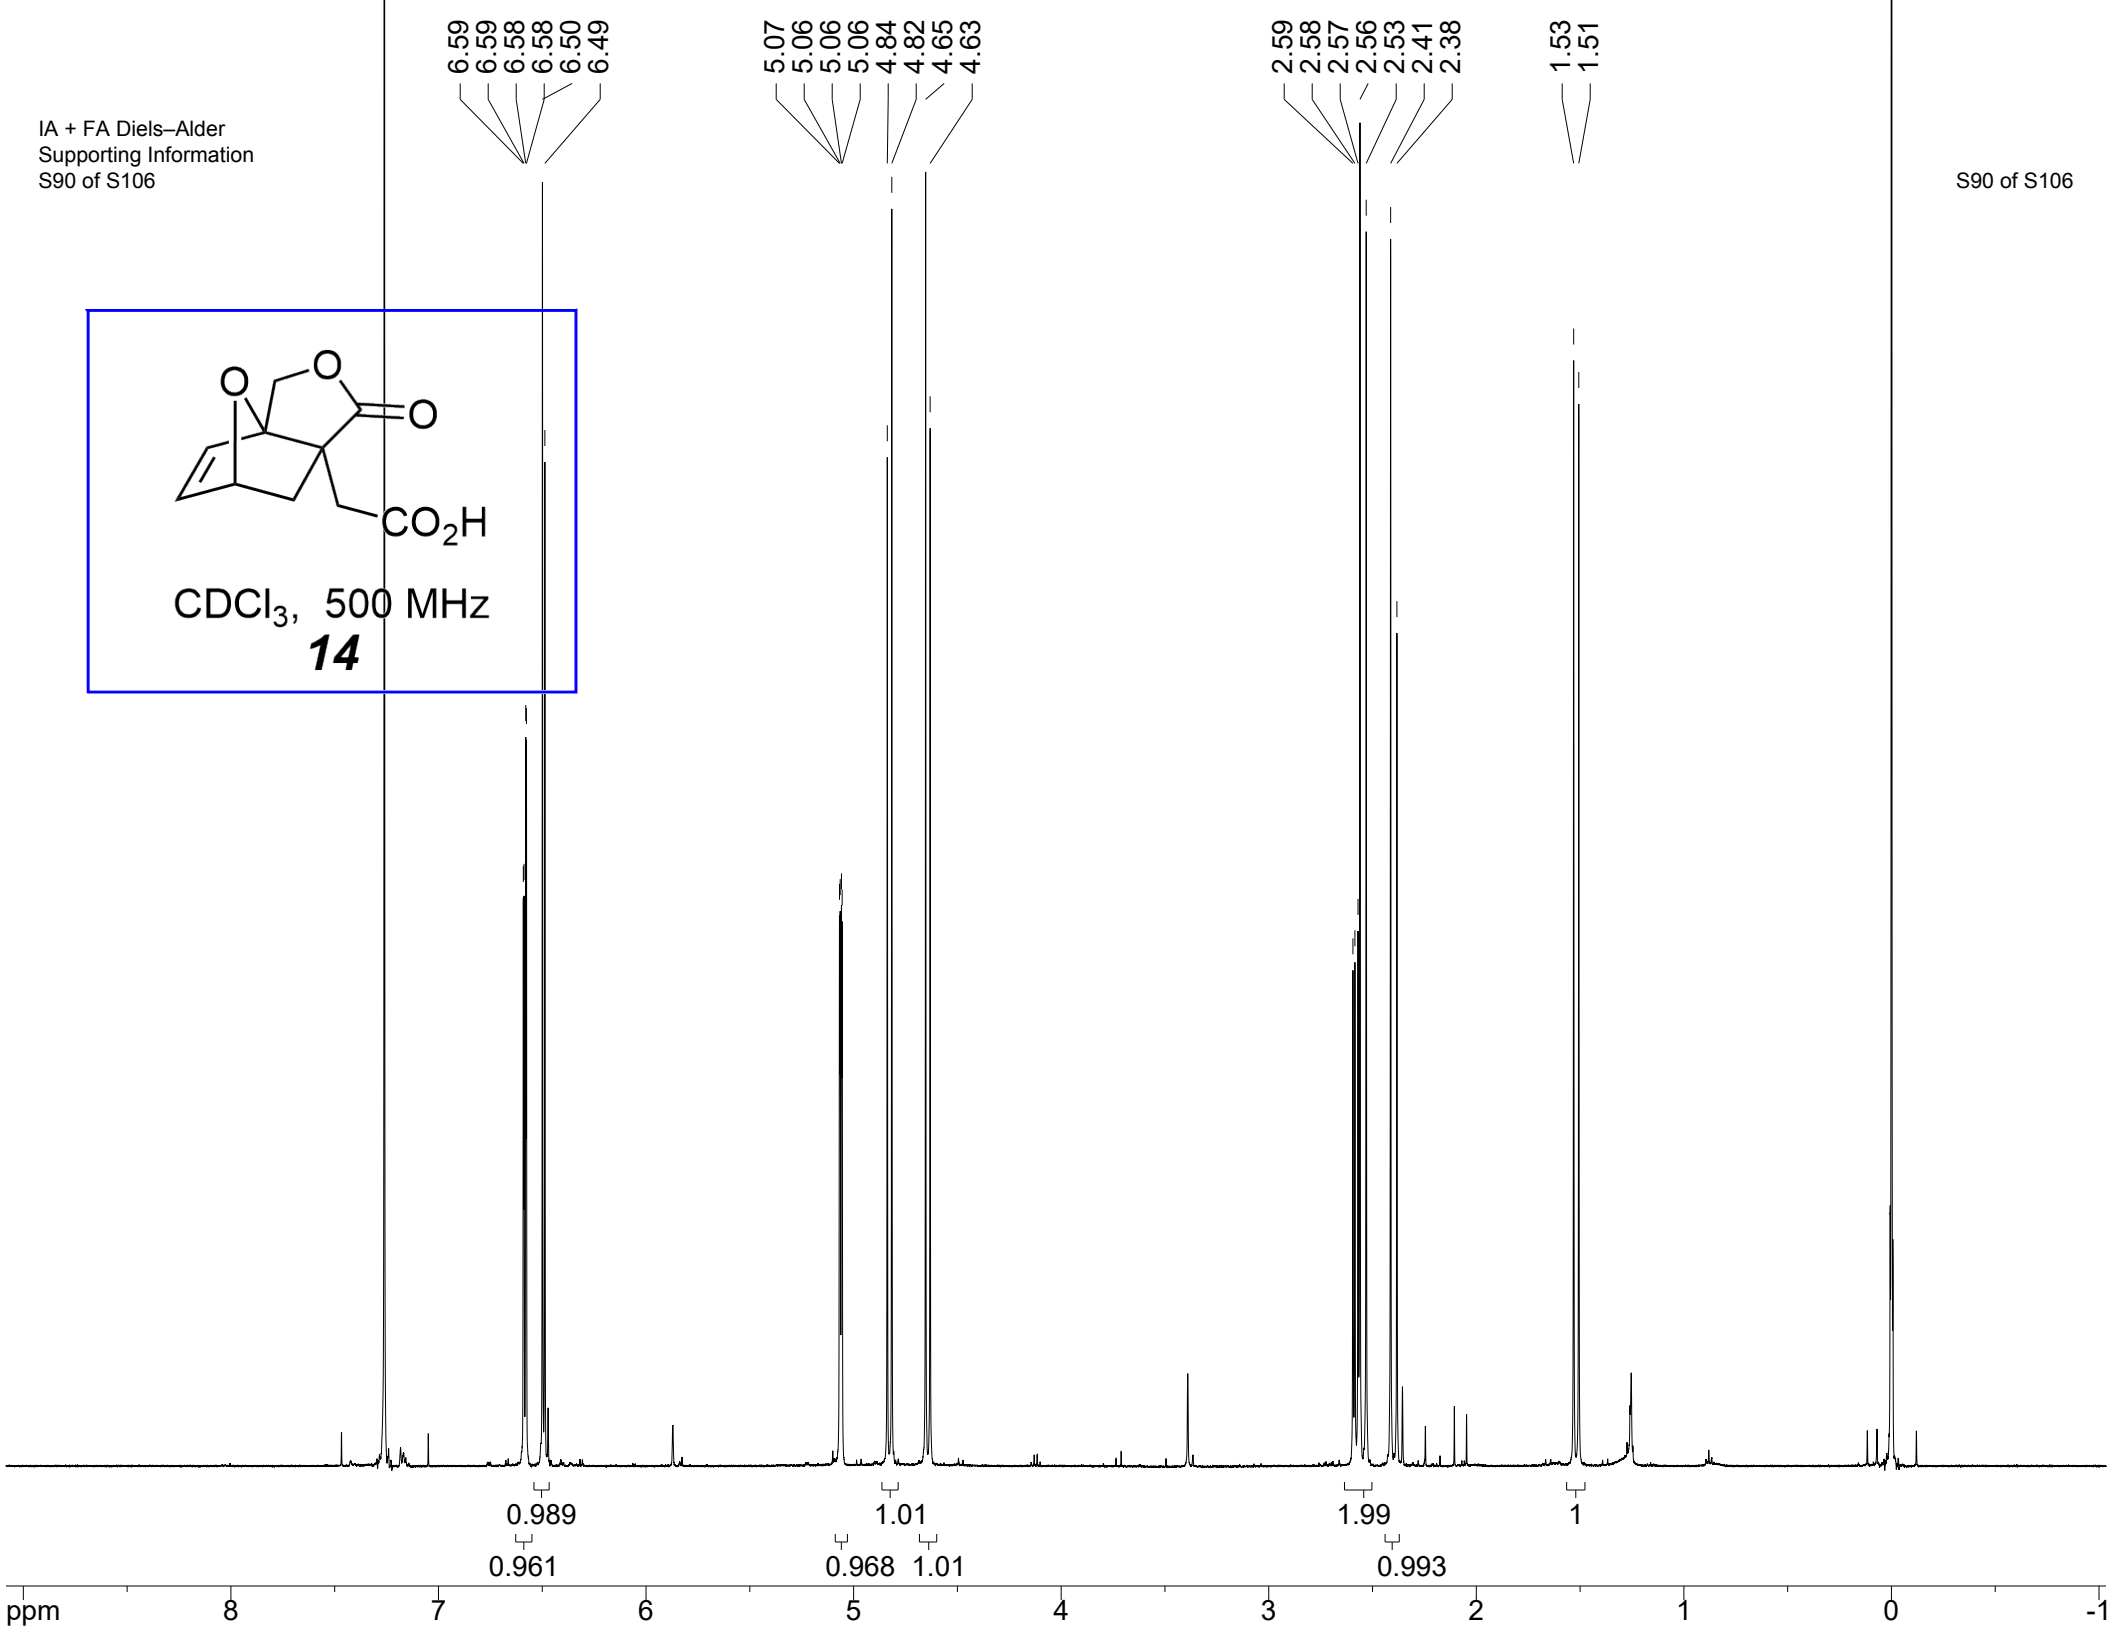

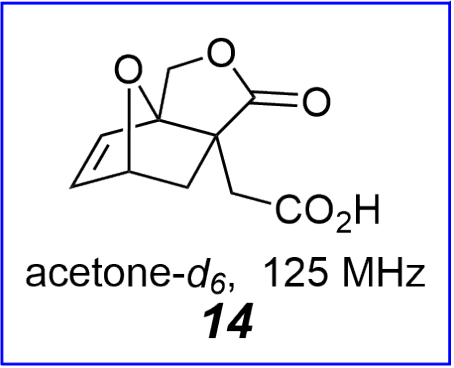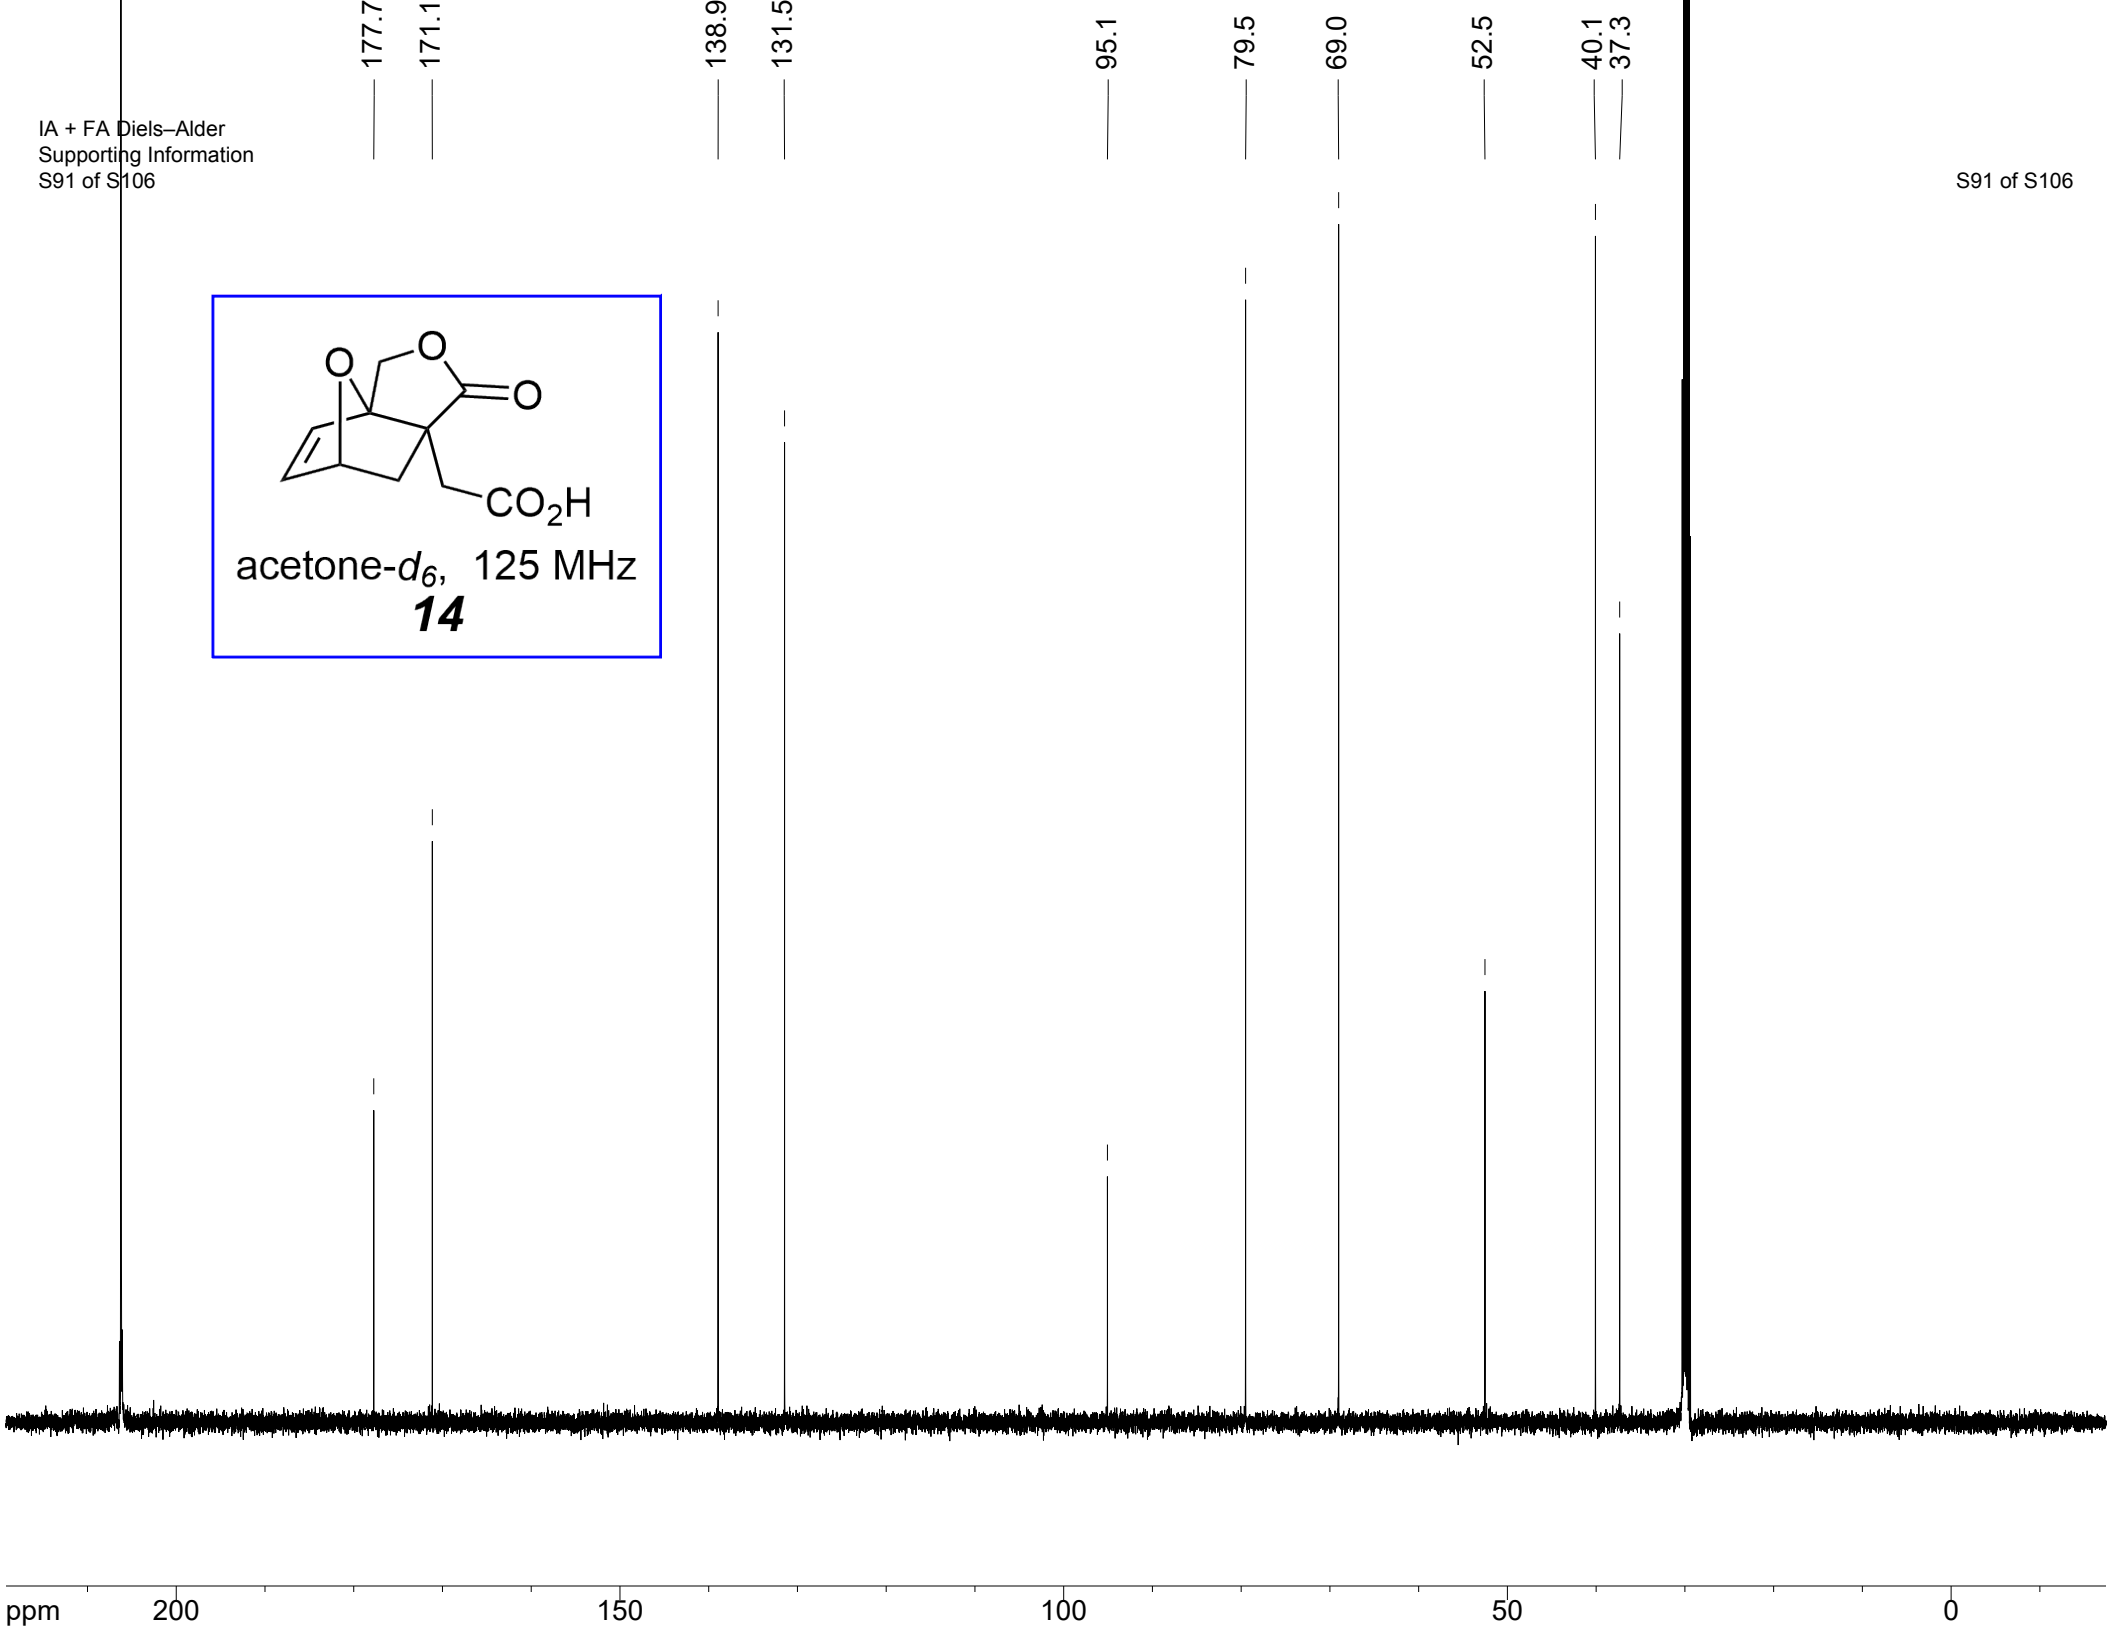

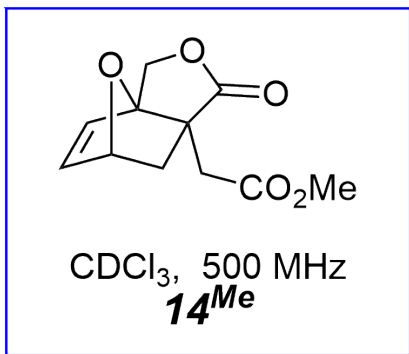

6.57  
6.55  
6.50  
6.49

5.05  
5.04  
4.81  
4.78  
4.62  
4.60

2.56  
2.55  
2.53  
2.34  
2.31

1.51  
1.49

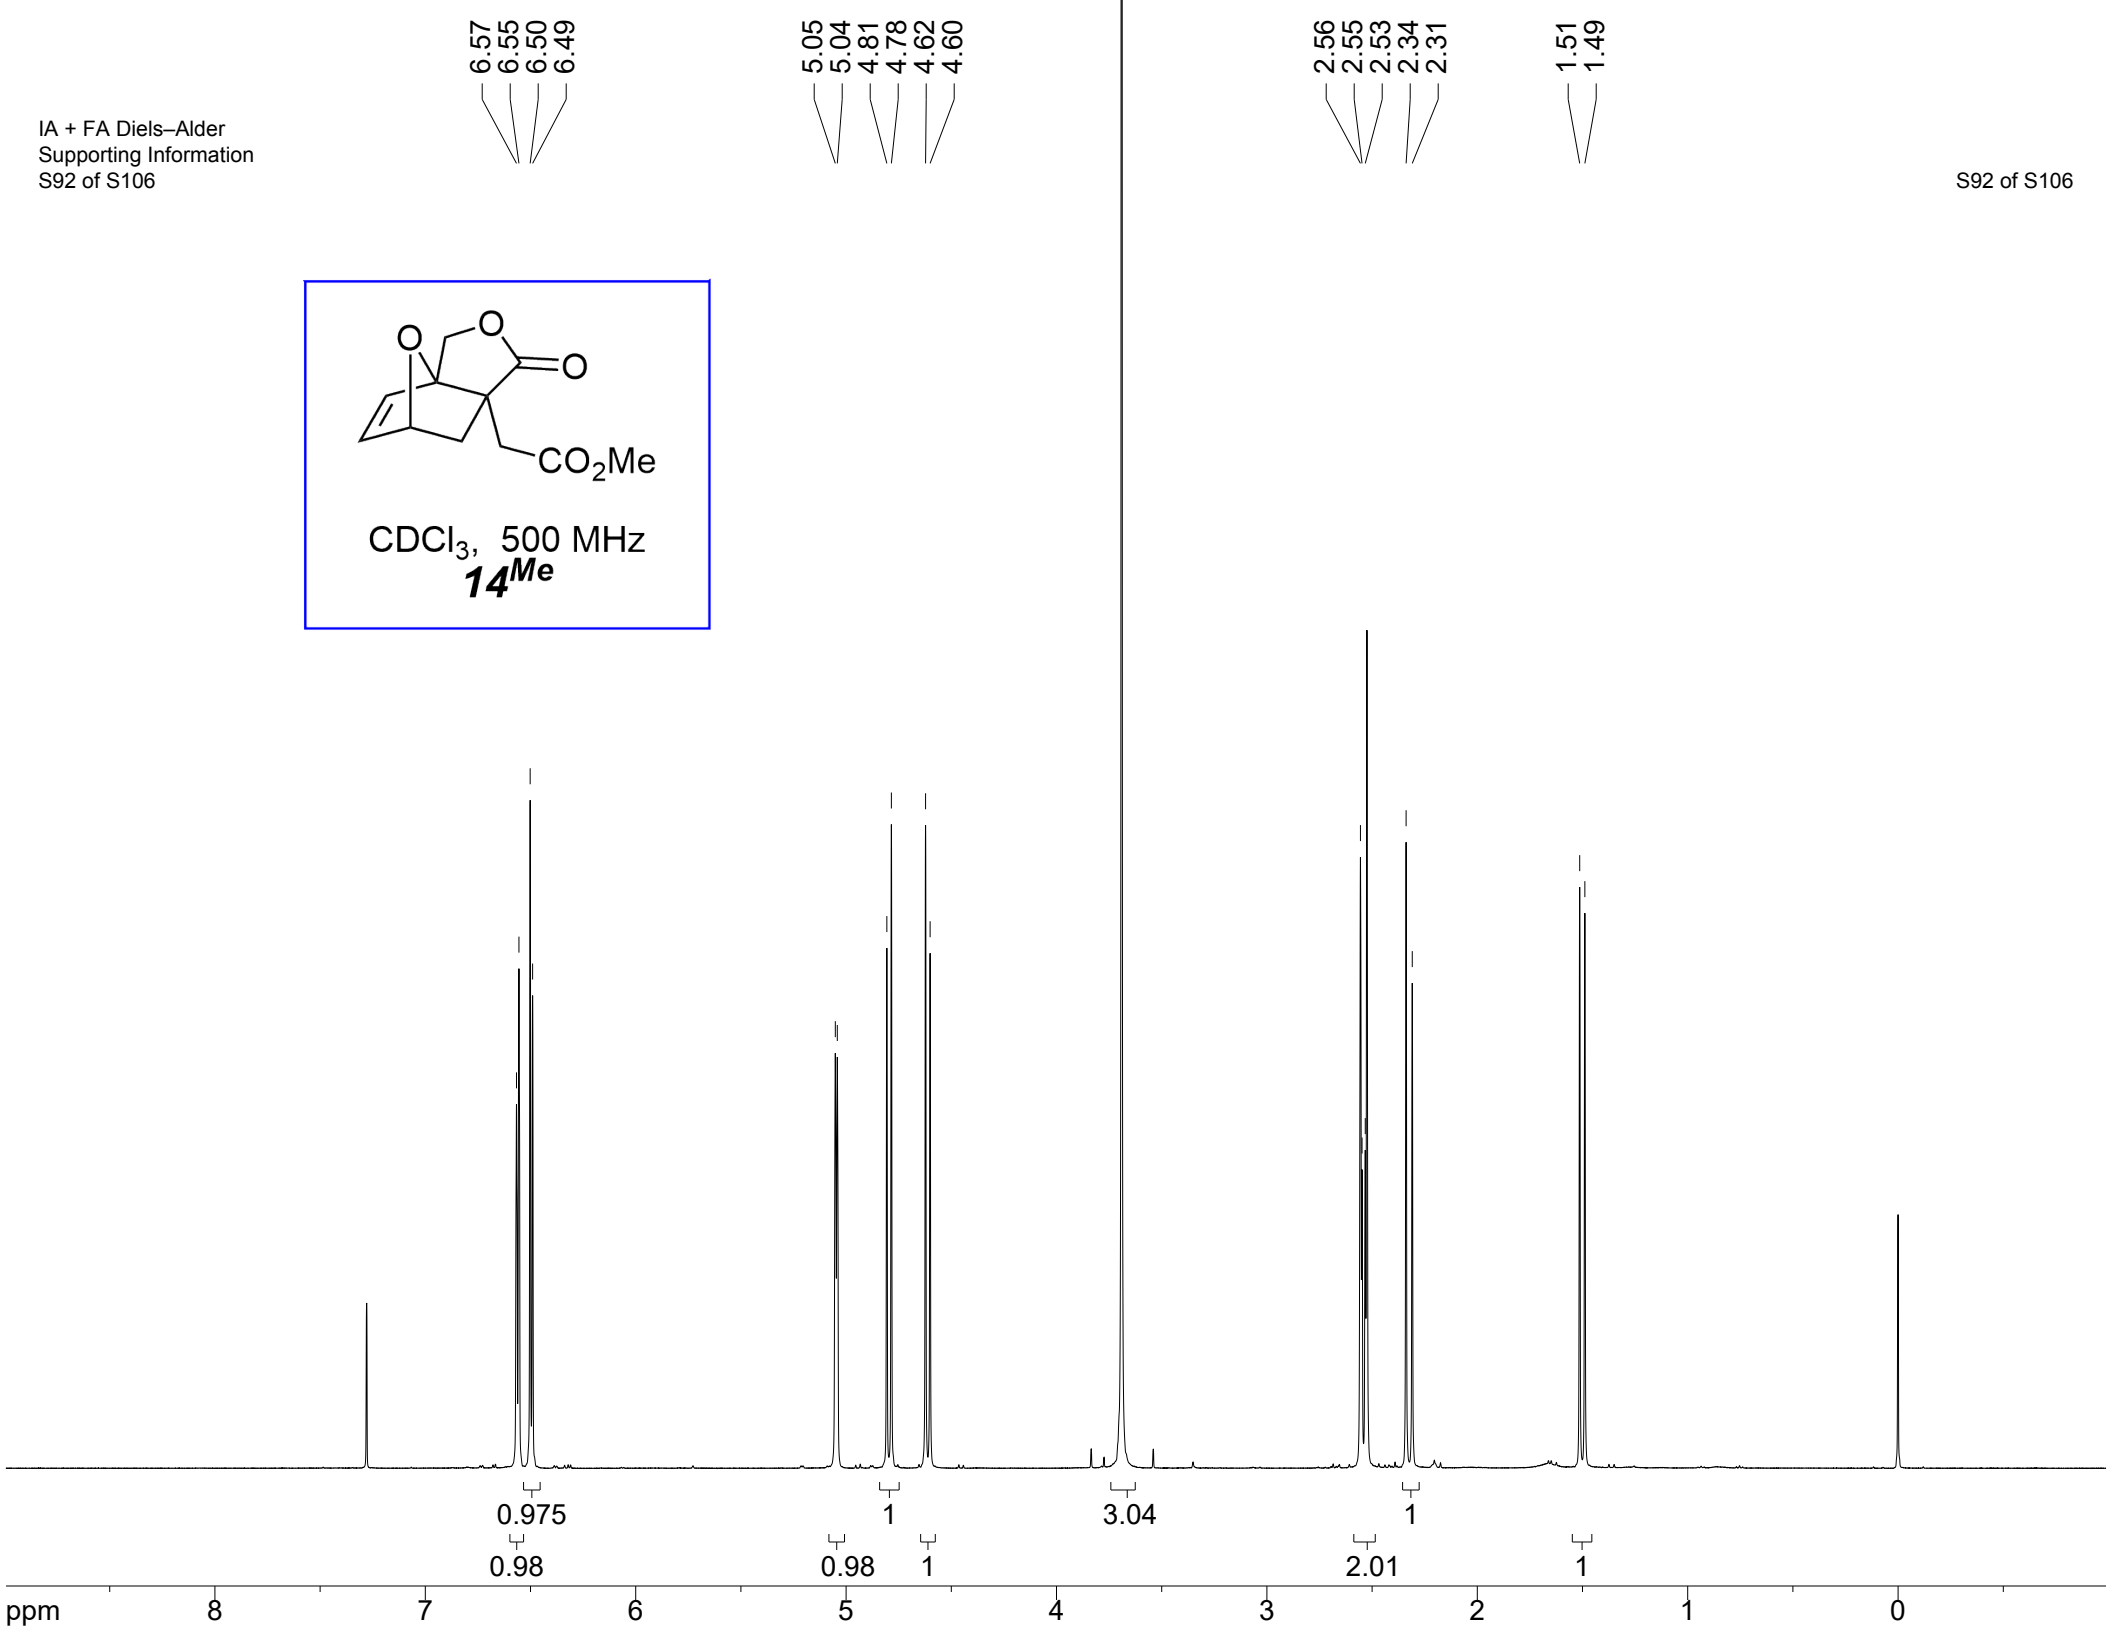



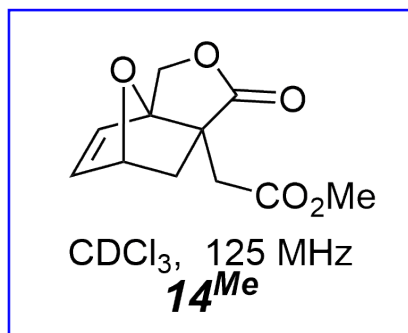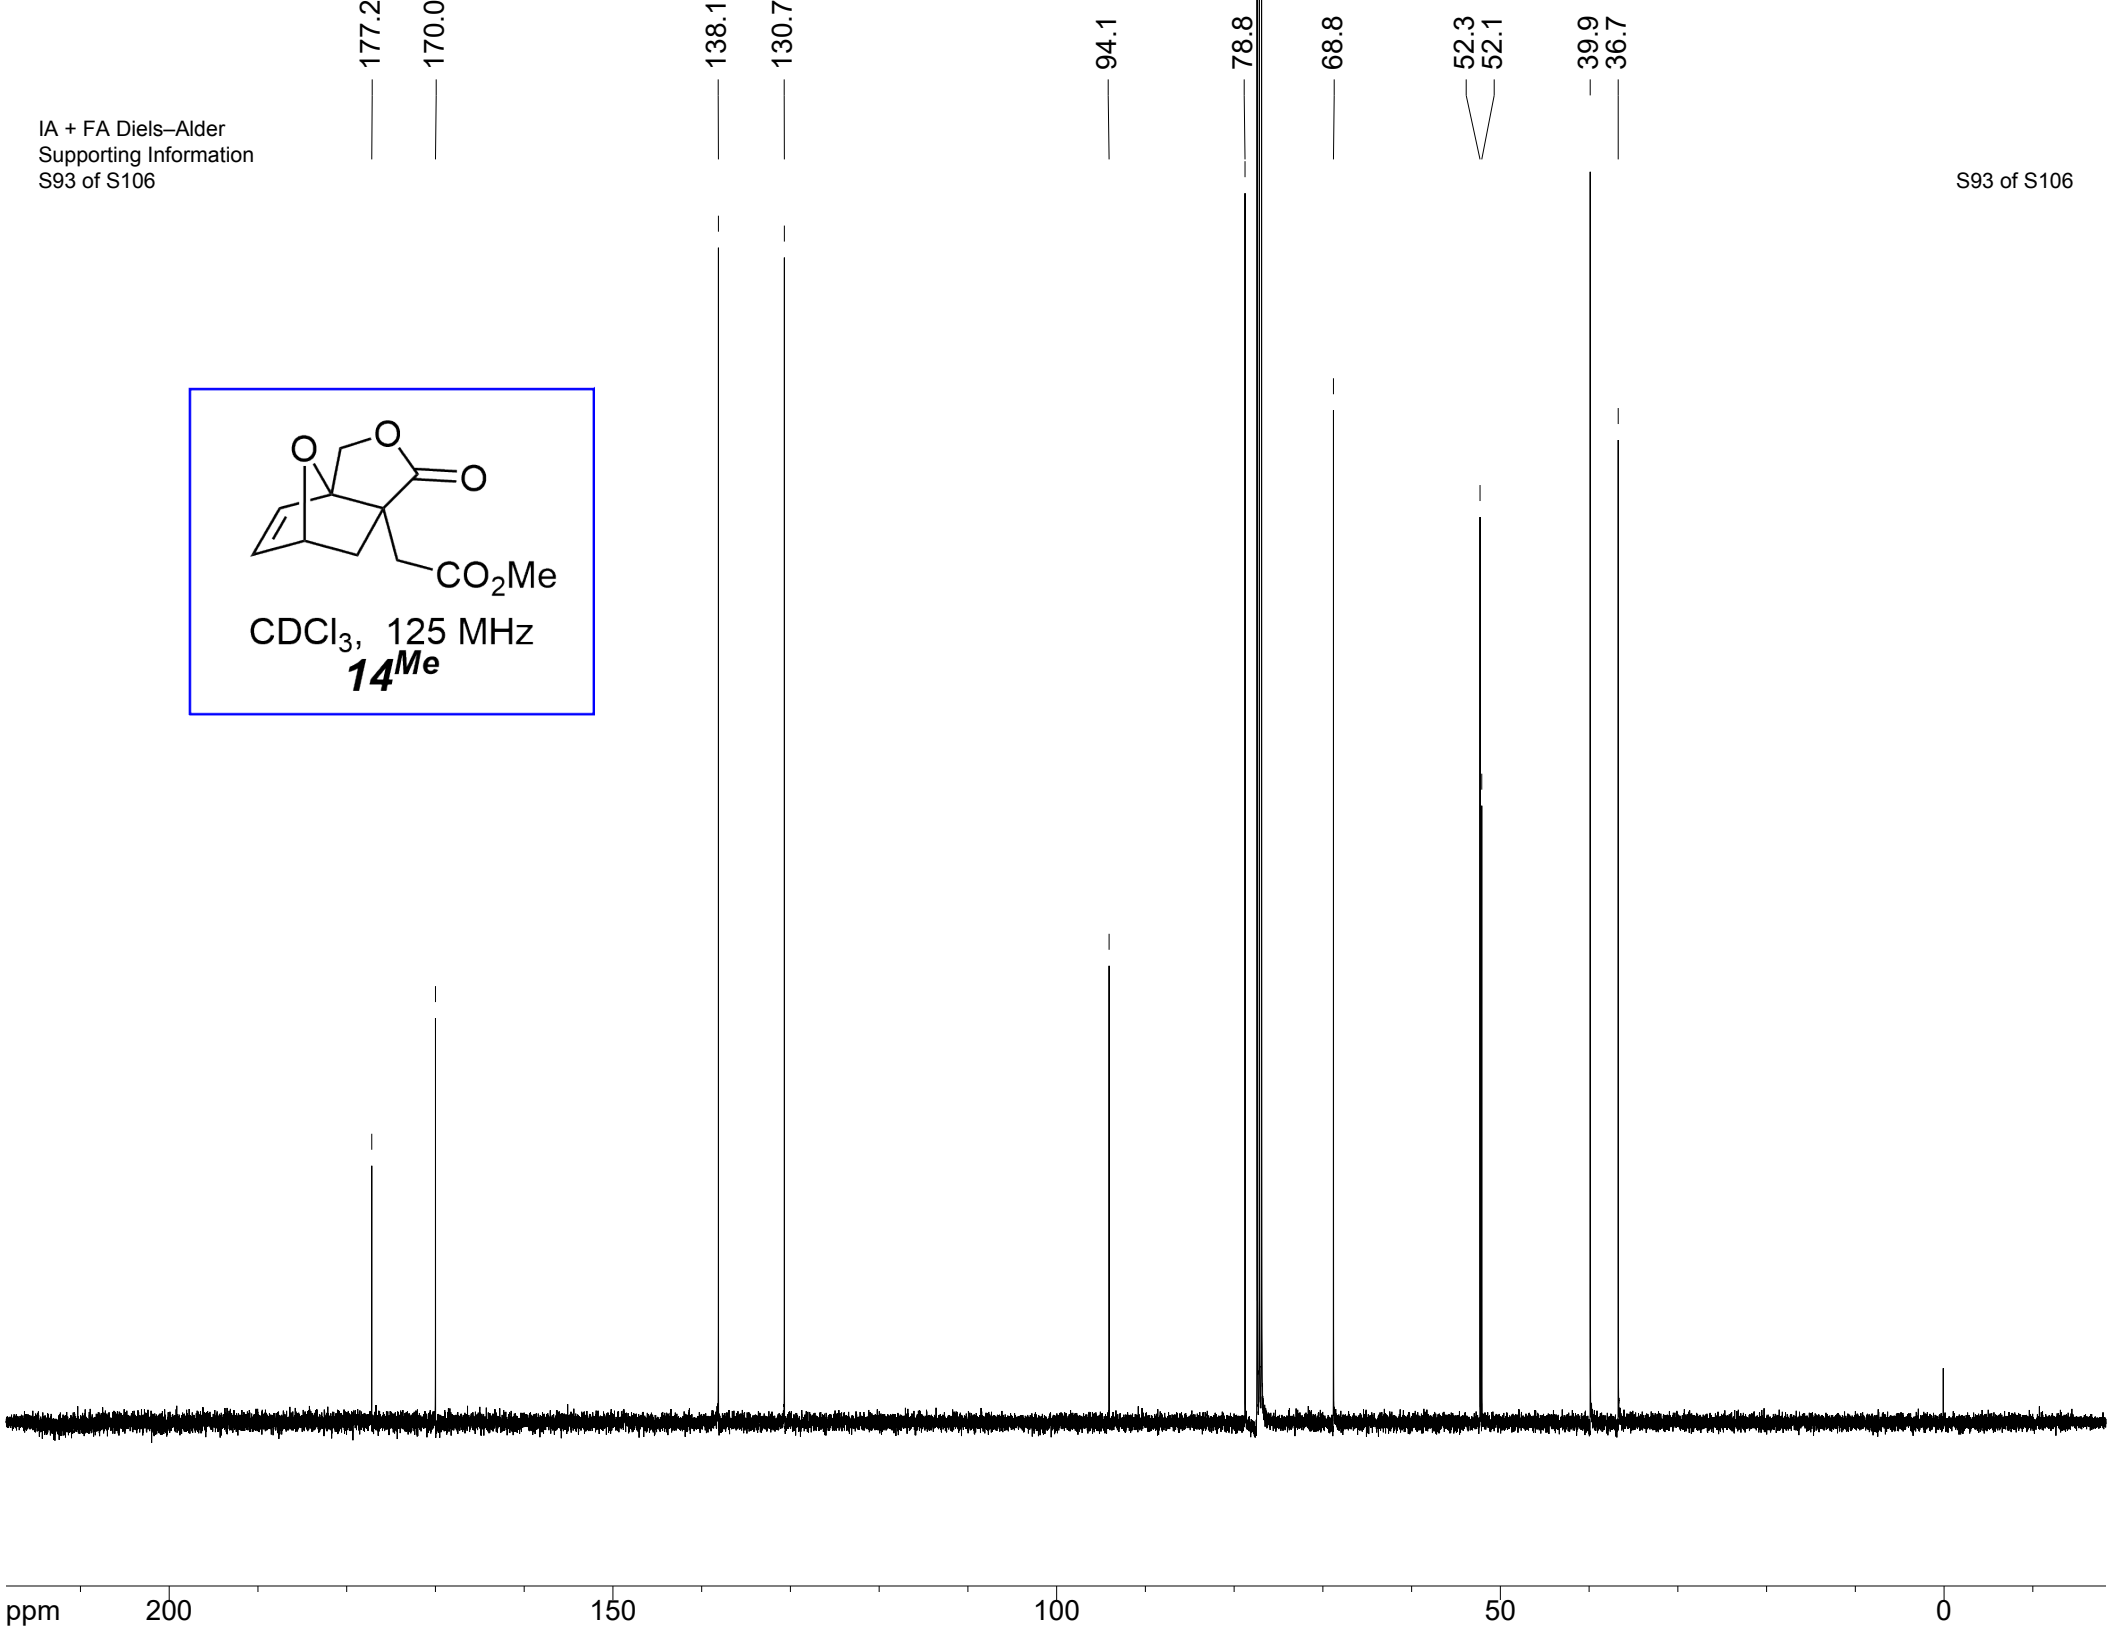

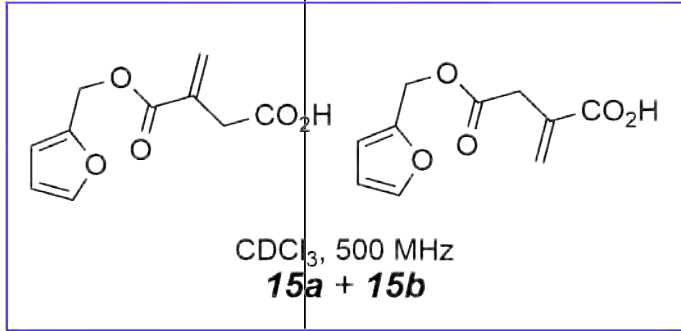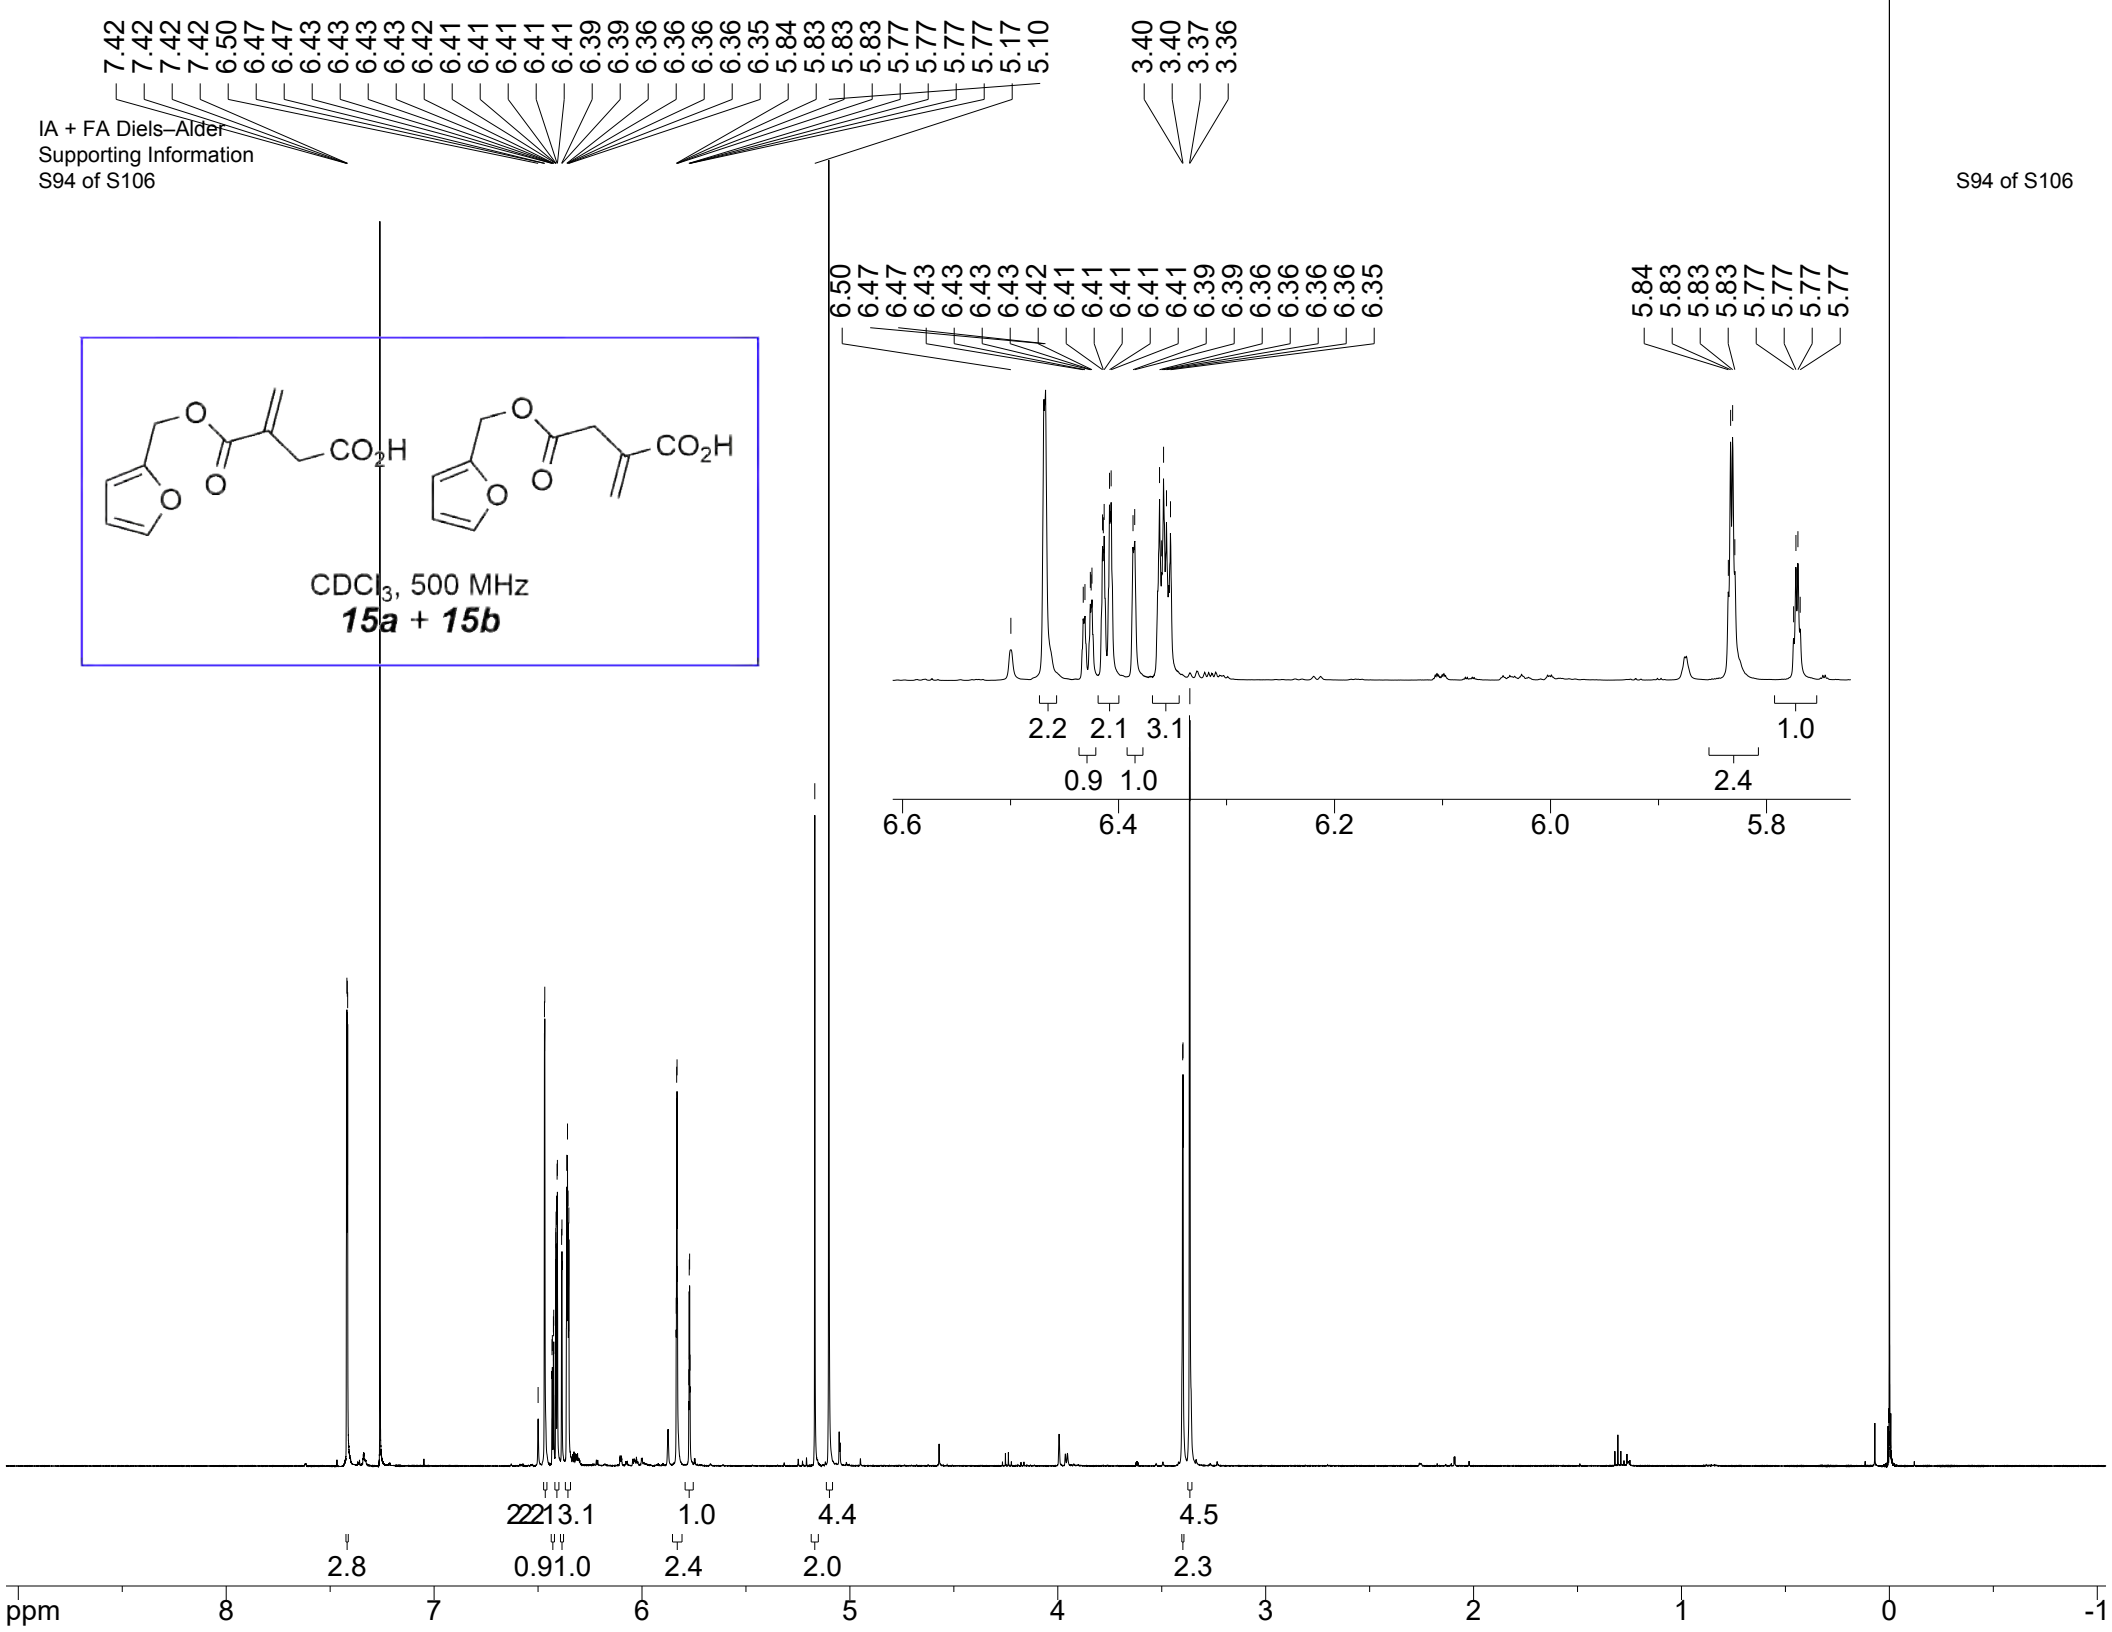

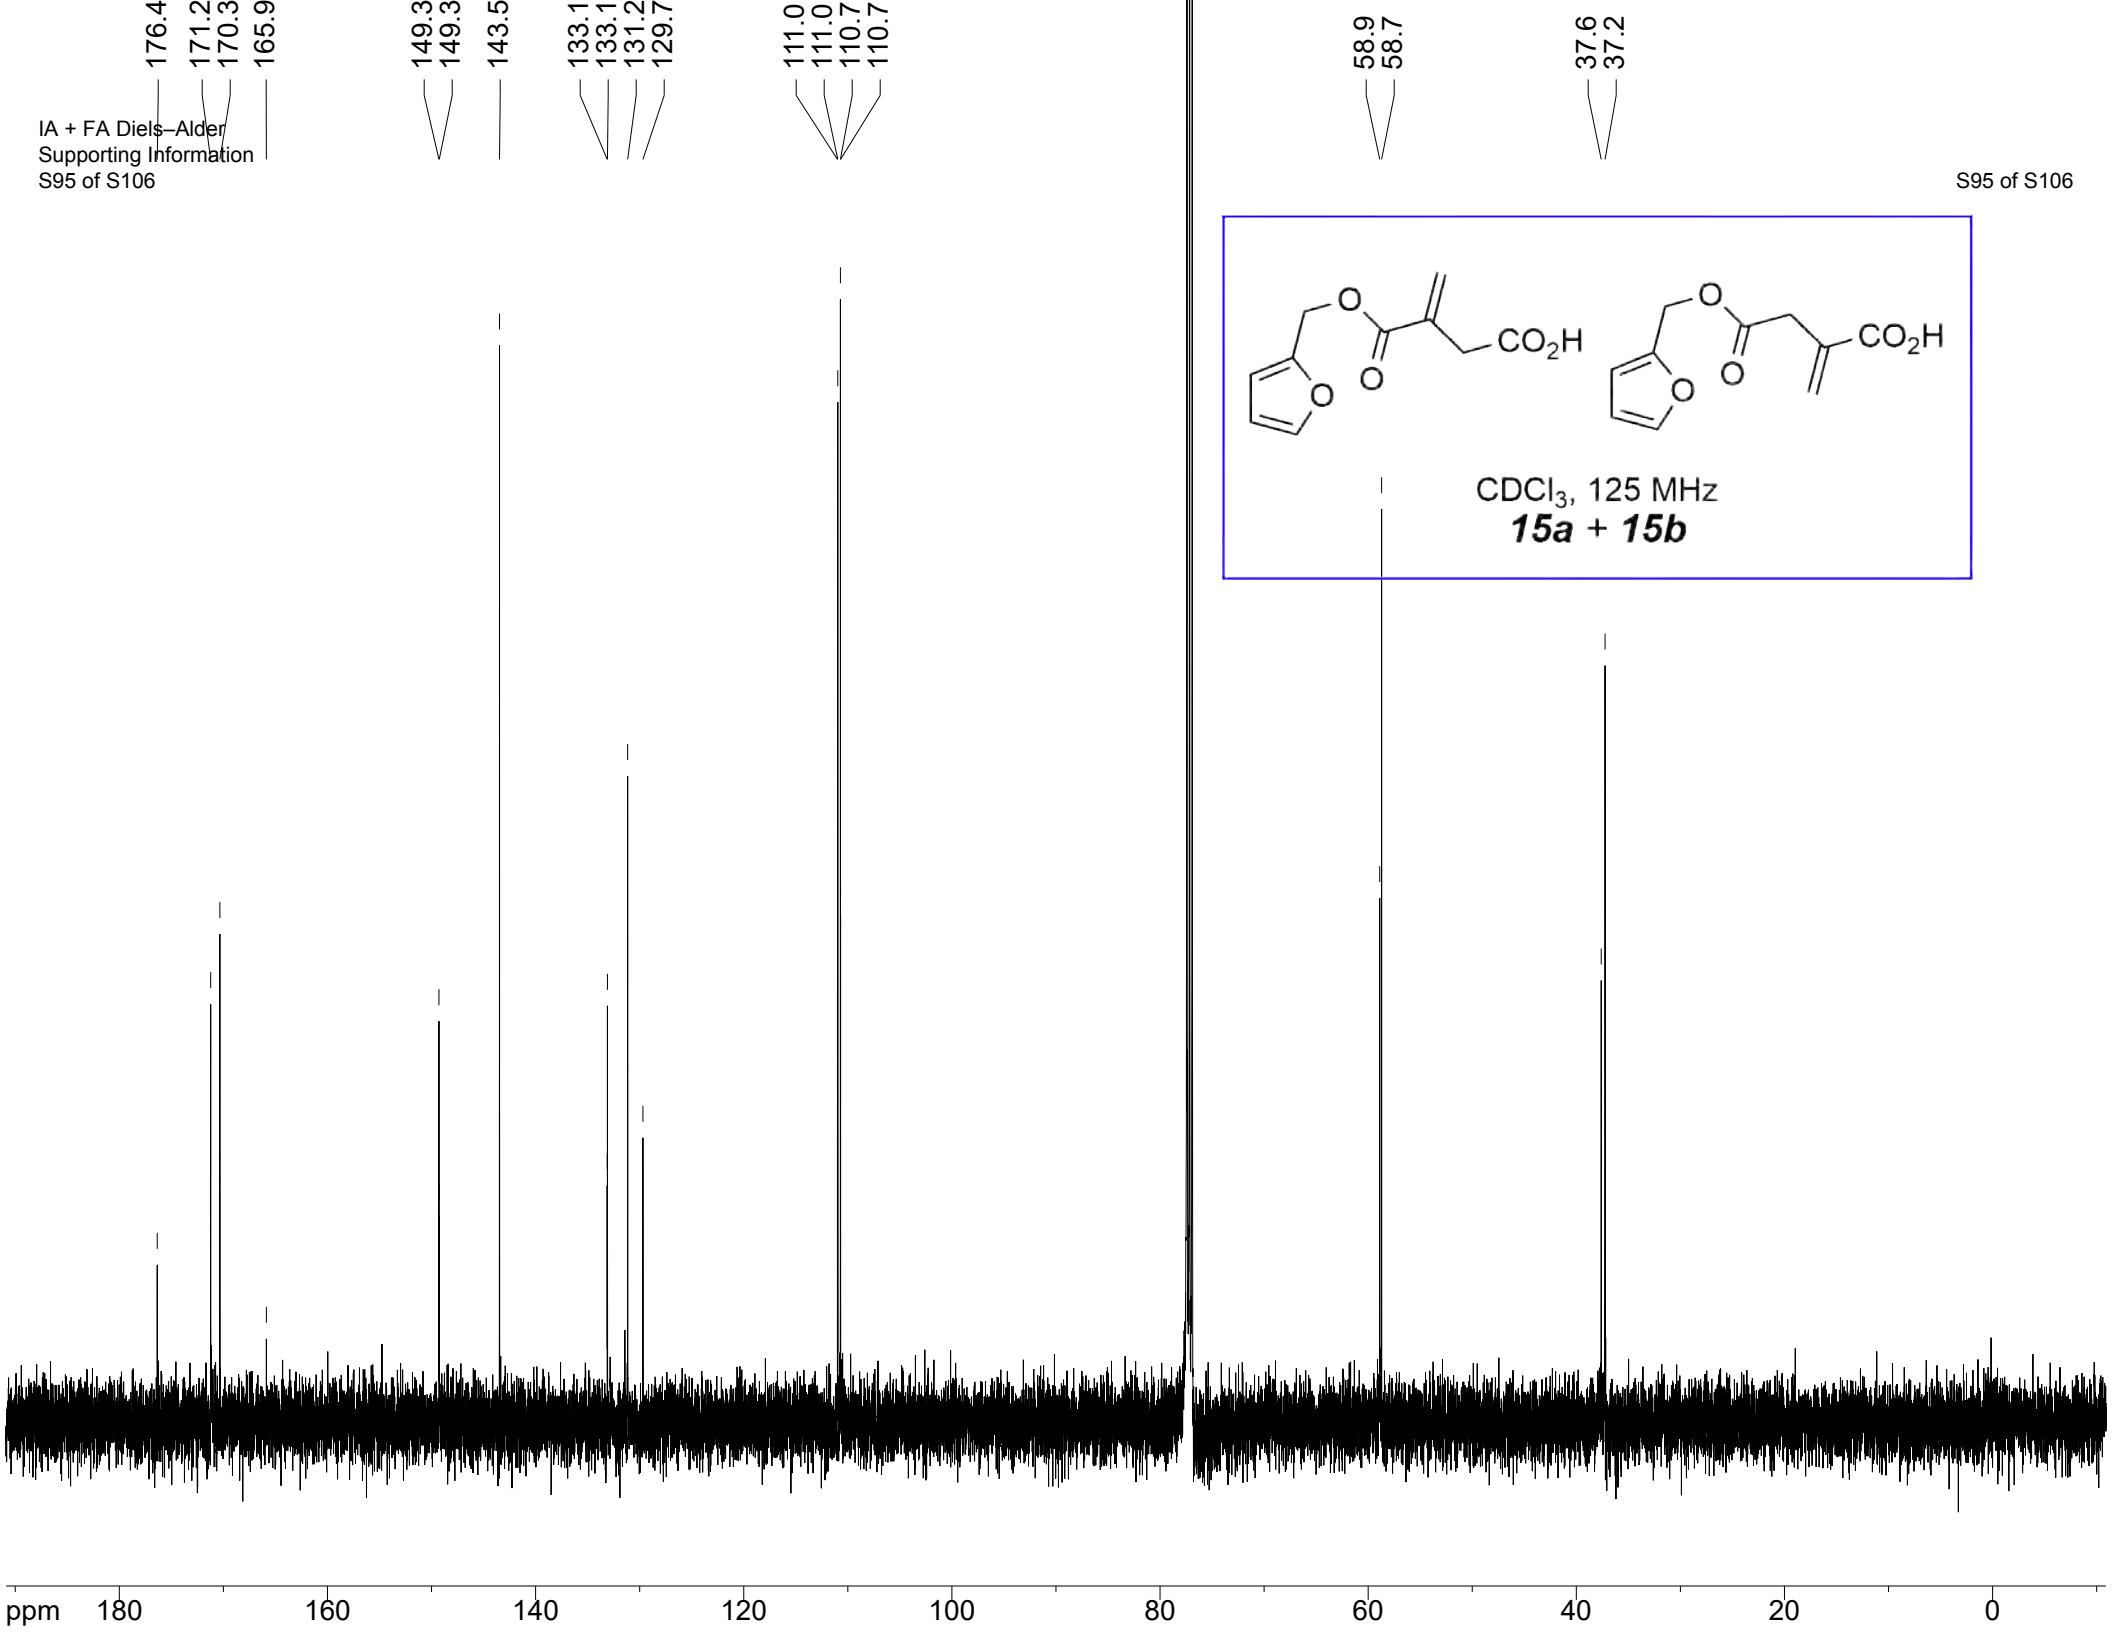

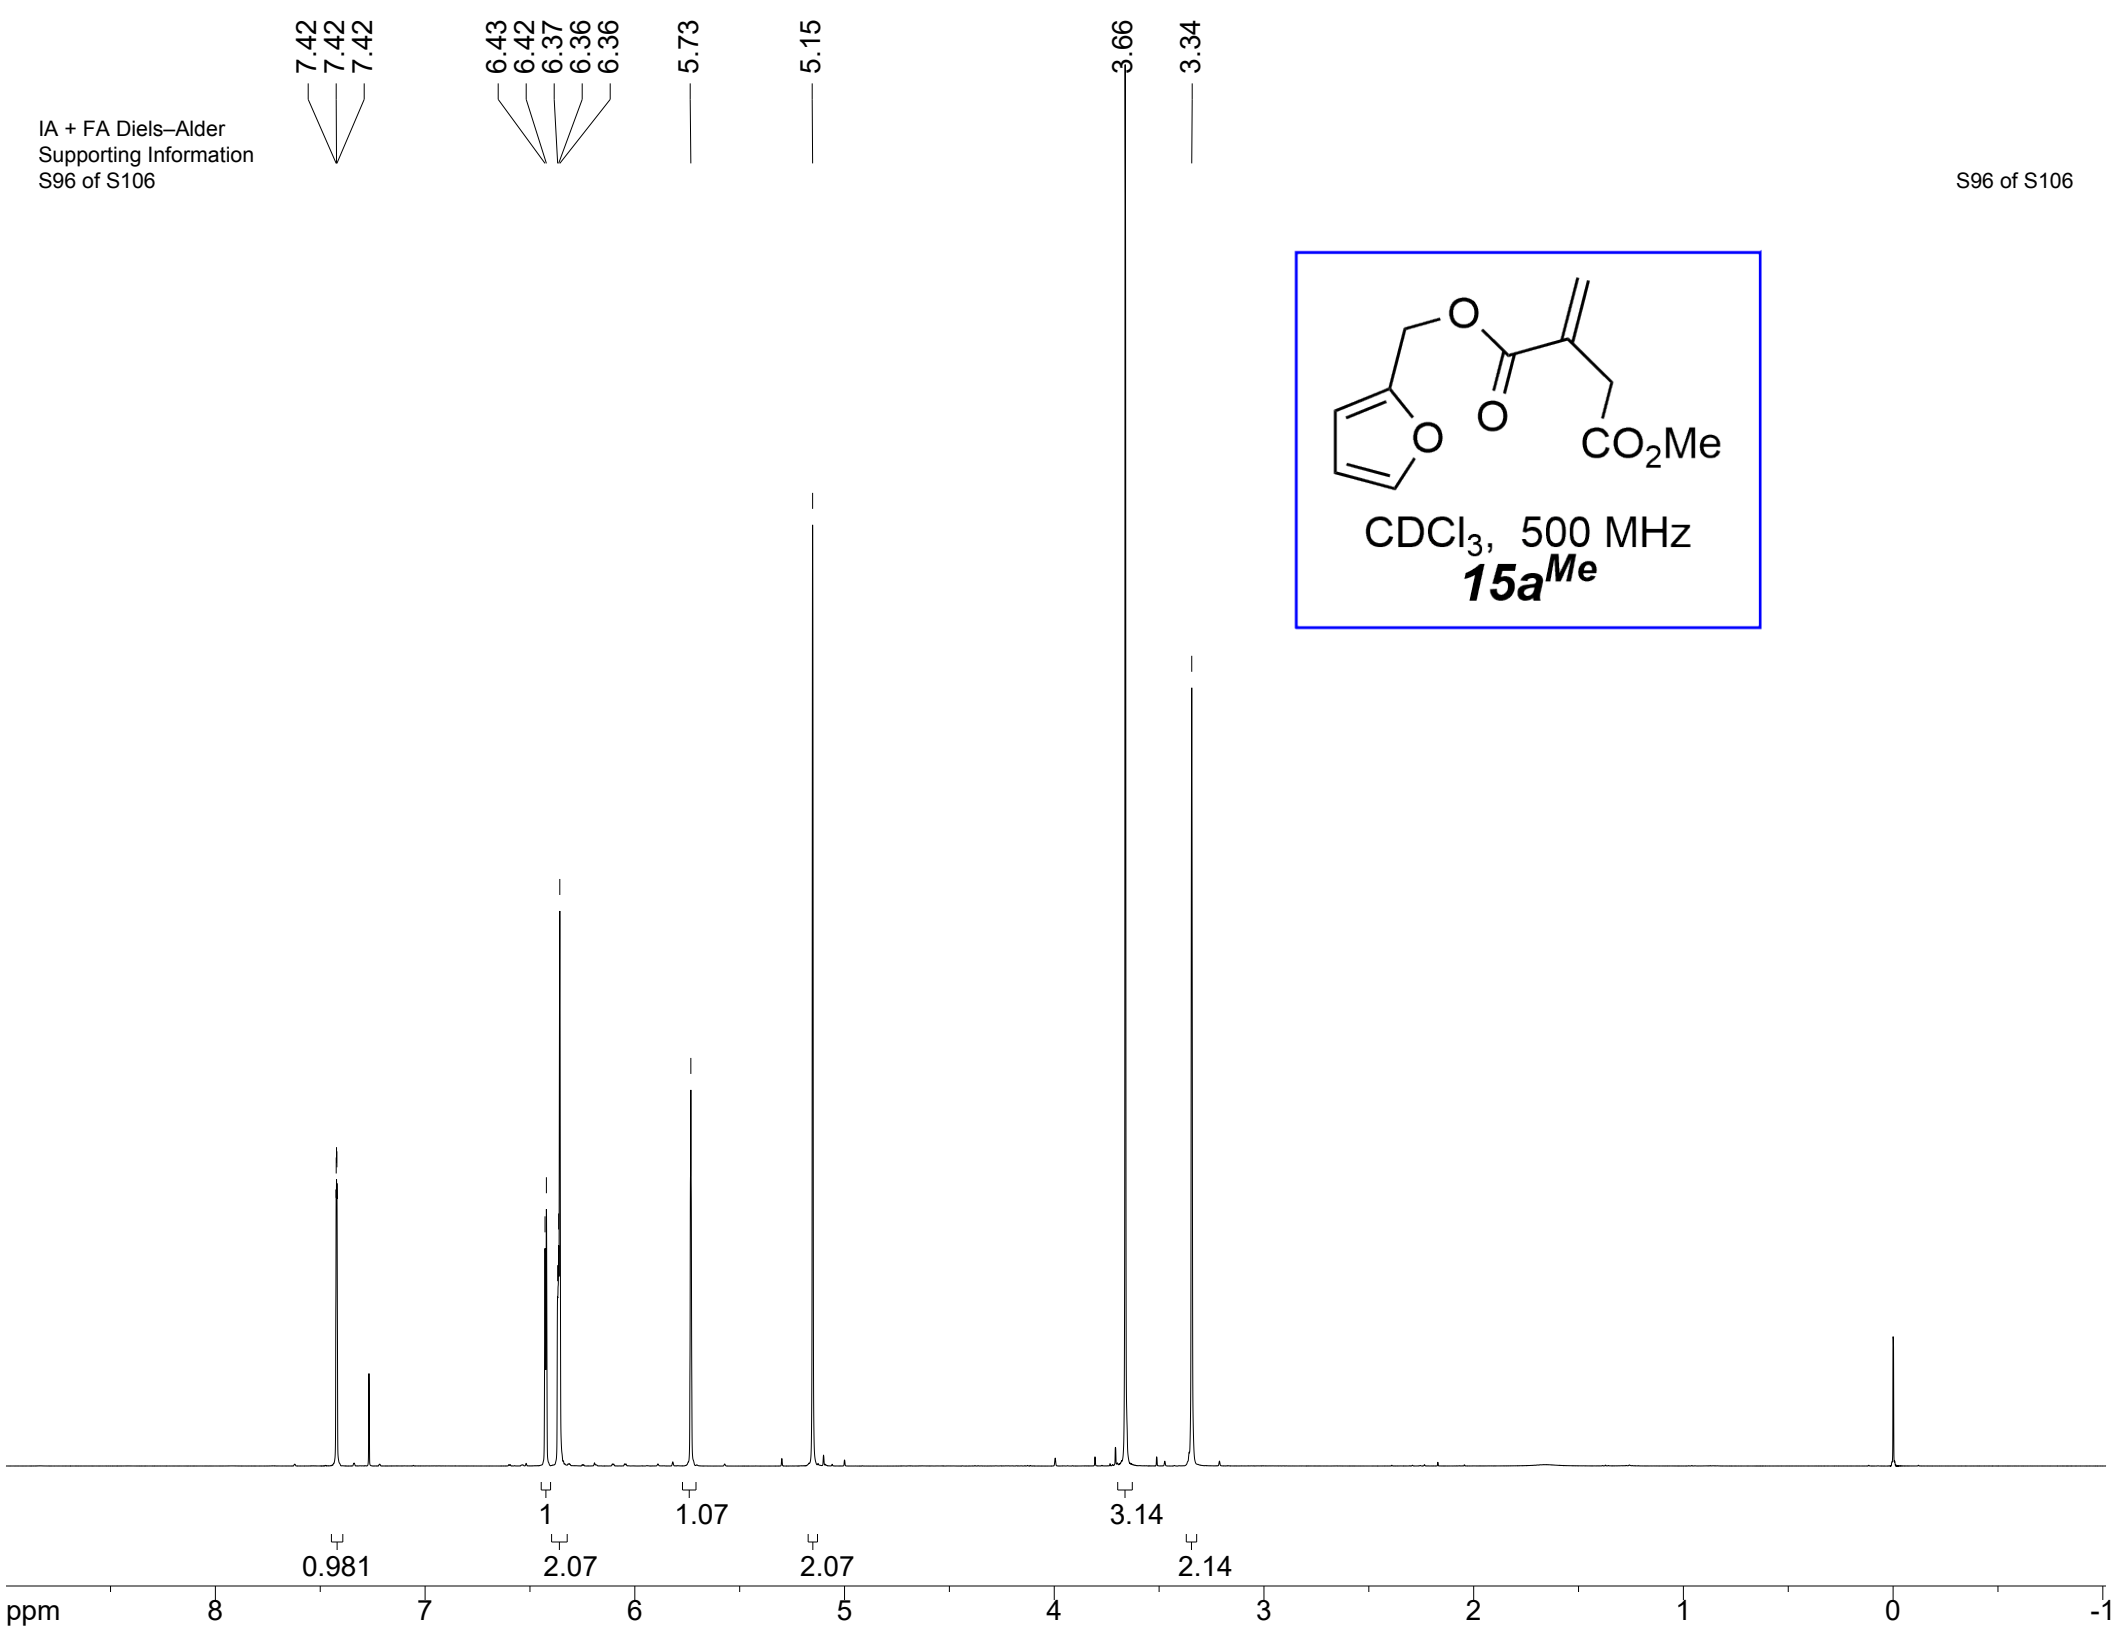

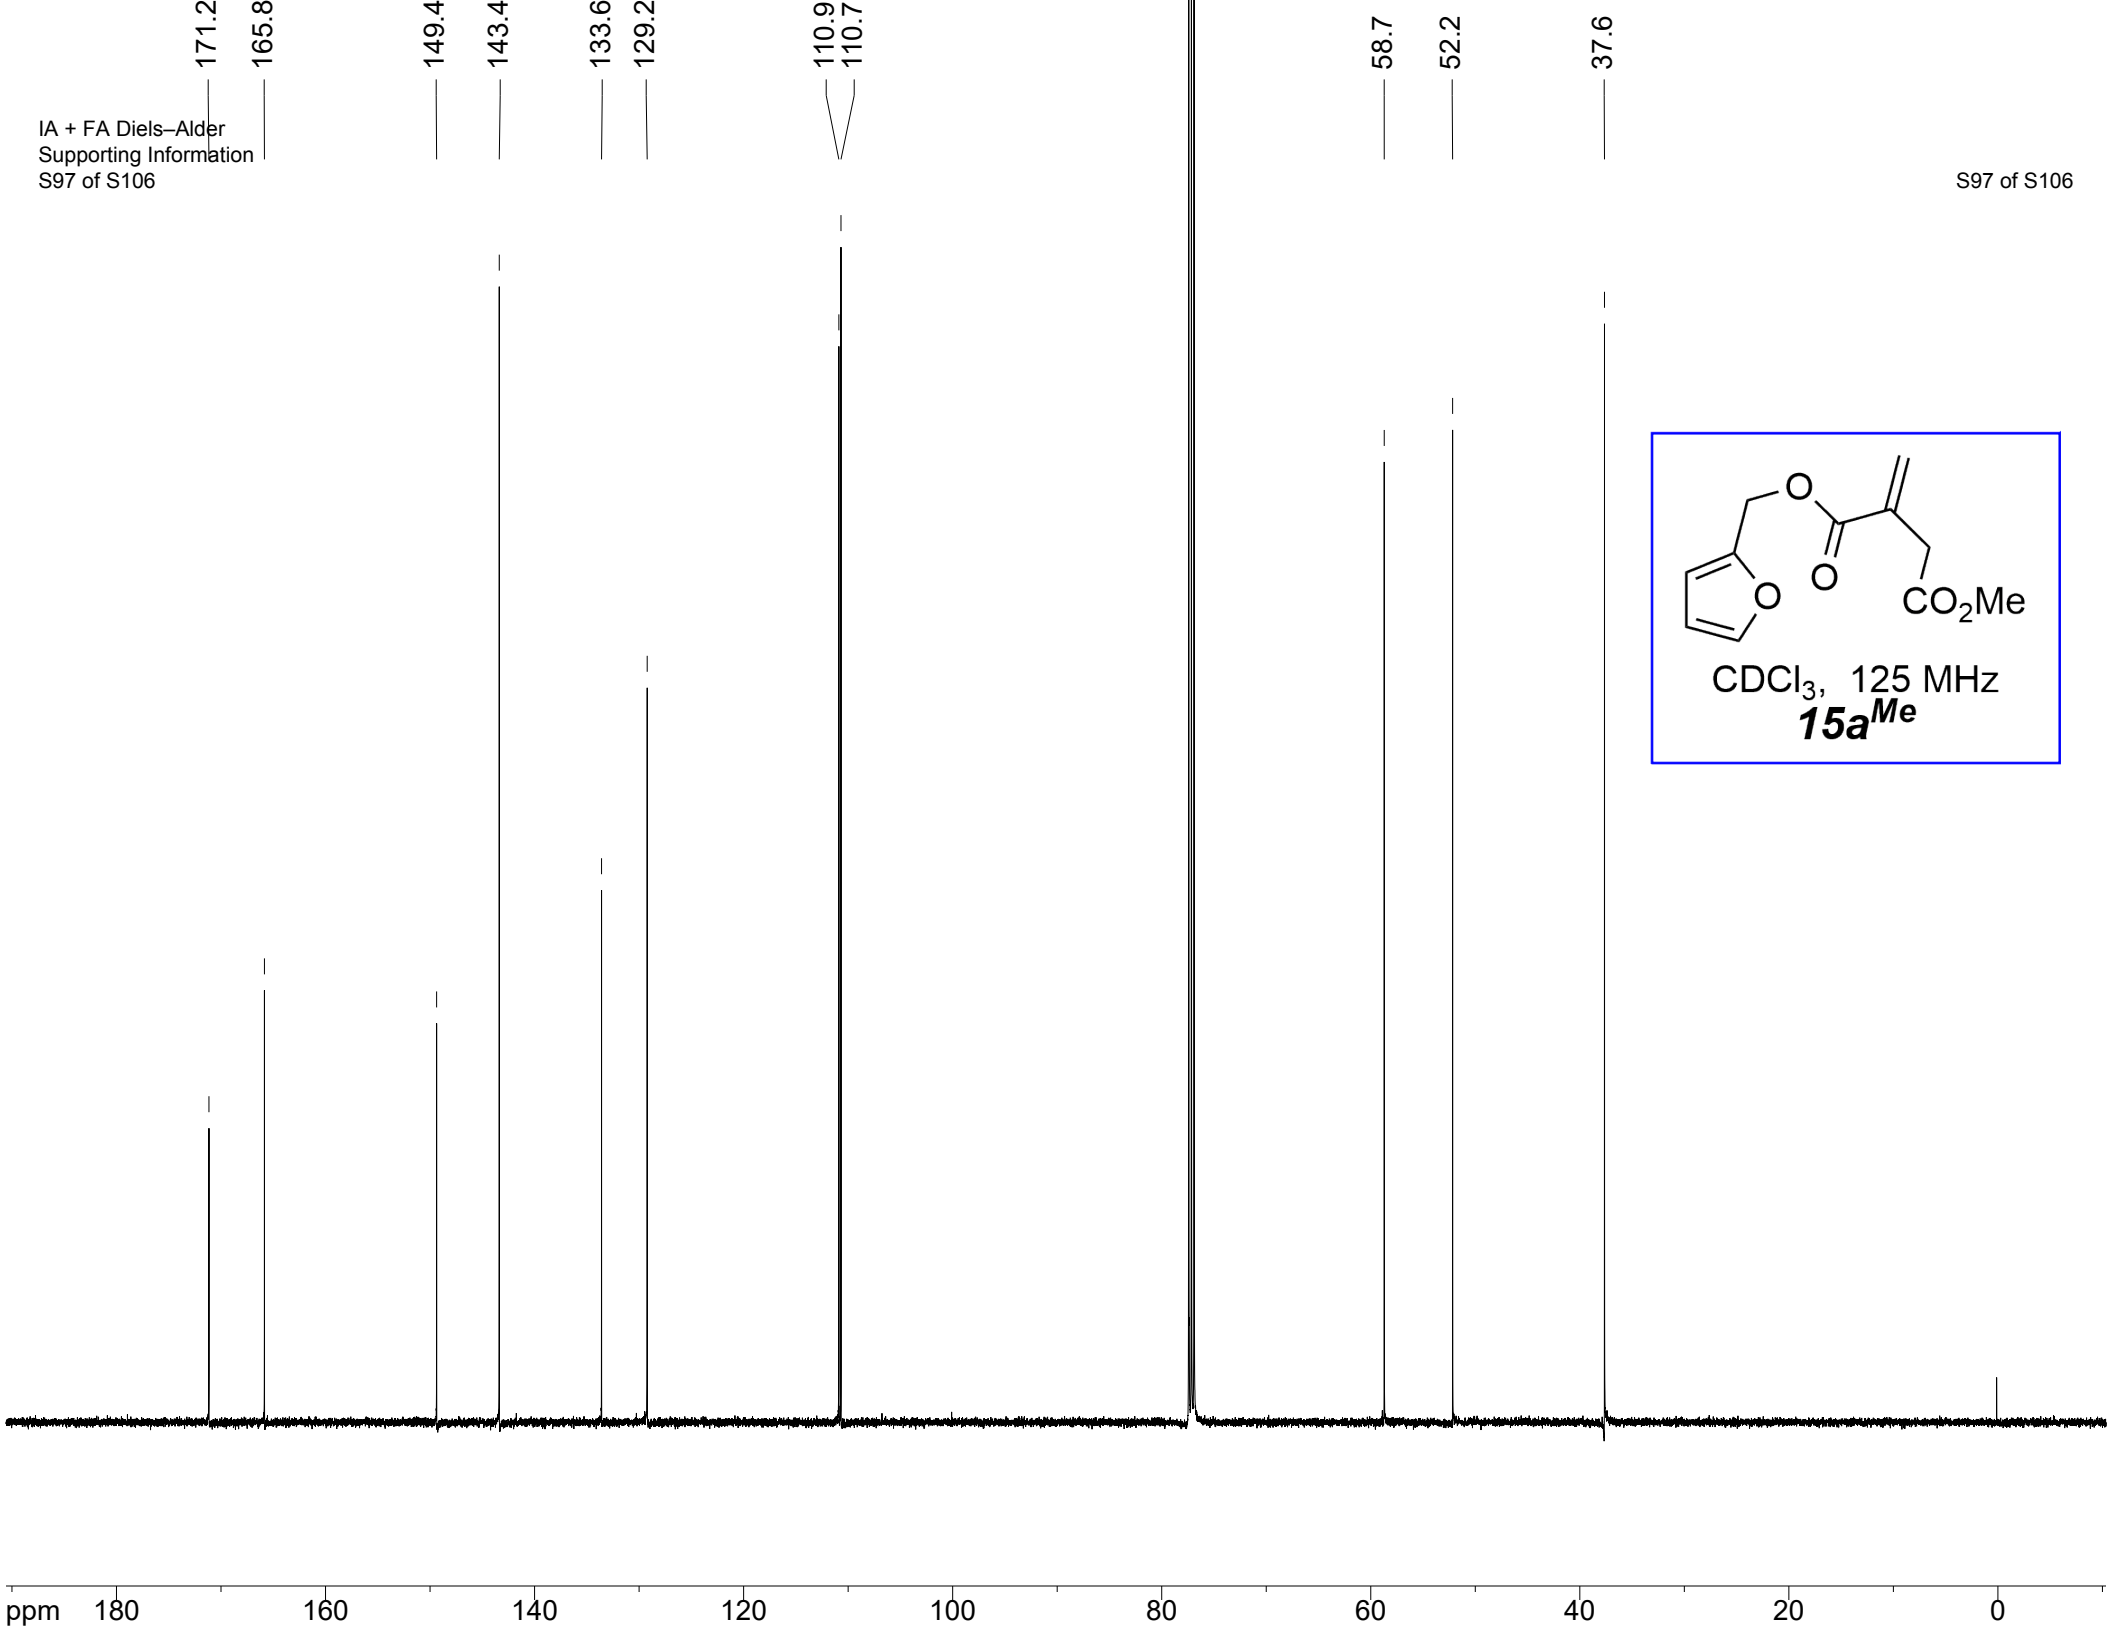

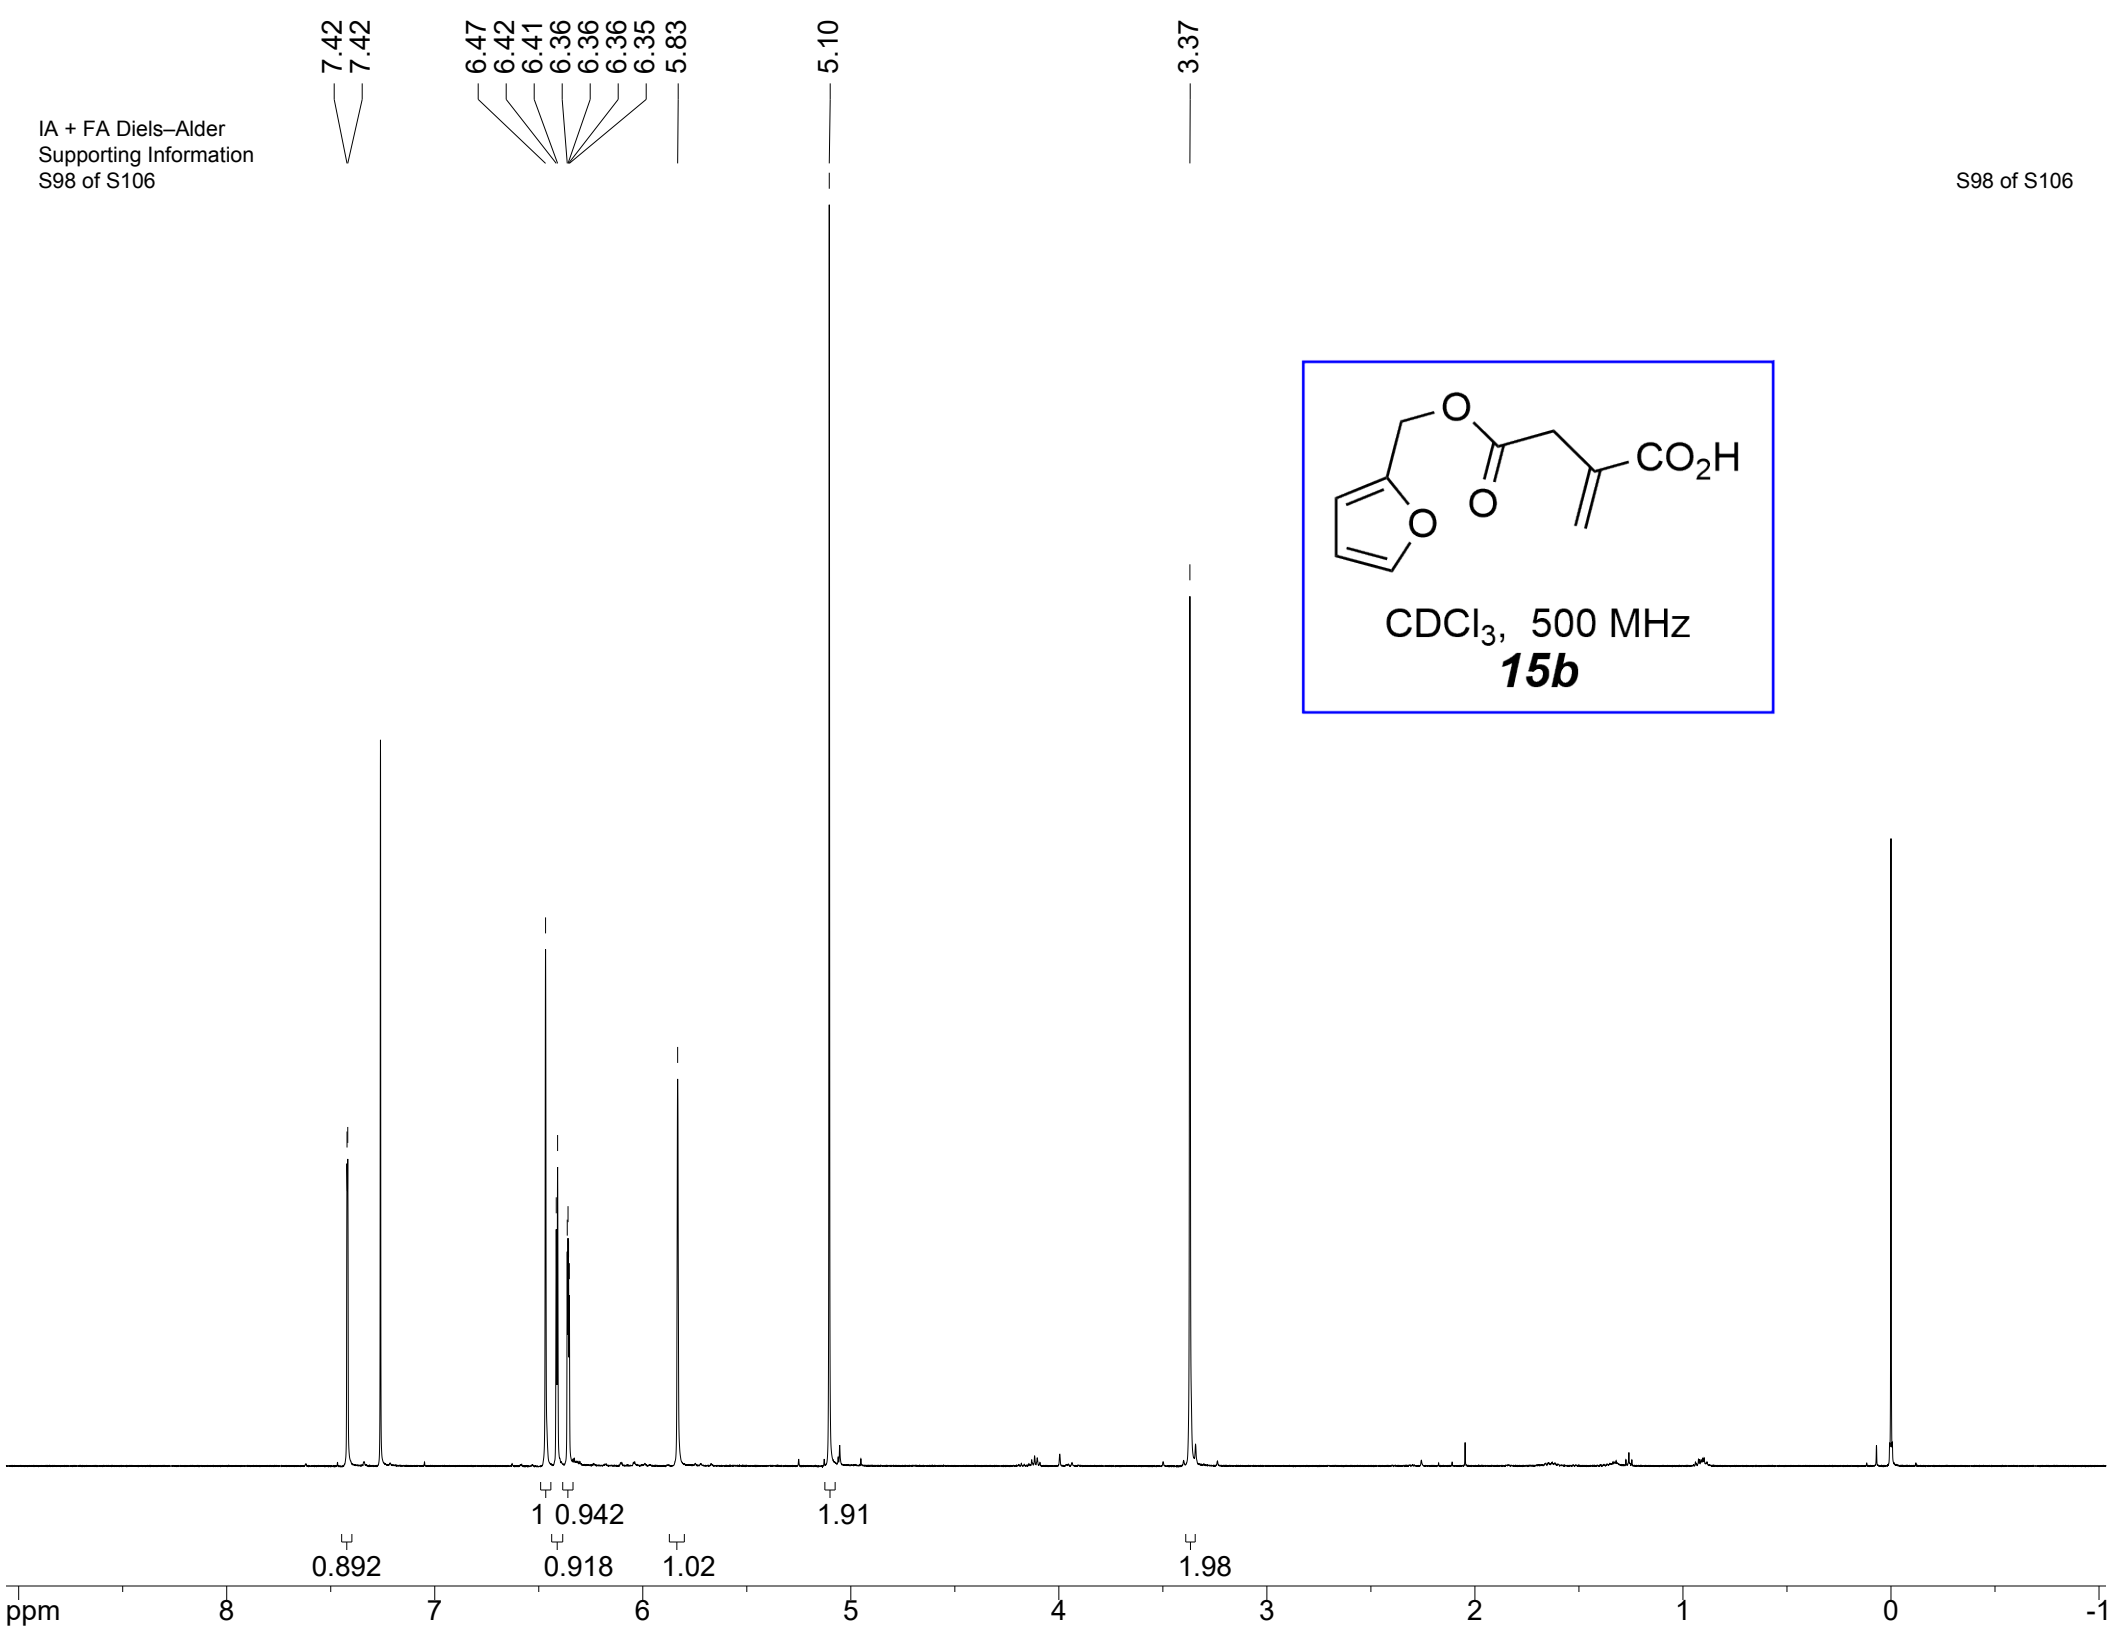

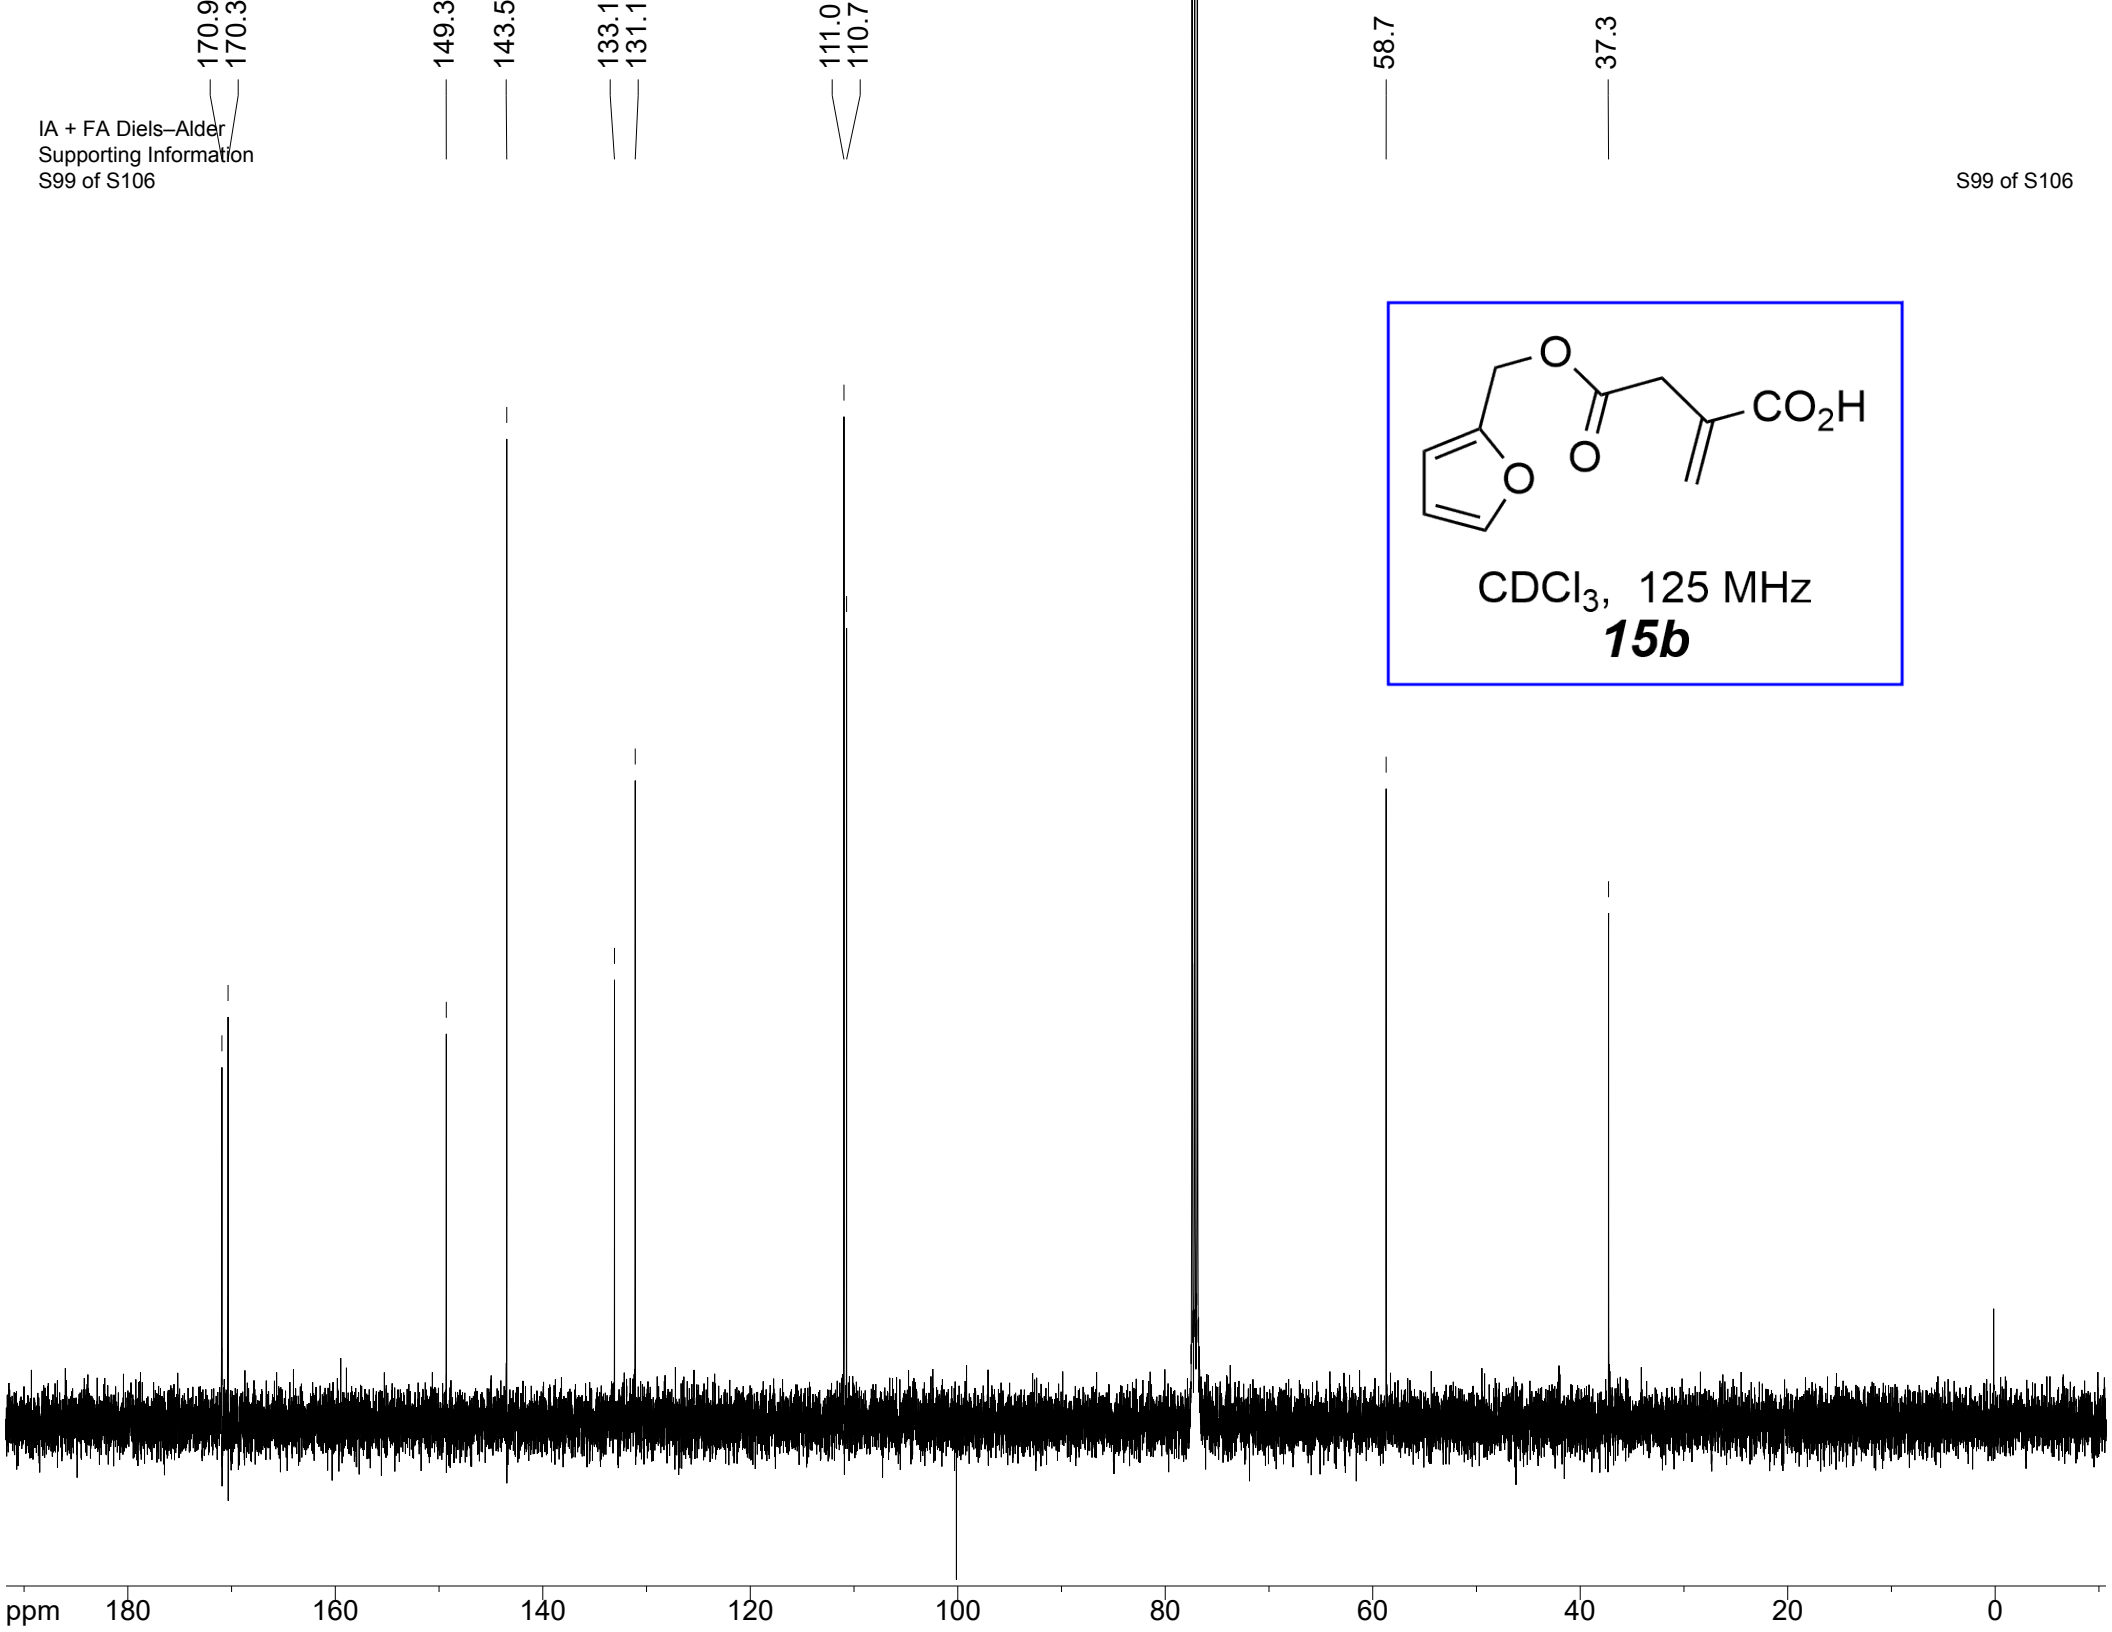

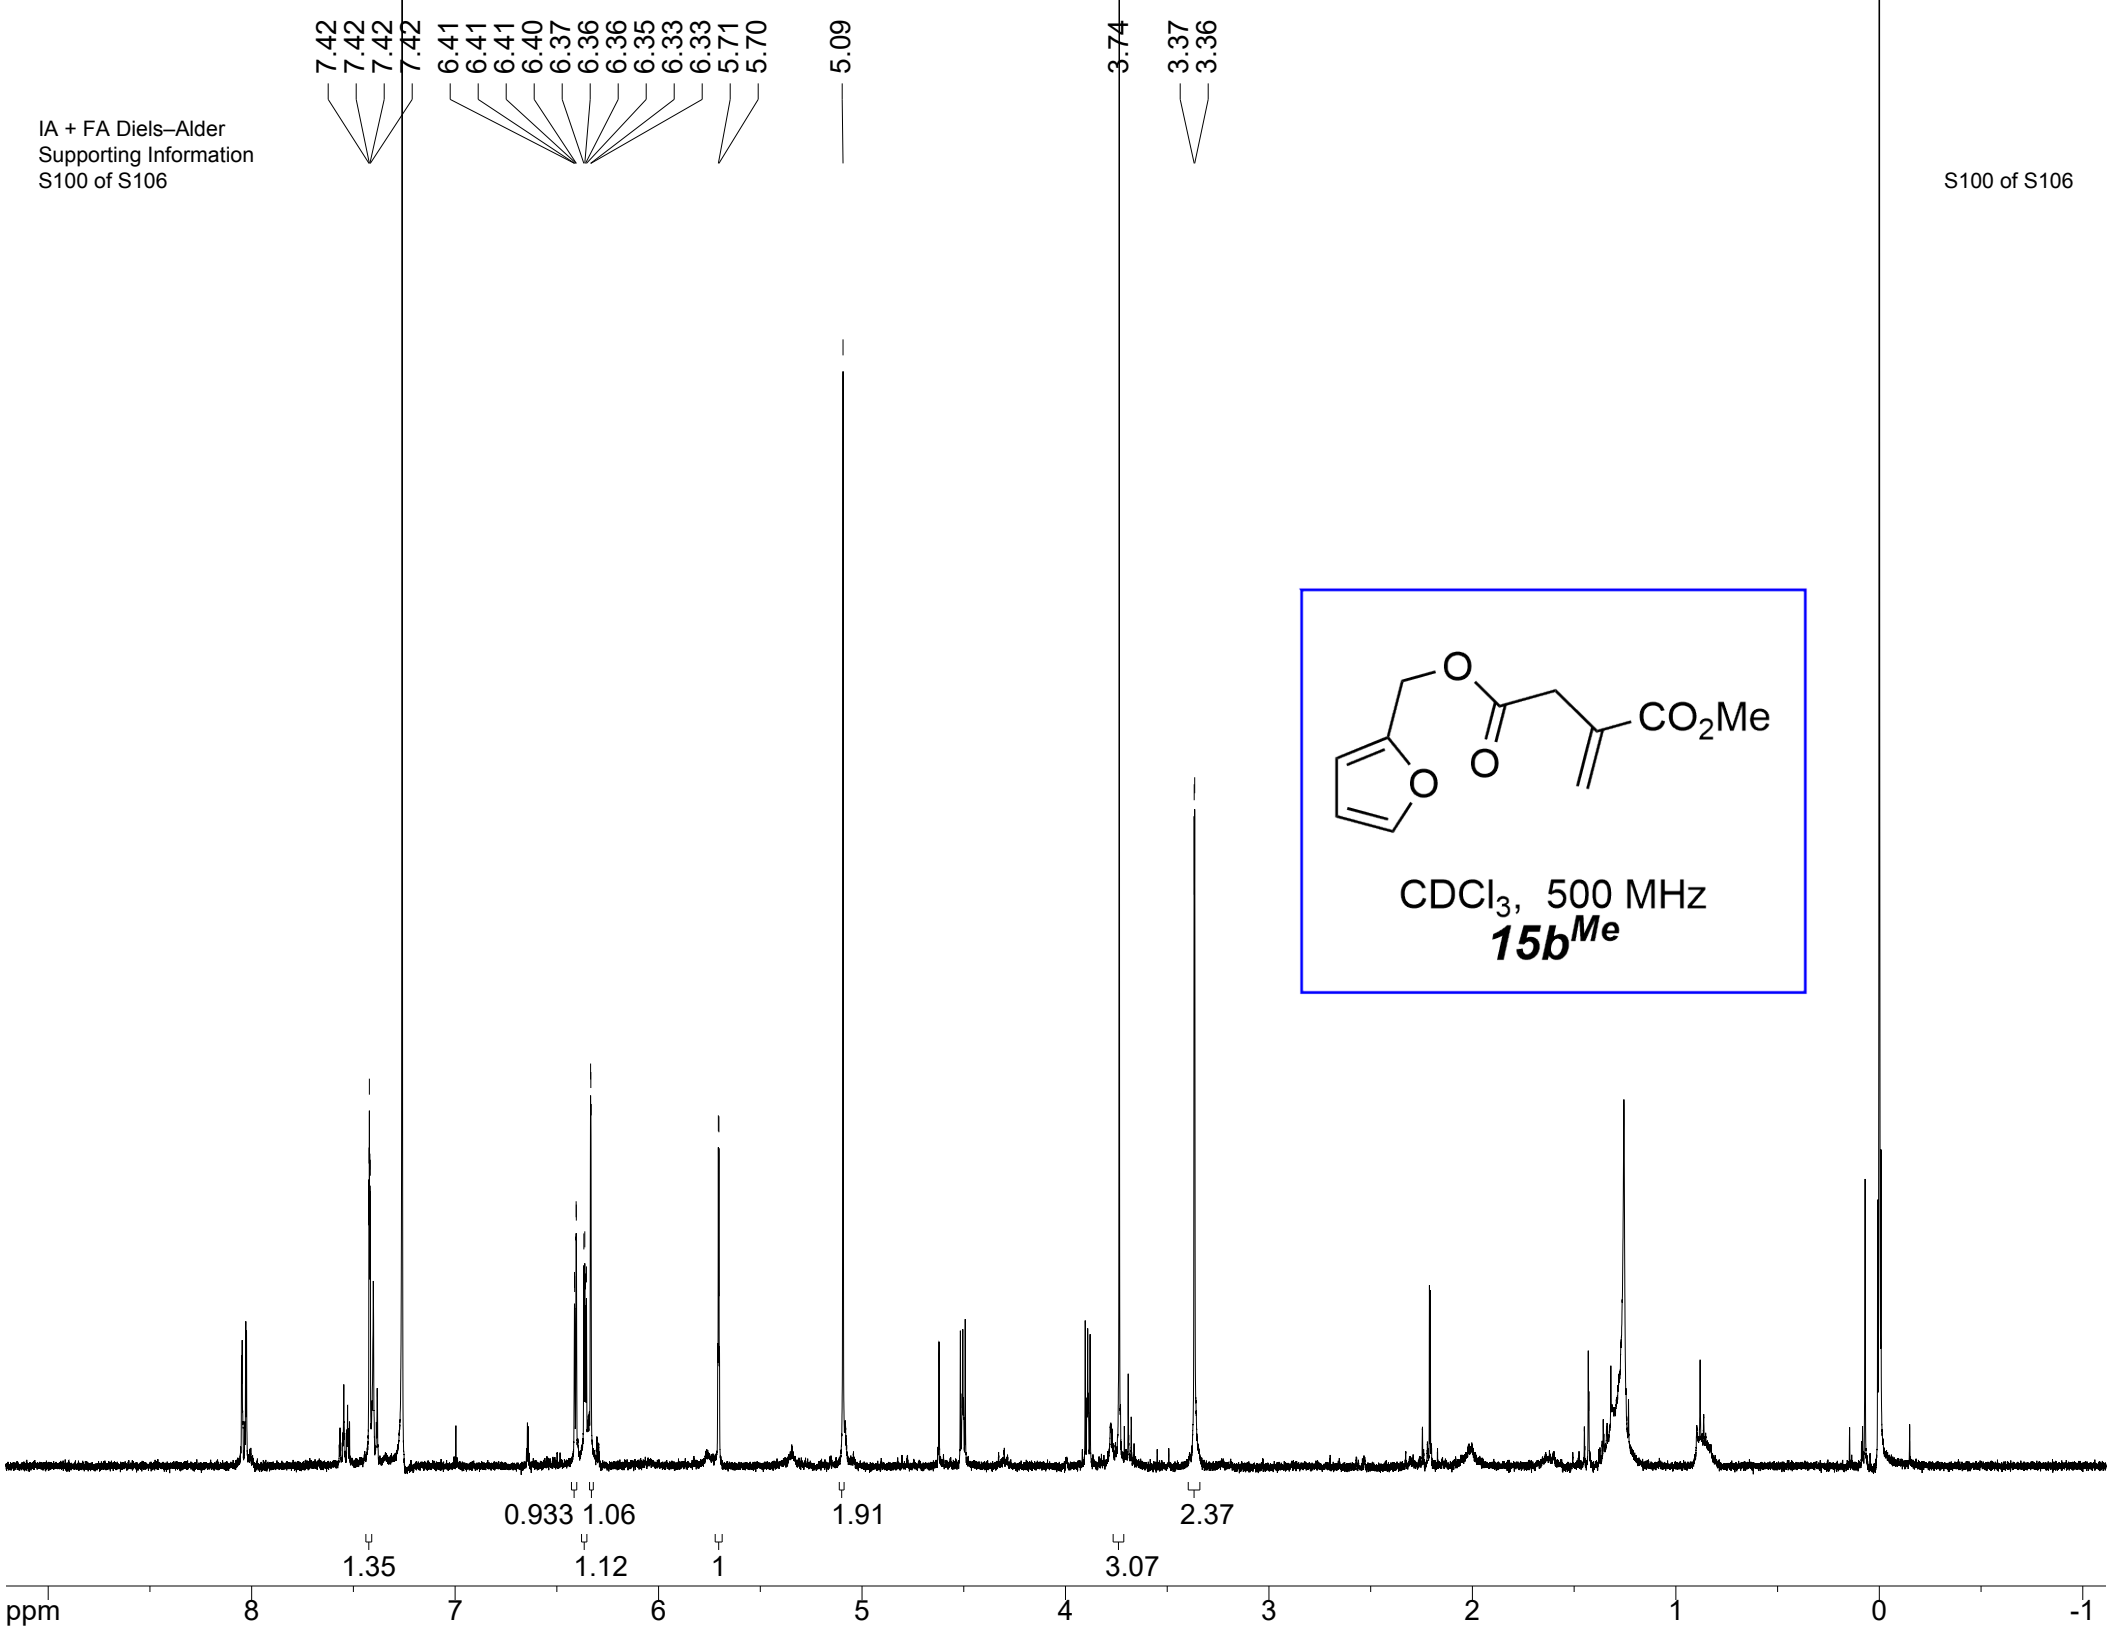



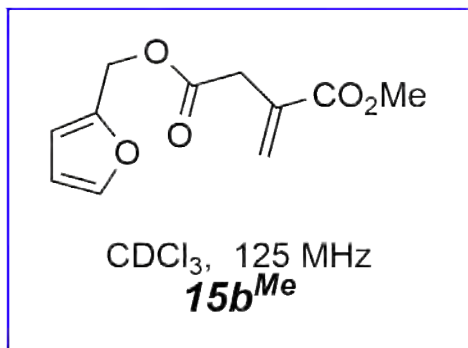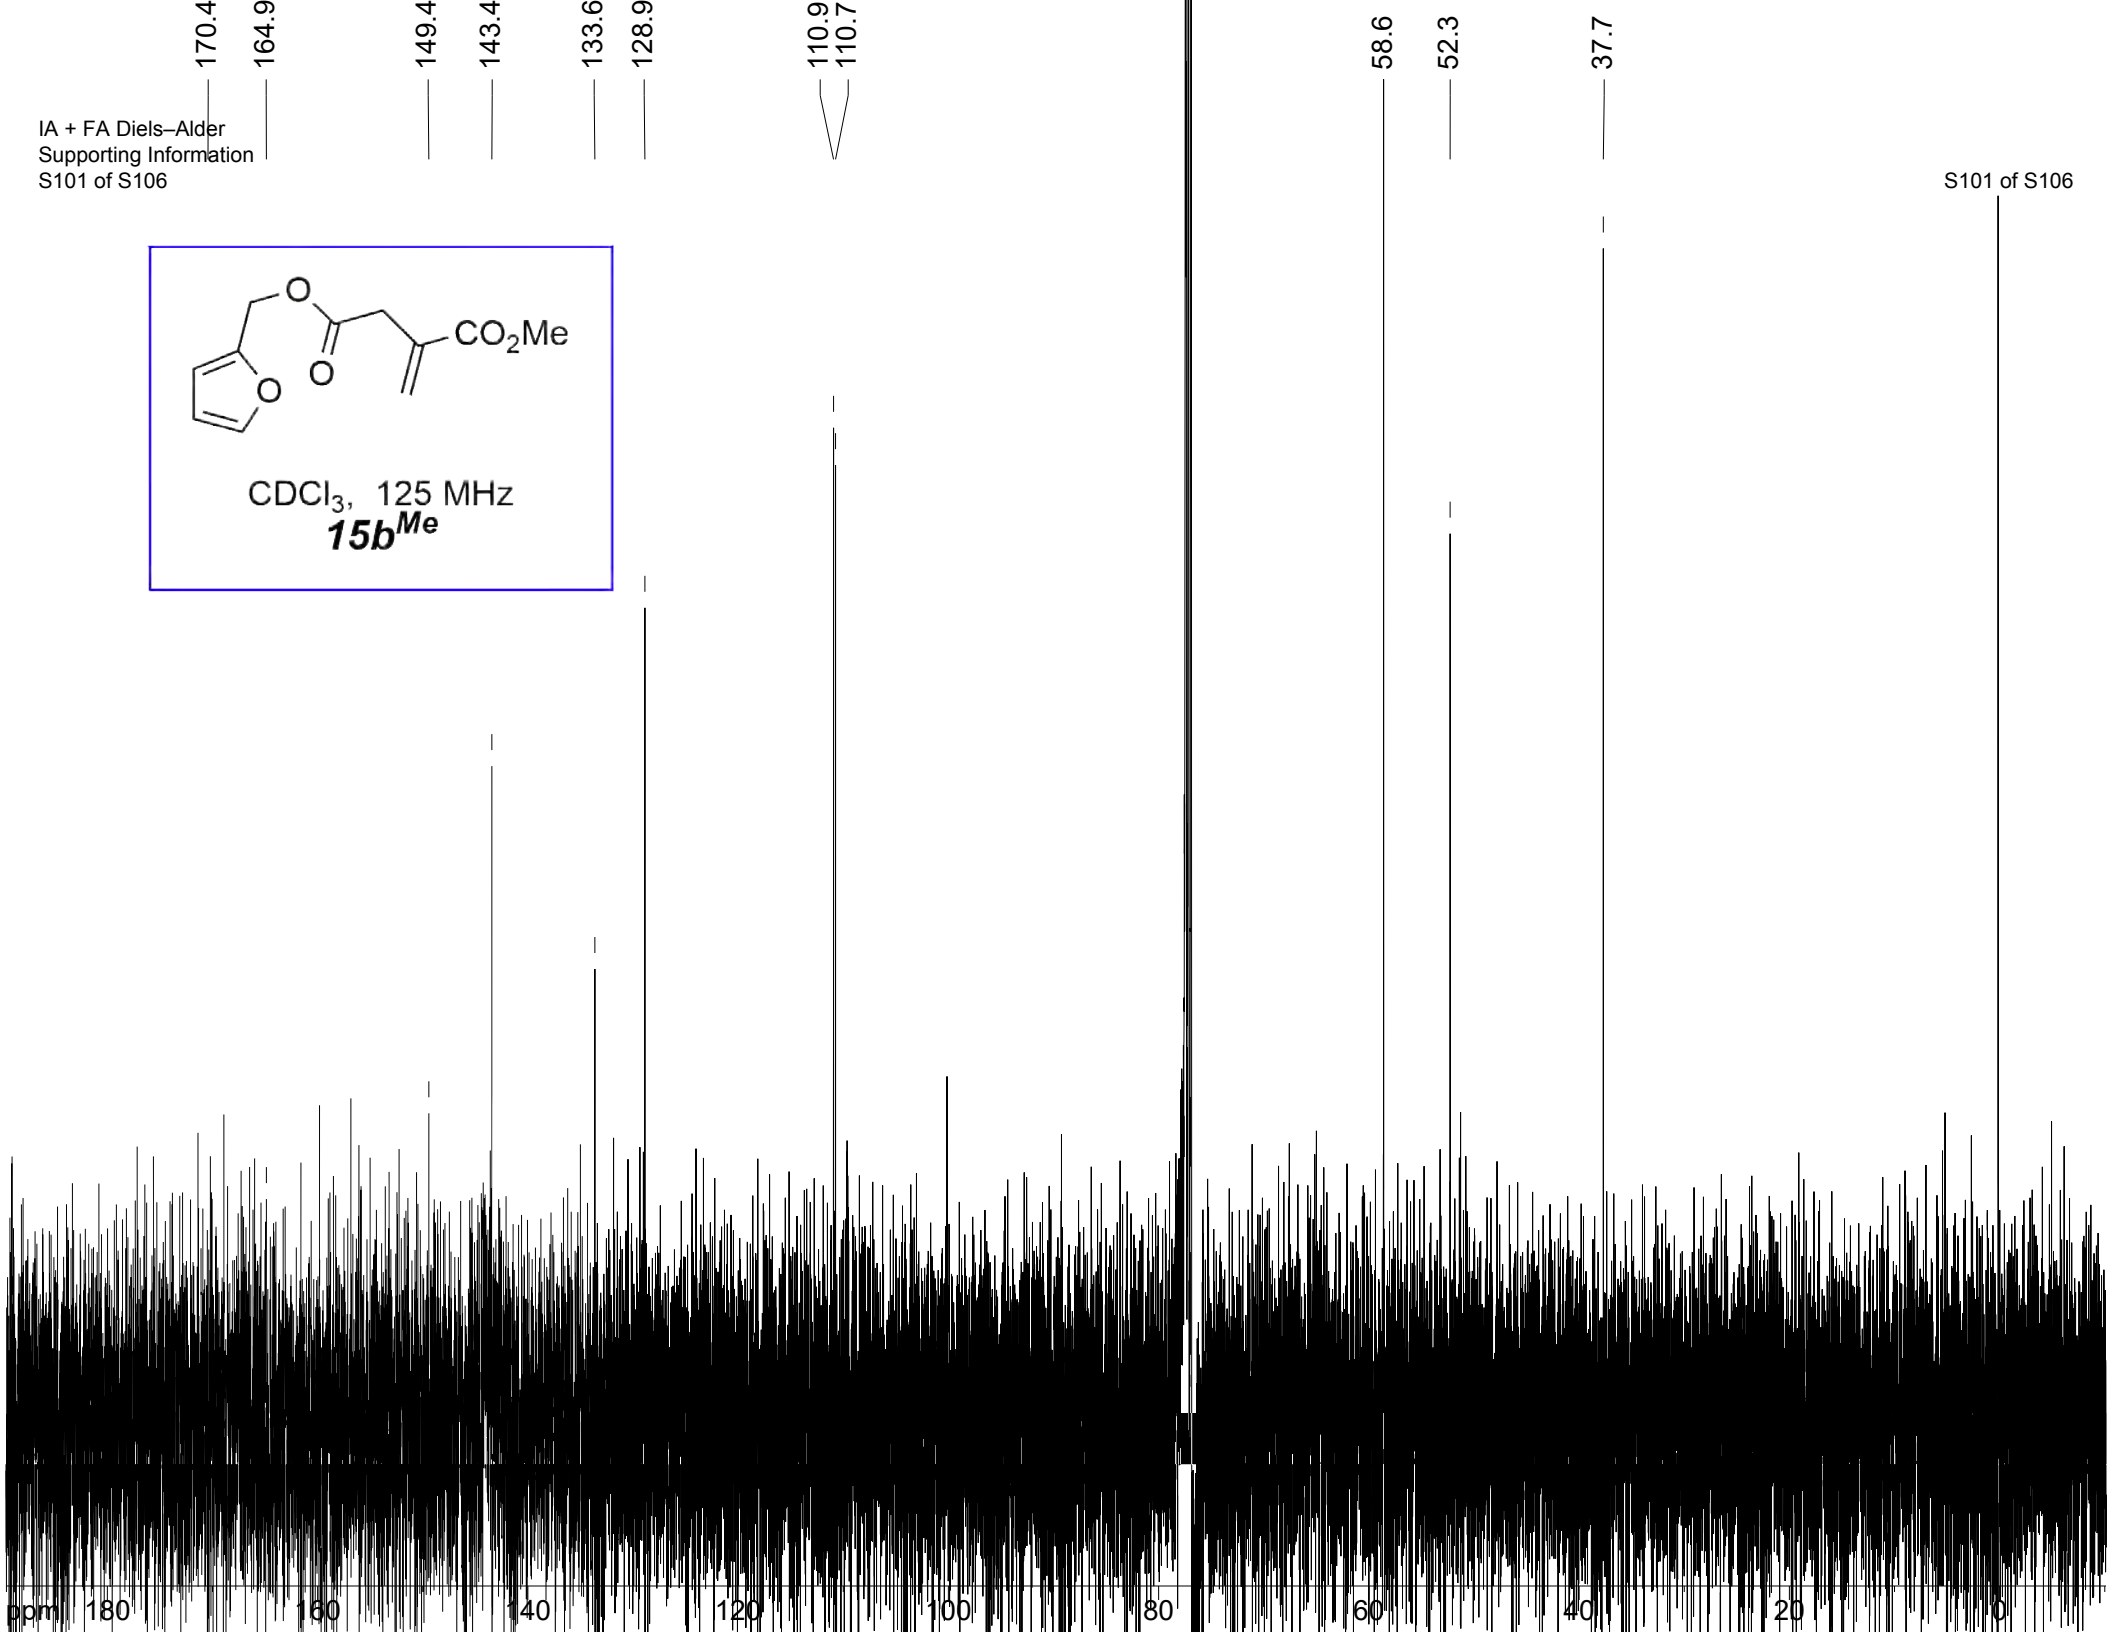

7.38  
7.37  
7.37  
7.36  
7.36  
7.36  
7.34  
7.34  
7.33  
7.33  
7.33  
7.32  
7.32  
7.31  
7.31  
7.31  
7.30  
7.30  
7.30  
6.48  
6.48  
6.48  
5.84  
5.84

IA + FA Diels-Alder  
Supporting Information  
S102 of S106

5.16

3.40  
3.40

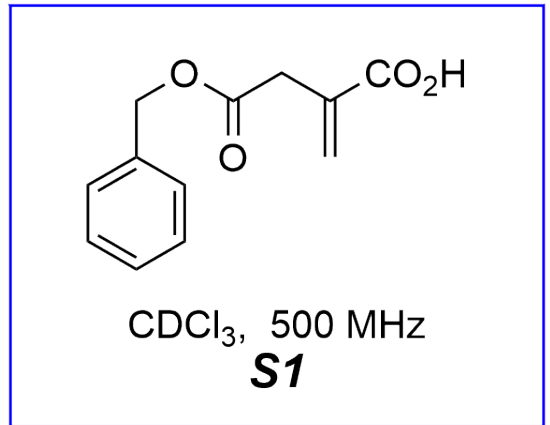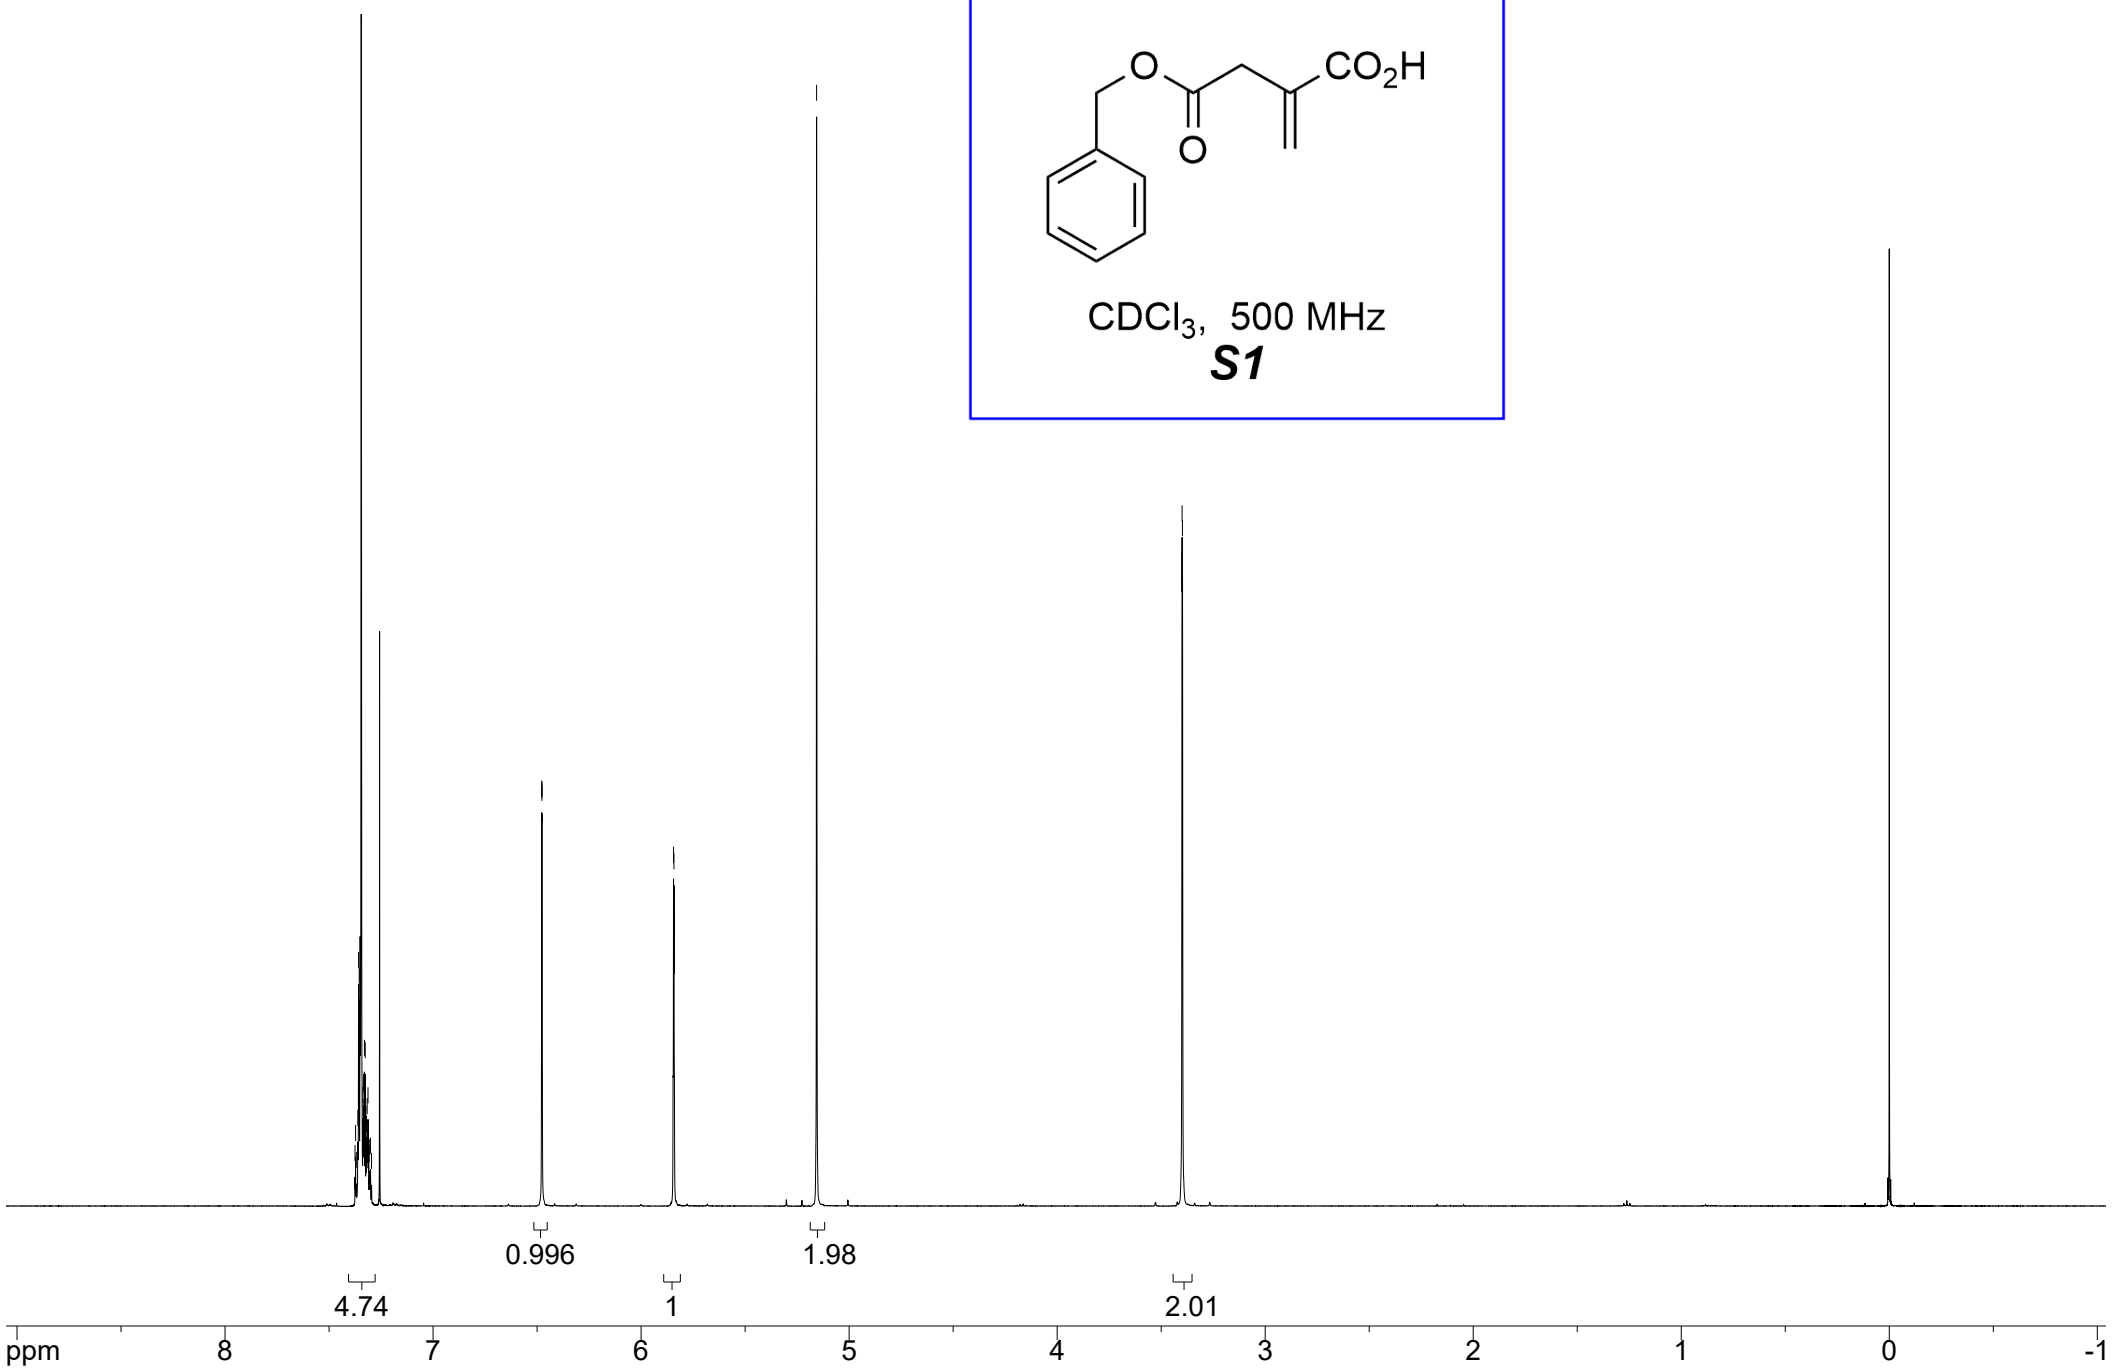

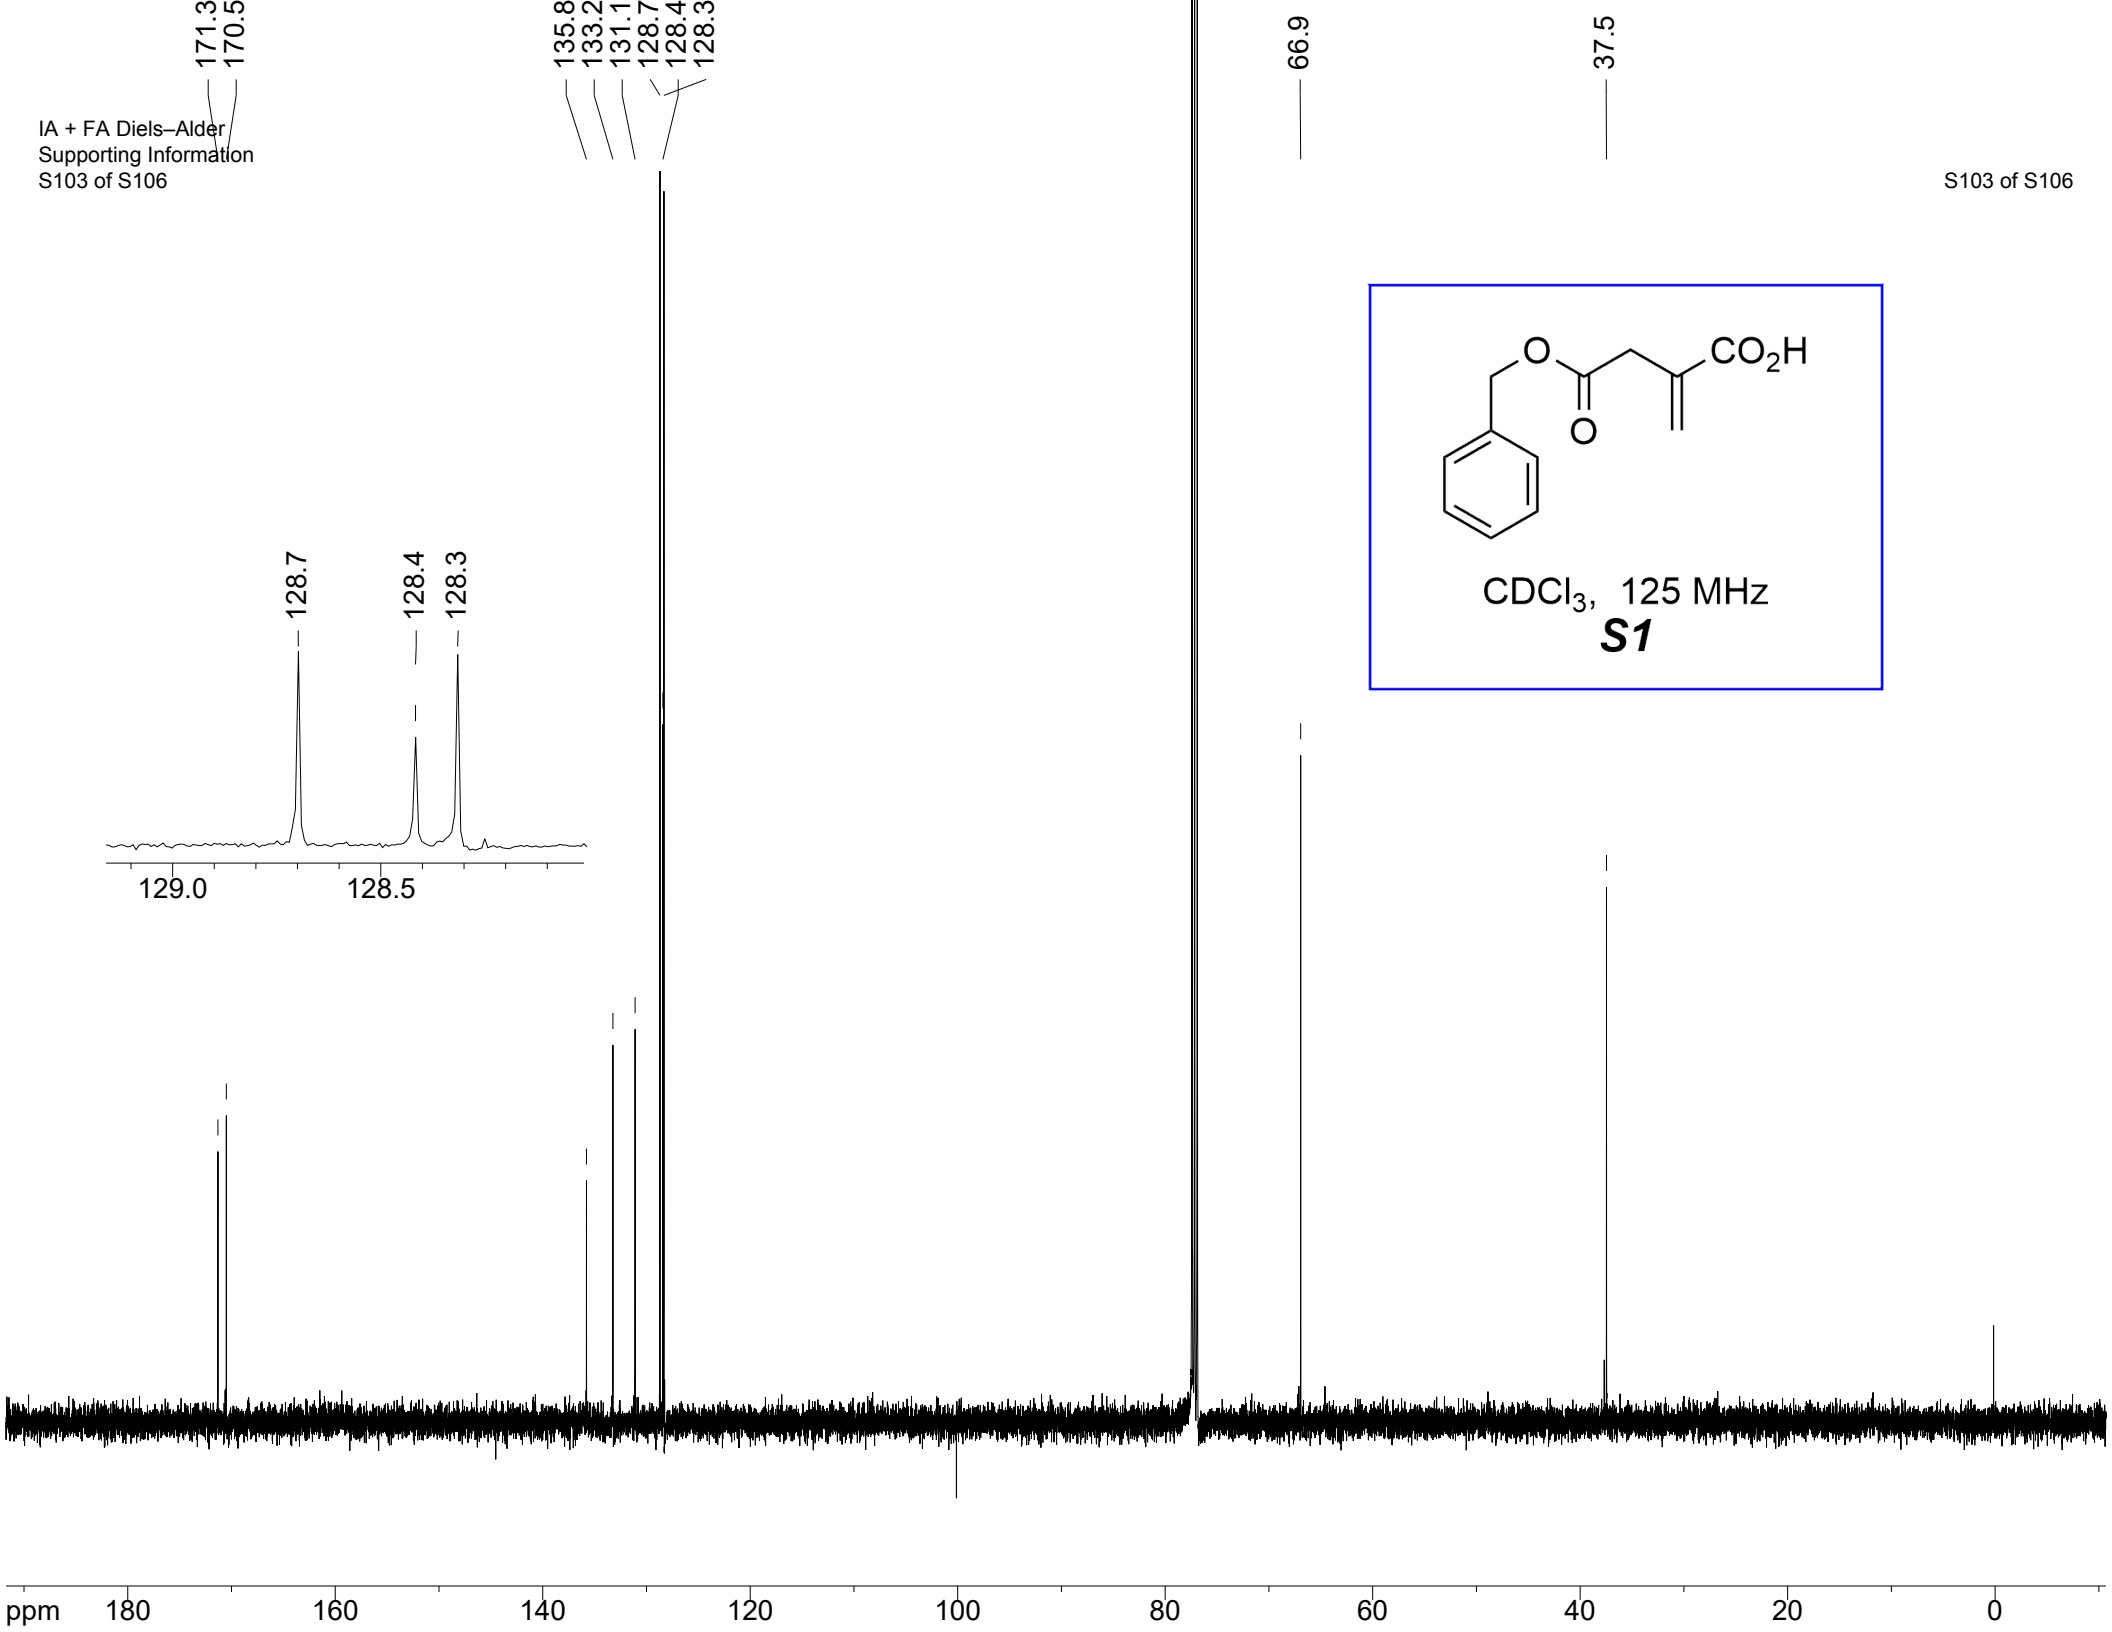

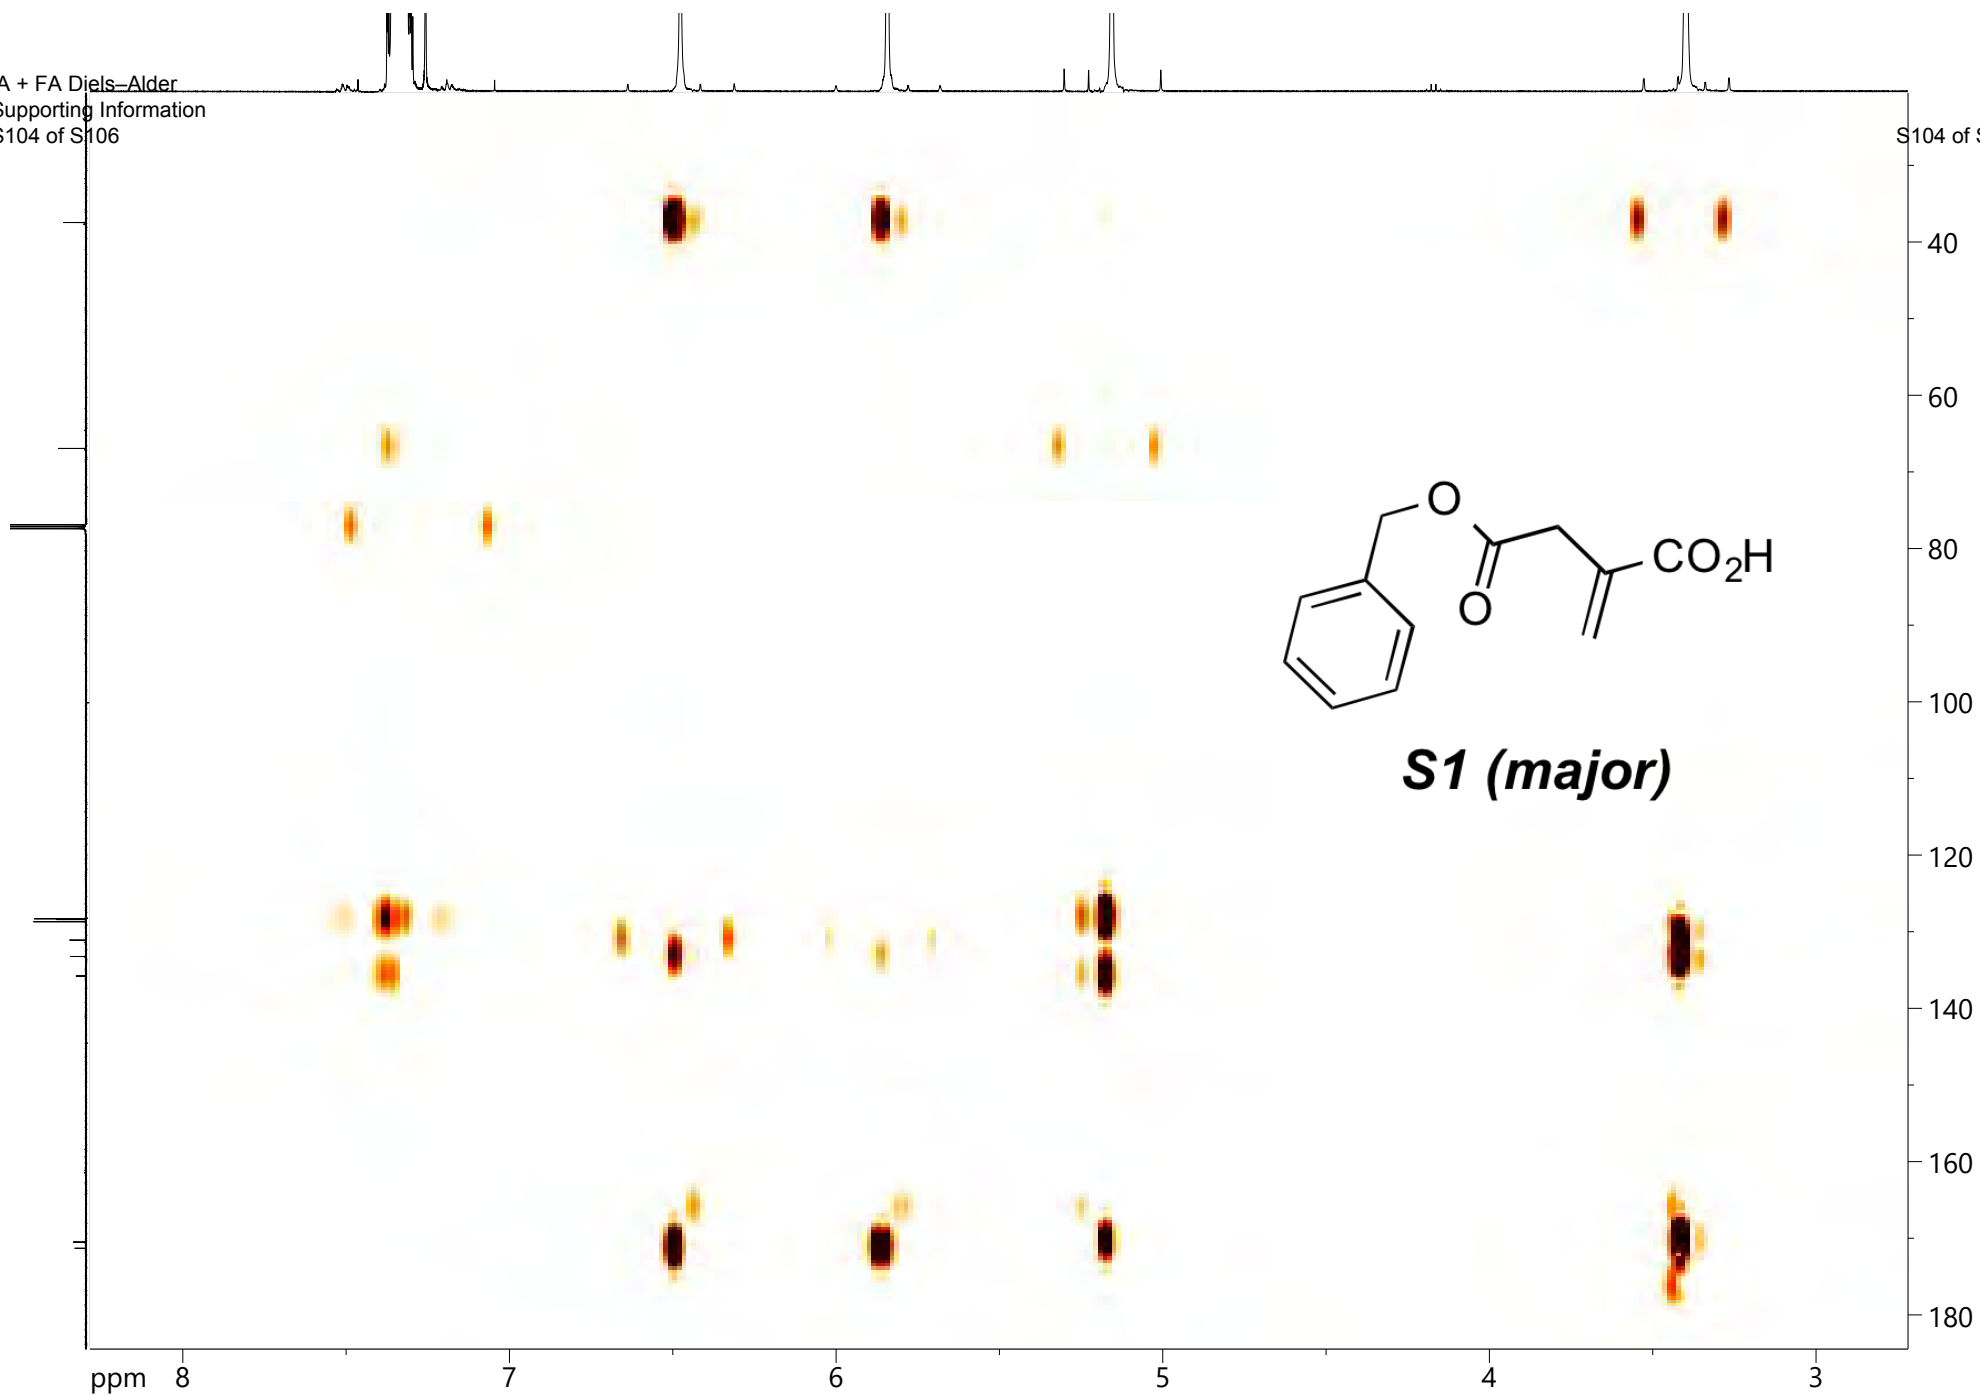

7.37  
7.36  
7.35  
7.35  
7.34  
7.33  
7.33  
7.33  
7.32  
7.32  
7.31  
7.31  
7.30  
7.30  
7.29  
6.47  
6.41  
5.84  
5.83  
5.78  
5.77  
5.22  
5.15  
3.42  
3.41  
3.39  
3.39

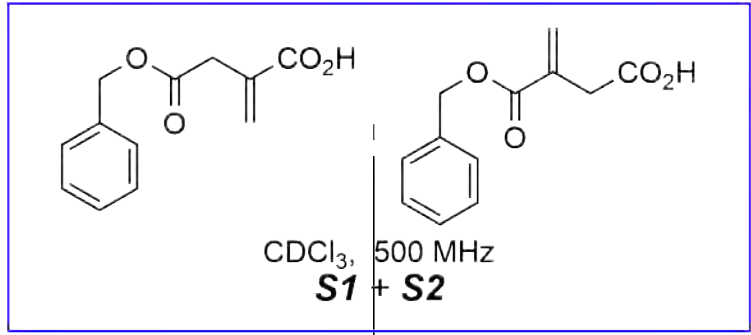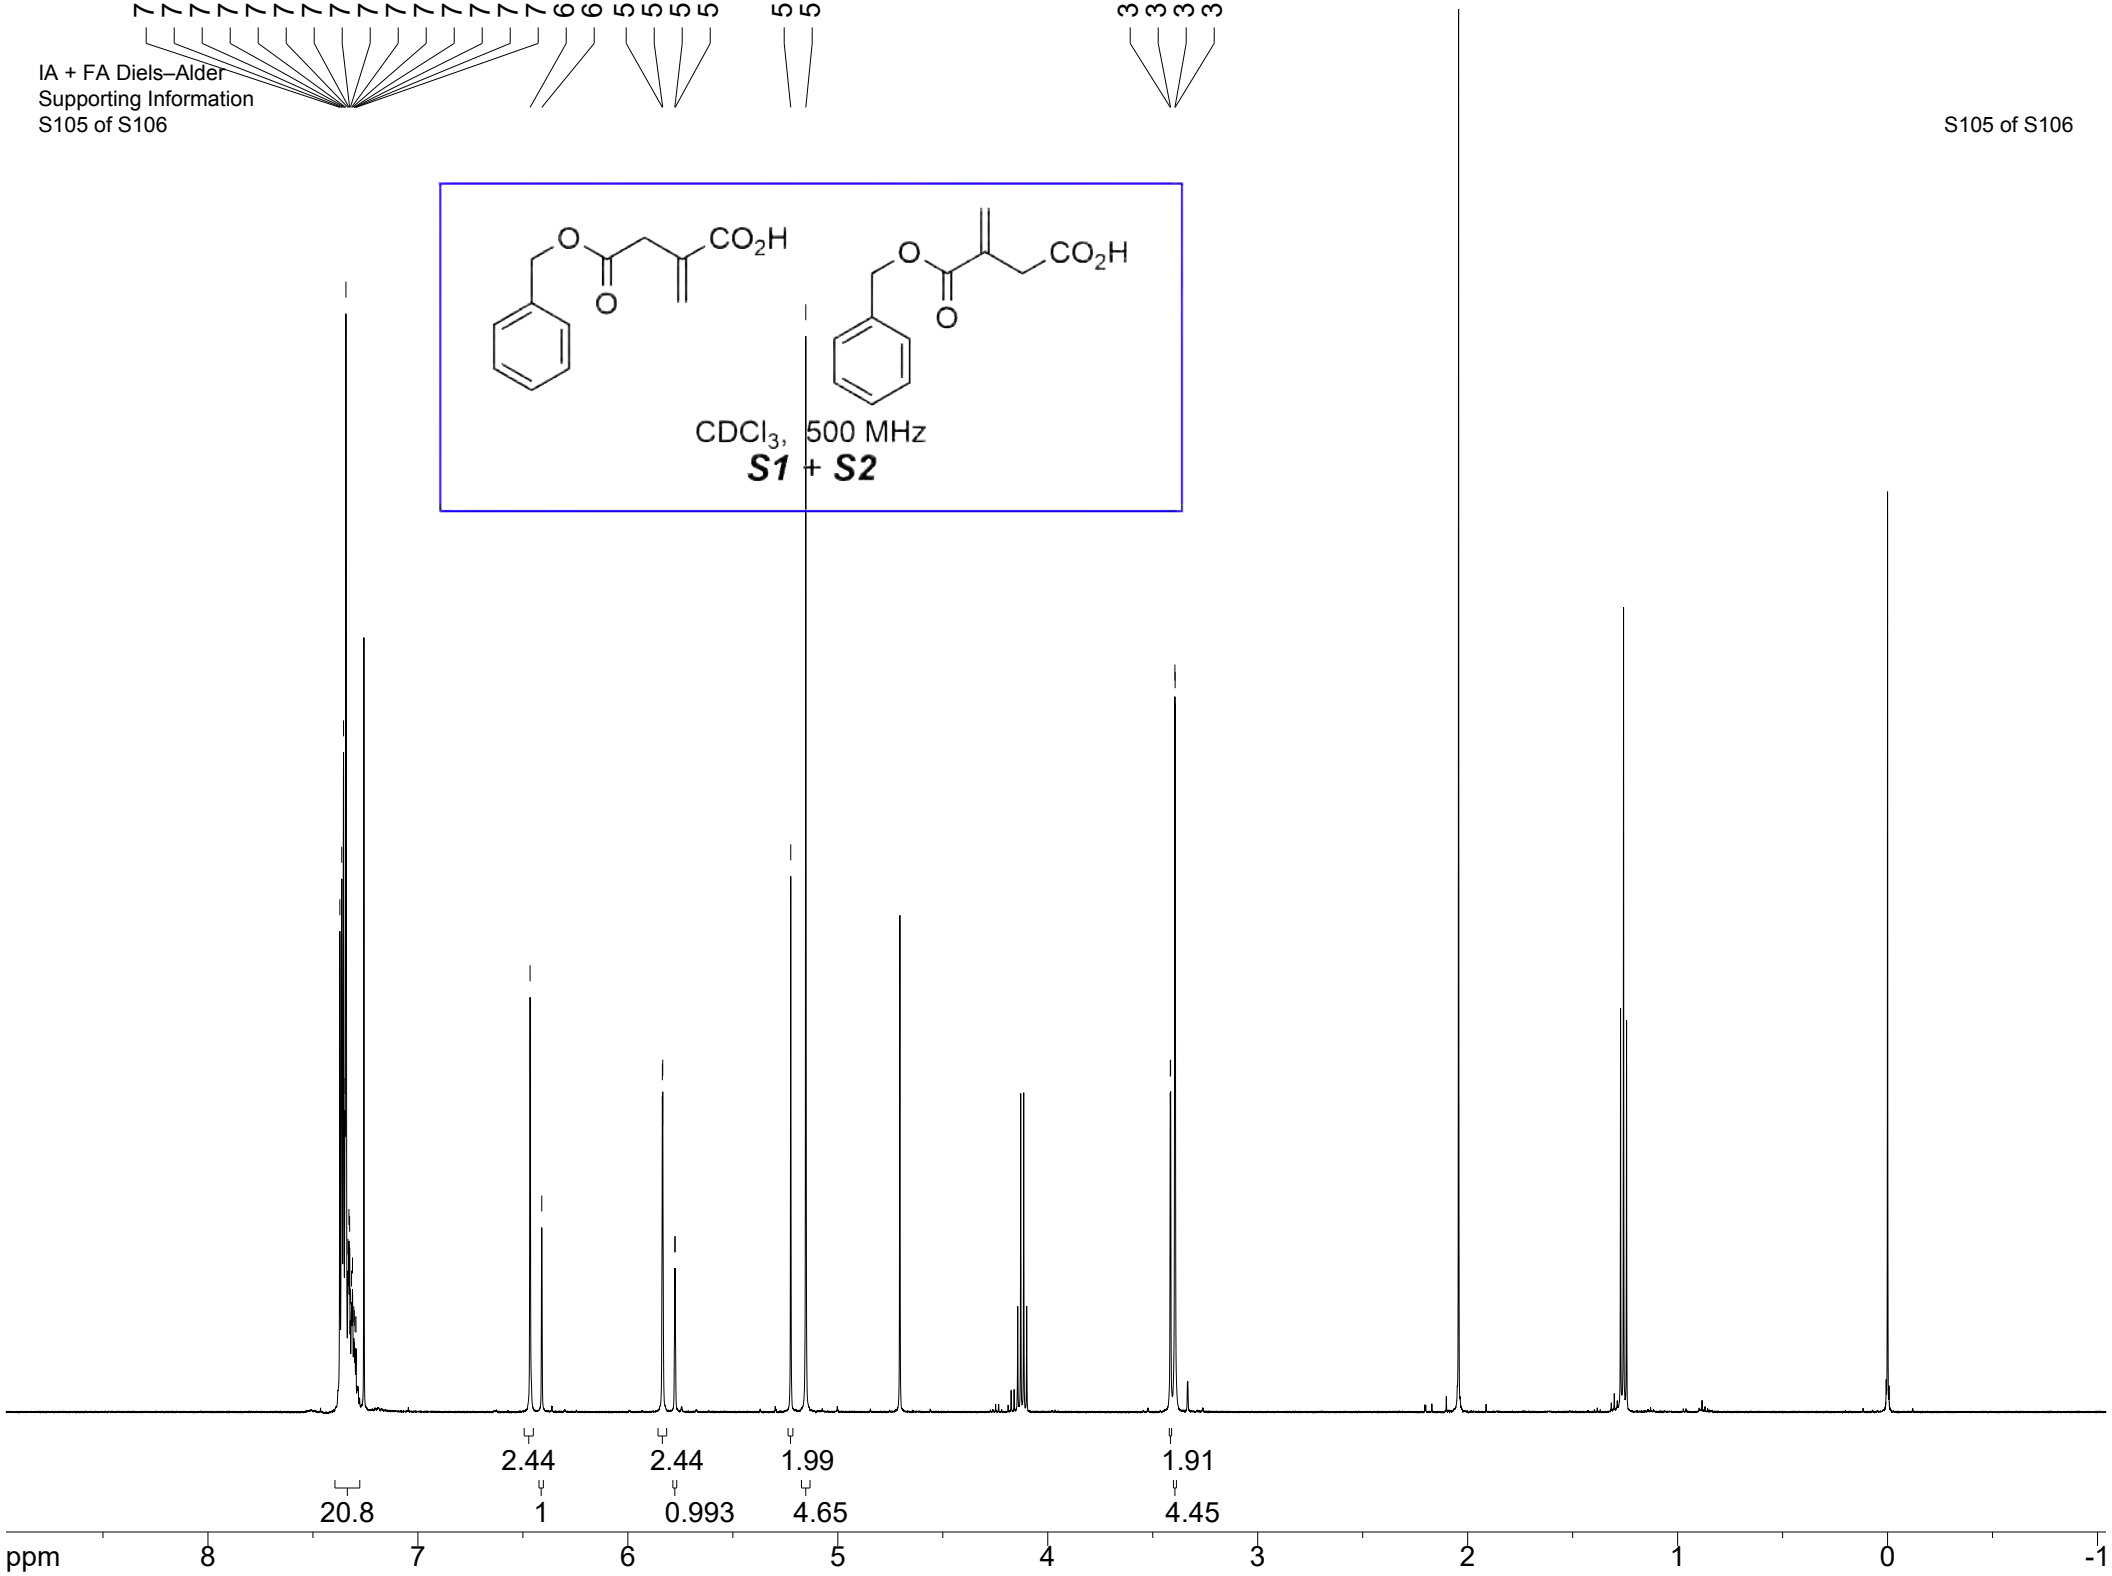

ppm 8 7 6 5 4 3 2 1 0 -1
